# Supplementary material for: Proteomic Profiling Skin Mucus of European Eel Anguilla anguilla Infected with Anguillid Herpesvirus
Source: MDPI journal article supplement (doi:10.3390/ijms231911283), 2022-09-24
Supplement: s1 [file s1]

**Table S3.** The target proteins selected for PRM analysis

| Protein Accession    | Protein Description                                                                                                                                                                                                  | Regulated Type | V/CK <i>p</i> Value |
|----------------------|----------------------------------------------------------------------------------------------------------------------------------------------------------------------------------------------------------------------|----------------|---------------------|
| F02_transcript_14379 | signal transducer and activator of transcription 1-like; K11220 signal transducer and activator of transcription 1 (A)                                                                                               | Up             | 0.00045973          |
| F02_transcript_28497 | Cysteine-rich secretory protein 2 [Zootermopsis nevadensis]                                                                                                                                                          | Up             | 0.0029971           |
| F02_transcript_25607 | serpinb14, im:7148243, si:ch73-303g23.4; serpin peptidase inhibitor, clade B (ovalbumin), member 14; K13963 serpin B (A)                                                                                             | Up             | 0.000122942         |
| F02_transcript_15352 | proactivator polypeptide-like; K12382 saposin (A)                                                                                                                                                                    | Up             | 0.0028559           |
| F02_transcript_15360 | lysosome-associated membrane glycoprotein 1-like; K06501 CD68 antigen (A)                                                                                                                                            | Up             | 0.0064393           |
| F02_transcript_25331 | ctsb, ctsb, id:ibd1201, wu:fa13g05, wu:fb34e12, zgc:55862, zgc:65809, zgc:77181; cathepsin Ba (EC:3.4.22.1); K01363 cathepsin B [EC:3.4.22.1] (A)                                                                    | Up             | 0.023523            |
| F02_transcript_29917 | hemoglobin subunit alpha-A-like; K13822 hemoglobin subunit alpha (A)                                                                                                                                                 | Up             | 0.0153992           |
| F02_transcript_29975 | ba1l, si:bY187G17.4; ba1 globin, like; K13825 hemoglobin subunit epsilon (A)                                                                                                                                         | Up             | 0.0142045           |
| F02_transcript_1706  | desmoglein-2-like; K07597 desmoglein 2 (A)                                                                                                                                                                           | Down           | 7.8735E-05          |
| F02_transcript_23496 | caveolin-1-like; K06278 caveolin 1 (A)                                                                                                                                                                               | Down           | 0.0061574           |
| F02_transcript_27261 | PYCARD; PYD and CARD domain containing; K12799 apoptosis-associated speck-like protein containing a CARD (A)                                                                                                         | Down           | 0.00092485          |
| F02_transcript_7859  | c-1-tetrahydrofolate synthase, cytoplasmic-like; K00288 methylenetetrahydrofolate dehydrogenase (NADP+)/methenyltetrahydrofolate cyclohydrolase / formyltetrahydrofolate synthetase [EC:1.5.1.5 3.5.4.9 6.3.4.3] (A) | Down           | 0.0094153           |
| F02_transcript_2511  | plakophilin-1-like; K10387 plakophilin 1 (A)                                                                                                                                                                         | Down           | 5.5521E-05          |
| F02_transcript_8206  | catenin beta-1-like; K02105 catenin beta 1 (A)                                                                                                                                                                       | Down           | 0.000122257         |
| F02_transcript_3978  | adenosine deaminase-like; K01488 adenosine deaminase [EC:3.5.4.4] (A)                                                                                                                                                | Down           | 0.00033975          |
| F02_transcript_1362  | dsc2l, dsc, sb:cb859, wu:fa94h05; desmocollin 2 like; K07601 desmocollin 2 (A)                                                                                                                                       | Down           | 5.545E-05           |
| F02_transcript_893   | dspe, im:6911953, sb:cb570, wu:fc17a08, wu:fk73d01; desmoplakin a; K10381 desmoplakin (A)                                                                                                                            | Down           | 0.000584            |
| F02_transcript_9314  | deoxynucleoside triphosphate triphosphohydrolase SAMHD1 [Gallus gallus]                                                                                                                                              | Down           | 1.79666E-05         |
| F02_transcript_24094 | zgc:158870; K06752 major histocompatibility complex, class II (A)                                                                                                                                                    | Down           | 0.00026136          |
