# Supplementary material for: Proteomic Profiling Skin Mucus of European Eel Anguilla anguilla Infected with Anguillid Herpesvirus
Source: MDPI journal article supplement (doi:10.3390/ijms231911283), 2022-09-24
Supplement: s1 [file s1]

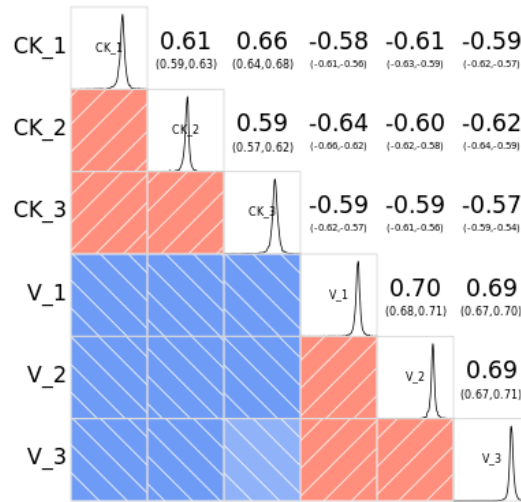

**Figure S1.** The heat map of the Pearson correlation coefficient for protein quantification between pairwise samples. The closer Pearson's coefficient is to -1, the negative correlation; the closer Pearson's coefficient is to 1, the positive correlation; and the closer Pearson's coefficient is to 0, the uncorrelation.
