# Supplementary material for: Proteomic Profiling Skin Mucus of European Eel Anguilla anguilla Infected with Anguillid Herpesvirus
Source: MDPI journal article supplement (doi:10.3390/ijms231911283), 2022-09-24
Supplement: s1 [file s1]

**Table S4.** The parameters used for mass spectrum analysis and peptides identification.

| Mass Spectrum Parameters |          |                     |             | The Peptides Parameters              |                                           |
|--------------------------|----------|---------------------|-------------|--------------------------------------|-------------------------------------------|
| Name                     | Setting  | Name                | Setting     | Name                                 | Setting                                   |
| Use lock masses          | No       | Fixed first mass    | 100         | Enzyme digestion method              | Trypsin/P                                 |
| Peptide match            | Yes      | NCE/stepped NCE     | 32          | Number of missed cuts                | 2                                         |
| MS AGC target            | 2.00E+05 | Isolation window    | 1.6         | mass tolerance for the precursor ion | 10.0 ppm                                  |
| MS Maximum IT            | 50 ms    | Intensity threshold | 2.00E+04    | mass tolerance for fragment ion      | 0.02 Da                                   |
| MS Scan range            | 400-1500 | Charge exclusion    | 1, $\geq 6$ | fixed modification                   | Carbamidomethyl(C)                        |
| MS Resolution            | 60,000   | ddMS2 TopN          | 20          | variable modification                | Oxidation(M), Acetyl (Protein N-term), NQ |
| MS2 Resolution           | 15,000   | MS2 AGC target      | 5.00E+04    | quantitative method                  | TMT 6plex                                 |
| Dynamic exclusion        | 30s      | MS2 Maximum IT      | 70 ms       | Peptide scoring threshold            | Aug-40                                    |
