# Supplementary material for: Proteomic Profiling Skin Mucus of European Eel Anguilla anguilla Infected with Anguillid Herpesvirus
Source: Int J Mol Sci. 2022 Sep 24;23(19):11283. doi: 10.3390/ijms231911283 (PMC9570476; doi:10.3390/ijms231911283)
Supplement: Supplementary file 1 [file ijms-23-11283-s001.zip]

Archive with 5 entries (5 files):
- Figure S1.pdf
- Table S1.xlsx
- Table S2.xlsx
- Table S3.pdf
- Table S4.pdf
