# Supplementary material for: Proteomic Profiling Skin Mucus of European Eel Anguilla anguilla Infected with Anguillid Herpesvirus
Source: Int J Mol Sci. 2022 Sep 24;23(19):11283. doi: 10.3390/ijms231911283 (PMC9570476; doi:10.3390/ijms231911283)
Supplement: Supplementary file 1 [file ijms-23-11283-s001.zip › Table S1.xlsx]

## Sheet: Annotation_combine
Table S1 Annotation of the identified proteins.
Protein accession	Protein description	MW [kDa]	Coverage [%]	Peptides	PSMs	Unique peptides	CK_1	CK_2	CK_3	V_1	V_2	V_3	V/CK Ratio	V/CK P value	Subcellular localization	Biological Process	Cellular Component	Molecular Function	KEGG KO No.	KEGG Gene	KEGG pathway	Pfam ID	Domain description	KOG category	KOG NO.	KOG description
F02_transcript_967	Uncharacterized protein	35.61	29.4	8	22	6	0.207	0.213	0.264	2.15	1.467	1.59	7.613	0.000135656	extracellular	GO:0000082 G1/S transition of mitotic cell cycle; GO:0000278 mitotic cell cycle; GO:0006139 nucleobase-containing compound metabolic process; GO:0006259 DNA metabolic process; GO:0006260 DNA replication; GO:0006261 DNA-dependent DNA replication; GO:0006270 DNA replication initiation; GO:0006323 DNA packaging; GO:0006325 chromatin organization; GO:0006342 chromatin silencing; GO:0006355 regulation…	GO:0000228 nuclear chromosome; GO:0005622 intracellular; GO:0005623 cell; GO:0005634 nucleus; GO:0005654 nucleoplasm; GO:0005657 replication fork; GO:0005694 chromosome; GO:0005730 nucleolus; GO:0031298 replication fork protection complex; GO:0031974 membrane-enclosed lumen; GO:0031981 nuclear lumen; GO:0032991 macromolecular complex; GO:0043226 organelle; GO:0043227 membrane-bounded organelle; G…	GO:0003676 nucleic acid binding; GO:0003677 DNA binding; GO:0003688 DNA replication origin binding; GO:0003690 double-stranded DNA binding; GO:0003697 single-stranded DNA binding; GO:0005488 binding; GO:0005515 protein binding; GO:0019899 enzyme binding; GO:0042802 identical protein binding; GO:0043565 sequence-specific DNA binding; GO:0097159 organic cyclic compound binding; GO:1901363 heterocyc…	K19946	OPTN, FIP2; optineurin	dre04137 Mitophagy - animal - Danio rerio (zebrafish);			D	KOG3056	Protein required for S-phase initiation or completion
F02_transcript_25634	cirbpa, wu:fb12a12, wu:fb16h02, wu:fb55a06, wu:fc67h01, wu:fj10g10, zgc:109887, zgc:112425; cold inducible RNA binding protein a; K13195 cold-inducible RNA-binding protein (A)	18.665	32.2	6	19	1	0.305	0.273	0.224	1.707	1.723	1.886	6.628	3.9061e-05	nucleus				K13195	CIRBP; cold-inducible RNA-binding protein		PF00076	RNA recognition motif. (a.k.a. RRM, RBD, or RNP domain)	A	KOG0118	FOG: RRM domain
F02_transcript_28732	Uncharacterized protein	15.215	36.5	4	7	4	0.262	0.209	0.285	1.817	1.443	1.638	6.479	8.034e-05	nucleus				K17493	CAMSAP; calmodulin-regulated spectrin-associated protein
F02_transcript_15334	calpain-9-like; K08578 calpain-9 [EC:3.4.22.-] (A)	78.191	48.7	27	90	1	0.196	0.388	0.311	1.84	1.622	1.743	5.816	0.00092132	cytoplasm	GO:0000003 reproduction; GO:0000768 syncytium formation by plasma membrane fusion; GO:0001667 ameboidal-type cell migration; GO:0002064 epithelial cell development; GO:0002065 columnar/cuboidal epithelial cell differentiation; GO:0002066 columnar/cuboidal epithelial cell development; GO:0003002 regionalization; GO:0003006 developmental process involved in reproduction; GO:0006355 regulation of tr…	GO:0005622 intracellular; GO:0005623 cell; GO:0005737 cytoplasm; GO:0005856 cytoskeleton; GO:0015629 actin cytoskeleton; GO:0036477 somatodendritic compartment; GO:0043025 neuronal cell body; GO:0043226 organelle; GO:0043228 non-membrane-bounded organelle; GO:0043229 intracellular organelle; GO:0043232 intracellular non-membrane-bounded organelle; GO:0044297 cell body; GO:0044424 intracellular pa…	GO:0003824 catalytic activity; GO:0004175 endopeptidase activity; GO:0004197 cysteine-type endopeptidase activity; GO:0004198 calcium-dependent cysteine-type endopeptidase activity; GO:0005488 binding; GO:0005509 calcium ion binding; GO:0008233 peptidase activity; GO:0008234 cysteine-type peptidase activity; GO:0016787 hydrolase activity; GO:0043167 ion binding; GO:0043169 cation binding; GO:0046…	K08578	CAPN9; calpain-9 [EC:3.4.22.-]		PF01067; PF13833	Calpain large subunit, domain III; EF-hand domain pair	OT	KOG0045	Cytosolic Ca2+-dependent cysteine protease (calpain), large subunit (EF-Hand protein superfamily)
F02_transcript_26330	Creatine kinase [Schizopygopsis pylzovi]	42.862	17.1	6	6	3	0.393	0.196	0.377	1.631	1.678	1.837	5.327	0.0171795	cytoplasm	GO:0006082 organic acid metabolic process; GO:0006520 cellular amino acid metabolic process; GO:0006575 cellular modified amino acid metabolic process; GO:0006599 phosphagen metabolic process; GO:0006600 creatine metabolic process; GO:0006603 phosphocreatine metabolic process; GO:0006793 phosphorus metabolic process; GO:0006796 phosphate-containing compound metabolic process; GO:0006807 nitrogen …	GO:0005576 extracellular region; GO:0005615 extracellular space; GO:0005622 intracellular; GO:0005623 cell; GO:0005737 cytoplasm; GO:0005829 cytosol; GO:0044421 extracellular region part; GO:0044424 intracellular part; GO:0044444 cytoplasmic part; GO:0044464 cell part;	GO:0003824 catalytic activity; GO:0004111 creatine kinase activity; GO:0016301 kinase activity; GO:0016740 transferase activity; GO:0016772 transferase activity, transferring phosphorus-containing groups; GO:0016775 phosphotransferase activity, nitrogenous group as acceptor;	K00933	E2.7.3.2; creatine kinase [EC:2.7.3.2]	dre00330 Arginine and proline metabolism - Danio rerio (zebrafish); dre01100 Metabolic pathways - Danio rerio (zebrafish);	PF02807; PF00217	ATP:guanido phosphotransferase, N-terminal domain; ATP:guanido phosphotransferase, C-terminal catalytic domain	C	KOG3581	Creatine kinases
F02_transcript_28956	Uncharacterized protein	22.296	32.2	5	9	5	0.296	0.36	0.292	1.817	1.471	1.655	5.214	5.7233e-05	nucleus				K18465	MRT43, SWIP; WASH complex subunit 7	dre04144 Endocytosis - Danio rerio (zebrafish);
F02_transcript_1293	calpastatin-like; K04281 calpastatin (A)	79.967	49.5	36	83	4	0.36	0.361	0.283	1.617	1.809	1.683	5.089	4.3879e-05	nucleus	GO:0000003 reproduction; GO:0000768 syncytium formation by plasma membrane fusion; GO:0001775 cell activation; GO:0001889 liver development; GO:0006807 nitrogen compound metabolic process; GO:0006949 syncytium formation; GO:0007275 multicellular organism development; GO:0007338 single fertilization; GO:0007343 egg activation; GO:0007399 nervous system development; GO:0007417 central nervous syste…	GO:0005622 intracellular; GO:0005623 cell; GO:0005634 nucleus; GO:0005737 cytoplasm; GO:0005783 endoplasmic reticulum; GO:0005829 cytosol; GO:0012505 endomembrane system; GO:0014069 postsynaptic density; GO:0016020 membrane; GO:0032279 asymmetric synapse; GO:0043226 organelle; GO:0043227 membrane-bounded organelle; GO:0043229 intracellular organelle; GO:0043231 intracellular membrane-bounded orga…	GO:0002020 protease binding; GO:0004857 enzyme inhibitor activity; GO:0004866 endopeptidase inhibitor activity; GO:0004869 cysteine-type endopeptidase inhibitor activity; GO:0005488 binding; GO:0005515 protein binding; GO:0010859 calcium-dependent cysteine-type endopeptidase inhibitor activity; GO:0019899 enzyme binding; GO:0030234 enzyme regulator activity; GO:0030414 peptidase inhibitor activit…	K04281	CAST; calpastatin
F02_transcript_26934	keratin, type I cytoskeletal 13-like; K07604 type I keratin, acidic (A)	38.625	42.3	15	28	13	0.342	0.39	0.318	1.628	1.693	1.7	4.782	1.69289e-05	cytoplasm
F02_transcript_7363	cadherin-13 precursor [Sus scrofa]	61.292	38.2	17	45	1	0.396	0.287	0.402	2.149	1.251	1.593	4.602	0.00137945	cytoplasm				K22658			PF00028	Cadherin domain	S	KOG3594	FOG: Cadherin repeats
F02_transcript_23050	putative protein PHLOEM PROTEIN 2-LIKE A3 [Stylophora pistillata]	31.704	12.8	4	6	2	0.331	0.391	0.393	2.122	1.261	1.579	4.45	0.00079501	cytoplasm							PF04548	AIG1 family
F02_transcript_5762	putative protein PHLOEM PROTEIN 2-LIKE A3 [Stylophora pistillata]	113.42	1.6	2	3	2	0.4	0.403	0.397	1.382	2.005	1.528	4.096	0.0062784	cytoplasm							PF04548	AIG1 family
F02_transcript_4382	senp5, si:ch211-258l4.2, si:ch211-258l4.3; SUMO1/sentrin specific peptidase 5 (EC:3.4.22.68); K08594 sentrin-specific protease 5 [EC:3.4.22.68] (A)	77.594	1.2	1	1	1	0.437	0.374	0.405	1.595	1.684	1.606	4.017	4.231e-06	nucleus	GO:0000902 cell morphogenesis; GO:0000904 cell morphogenesis involved in differentiation; GO:0001666 response to hypoxia; GO:0002682 regulation of immune system process; GO:0002683 negative regulation of immune system process; GO:0006464 cellular protein modification process; GO:0006508 proteolysis; GO:0006807 nitrogen compound metabolic process; GO:0006950 response to stress; GO:0007275 multicel…	GO:0005622 intracellular; GO:0005623 cell; GO:0005634 nucleus; GO:0005635 nuclear envelope; GO:0005637 nuclear inner membrane; GO:0005643 nuclear pore; GO:0005654 nucleoplasm; GO:0005737 cytoplasm; GO:0012505 endomembrane system; GO:0016020 membrane; GO:0019866 organelle inner membrane; GO:0031090 organelle membrane; GO:0031965 nuclear membrane; GO:0031967 organelle envelope; GO:0031974 membrane-…	GO:0003824 catalytic activity; GO:0004175 endopeptidase activity; GO:0004197 cysteine-type endopeptidase activity; GO:0005488 binding; GO:0005515 protein binding; GO:0008233 peptidase activity; GO:0008234 cysteine-type peptidase activity; GO:0016787 hydrolase activity; GO:0016929 SUMO-specific protease activity; GO:0019783 ubiquitin-like protein-specific protease activity; GO:0070011 peptidase ac…	K08594	SENP5; sentrin-specific protease 5 [EC:3.4.22.68]		PF02902	Ulp1 protease family, C-terminal catalytic domain	O	KOG0778	Protease, Ulp1 family
F02_transcript_24100	diamine acetyltransferase 1 [Sus scrofa]	11.433	15.8	1	1	1	0.261	0.482		1.052	1.819	1.501	3.923	0.020482	cytoplasm	GO:0001525 angiogenesis; GO:0001568 blood vessel development; GO:0001944 vasculature development; GO:0006576 cellular biogenic amine metabolic process; GO:0006595 polyamine metabolic process; GO:0006596 polyamine biosynthetic process; GO:0006598 polyamine catabolic process; GO:0006807 nitrogen compound metabolic process; GO:0007275 multicellular organism development; GO:0008152 metabolic process;…	GO:0005622 intracellular; GO:0005623 cell; GO:0005737 cytoplasm; GO:0005829 cytosol; GO:0044424 intracellular part; GO:0044444 cytoplasmic part; GO:0044464 cell part;	GO:0003824 catalytic activity; GO:0004145 diamine N-acetyltransferase activity; GO:0005488 binding; GO:0005515 protein binding; GO:0008080 N-acetyltransferase activity; GO:0016407 acetyltransferase activity; GO:0016410 N-acyltransferase activity; GO:0016740 transferase activity; GO:0016746 transferase activity, transferring acyl groups; GO:0016747 transferase activity, transferring acyl groups ot…	K00657	speG, SAT; diamine N-acetyltransferase [EC:2.3.1.57]	dre00330 Arginine and proline metabolism - Danio rerio (zebrafish); dre01100 Metabolic pathways - Danio rerio (zebrafish); dre04216 Ferroptosis - Danio rerio (zebrafish);			E	KOG3216	Diamine acetyltransferase
F02_transcript_29094	ferritin, middle subunit-like; K00522 ferritin heavy chain [EC:1.16.3.2] (A)	20.509	35.8	6	6	6	0.408	0.45	0.442	1.625	1.672	1.556	3.733	1.7886e-06	cytoplasm							PF00210	Ferritin-like domain	P	KOG2332	Ferritin
F02_transcript_29986	Uncharacterized protein	12.852	15.8	1	4	1	0.357	0.445	0.467	1.461	1.765	1.504	3.727	0.00020096	extracellular							PF00059	Lectin C-type domain	T	KOG4297	C-type lectin
F02_transcript_28941	si:rp71-1c23.2 [Danio rerio]	17.308	14.9	2	3	2	0.433	0.446	0.421	1.57	1.557	1.667	3.688	5.6476e-07	cytoplasm	GO:0000731 DNA synthesis involved in DNA repair; GO:0001817 regulation of cytokine production; GO:0001818 negative regulation of cytokine production; GO:0002252 immune effector process; GO:0002376 immune system process; GO:0002682 regulation of immune system process; GO:0002684 positive regulation of immune system process; GO:0006139 nucleobase-containing compound metabolic process; GO:0006259 DN…	GO:0005576 extracellular region; GO:0005622 intracellular; GO:0005623 cell; GO:0005634 nucleus; GO:0005654 nucleoplasm; GO:0005737 cytoplasm; GO:0005829 cytosol; GO:0031974 membrane-enclosed lumen; GO:0031981 nuclear lumen; GO:0043226 organelle; GO:0043227 membrane-bounded organelle; GO:0043229 intracellular organelle; GO:0043231 intracellular membrane-bounded organelle; GO:0043233 organelle lume…	GO:0031386 protein tag;				PF00240	Ubiquitin family	O	KOG0001	Ubiquitin and ubiquitin-like proteins
F02_transcript_15230	protein O-glucosyltransferase 1-like; K13667 protein glucosyltransferase [EC:2.4.1.-] (A)	46.283	7.4	3	3	3	0.442	0.485	0.385	1.587	1.372	1.817	3.64	0.00025729	extracellular	GO:0001654 eye development; GO:0001745 compound eye morphogenesis; GO:0001751 compound eye photoreceptor cell differentiation; GO:0001754 eye photoreceptor cell differentiation; GO:0001756 somitogenesis; GO:0003002 regionalization; GO:0006464 cellular protein modification process; GO:0006486 protein glycosylation; GO:0006493 protein O-linked glycosylation; GO:0006629 lipid metabolic process; GO:0…	GO:0005622 intracellular; GO:0005623 cell; GO:0005737 cytoplasm; GO:0005783 endoplasmic reticulum; GO:0005788 endoplasmic reticulum lumen; GO:0012505 endomembrane system; GO:0031974 membrane-enclosed lumen; GO:0043226 organelle; GO:0043227 membrane-bounded organelle; GO:0043229 intracellular organelle; GO:0043231 intracellular membrane-bounded organelle; GO:0043233 organelle lumen; GO:0044422 org…	GO:0003824 catalytic activity; GO:0008194 UDP-glycosyltransferase activity; GO:0016740 transferase activity; GO:0016757 transferase activity, transferring glycosyl groups; GO:0016758 transferase activity, transferring hexosyl groups; GO:0016763 transferase activity, transferring pentosyl groups; GO:0035251 UDP-glucosyltransferase activity; GO:0035252 UDP-xylosyltransferase activity; GO:0042285 xy…	K13667	RUMI, KTELC1; protein glucosyltransferase [EC:2.4.1.-]	dre00514 Other types of O-glycan biosynthesis - Danio rerio (zebrafish);			S	KOG2458	Endoplasmic reticulum protein EP58, contains filamin rod domain and KDEL motif
F02_transcript_29383	PREDICTED: aggrecan core protein [Nannospalax galili]	18.511	25.5	3	12	3	0.452	0.423	0.426	1.572	1.655	1.419	3.571	1.70292e-05	extracellular							PF00059	Lectin C-type domain	T	KOG4297	C-type lectin
F02_transcript_24417	Uncharacterized protein	13.5	18	2	5	1	0.497	0.401	0.438	1.455	1.423	1.88	3.561	0.00031665	extracellular	GO:0006950 response to stress; GO:0006952 defense response; GO:0008152 metabolic process; GO:0009056 catabolic process; GO:0009605 response to external stimulus; GO:0009607 response to biotic stimulus; GO:0009617 response to bacterium; GO:0009987 cellular process; GO:0016998 cell wall macromolecule catabolic process; GO:0042742 defense response to bacterium; GO:0043170 macromolecule metabolic pro…	GO:0001669 acrosomal vesicle; GO:0005576 extracellular region; GO:0005615 extracellular space; GO:0005622 intracellular; GO:0005623 cell; GO:0005737 cytoplasm; GO:0005886 plasma membrane; GO:0012505 endomembrane system; GO:0016020 membrane; GO:0030141 secretory granule; GO:0031410 cytoplasmic vesicle; GO:0031982 vesicle; GO:0043226 organelle; GO:0043227 membrane-bounded organelle; GO:0043229 intr…	GO:0003796 lysozyme activity; GO:0003824 catalytic activity; GO:0004553 hydrolase activity, hydrolyzing O-glycosyl compounds; GO:0016787 hydrolase activity; GO:0016798 hydrolase activity, acting on glycosyl bonds; GO:0061783 peptidoglycan muralytic activity;				PF00021	u-PAR/Ly-6 domain
F02_transcript_26454	ckma, CK-M, cb51, ckm, mck, wu:fa28d05; creatine kinase, muscle a; K00933 creatine kinase [EC:2.7.3.2] (A)	38.901	12.8	4	4	1	0.52	0.41	0.444	1.599	1.503	1.613	3.432	7.6074e-05	cytoplasm	GO:0006082 organic acid metabolic process; GO:0006520 cellular amino acid metabolic process; GO:0006575 cellular modified amino acid metabolic process; GO:0006599 phosphagen metabolic process; GO:0006600 creatine metabolic process; GO:0006603 phosphocreatine metabolic process; GO:0006793 phosphorus metabolic process; GO:0006796 phosphate-containing compound metabolic process; GO:0006807 nitrogen …	GO:0005576 extracellular region; GO:0005615 extracellular space; GO:0005622 intracellular; GO:0005623 cell; GO:0005737 cytoplasm; GO:0005829 cytosol; GO:0044421 extracellular region part; GO:0044424 intracellular part; GO:0044444 cytoplasmic part; GO:0044464 cell part;	GO:0003824 catalytic activity; GO:0004111 creatine kinase activity; GO:0016301 kinase activity; GO:0016740 transferase activity; GO:0016772 transferase activity, transferring phosphorus-containing groups; GO:0016775 phosphotransferase activity, nitrogenous group as acceptor;	K00933	E2.7.3.2; creatine kinase [EC:2.7.3.2]	dre00330 Arginine and proline metabolism - Danio rerio (zebrafish); dre01100 Metabolic pathways - Danio rerio (zebrafish);	PF02807; PF00217	ATP:guanido phosphotransferase, N-terminal domain; ATP:guanido phosphotransferase, C-terminal catalytic domain	C	KOG3581	Creatine kinases
F02_transcript_25196	TATA-binding protein-associated factor 2N-like; K13098 RNA-binding protein FUS (A)	28.244	4.1	1	2	1	0.421	0.389	0.585	1.809	1.349	1.522	3.355	0.00128219	nucleus	GO:0006139 nucleobase-containing compound metabolic process; GO:0006351 transcription, DNA-templated; GO:0006352 DNA-templated transcription, initiation; GO:0006355 regulation of transcription, DNA-templated; GO:0006366 transcription from RNA polymerase II promoter; GO:0006367 transcription initiation from RNA polymerase II promoter; GO:0006725 cellular aromatic compound metabolic process; GO:000…	GO:0005622 intracellular; GO:0005623 cell; GO:0005634 nucleus; GO:0005654 nucleoplasm; GO:0005737 cytoplasm; GO:0031974 membrane-enclosed lumen; GO:0031981 nuclear lumen; GO:0043226 organelle; GO:0043227 membrane-bounded organelle; GO:0043229 intracellular organelle; GO:0043231 intracellular membrane-bounded organelle; GO:0043233 organelle lumen; GO:0044422 organelle part; GO:0044424 intracellula…		K13098	TLS, FUS; RNA-binding protein FUS				A	KOG1995	Conserved Zn-finger protein
F02_transcript_11605	major histocompatibility complex class I ZE like precursor [Danio rerio]	48.675	1.9	1	1	1	0.66	0.325	0.433	1.267	2.43	1.01	3.319	0.024805	extracellular							PF00129; PF07654	Class I Histocompatibility antigen, domains alpha 1 and 2; Immunoglobulin C1-set domain
F02_transcript_13489	major histocompatibility complex class I UFA precursor [Danio rerio]	26.753	20	4	5	2	0.461	0.453	0.51	1.607	1.518	1.537	3.274	4.1478e-06	plasma membrane							PF00129; PF07654	Class I Histocompatibility antigen, domains alpha 1 and 2; Immunoglobulin C1-set domain
F02_transcript_11887	RecName: Full=Galectin-4; Short=Gal-4; AltName: Full=L-36 lactose-binding protein; Short=L36LBP;AltName: Full=Lactose-binding lectin 4	48.484	37.8	18	46	2	0.531	0.477	0.374	1.448	1.2	1.807	3.224	0.00176118	cytoplasm	GO:0007155 cell adhesion; GO:0022610 biological adhesion;	GO:0005576 extracellular region; GO:0005615 extracellular space; GO:0005622 intracellular; GO:0005623 cell; GO:0005737 cytoplasm; GO:0005829 cytosol; GO:0005886 plasma membrane; GO:0016020 membrane; GO:0044421 extracellular region part; GO:0044424 intracellular part; GO:0044444 cytoplasmic part; GO:0044464 cell part; GO:0071944 cell periphery;	GO:0005488 binding; GO:0016936 galactoside binding; GO:0030246 carbohydrate binding; GO:0097367 carbohydrate derivative binding;				PF00337	Galactoside-binding lectin	W	KOG3587	Galectin, galactose-binding lectin
F02_transcript_23581	TBC1 domain family member 15, partial [Stegodyphus mimosarum]	69.614	1.4	1	2	1	0.476	0.535	0.482	1.204	1.761	1.642	3.086	0.0008049	cytoplasm	GO:0006810 transport; GO:0006886 intracellular protein transport; GO:0008104 protein localization; GO:0015031 protein transport; GO:0015833 peptide transport; GO:0016192 vesicle-mediated transport; GO:0016197 endosomal transport; GO:0016482 cytosolic transport; GO:0031338 regulation of vesicle fusion; GO:0032879 regulation of localization; GO:0033036 macromolecule localization; GO:0033043 regulat…	GO:0005576 extracellular region; GO:0005622 intracellular; GO:0005623 cell; GO:0005737 cytoplasm; GO:0005768 endosome; GO:0005829 cytosol; GO:0012505 endomembrane system; GO:0031410 cytoplasmic vesicle; GO:0031982 vesicle; GO:0043226 organelle; GO:0043227 membrane-bounded organelle; GO:0043229 intracellular organelle; GO:0044424 intracellular part; GO:0044444 cytoplasmic part; GO:0044464 cell par…	GO:0005096 GTPase activator activity; GO:0005488 binding; GO:0005515 protein binding; GO:0008047 enzyme activator activity; GO:0017016 Ras GTPase binding; GO:0017137 Rab GTPase binding; GO:0019899 enzyme binding; GO:0030234 enzyme regulator activity; GO:0030695 GTPase regulator activity; GO:0031267 small GTPase binding; GO:0051020 GTPase binding; GO:0060589 nucleoside-triphosphatase regulator act…	K20168	TBC1D15; TBC1 domain family member 15	dre04137 Mitophagy - animal - Danio rerio (zebrafish);			T	KOG2197	Ypt/Rab-specific GTPase-activating protein GYP7 and related proteins
F02_transcript_14115	keratin, type II cytoskeletal 8-like; K07605 type II keratin, basic (A)	47.818	63.4	42	227	1	0.492	0.492	0.508	1.268	1.593	1.74	3.084	0.0071353	mitochondria				K07605	KRT2; type II keratin, basic
F02_transcript_7061	Allene oxide synthase-lipoxygenase protein [Stylophora pistillata]	90.1	9.1	5	7	1	0.502	0.458	0.554	1.732	1.545	1.287	3.015	0.00042403	cytoplasm	GO:0001676 long-chain fatty acid metabolic process; GO:0006082 organic acid metabolic process; GO:0006629 lipid metabolic process; GO:0006631 fatty acid metabolic process; GO:0006633 fatty acid biosynthetic process; GO:0006636 unsaturated fatty acid biosynthetic process; GO:0006690 icosanoid metabolic process; GO:0008152 metabolic process; GO:0008610 lipid biosynthetic process; GO:0009058 biosynt…	GO:0005622 intracellular; GO:0005623 cell; GO:0005737 cytoplasm; GO:0005829 cytosol; GO:0016020 membrane; GO:0019898 extrinsic component of membrane; GO:0044424 intracellular part; GO:0044425 membrane part; GO:0044444 cytoplasmic part; GO:0044464 cell part;	GO:0003824 catalytic activity; GO:0005488 binding; GO:0005506 iron ion binding; GO:0005509 calcium ion binding; GO:0016491 oxidoreductase activity; GO:0016701 oxidoreductase activity, acting on single donors with incorporation of molecular oxygen; GO:0016702 oxidoreductase activity, acting on single donors with incorporation of molecular oxygen, incorporation of two atoms of oxygen; GO:0043167 io…	K00461	ALOX5; arachidonate 5-lipoxygenase [EC:1.13.11.34]	dre00590 Arachidonic acid metabolism - Danio rerio (zebrafish); dre01100 Metabolic pathways - Danio rerio (zebrafish);	PF00305	Lipoxygenase
F02_transcript_428	lmna, cb948, fk66d12, wu:fk66d12; lamin A; K12641 lamin A/C (A)	73.713	56.6	42	119	1	0.562	0.486	0.473	1.409	1.806	1.359	3.007	0.00046104	nucleus	GO:0000003 reproduction; GO:0000226 microtubule cytoskeleton organization; GO:0000278 mitotic cell cycle; GO:0000280 nuclear division; GO:0000910 cytokinesis; GO:0001654 eye development; GO:0001666 response to hypoxia; GO:0001745 compound eye morphogenesis; GO:0001763 morphogenesis of a branching structure; GO:0002009 morphogenesis of an epithelium; GO:0002682 regulation of immune system process;…	GO:0005622 intracellular; GO:0005623 cell; GO:0005634 nucleus; GO:0005635 nuclear envelope; GO:0005638 lamin filament; GO:0005652 nuclear lamina; GO:0005654 nucleoplasm; GO:0005737 cytoplasm; GO:0005829 cytosol; GO:0005856 cytoskeleton; GO:0005882 intermediate filament; GO:0012505 endomembrane system; GO:0016020 membrane; GO:0016363 nuclear matrix; GO:0031090 organelle membrane; GO:0031965 nuclea…	GO:0005102 receptor binding; GO:0005198 structural molecule activity; GO:0005488 binding; GO:0005515 protein binding; GO:0008157 protein phosphatase 1 binding; GO:0019899 enzyme binding; GO:0019902 phosphatase binding; GO:0019903 protein phosphatase binding; GO:0042393 histone binding; GO:0042802 identical protein binding;	K12641	LMNA; lamin A/C	dre04210 Apoptosis - Danio rerio (zebrafish);	PF00932	Lamin Tail Domain	DY	KOG0977	Nuclear envelope protein lamin, intermediate filament superfamily
F02_transcript_3493	alpha-aminoadipic semialdehyde synthase, mitochondrial-like; K14157 alpha-aminoadipic semialdehyde synthase [EC:1.5.1.8 1.5.1.9] (A)	68.624	8.9	3	4	3	0.325	0.495	0.506	1.302	1.324	1.292	2.955	0.0166754	cytoplasm,nucleus	GO:0006082 organic acid metabolic process; GO:0006091 generation of precursor metabolites and energy; GO:0006520 cellular amino acid metabolic process; GO:0006553 lysine metabolic process; GO:0006554 lysine catabolic process; GO:0006807 nitrogen compound metabolic process; GO:0008152 metabolic process; GO:0008652 cellular amino acid biosynthetic process; GO:0009056 catabolic process; GO:0009058 b…	GO:0005622 intracellular; GO:0005623 cell; GO:0005737 cytoplasm; GO:0005739 mitochondrion; GO:0005759 mitochondrial matrix; GO:0031974 membrane-enclosed lumen; GO:0043226 organelle; GO:0043227 membrane-bounded organelle; GO:0043229 intracellular organelle; GO:0043231 intracellular membrane-bounded organelle; GO:0043233 organelle lumen; GO:0044422 organelle part; GO:0044424 intracellular part; GO:…	GO:0003824 catalytic activity; GO:0004753 saccharopine dehydrogenase activity; GO:0016491 oxidoreductase activity; GO:0016645 oxidoreductase activity, acting on the CH-NH group of donors; GO:0016646 oxidoreductase activity, acting on the CH-NH group of donors, NAD or NADP as acceptor; GO:0047130 saccharopine dehydrogenase (NADP+, L-lysine-forming) activity; GO:0047131 saccharopine dehydrogenase (…	K14157	AASS; alpha-aminoadipic semialdehyde synthase [EC:1.5.1.8 1.5.1.9]	dre00310 Lysine degradation - Danio rerio (zebrafish); dre01100 Metabolic pathways - Danio rerio (zebrafish);	PF01262	Alanine dehydrogenase/PNT, C-terminal domain	E	KOG0172	Lysine-ketoglutarate reductase/saccharopine dehydrogenase
F02_transcript_16162	major histocompatibility complex class I UFA precursor [Danio rerio]	39.417	19.3	5	9	1		0.492	0.457	1.227	1.638	1.269	2.904	0.0031408	extracellular							PF00129; PF07654	Class I Histocompatibility antigen, domains alpha 1 and 2; Immunoglobulin C1-set domain
F02_transcript_8033	Capn1, fj67g01, wu:fj67g01; zgc:55262 (EC:3.4.22.17); K01367 calpain-1 [EC:3.4.22.52] (A)	79.796	39.9	27	68	3	0.61	0.305	0.662	1.372	1.808	1.339	2.866	0.014144	nucleus	GO:0000003 reproduction; GO:0000768 syncytium formation by plasma membrane fusion; GO:0001667 ameboidal-type cell migration; GO:0001775 cell activation; GO:0002064 epithelial cell development; GO:0002065 columnar/cuboidal epithelial cell differentiation; GO:0002066 columnar/cuboidal epithelial cell development; GO:0002252 immune effector process; GO:0002263 cell activation involved in immune resp…	GO:0000323 lytic vacuole; GO:0005576 extracellular region; GO:0005622 intracellular; GO:0005623 cell; GO:0005737 cytoplasm; GO:0005739 mitochondrion; GO:0005764 lysosome; GO:0005773 vacuole; GO:0005829 cytosol; GO:0005856 cytoskeleton; GO:0005886 plasma membrane; GO:0012505 endomembrane system; GO:0015629 actin cytoskeleton; GO:0016020 membrane; GO:0030141 secretory granule; GO:0031410 cytoplasmi…	GO:0003824 catalytic activity; GO:0004175 endopeptidase activity; GO:0004197 cysteine-type endopeptidase activity; GO:0004198 calcium-dependent cysteine-type endopeptidase activity; GO:0005488 binding; GO:0005509 calcium ion binding; GO:0005515 protein binding; GO:0008092 cytoskeletal protein binding; GO:0008233 peptidase activity; GO:0008234 cysteine-type peptidase activity; GO:0016787 hydrolase…	K01367	CAPN1; calpain-1 [EC:3.4.22.52]	dre04141 Protein processing in endoplasmic reticulum - Danio rerio (zebrafish); dre04210 Apoptosis - Danio rerio (zebrafish); dre04217 Necroptosis - Danio rerio (zebrafish); dre04218 Cellular senescence - Danio rerio (zebrafish);	PF01067; PF13833; PF13202	Calpain large subunit, domain III; EF-hand domain pair; EF hand	OT	KOG0045	Cytosolic Ca2+-dependent cysteine protease (calpain), large subunit (EF-Hand protein superfamily)
F02_transcript_17237	aass; aminoadipate-semialdehyde synthase; K14157 alpha-aminoadipic semialdehyde synthase [EC:1.5.1.8 1.5.1.9] (A)	21.381	21.2	4	6	4	0.488	0.519	0.596	1.368	1.642	1.429	2.769	0.00022363	cytoplasm	GO:0006082 organic acid metabolic process; GO:0006091 generation of precursor metabolites and energy; GO:0006520 cellular amino acid metabolic process; GO:0006553 lysine metabolic process; GO:0006554 lysine catabolic process; GO:0006807 nitrogen compound metabolic process; GO:0008152 metabolic process; GO:0008652 cellular amino acid biosynthetic process; GO:0009056 catabolic process; GO:0009058 b…	GO:0005622 intracellular; GO:0005623 cell; GO:0005737 cytoplasm; GO:0005739 mitochondrion; GO:0005759 mitochondrial matrix; GO:0031974 membrane-enclosed lumen; GO:0043226 organelle; GO:0043227 membrane-bounded organelle; GO:0043229 intracellular organelle; GO:0043231 intracellular membrane-bounded organelle; GO:0043233 organelle lumen; GO:0044422 organelle part; GO:0044424 intracellular part; GO:…	GO:0003824 catalytic activity; GO:0004753 saccharopine dehydrogenase activity; GO:0016491 oxidoreductase activity; GO:0016645 oxidoreductase activity, acting on the CH-NH group of donors; GO:0016646 oxidoreductase activity, acting on the CH-NH group of donors, NAD or NADP as acceptor; GO:0047130 saccharopine dehydrogenase (NADP+, L-lysine-forming) activity; GO:0047131 saccharopine dehydrogenase (…	K14157	AASS; alpha-aminoadipic semialdehyde synthase [EC:1.5.1.8 1.5.1.9]	dre00310 Lysine degradation - Danio rerio (zebrafish); dre01100 Metabolic pathways - Danio rerio (zebrafish);			E	KOG0172	Lysine-ketoglutarate reductase/saccharopine dehydrogenase
F02_transcript_20906	galectin-3-binding protein precursor [Mus musculus]	65.303	3.7	2	2	2	0.5	0.479	0.64	1.398	1.495	1.568	2.755	0.00044351	extracellular	GO:0002576 platelet degranulation; GO:0006810 transport; GO:0006887 exocytosis; GO:0006897 endocytosis; GO:0006898 receptor-mediated endocytosis; GO:0006950 response to stress; GO:0006952 defense response; GO:0006968 cellular defense response; GO:0007154 cell communication; GO:0007165 signal transduction; GO:0009987 cellular process; GO:0016192 vesicle-mediated transport; GO:0023052 signaling; GO…	GO:0005576 extracellular region; GO:0005615 extracellular space; GO:0005622 intracellular; GO:0005623 cell; GO:0005737 cytoplasm; GO:0012505 endomembrane system; GO:0030141 secretory granule; GO:0031089 platelet dense granule lumen; GO:0031410 cytoplasmic vesicle; GO:0031974 membrane-enclosed lumen; GO:0031982 vesicle; GO:0031983 vesicle lumen; GO:0034774 secretory granule lumen; GO:0042827 plate…	GO:0005044 scavenger receptor activity; GO:0038024 cargo receptor activity;	K17300	LGALS3BP; galectin-3-binding protein		PF00530; PF07707	Scavenger receptor cysteine-rich domain; BTB And C-terminal Kelch
F02_transcript_3335	cell surface A33 antigen-like; K06790 cell surface A33 antigen (A)	48.974	25.6	10	20	3	0.658	0.487	0.54	1.32	1.573	1.51	2.613	0.00071995	plasma membrane	GO:0007154 cell communication; GO:0007165 signal transduction; GO:0009987 cellular process; GO:0023052 signaling; GO:0050789 regulation of biological process; GO:0050794 regulation of cellular process; GO:0050896 response to stimulus; GO:0051716 cellular response to stimulus; GO:0065007 biological regulation;	GO:0005623 cell; GO:0005886 plasma membrane; GO:0005887 integral component of plasma membrane; GO:0016020 membrane; GO:0016021 integral component of membrane; GO:0031224 intrinsic component of membrane; GO:0031226 intrinsic component of plasma membrane; GO:0044425 membrane part; GO:0044459 plasma membrane part; GO:0044464 cell part; GO:0071944 cell periphery;	GO:0038023 signaling receptor activity; GO:0060089 molecular transducer activity;				PF07686; PF13927	Immunoglobulin V-set domain; Immunoglobulin domain
F02_transcript_6	mucin-2 precursor [Gallus gallus]	321.89	1.5	4	4	4	0.536	0.477	0.731	1.098	1.79	1.459	2.493	0.0087982	extracellular							PF08742	C8 domain	VW	KOG1216	von Willebrand factor and related coagulation proteins
F02_transcript_157	Uncharacterized protein	198.14	3	4	4	4	0.542	0.524	0.636	1.286	1.338	1.537	2.445	0.00037707	nucleus
F02_transcript_21782	nephronectin-like; K06824 nephronectin (A)	63.466	1.7	1	1	1	0.417	0.647	0.698	1.382	1.399	1.523	2.443	0.004964	extracellular	GO:0001655 urogenital system development; GO:0001657 ureteric bud development; GO:0001658 branching involved in ureteric bud morphogenesis; GO:0001763 morphogenesis of a branching structure; GO:0001822 kidney development; GO:0001823 mesonephros development; GO:0001932 regulation of protein phosphorylation; GO:0001934 positive regulation of protein phosphorylation; GO:0002009 morphogenesis of an e…	GO:0005576 extracellular region; GO:0005604 basement membrane; GO:0005622 intracellular; GO:0005623 cell; GO:0005737 cytoplasm; GO:0030485 smooth muscle contractile fiber; GO:0031012 extracellular matrix; GO:0043226 organelle; GO:0043228 non-membrane-bounded organelle; GO:0043229 intracellular organelle; GO:0043232 intracellular non-membrane-bounded organelle; GO:0043292 contractile fiber; GO:004…	GO:0005102 receptor binding; GO:0005178 integrin binding; GO:0005488 binding; GO:0005515 protein binding; GO:0044877 macromolecular complex binding; GO:0050839 cell adhesion molecule binding;	K06824	NPNT; nephronectin	dre04512 ECM-receptor interaction - Danio rerio (zebrafish);	PF07645; PF00629	Calcium-binding EGF domain; MAM domain	T	KOG1217	Fibrillins and related proteins containing Ca2+-binding EGF-like domains
F02_transcript_17675	major histocompatibility complex class I UFA precursor [Danio rerio]	42.264	11.7	4	8	1	0.621	0.491	0.665	1.259	0.972	2.06	2.415	0.024457	peroxisome							PF00129; PF07654	Class I Histocompatibility antigen, domains alpha 1 and 2; Immunoglobulin C1-set domain
F02_transcript_28301	cytosolic 5'-nucleotidase 1A-like; K01081 5'-nucleotidase [EC:3.1.3.5] (A)	35.213	14.2	4	6	2	0.535	0.634	0.674	1.239	1.359	1.637	2.298	0.00149882	cytoplasm	GO:0006139 nucleobase-containing compound metabolic process; GO:0006163 purine nucleotide metabolic process; GO:0006195 purine nucleotide catabolic process; GO:0006725 cellular aromatic compound metabolic process; GO:0006753 nucleoside phosphate metabolic process; GO:0006793 phosphorus metabolic process; GO:0006796 phosphate-containing compound metabolic process; GO:0006807 nitrogen compound meta…	GO:0005622 intracellular; GO:0005623 cell; GO:0005737 cytoplasm; GO:0005829 cytosol; GO:0044424 intracellular part; GO:0044444 cytoplasmic part; GO:0044464 cell part;	GO:0003824 catalytic activity; GO:0008252 nucleotidase activity; GO:0008253 5'-nucleotidase activity; GO:0016787 hydrolase activity; GO:0016788 hydrolase activity, acting on ester bonds; GO:0016791 phosphatase activity; GO:0042578 phosphoric ester hydrolase activity;	K01081	E3.1.3.5; 5'-nucleotidase [EC:3.1.3.5]	dre00230 Purine metabolism - Danio rerio (zebrafish); dre00240 Pyrimidine metabolism - Danio rerio (zebrafish); dre00760 Nicotinate and nicotinamide metabolism - Danio rerio (zebrafish); dre01100 Metabolic pathways - Danio rerio (zebrafish);
F02_transcript_11085	Uncharacterized protein	27.728	16.4	3	4	2	0.625	0.598	0.567	1.609	1.091	1.395	2.288	0.0022193	plasma membrane	GO:0001775 cell activation; GO:0001817 regulation of cytokine production; GO:0001819 positive regulation of cytokine production; GO:0002252 immune effector process; GO:0002263 cell activation involved in immune response; GO:0002274 myeloid leukocyte activation; GO:0002275 myeloid cell activation involved in immune response; GO:0002283 neutrophil activation involved in immune response; GO:0002366 …	GO:0005622 intracellular; GO:0005623 cell; GO:0005737 cytoplasm; GO:0005886 plasma membrane; GO:0005887 integral component of plasma membrane; GO:0009986 cell surface; GO:0012505 endomembrane system; GO:0012506 vesicle membrane; GO:0016020 membrane; GO:0016021 integral component of membrane; GO:0030141 secretory granule; GO:0030659 cytoplasmic vesicle membrane; GO:0030667 secretory granule membra…	GO:0005102 receptor binding; GO:0005488 binding; GO:0005515 protein binding;
F02_transcript_4748	RecName: Full=Galectin-4; Short=Gal-4; AltName: Full=L-36 lactose-binding protein; Short=L36LBP;AltName: Full=Lactose-binding lectin 4	118.27	30.5	32	120	12	0.624	0.606	0.627	1.329	1.513	1.401	2.285	2.4949e-05	cytoplasm	GO:0007155 cell adhesion; GO:0022610 biological adhesion;	GO:0005576 extracellular region; GO:0005615 extracellular space; GO:0005622 intracellular; GO:0005623 cell; GO:0005737 cytoplasm; GO:0005829 cytosol; GO:0005886 plasma membrane; GO:0016020 membrane; GO:0044421 extracellular region part; GO:0044424 intracellular part; GO:0044444 cytoplasmic part; GO:0044464 cell part; GO:0071944 cell periphery;	GO:0005488 binding; GO:0016936 galactoside binding; GO:0030246 carbohydrate binding; GO:0097367 carbohydrate derivative binding;				PF00337	Galactoside-binding lectin	W	KOG3587	Galectin, galactose-binding lectin
F02_transcript_6573	hook1, si:dkey-183n20.14; hook microtubule-tethering protein 1; K16612 protein HOOK1 (A)	82.687	3.2	3	3	3	0.598	0.611	0.639	1.623	1.178	1.408	2.278	0.00100181	cytoplasm	GO:0000226 microtubule cytoskeleton organization; GO:0006810 transport; GO:0006996 organelle organization; GO:0007010 cytoskeleton organization; GO:0007017 microtubule-based process; GO:0007032 endosome organization; GO:0007033 vacuole organization; GO:0007034 vacuolar transport; GO:0007040 lysosome organization; GO:0007041 lysosomal transport; GO:0008333 endosome to lysosome transport; GO:000998…	GO:0005622 intracellular; GO:0005623 cell; GO:0005737 cytoplasm; GO:0005813 centrosome; GO:0005815 microtubule organizing center; GO:0005856 cytoskeleton; GO:0015630 microtubule cytoskeleton; GO:0032991 macromolecular complex; GO:0043226 organelle; GO:0043228 non-membrane-bounded organelle; GO:0043229 intracellular organelle; GO:0043232 intracellular non-membrane-bounded organelle; GO:0044422 org…	GO:0005488 binding; GO:0005515 protein binding; GO:0008017 microtubule binding; GO:0008092 cytoskeletal protein binding; GO:0015631 tubulin binding; GO:0051959 dynein light intermediate chain binding;	K16612	HOOK1; protein HOOK1
F02_transcript_6830	Uncharacterized protein	40.572	41.8	15	37	2	0.612	0.57	0.709	1.371	1.359	1.446	2.208	0.00028467	cytoplasm							PF13402	Peptidase M60-like family
F02_transcript_4	mucin-5AC-like [Stylophora pistillata]	327.65	14.1	34	43	25	0.674	0.613	0.653	1.317	1.589	1.36	2.199	0.00025925	plasma membrane							PF08742; PF01826; PF12714	C8 domain; Trypsin Inhibitor like cysteine rich domain; TILa domain	VW	KOG1216	von Willebrand factor and related coagulation proteins
F02_transcript_14264	akr1a1b, akr1a1, zgc:110225; aldo-keto reductase family 1, member A1b (aldehyde reductase) (EC:1.1.1.2); K00002 alcohol dehydrogenase (NADP+) [EC:1.1.1.2] (A)	20.155	44.1	6	7	1	0.313	1.017	0.646	1.255	1.653	1.178	2.068	0.082844	mitochondria	GO:0005975 carbohydrate metabolic process; GO:0005996 monosaccharide metabolic process; GO:0006006 glucose metabolic process; GO:0006063 uronic acid metabolic process; GO:0006064 glucuronate catabolic process; GO:0006081 cellular aldehyde metabolic process; GO:0006082 organic acid metabolic process; GO:0006091 generation of precursor metabolites and energy; GO:0006732 coenzyme metabolic process; …	GO:0005622 intracellular; GO:0005623 cell; GO:0005737 cytoplasm; GO:0005829 cytosol; GO:0005886 plasma membrane; GO:0016020 membrane; GO:0016324 apical plasma membrane; GO:0044424 intracellular part; GO:0044425 membrane part; GO:0044444 cytoplasmic part; GO:0044459 plasma membrane part; GO:0044464 cell part; GO:0045177 apical part of cell; GO:0071944 cell periphery; GO:0098590 plasma membrane reg…	GO:0003824 catalytic activity; GO:0004032 alditol:NADP+ 1-oxidoreductase activity; GO:0004033 aldo-keto reductase (NADP) activity; GO:0008106 alcohol dehydrogenase (NADP+) activity; GO:0009055 electron carrier activity; GO:0016491 oxidoreductase activity; GO:0016614 oxidoreductase activity, acting on CH-OH group of donors; GO:0016616 oxidoreductase activity, acting on the CH-OH group of donors, N…	K00002	AKR1A1, adh; alcohol dehydrogenase (NADP+) [EC:1.1.1.2]	dre00010 Glycolysis / Gluconeogenesis - Danio rerio (zebrafish); dre00040 Pentose and glucuronate interconversions - Danio rerio (zebrafish); dre00561 Glycerolipid metabolism - Danio rerio (zebrafish); dre01100 Metabolic pathways - Danio rerio (zebrafish);	PF00248	Aldo/keto reductase family	S	KOG1577	Aldo/keto reductase family proteins
F02_transcript_12544	interferon-induced protein with tetratricopeptide repeats 2, partial [Bos taurus]	45.762	35.5	13	20	8	0.686	0.659	0.642	1.374	1.249	1.454	2.052	0.000120168	nucleus									S	KOG1124	FOG: TPR repeat
F02_transcript_23618	zinc finger protein 2 homolog, partial [Bos taurus]	28.991	4.4	1	1	1	0.798	0.74	0.472	1.294	1.424	1.343	2.02	0.0118984	nucleus							PF00096	Zinc finger, C2H2 type
F02_transcript_25433	Uncharacterized protein	14.059	18.3	2	2	2	0.848	0.644	0.437	1.52	1.248	1.114	2.012	0.026815	nucleus				K12396	AP3D; AP-3 complex subunit delta	dre04142 Lysosome - Danio rerio (zebrafish);
F02_transcript_29807	fatty acid-binding protein, liver [Gallus gallus]	14.194	71.4	6	66	6	0.656	0.673	0.674	1.235	1.451	1.314	1.997	0.000136877	cytoplasm		GO:0005622 intracellular; GO:0005623 cell; GO:0005737 cytoplasm; GO:0044424 intracellular part; GO:0044464 cell part;	GO:0005488 binding; GO:0031406 carboxylic acid binding; GO:0032052 bile acid binding; GO:0033293 monocarboxylic acid binding; GO:0036094 small molecule binding; GO:0043167 ion binding; GO:0043168 anion binding; GO:0043177 organic acid binding;						I	KOG4015	Fatty acid-binding protein FABP
F02_transcript_15905	sodium/hydrogen exchanger 1-like; K05742 solute carrier family 9 (sodium/hydrogen exchanger), member 1 (A)	12.548	8.5	1	2	1	0.781	0.678	0.587	0.775	2.306	0.978	1.984	0.167305	extracellular	GO:0001558 regulation of cell growth; GO:0001666 response to hypoxia; GO:0001952 regulation of cell-matrix adhesion; GO:0002026 regulation of the force of heart contraction; GO:0002028 regulation of sodium ion transport; GO:0003008 system process; GO:0003012 muscle system process; GO:0003013 circulatory system process; GO:0003015 heart process; GO:0006022 aminoglycan metabolic process; GO:0006026…	GO:0005622 intracellular; GO:0005623 cell; GO:0005634 nucleus; GO:0005654 nucleoplasm; GO:0005737 cytoplasm; GO:0005739 mitochondrion; GO:0005783 endoplasmic reticulum; GO:0005789 endoplasmic reticulum membrane; GO:0005886 plasma membrane; GO:0005887 integral component of plasma membrane; GO:0005911 cell-cell junction; GO:0009986 cell surface; GO:0012505 endomembrane system; GO:0014704 intercalat…	GO:0005198 structural molecule activity; GO:0005215 transporter activity; GO:0005451 monovalent cation:proton antiporter activity; GO:0005488 binding; GO:0005515 protein binding; GO:0005543 phospholipid binding; GO:0005546 phosphatidylinositol-4,5-bisphosphate binding; GO:0008289 lipid binding; GO:0008324 cation transmembrane transporter activity; GO:0015075 ion transmembrane transporter activity…	K05742	SLC9A1, NHE1; solute carrier family 9 (sodium/hydrogen exchanger), member 1	dre04260 Cardiac muscle contraction - Danio rerio (zebrafish); dre04261 Adrenergic signaling in cardiomyocytes - Danio rerio (zebrafish); dre04371 Apelin signaling pathway - Danio rerio (zebrafish); dre04810 Regulation of actin cytoskeleton - Danio rerio (zebrafish);			P	KOG1966	Sodium/hydrogen exchanger protein
F02_transcript_21489	cep70, si:dkey-170g11.4; centrosomal protein 70; K16802 centrosomal protein CEP70 (A)	70.597	3.4	2	2	2	0.606	0.803	0.628	1.28	1.547	1.202	1.978	0.0042014	nucleus	GO:0000086 G2/M transition of mitotic cell cycle; GO:0000278 mitotic cell cycle; GO:0006996 organelle organization; GO:0007049 cell cycle; GO:0007346 regulation of mitotic cell cycle; GO:0009987 cellular process; GO:0010389 regulation of G2/M transition of mitotic cell cycle; GO:0010564 regulation of cell cycle process; GO:0016043 cellular component organization; GO:0022402 cell cycle process; GO…	GO:0005622 intracellular; GO:0005623 cell; GO:0005634 nucleus; GO:0005635 nuclear envelope; GO:0005654 nucleoplasm; GO:0005737 cytoplasm; GO:0005813 centrosome; GO:0005815 microtubule organizing center; GO:0005829 cytosol; GO:0005856 cytoskeleton; GO:0012505 endomembrane system; GO:0015630 microtubule cytoskeleton; GO:0016020 membrane; GO:0031090 organelle membrane; GO:0031965 nuclear membrane; G…	GO:0005488 binding; GO:0005515 protein binding; GO:0042802 identical protein binding;	K16802	CEP70; centrosomal protein CEP70
F02_transcript_16869	L-lactate dehydrogenase A chain-like; K00016 L-lactate dehydrogenase [EC:1.1.1.27] (A)	36.495	3.9	1	1	1	0.689	0.672	0.683	1.446	1.041	1.52	1.96	0.031018	plasma membrane	GO:0000302 response to reactive oxygen species; GO:0000768 syncytium formation by plasma membrane fusion; GO:0001666 response to hypoxia; GO:0005975 carbohydrate metabolic process; GO:0005996 monosaccharide metabolic process; GO:0006006 glucose metabolic process; GO:0006007 glucose catabolic process; GO:0006082 organic acid metabolic process; GO:0006089 lactate metabolic process; GO:0006090 pyruv…	GO:0005622 intracellular; GO:0005623 cell; GO:0005737 cytoplasm; GO:0005739 mitochondrion; GO:0005759 mitochondrial matrix; GO:0005829 cytosol; GO:0005929 cilium; GO:0031514 motile cilium; GO:0031974 membrane-enclosed lumen; GO:0035686 sperm fibrous sheath; GO:0036126 sperm flagellum; GO:0042995 cell projection; GO:0043226 organelle; GO:0043227 membrane-bounded organelle; GO:0043229 intracellular…	GO:0000166 nucleotide binding; GO:0003824 catalytic activity; GO:0004457 lactate dehydrogenase activity; GO:0004459 L-lactate dehydrogenase activity; GO:0005488 binding; GO:0005515 protein binding; GO:0016491 oxidoreductase activity; GO:0016614 oxidoreductase activity, acting on CH-OH group of donors; GO:0016616 oxidoreductase activity, acting on the CH-OH group of donors, NAD or NADP as acceptor…	K00016	LDH, ldh; L-lactate dehydrogenase [EC:1.1.1.27]	dre00010 Glycolysis / Gluconeogenesis - Danio rerio (zebrafish); dre00270 Cysteine and methionine metabolism - Danio rerio (zebrafish); dre00620 Pyruvate metabolism - Danio rerio (zebrafish); dre00640 Propanoate metabolism - Danio rerio (zebrafish); dre01100 Metabolic pathways - Danio rerio (zebrafish);	PF02866	lactate/malate dehydrogenase, alpha/beta C-terminal domain	C	KOG1495	Lactate dehydrogenase
F02_transcript_1	Protein translocase subunit SecA [Stylophora pistillata]	153.57	36.1	52	192	52	0.693	0.686	0.662	1.264	1.393	1.325	1.951	2.4274e-05	nucleus							PF07517	SecA DEAD-like domain
F02_transcript_14379	signal transducer and activator of transcription 1-like; K11220 signal transducer and activator of transcription 1 (A)	74.331	29.4	16	23	6	0.692	0.617	0.731	1.359	1.21	1.338	1.915	0.00045973	cytoplasm	GO:0000122 negative regulation of transcription from RNA polymerase II promoter; GO:0001655 urogenital system development; GO:0001656 metanephros development; GO:0001817 regulation of cytokine production; GO:0001819 positive regulation of cytokine production; GO:0001822 kidney development; GO:0001936 regulation of endothelial cell proliferation; GO:0001937 negative regulation of endothelial cell …	GO:0000228 nuclear chromosome; GO:0000785 chromatin; GO:0000790 nuclear chromatin; GO:0005622 intracellular; GO:0005623 cell; GO:0005634 nucleus; GO:0005654 nucleoplasm; GO:0005694 chromosome; GO:0005730 nucleolus; GO:0005737 cytoplasm; GO:0005829 cytosol; GO:0030424 axon; GO:0030425 dendrite; GO:0031974 membrane-enclosed lumen; GO:0031981 nuclear lumen; GO:0032991 macromolecular complex; GO:0036…	GO:0000976 transcription regulatory region sequence-specific DNA binding; GO:0000977 RNA polymerase II regulatory region sequence-specific DNA binding; GO:0000978 RNA polymerase II core promoter proximal region sequence-specific DNA binding; GO:0000979 RNA polymerase II core promoter sequence-specific DNA binding; GO:0000981 RNA polymerase II transcription factor activity, sequence-specific DNA b…	K11220	STAT1; signal transducer and activator of transcription 1	dre04217 Necroptosis - Danio rerio (zebrafish); dre04620 Toll-like receptor signaling pathway - Danio rerio (zebrafish); dre04621 NOD-like receptor signaling pathway - Danio rerio (zebrafish); dre04625 C-type lectin receptor signaling pathway - Danio rerio (zebrafish); dre04933 AGE-RAGE signaling pathway in diabetic complications - Danio rerio (zebrafish); dre05168 Herpes simplex virus 1 infectio…	PF02864; PF00017; PF12162	STAT protein, DNA binding domain; SH2 domain; STAT1 TAZ2 binding domain	K	KOG3667	STAT protein
F02_transcript_13876	Allene oxide synthase-lipoxygenase protein [Stylophora pistillata]	47.799	12.9	4	5	4	0.713	0.661	0.705	1.389	1.155	1.376	1.886	0.00060473	mitochondria							PF00305	Lipoxygenase
F02_transcript_27099	mhc2a, a4; major histocompatibility complex class II integral membrane alpha chain gene; K06752 major histocompatibility complex, class II (A)	7.8597	20.6	1	1	1	0.873	0.61	0.623	1.247	1.375	1.341	1.882	0.0057397	cytoplasm				K06752	MHC2; major histocompatibility complex, class II	dre04145 Phagosome - Danio rerio (zebrafish); dre04514 Cell adhesion molecules (CAMs) - Danio rerio (zebrafish); dre04672 Intestinal immune network for IgA production - Danio rerio (zebrafish); dre05168 Herpes simplex virus 1 infection - Danio rerio (zebrafish);	PF00993	Class II histocompatibility antigen, alpha domain
F02_transcript_30243	protein S100-A6 [Sus scrofa]	11.013	60	10	33	1	0.63	0.738	0.756	1.361	1.355	1.215	1.851	0.00082171	cytoplasm							PF01023	S-100/ICaBP type calcium binding domain
F02_transcript_4015	MORC family CW-type zinc finger protein 3-like [Stylophora pistillata]	108.03	8.2	5	7	3	0.696	0.694	0.735	1.386	1.31	1.234	1.849	8.4626e-05	cytoplasm							PF13589; PF07496	Histidine kinase-, DNA gyrase B-, and HSP90-like ATPase; CW-type Zinc Finger	D	KOG1845	MORC family ATPases
F02_transcript_28782	Uncharacterized protein	20.502	52.9	8	32	1	0.626	0.743	0.76	1.587	0.986	1.359	1.847	0.0173798	cytoplasm	GO:0006950 response to stress; GO:0006952 defense response; GO:0009605 response to external stimulus; GO:0009607 response to biotic stimulus; GO:0009617 response to bacterium; GO:0042742 defense response to bacterium; GO:0043207 response to external biotic stimulus; GO:0050830 defense response to Gram-positive bacterium; GO:0050896 response to stimulus; GO:0051704 multi-organism process; GO:00517…	GO:0005576 extracellular region;	GO:0003796 lysozyme activity; GO:0003824 catalytic activity; GO:0004553 hydrolase activity, hydrolyzing O-glycosyl compounds; GO:0016787 hydrolase activity; GO:0016798 hydrolase activity, acting on glycosyl bonds; GO:0061783 peptidoglycan muralytic activity;				PF01464	Transglycosylase SLT domain
F02_transcript_21095	profilin-2-like; K05759 profilin (A)	15.121	9.4	1	1	1	0.703	0.629	0.806	0.79	1.363	1.784	1.841	0.088135	cytoplasm	GO:0001505 regulation of neurotransmitter levels; GO:0001932 regulation of protein phosphorylation; GO:0001934 positive regulation of protein phosphorylation; GO:0008064 regulation of actin polymerization or depolymerization; GO:0009893 positive regulation of metabolic process; GO:0009987 cellular process; GO:0010562 positive regulation of phosphorus metabolic process; GO:0010604 positive regulat…	GO:0005622 intracellular; GO:0005623 cell; GO:0005737 cytoplasm; GO:0005829 cytosol; GO:0005856 cytoskeleton; GO:0030424 axon; GO:0033267 axon part; GO:0042995 cell projection; GO:0043005 neuron projection; GO:0043195 terminal bouton; GO:0043226 organelle; GO:0043228 non-membrane-bounded organelle; GO:0043229 intracellular organelle; GO:0043232 intracellular non-membrane-bounded organelle; GO:004…	GO:0003779 actin binding; GO:0003785 actin monomer binding; GO:0003824 catalytic activity; GO:0005488 binding; GO:0005515 protein binding; GO:0005543 phospholipid binding; GO:0005546 phosphatidylinositol-4,5-bisphosphate binding; GO:0008092 cytoskeletal protein binding; GO:0008289 lipid binding; GO:0016462 pyrophosphatase activity; GO:0016787 hydrolase activity; GO:0016817 hydrolase activity, act…	K05759	PFN; profilin	dre04810 Regulation of actin cytoskeleton - Danio rerio (zebrafish); dre05132 Salmonella infection - Danio rerio (zebrafish);	PF00235	Profilin	Z	KOG1755	Profilin
F02_transcript_27438	intl2; intelectin 2; K17527 intelectin (A)	34.704	10.3	2	4	2	0.746	0.593	0.785	1.251	1.42	1.196	1.821	0.0038566	extracellular	GO:0001932 regulation of protein phosphorylation; GO:0001934 positive regulation of protein phosphorylation; GO:0002376 immune system process; GO:0006955 immune response; GO:0006959 humoral immune response; GO:0009605 response to external stimulus; GO:0009607 response to biotic stimulus; GO:0009624 response to nematode; GO:0009893 positive regulation of metabolic process; GO:0009987 cellular proc…	GO:0005576 extracellular region; GO:0005623 cell; GO:0005886 plasma membrane; GO:0005903 brush border; GO:0016020 membrane; GO:0031253 cell projection membrane; GO:0031526 brush border membrane; GO:0032991 macromolecular complex; GO:0042995 cell projection; GO:0043235 receptor complex; GO:0044425 membrane part; GO:0044459 plasma membrane part; GO:0044463 cell projection part; GO:0044464 cell part…	GO:0005488 binding; GO:0005509 calcium ion binding; GO:0005515 protein binding; GO:0030246 carbohydrate binding; GO:0042802 identical protein binding; GO:0043167 ion binding; GO:0043169 cation binding; GO:0046872 metal ion binding; GO:0070492 oligosaccharide binding;	K17527	ITLN; intelectin
F02_transcript_29861	fatty acid-binding protein, heart [Bubalus bubalis]	15.122	11.9	1	1	1	0.779	0.531	0.84	1.182	1.437	1.295	1.82	0.0157843	cytoplasm	GO:0001816 cytokine production; GO:0001932 regulation of protein phosphorylation; GO:0001933 negative regulation of protein phosphorylation; GO:0003008 system process; GO:0006082 organic acid metabolic process; GO:0006355 regulation of transcription, DNA-templated; GO:0006469 negative regulation of protein kinase activity; GO:0006629 lipid metabolic process; GO:0006631 fatty acid metabolic proces…	GO:0005622 intracellular; GO:0005623 cell; GO:0005634 nucleus; GO:0005654 nucleoplasm; GO:0005737 cytoplasm; GO:0005811 lipid particle; GO:0005829 cytosol; GO:0031974 membrane-enclosed lumen; GO:0031981 nuclear lumen; GO:0043226 organelle; GO:0043227 membrane-bounded organelle; GO:0043228 non-membrane-bounded organelle; GO:0043229 intracellular organelle; GO:0043231 intracellular membrane-bounded…	GO:0005102 receptor binding; GO:0005215 transporter activity; GO:0005319 lipid transporter activity; GO:0005324 long-chain fatty acid transporter activity; GO:0005488 binding; GO:0005504 fatty acid binding; GO:0005515 protein binding; GO:0008289 lipid binding; GO:0031406 carboxylic acid binding; GO:0033293 monocarboxylic acid binding; GO:0036041 long-chain fatty acid binding; GO:0036094 small mol…				PF00061	Lipocalin / cytosolic fatty-acid binding protein family	I	KOG4015	Fatty acid-binding protein FABP
F02_transcript_14731	keratin, type II cytoskeletal 8-like; K07605 type II keratin, basic (A)	53.254	59.6	48	784	1	0.86	0.639	0.621	1.601	1.043	1.21	1.818	0.022096	nucleus	GO:0000003 reproduction; GO:0000902 cell morphogenesis; GO:0000904 cell morphogenesis involved in differentiation; GO:0001101 response to acid chemical; GO:0001701 in utero embryonic development; GO:0001890 placenta development; GO:0001892 embryonic placenta development; GO:0003006 developmental process involved in reproduction; GO:0006915 apoptotic process; GO:0006950 response to stress; GO:0006…	GO:0005622 intracellular; GO:0005623 cell; GO:0005737 cytoplasm; GO:0005829 cytosol; GO:0005856 cytoskeleton; GO:0005882 intermediate filament; GO:0005886 plasma membrane; GO:0005911 cell-cell junction; GO:0016010 dystrophin-associated glycoprotein complex; GO:0016020 membrane; GO:0016327 apicolateral plasma membrane; GO:0030016 myofibril; GO:0030017 sarcomere; GO:0030018 Z disc; GO:0030054 cell …	GO:0005488 binding; GO:0005515 protein binding; GO:0044877 macromolecular complex binding; GO:0097110 scaffold protein binding;	K07605	KRT2; type II keratin, basic
F02_transcript_29974	Uncharacterized protein	9.2458	54.2	11	108	9	0.821	0.715	0.625	1.389	1.267	1.266	1.815	0.0020628	extracellular		GO:0005576 extracellular region;		K23418			PF00050	Kazal-type serine protease inhibitor domain	S	KOG3649	FOG: Kazal-type serine protease inhibitor domain
F02_transcript_14704	L-amino-acid oxidase-like; K03334 L-amino-acid oxidase [EC:1.4.3.2] (A)	56.928	4.7	3	4	3	0.725	0.714	0.715	1.216	1.373	1.318	1.814	0.0036557	extracellular				K03334	IL4I1; L-amino-acid oxidase [EC:1.4.3.2]	dre00250 Alanine, aspartate and glutamate metabolism - Danio rerio (zebrafish); dre00270 Cysteine and methionine metabolism - Danio rerio (zebrafish); dre00280 Valine, leucine and isoleucine degradation - Danio rerio (zebrafish); dre00350 Tyrosine metabolism - Danio rerio (zebrafish); dre00360 Phenylalanine metabolism - Danio rerio (zebrafish); dre00380 Tryptophan metabolism - Danio rerio (zebraf…	PF01593	Flavin containing amine oxidoreductase	Q	KOG0029	Amine oxidase
F02_transcript_11475	gelsolin-like; K05768 gelsolin (A)	64.993	7.8	4	5	4	0.703	0.83	0.676	1.292	1.176	1.52	1.805	0.003837	nucleus	GO:0001101 response to acid chemical; GO:0001775 cell activation; GO:0002252 immune effector process; GO:0002263 cell activation involved in immune response; GO:0002274 myeloid leukocyte activation; GO:0002275 myeloid cell activation involved in immune response; GO:0002283 neutrophil activation involved in immune response; GO:0002366 leukocyte activation involved in immune response; GO:0002376 im…	GO:0001726 ruffle; GO:0002102 podosome; GO:0005576 extracellular region; GO:0005615 extracellular space; GO:0005622 intracellular; GO:0005623 cell; GO:0005737 cytoplasm; GO:0005829 cytosol; GO:0005856 cytoskeleton; GO:0005886 plasma membrane; GO:0005938 cell cortex; GO:0012505 endomembrane system; GO:0015629 actin cytoskeleton; GO:0016020 membrane; GO:0016528 sarcoplasm; GO:0030027 lamellipodium;…	GO:0003779 actin binding; GO:0005488 binding; GO:0005509 calcium ion binding; GO:0005515 protein binding; GO:0008092 cytoskeletal protein binding; GO:0017022 myosin binding; GO:0043167 ion binding; GO:0043169 cation binding; GO:0045159 myosin II binding; GO:0046872 metal ion binding;	K05768	GSN; gelsolin	dre04810 Regulation of actin cytoskeleton - Danio rerio (zebrafish);	PF00626	Gelsolin repeat	Z	KOG0443	Actin regulatory proteins (gelsolin/villin family)
F02_transcript_26908	glutathione S-transferase omega-1-like; K00799 glutathione S-transferase [EC:2.5.1.18] (A)	27.758	24.6	6	9	6	0.711	0.733	0.726	1.356	1.219	1.34	1.804	7.6033e-05	mitochondria	GO:0000302 response to reactive oxygen species; GO:0005975 carbohydrate metabolic process; GO:0005996 monosaccharide metabolic process; GO:0006082 organic acid metabolic process; GO:0006518 peptide metabolic process; GO:0006575 cellular modified amino acid metabolic process; GO:0006725 cellular aromatic compound metabolic process; GO:0006726 eye pigment biosynthetic process; GO:0006728 pteridine …	GO:0005576 extracellular region; GO:0005604 basement membrane; GO:0005622 intracellular; GO:0005623 cell; GO:0005634 nucleus; GO:0005635 nuclear envelope; GO:0005737 cytoplasm; GO:0005739 mitochondrion; GO:0005829 cytosol; GO:0012505 endomembrane system; GO:0016020 membrane; GO:0030424 axon; GO:0031012 extracellular matrix; GO:0031090 organelle membrane; GO:0031965 nuclear membrane; GO:0031967 or…	GO:0003824 catalytic activity; GO:0004364 glutathione transferase activity; GO:0004734 pyrimidodiazepine synthase activity; GO:0005488 binding; GO:0005515 protein binding; GO:0015036 disulfide oxidoreductase activity; GO:0015037 peptide disulfide oxidoreductase activity; GO:0015038 glutathione disulfide oxidoreductase activity; GO:0016209 antioxidant activity; GO:0016491 oxidoreductase activity; …	K00799	GST, gst; glutathione S-transferase [EC:2.5.1.18]	dre00480 Glutathione metabolism - Danio rerio (zebrafish); dre00980 Metabolism of xenobiotics by cytochrome P450 - Danio rerio (zebrafish); dre00982 Drug metabolism - cytochrome P450 - Danio rerio (zebrafish); dre00983 Drug metabolism - other enzymes - Danio rerio (zebrafish); dre01100 Metabolic pathways - Danio rerio (zebrafish);	PF13417; PF00043	Glutathione S-transferase, N-terminal domain; Glutathione S-transferase, C-terminal domain	O	KOG0406	Glutathione S-transferase
F02_transcript_9013	probable ATP-dependent RNA helicase DHX58-like; K12649 ATP-dependent RNA helicase DHX58 [EC:3.6.3.14] (A)	76.477	14.6	9	9	9	0.79	0.679	0.726	1.357	1.245	1.322	1.788	0.00032398	cytoplasm	GO:0001817 regulation of cytokine production; GO:0001818 negative regulation of cytokine production; GO:0001819 positive regulation of cytokine production; GO:0002682 regulation of immune system process; GO:0002683 negative regulation of immune system process; GO:0002684 positive regulation of immune system process; GO:0002697 regulation of immune effector process; GO:0002698 negative regulation …	GO:0005622 intracellular; GO:0005623 cell; GO:0005737 cytoplasm; GO:0044424 intracellular part; GO:0044464 cell part;	GO:0003676 nucleic acid binding; GO:0003723 RNA binding; GO:0003725 double-stranded RNA binding; GO:0003727 single-stranded RNA binding; GO:0005488 binding; GO:0008270 zinc ion binding; GO:0043167 ion binding; GO:0043169 cation binding; GO:0046872 metal ion binding; GO:0046914 transition metal ion binding; GO:0097159 organic cyclic compound binding; GO:1901363 heterocyclic compound binding;	K12649	DHX58, LGP2; ATP-dependent RNA helicase DHX58 [EC:3.6.3.14]	dre04622 RIG-I-like receptor signaling pathway - Danio rerio (zebrafish);	PF11648	C-terminal domain of RIG-I	A	KOG0354	DEAD-box like helicase
F02_transcript_25607	serpinb14, im:7148243, si:ch73-303g23.4; serpin peptidase inhibitor, clade B (ovalbumin), member 14; K13963 serpin B (A)	33.618	38.6	14	49	10	0.759	0.723	0.679	1.308	1.326	1.23	1.788	0.000122942	cytoplasm	GO:0000003 reproduction; GO:0001775 cell activation; GO:0001817 regulation of cytokine production; GO:0001819 positive regulation of cytokine production; GO:0001910 regulation of leukocyte mediated cytotoxicity; GO:0001911 negative regulation of leukocyte mediated cytotoxicity; GO:0002252 immune effector process; GO:0002253 activation of immune response; GO:0002263 cell activation involved in imm…	GO:0005576 extracellular region; GO:0005615 extracellular space; GO:0005622 intracellular; GO:0005623 cell; GO:0005634 nucleus; GO:0005654 nucleoplasm; GO:0005737 cytoplasm; GO:0005794 Golgi apparatus; GO:0005829 cytosol; GO:0005886 plasma membrane; GO:0012505 endomembrane system; GO:0012506 vesicle membrane; GO:0016020 membrane; GO:0030141 secretory granule; GO:0030659 cytoplasmic vesicle membra…	GO:0002020 protease binding; GO:0004857 enzyme inhibitor activity; GO:0004866 endopeptidase inhibitor activity; GO:0004867 serine-type endopeptidase inhibitor activity; GO:0004869 cysteine-type endopeptidase inhibitor activity; GO:0005488 binding; GO:0005515 protein binding; GO:0019899 enzyme binding; GO:0030234 enzyme regulator activity; GO:0030414 peptidase inhibitor activity; GO:0043027 cystei…	K13963	SERPINB; serpin B		PF00079	Serpin (serine protease inhibitor)	V	KOG2392	Serpin
F02_transcript_3408	Beta-galactosidase-1-like protein 3 [Stylophora pistillata]	59.898	7.4	3	3	3	0.73	0.641	0.803	1.211	1.317	1.356	1.787	0.00136473	endoplasmic reticulum		GO:0005622 intracellular; GO:0005623 cell; GO:0005737 cytoplasm; GO:0005773 vacuole; GO:0043226 organelle; GO:0043227 membrane-bounded organelle; GO:0043229 intracellular organelle; GO:0043231 intracellular membrane-bounded organelle; GO:0044424 intracellular part; GO:0044444 cytoplasmic part; GO:0044464 cell part;	GO:0003824 catalytic activity; GO:0004553 hydrolase activity, hydrolyzing O-glycosyl compounds; GO:0004565 beta-galactosidase activity; GO:0015925 galactosidase activity; GO:0016787 hydrolase activity; GO:0016798 hydrolase activity, acting on glycosyl bonds;				PF01301	Glycosyl hydrolases family 35	G	KOG0496	Beta-galactosidase
F02_transcript_3173	merlin-like; K16684 merlin (A)	68.258	1.2	1	1	1	0.7	0.502	0.988	1.475	1.696	0.696	1.766	0.187702	nucleus	GO:0000003 reproduction; GO:0000280 nuclear division; GO:0000578 embryonic axis specification; GO:0000910 cytokinesis; GO:0001558 regulation of cell growth; GO:0001654 eye development; GO:0001745 compound eye morphogenesis; GO:0001751 compound eye photoreceptor cell differentiation; GO:0001754 eye photoreceptor cell differentiation; GO:0001932 regulation of protein phosphorylation; GO:0001934 pos…	GO:0005622 intracellular; GO:0005623 cell; GO:0005737 cytoplasm; GO:0005739 mitochondrion; GO:0005886 plasma membrane; GO:0005911 cell-cell junction; GO:0005912 adherens junction; GO:0005938 cell cortex; GO:0009898 cytoplasmic side of plasma membrane; GO:0016006 Nebenkern; GO:0016020 membrane; GO:0016324 apical plasma membrane; GO:0030054 cell junction; GO:0032991 macromolecular complex; GO:00363…	GO:0005488 binding; GO:0005515 protein binding; GO:0008092 cytoskeletal protein binding;	K16684	NF2; merlin	dre04530 Tight junction - Danio rerio (zebrafish);	PF09379; PF00373; PF09380	FERM N-terminal domain ; FERM central domain; FERM C-terminal PH-like domain	S	KOG3529	Radixin, moesin and related proteins of the ERM family
F02_transcript_17013	calreticulin-like; K08057 calreticulin (A)	48.339	44.5	16	32	1	0.478	0.712	0.967	1.244	1.412	1.13	1.755	0.048821	extracellular	GO:0000003 reproduction; GO:0000122 negative regulation of transcription from RNA polymerase II promoter; GO:0002376 immune system process; GO:0002396 MHC protein complex assembly; GO:0002397 MHC class I protein complex assembly; GO:0002474 antigen processing and presentation of peptide antigen via MHC class I; GO:0002478 antigen processing and presentation of exogenous peptide antigen; GO:000247…	GO:0001669 acrosomal vesicle; GO:0005576 extracellular region; GO:0005615 extracellular space; GO:0005622 intracellular; GO:0005623 cell; GO:0005634 nucleus; GO:0005635 nuclear envelope; GO:0005737 cytoplasm; GO:0005783 endoplasmic reticulum; GO:0005788 endoplasmic reticulum lumen; GO:0005789 endoplasmic reticulum membrane; GO:0005790 smooth endoplasmic reticulum; GO:0005793 endoplasmic reticulum…	GO:0001846 opsonin binding; GO:0001848 complement binding; GO:0001849 complement component C1q binding; GO:0003676 nucleic acid binding; GO:0003677 DNA binding; GO:0003723 RNA binding; GO:0003729 mRNA binding; GO:0005102 receptor binding; GO:0005178 integrin binding; GO:0005488 binding; GO:0005506 iron ion binding; GO:0005509 calcium ion binding; GO:0005515 protein binding; GO:0008134 transcripti…	K08057	CALR; calreticulin	dre04141 Protein processing in endoplasmic reticulum - Danio rerio (zebrafish); dre04145 Phagosome - Danio rerio (zebrafish); dre05168 Herpes simplex virus 1 infection - Danio rerio (zebrafish);			O	KOG0674	Calreticulin
F02_transcript_54	HOOK3; hook microtubule-tethering protein 3; K16536 protein HOOK3 (A)	63.26	21.4	11	15	1	0.646	0.839	0.743	0.805	2.251	0.804	1.732	0.2893	nucleus	GO:0000226 microtubule cytoskeleton organization; GO:0006810 transport; GO:0006996 organelle organization; GO:0007010 cytoskeleton organization; GO:0007017 microtubule-based process; GO:0007032 endosome organization; GO:0007033 vacuole organization; GO:0007034 vacuolar transport; GO:0007040 lysosome organization; GO:0007041 lysosomal transport; GO:0007097 nuclear migration; GO:0007275 multicellul…	GO:0000242 pericentriolar material; GO:0005622 intracellular; GO:0005623 cell; GO:0005737 cytoplasm; GO:0005794 Golgi apparatus; GO:0005801 cis-Golgi network; GO:0005813 centrosome; GO:0005815 microtubule organizing center; GO:0005856 cytoskeleton; GO:0012505 endomembrane system; GO:0015630 microtubule cytoskeleton; GO:0032991 macromolecular complex; GO:0034451 centriolar satellite; GO:0043226 or…	GO:0005488 binding; GO:0005515 protein binding; GO:0008017 microtubule binding; GO:0008092 cytoskeletal protein binding; GO:0015631 tubulin binding; GO:0034452 dynactin binding; GO:0042802 identical protein binding; GO:0045503 dynein light chain binding; GO:0045505 dynein intermediate chain binding; GO:0051959 dynein light intermediate chain binding;	K16536	HOOK3; protein HOOK3
F02_transcript_24840	tumor-associated calcium signal transducer 1 precursor [Bos taurus]	35.065	36.9	12	75	2	0.755	0.765	0.698	1.425	1.27	1.141	1.729	0.00149701	extracellular	GO:0001655 urogenital system development; GO:0001657 ureteric bud development; GO:0001822 kidney development; GO:0001823 mesonephros development; GO:0002009 morphogenesis of an epithelium; GO:0002376 immune system process; GO:0003008 system process; GO:0006355 regulation of transcription, DNA-templated; GO:0006357 regulation of transcription from RNA polymerase II promoter; GO:0006928 movement of…	GO:0005576 extracellular region; GO:0005615 extracellular space; GO:0005622 intracellular; GO:0005623 cell; GO:0005634 nucleus; GO:0005737 cytoplasm; GO:0005829 cytosol; GO:0005886 plasma membrane; GO:0005887 integral component of plasma membrane; GO:0005911 cell-cell junction; GO:0005923 bicellular tight junction; GO:0009925 basal plasma membrane; GO:0009986 cell surface; GO:0016020 membrane; GO…	GO:0005488 binding; GO:0005515 protein binding; GO:0038023 signaling receptor activity; GO:0044877 macromolecular complex binding; GO:0045296 cadherin binding; GO:0050839 cell adhesion molecule binding; GO:0060089 molecular transducer activity; GO:0098631 protein binding involved in cell adhesion; GO:0098632 protein binding involved in cell-cell adhesion; GO:0098641 cadherin binding involved in c…	K06737	EPCAM, TACSTD1, CD326; epithelial cell adhesion molecule		PF00086	Thyroglobulin type-1 repeat
F02_transcript_10857	gda, zgc:112282; guanine deaminase (EC:3.5.4.3); K01487 guanine deaminase [EC:3.5.4.3] (A)	31.042	34.9	9	13	9	0.731	0.748	0.718	1.271	1.25	1.263	1.722	9.1833e-07	cytoplasm	GO:0006139 nucleobase-containing compound metabolic process; GO:0006144 purine nucleobase metabolic process; GO:0006163 purine nucleotide metabolic process; GO:0006195 purine nucleotide catabolic process; GO:0006725 cellular aromatic compound metabolic process; GO:0006726 eye pigment biosynthetic process; GO:0006753 nucleoside phosphate metabolic process; GO:0006793 phosphorus metabolic process; …	GO:0005622 intracellular; GO:0005623 cell; GO:0005737 cytoplasm; GO:0005829 cytosol; GO:0044424 intracellular part; GO:0044444 cytoplasmic part; GO:0044464 cell part;	GO:0003824 catalytic activity; GO:0004153 dihydropterin deaminase activity; GO:0005488 binding; GO:0008270 zinc ion binding; GO:0008892 guanine deaminase activity; GO:0016787 hydrolase activity; GO:0016810 hydrolase activity, acting on carbon-nitrogen (but not peptide) bonds; GO:0016814 hydrolase activity, acting on carbon-nitrogen (but not peptide) bonds, in cyclic amidines; GO:0019239 deaminase…	K01487	E3.5.4.3, guaD; guanine deaminase [EC:3.5.4.3]	dre00230 Purine metabolism - Danio rerio (zebrafish); dre01100 Metabolic pathways - Danio rerio (zebrafish);	PF01979	Amidohydrolase family	FQ	KOG3968	Atrazine chlorohydrolase/guanine deaminase
F02_transcript_28497	Cysteine-rich secretory protein 2 [Zootermopsis nevadensis]	26.278	11.9	3	11	3	0.671	0.69	0.859	1.22	1.329	1.221	1.698	0.0029971	extracellular	GO:0001775 cell activation; GO:0002252 immune effector process; GO:0002263 cell activation involved in immune response; GO:0002274 myeloid leukocyte activation; GO:0002275 myeloid cell activation involved in immune response; GO:0002283 neutrophil activation involved in immune response; GO:0002366 leukocyte activation involved in immune response; GO:0002376 immune system process; GO:0002443 leukoc…	GO:0005576 extracellular region; GO:0005615 extracellular space; GO:0005622 intracellular; GO:0005623 cell; GO:0005737 cytoplasm; GO:0012505 endomembrane system; GO:0030133 transport vesicle; GO:0030141 secretory granule; GO:0031012 extracellular matrix; GO:0031410 cytoplasmic vesicle; GO:0031974 membrane-enclosed lumen; GO:0031982 vesicle; GO:0031983 vesicle lumen; GO:0034774 secretory granule l…		K19919	CRISP; cysteine-rich secretory protein		PF00188; PF08562	Cysteine-rich secretory protein family; Crisp	S	KOG3017	Defense-related protein containing SCP domain
F02_transcript_59	mucin-5AC-like [Stylophora pistillata]	240.15	32.1	60	95	51	0.724	0.748	0.778	1.171	1.372	1.24	1.681	0.00052016	extracellular							PF08742; PF01826; PF12714	C8 domain; Trypsin Inhibitor like cysteine rich domain; TILa domain	VW	KOG1216	von Willebrand factor and related coagulation proteins
F02_transcript_27727	nt5c1bb, fl02f11, si:ch211-59d15.1, wu:fl02f11; 5'-nucleotidase, cytosolic IB b; K01081 5'-nucleotidase [EC:3.1.3.5] (A)	36.051	11.6	4	5	2	0.778	0.733	0.766	1.154	1.319	1.306	1.66	0.00040464	cytoplasm	GO:0006139 nucleobase-containing compound metabolic process; GO:0006163 purine nucleotide metabolic process; GO:0006195 purine nucleotide catabolic process; GO:0006725 cellular aromatic compound metabolic process; GO:0006753 nucleoside phosphate metabolic process; GO:0006793 phosphorus metabolic process; GO:0006796 phosphate-containing compound metabolic process; GO:0006807 nitrogen compound meta…	GO:0005622 intracellular; GO:0005623 cell; GO:0005737 cytoplasm; GO:0005829 cytosol; GO:0044424 intracellular part; GO:0044444 cytoplasmic part; GO:0044464 cell part;	GO:0003824 catalytic activity; GO:0008252 nucleotidase activity; GO:0008253 5'-nucleotidase activity; GO:0016787 hydrolase activity; GO:0016788 hydrolase activity, acting on ester bonds; GO:0016791 phosphatase activity; GO:0042578 phosphoric ester hydrolase activity;	K01081	E3.1.3.5; 5'-nucleotidase [EC:3.1.3.5]	dre00230 Purine metabolism - Danio rerio (zebrafish); dre00240 Pyrimidine metabolism - Danio rerio (zebrafish); dre00760 Nicotinate and nicotinamide metabolism - Danio rerio (zebrafish); dre01100 Metabolic pathways - Danio rerio (zebrafish);
F02_transcript_25216	apolipoprotein D precursor [Rattus norvegicus]	20.682	12	2	5	2	0.856	0.702	0.754	1.21	1.326	1.3	1.659	0.00138008	extracellular	GO:0000302 response to reactive oxygen species; GO:0001525 angiogenesis; GO:0001568 blood vessel development; GO:0001817 regulation of cytokine production; GO:0001818 negative regulation of cytokine production; GO:0001944 vasculature development; GO:0001952 regulation of cell-matrix adhesion; GO:0001953 negative regulation of cell-matrix adhesion; GO:0002682 regulation of immune system process; G…	GO:0005576 extracellular region; GO:0005615 extracellular space; GO:0005622 intracellular; GO:0005623 cell; GO:0005737 cytoplasm; GO:0005783 endoplasmic reticulum; GO:0005829 cytosol; GO:0005840 ribosome; GO:0012505 endomembrane system; GO:0022626 cytosolic ribosome; GO:0030425 dendrite; GO:0032991 macromolecular complex; GO:0036477 somatodendritic compartment; GO:0042995 cell projection; GO:0043…	GO:0005215 transporter activity; GO:0005319 lipid transporter activity; GO:0005488 binding; GO:0005496 steroid binding; GO:0008289 lipid binding; GO:0015485 cholesterol binding; GO:0032934 sterol binding; GO:0036094 small molecule binding; GO:0043178 alcohol binding; GO:0097159 organic cyclic compound binding;	K03098	APOD; apolipoprotein D and lipocalin family protein		PF08212	Lipocalin-like domain	M	KOG4824	Apolipoprotein D/Lipocalin
F02_transcript_108	trip12, TRIP-12, im:7149446, si:ch211-272f3.4; thyroid hormone receptor interactor 12; K10590 E3 ubiquitin-protein ligase TRIP12 [EC:6.3.2.19] (A)	221.39	4.1	7	8	7	0.741	0.723	0.785	1.1	1.321	1.293	1.651	0.00135629	nucleus	GO:0000209 protein polyubiquitination; GO:0006282 regulation of DNA repair; GO:0006464 cellular protein modification process; GO:0006508 proteolysis; GO:0006511 ubiquitin-dependent protein catabolic process; GO:0006807 nitrogen compound metabolic process; GO:0006950 response to stress; GO:0006974 cellular response to DNA damage stimulus; GO:0008152 metabolic process; GO:0009056 catabolic process;…	GO:0005622 intracellular; GO:0005623 cell; GO:0005634 nucleus; GO:0005654 nucleoplasm; GO:0005737 cytoplasm; GO:0005829 cytosol; GO:0016604 nuclear body; GO:0016607 nuclear speck; GO:0031974 membrane-enclosed lumen; GO:0031981 nuclear lumen; GO:0043226 organelle; GO:0043227 membrane-bounded organelle; GO:0043229 intracellular organelle; GO:0043231 intracellular membrane-bounded organelle; GO:0043…	GO:0003824 catalytic activity; GO:0004842 ubiquitin-protein transferase activity; GO:0005102 receptor binding; GO:0005488 binding; GO:0005515 protein binding; GO:0008134 transcription factor binding; GO:0016740 transferase activity; GO:0019787 ubiquitin-like protein transferase activity; GO:0035257 nuclear hormone receptor binding; GO:0046966 thyroid hormone receptor binding; GO:0051427 hormone r…	K10590	TRIP12; E3 ubiquitin-protein ligase TRIP12 [EC:2.3.2.26]	dre04120 Ubiquitin mediated proteolysis - Danio rerio (zebrafish);	PF00632	HECT-domain (ubiquitin-transferase)	O	KOG0170	E3 ubiquitin protein ligase
F02_transcript_9818	uap1l1, zgc:56509; UDP-N-acetylglucosamine pyrophosphorylase 1, like 1 (EC:2.7.7.-); K00972 UDP-N-acetylglucosamine/UDP-N-acetylgalactosamine diphosphorylase [EC:2.7.7.23 2.7.7.83] (A)	37.863	41.9	14	18	1	0.753	0.871	0.665	1.036	1.355	1.379	1.647	0.0147968	cytoplasm	GO:0001700 embryonic development via the syncytial blastoderm; GO:0001838 embryonic epithelial tube formation; GO:0002009 morphogenesis of an epithelium; GO:0006022 aminoglycan metabolic process; GO:0006023 aminoglycan biosynthetic process; GO:0006030 chitin metabolic process; GO:0006031 chitin biosynthetic process; GO:0006034 cuticle chitin metabolic process; GO:0006035 cuticle chitin biosynthet…	GO:0005622 intracellular; GO:0005623 cell; GO:0005737 cytoplasm; GO:0005829 cytosol; GO:0044424 intracellular part; GO:0044444 cytoplasmic part; GO:0044464 cell part;	GO:0003824 catalytic activity; GO:0003977 UDP-N-acetylglucosamine diphosphorylase activity; GO:0016740 transferase activity; GO:0016772 transferase activity, transferring phosphorus-containing groups; GO:0016779 nucleotidyltransferase activity; GO:0070569 uridylyltransferase activity;	K00972	UAP1; UDP-N-acetylglucosamine/UDP-N-acetylgalactosamine diphosphorylase [EC:2.7.7.23 2.7.7.83]	dre00520 Amino sugar and nucleotide sugar metabolism - Danio rerio (zebrafish); dre01100 Metabolic pathways - Danio rerio (zebrafish);			M	KOG2388	UDP-N-acetylglucosamine pyrophosphorylase
F02_transcript_886	canx, wu:fe06b12, zgc:63524; calnexin; K08054 calnexin (A)	69.881	25.2	15	22	1	0.68	0.764	0.844	1.481	1.236	1.033	1.639	0.0159164	endoplasmic reticulum	GO:0001894 tissue homeostasis; GO:0001895 retina homeostasis; GO:0002376 immune system process; GO:0002474 antigen processing and presentation of peptide antigen via MHC class I; GO:0002478 antigen processing and presentation of exogenous peptide antigen; GO:0002495 antigen processing and presentation of peptide antigen via MHC class II; GO:0002504 antigen processing and presentation of peptide o…	GO:0005622 intracellular; GO:0005623 cell; GO:0005737 cytoplasm; GO:0005783 endoplasmic reticulum; GO:0005788 endoplasmic reticulum lumen; GO:0005789 endoplasmic reticulum membrane; GO:0005790 smooth endoplasmic reticulum; GO:0005840 ribosome; GO:0005886 plasma membrane; GO:0012505 endomembrane system; GO:0016020 membrane; GO:0016021 integral component of membrane; GO:0030176 integral component o…	GO:0005102 receptor binding; GO:0005488 binding; GO:0005509 calcium ion binding; GO:0005515 protein binding; GO:0034185 apolipoprotein binding; GO:0035254 glutamate receptor binding; GO:0035255 ionotropic glutamate receptor binding; GO:0043167 ion binding; GO:0043169 cation binding; GO:0046872 metal ion binding; GO:0051082 unfolded protein binding;	K08054	CANX; calnexin	dre04141 Protein processing in endoplasmic reticulum - Danio rerio (zebrafish); dre04145 Phagosome - Danio rerio (zebrafish);			O	KOG0675	Calnexin
F02_transcript_3379	band 3 anion transport protein [Danio rerio]	93.652	0.8	1	1	1	0.783	0.78	0.729	1.375	1.121	1.256	1.637	0.00151854	plasma membrane							PF07565	Band 3 cytoplasmic domain	P	KOG1172	Na+-independent Cl/HCO3 exchanger AE1 and related transporters (SLC4 family)
F02_transcript_22289	gosr2, wu:fc33b02, zgc:64068; golgi SNAP receptor complex member 2; K08496 golgi SNAP receptor complex member 2 (A)	24.825	15.1	3	3	3	0.757	0.792	0.748	1.153	1.315	1.289	1.636	0.00038149	peroxisome	GO:0006605 protein targeting; GO:0006623 protein targeting to vacuole; GO:0006810 transport; GO:0006886 intracellular protein transport; GO:0006888 ER to Golgi vesicle-mediated transport; GO:0006891 intra-Golgi vesicle-mediated transport; GO:0006892 post-Golgi vesicle-mediated transport; GO:0006896 Golgi to vacuole transport; GO:0006900 membrane budding; GO:0006901 vesicle coating; GO:0006903 ves…	GO:0000139 Golgi membrane; GO:0005622 intracellular; GO:0005623 cell; GO:0005737 cytoplasm; GO:0005768 endosome; GO:0005770 late endosome; GO:0005783 endoplasmic reticulum; GO:0005789 endoplasmic reticulum membrane; GO:0005793 endoplasmic reticulum-Golgi intermediate compartment; GO:0005794 Golgi apparatus; GO:0005798 Golgi-associated vesicle; GO:0010008 endosome membrane; GO:0012505 endomembrane…	GO:0000149 SNARE binding; GO:0005484 SNAP receptor activity; GO:0005488 binding; GO:0005515 protein binding;	K08496	GOSR2, BOS1; golgi SNAP receptor complex member 2	dre04130 SNARE interactions in vesicular transport - Danio rerio (zebrafish);	PF12352	Snare region anchored in the vesicle membrane C-terminus	U	KOG3251	Golgi SNAP receptor complex member
F02_transcript_8640	myb; v-myb avian myeloblastosis viral oncogene homolog; K09420 myb proto-oncogene protein (A)	46.773	2.7	1	2	1	0.858	0.699	0.743	1.234	1.329	1.192	1.633	0.0019999	nucleus	GO:0000082 G1/S transition of mitotic cell cycle; GO:0000122 negative regulation of transcription from RNA polymerase II promoter; GO:0000278 mitotic cell cycle; GO:0001701 in utero embryonic development; GO:0001775 cell activation; GO:0002376 immune system process; GO:0002520 immune system development; GO:0002521 leukocyte differentiation; GO:0002682 regulation of immune system process; GO:00026…	GO:0005622 intracellular; GO:0005623 cell; GO:0005634 nucleus; GO:0005654 nucleoplasm; GO:0005737 cytoplasm; GO:0005829 cytosol; GO:0016363 nuclear matrix; GO:0031974 membrane-enclosed lumen; GO:0031981 nuclear lumen; GO:0034399 nuclear periphery; GO:0043226 organelle; GO:0043227 membrane-bounded organelle; GO:0043229 intracellular organelle; GO:0043231 intracellular membrane-bounded organelle; G…	GO:0000976 transcription regulatory region sequence-specific DNA binding; GO:0000977 RNA polymerase II regulatory region sequence-specific DNA binding; GO:0000978 RNA polymerase II core promoter proximal region sequence-specific DNA binding; GO:0000981 RNA polymerase II transcription factor activity, sequence-specific DNA binding; GO:0000982 transcription factor activity, RNA polymerase II core p…	K09420	MYB, C-MYB; transcriptional activator Myb		PF00249	Myb-like DNA-binding domain	ADK	KOG0048	Transcription factor, Myb superfamily
F02_transcript_24918	interferon-induced protein with tetratricopeptide repeats 2, partial [Bos taurus]	36.37	23.6	8	11	3	0.708	0.756	0.839	1.207	1.239	1.299	1.626	0.00082168	cytoplasm									S	KOG1124	FOG: TPR repeat
F02_transcript_1715	DDX58; DEAD (Asp-Glu-Ala-Asp) box polypeptide 58; K12646 ATP-dependent RNA helicase DDX58 [EC:3.6.3.14] (A)	108.08	9.6	9	9	8	0.721	0.789	0.809	1.266	1.194	1.273	1.61	0.00029934	cytoplasm	GO:0000003 reproduction; GO:0000578 embryonic axis specification; GO:0001817 regulation of cytokine production; GO:0001818 negative regulation of cytokine production; GO:0001819 positive regulation of cytokine production; GO:0002218 activation of innate immune response; GO:0002221 pattern recognition receptor signaling pathway; GO:0002230 positive regulation of defense response to virus by host; …	GO:0000228 nuclear chromosome; GO:0000793 condensed chromosome; GO:0000794 condensed nuclear chromosome; GO:0001726 ruffle; GO:0005622 intracellular; GO:0005623 cell; GO:0005634 nucleus; GO:0005694 chromosome; GO:0005737 cytoplasm; GO:0005829 cytosol; GO:0005856 cytoskeleton; GO:0005886 plasma membrane; GO:0005911 cell-cell junction; GO:0005923 bicellular tight junction; GO:0015629 actin cytoskel…	GO:0003676 nucleic acid binding; GO:0003677 DNA binding; GO:0003690 double-stranded DNA binding; GO:0003723 RNA binding; GO:0003725 double-stranded RNA binding; GO:0003727 single-stranded RNA binding; GO:0003824 catalytic activity; GO:0005488 binding; GO:0005515 protein binding; GO:0008186 RNA-dependent ATPase activity; GO:0008270 zinc ion binding; GO:0016462 pyrophosphatase activity; GO:0016787 …	K12646	DDX58, RIG-I; ATP-dependent RNA helicase DDX58 [EC:3.6.3.14]	dre04622 RIG-I-like receptor signaling pathway - Danio rerio (zebrafish); dre04623 Cytosolic DNA-sensing pathway - Danio rerio (zebrafish); dre05168 Herpes simplex virus 1 infection - Danio rerio (zebrafish);	PF00270; PF11648	DEAD/DEAH box helicase; C-terminal domain of RIG-I	A	KOG0354	DEAD-box like helicase
F02_transcript_18415	ethanolamine-phosphate phospho-lyase-like; K14286 ethanolamine-phosphate phospho-lyase [EC:4.2.3.2] (A)	55.333	23	11	12	11	0.712	0.797	0.788	1.219	1.292	1.182	1.608	0.00042434	cytoplasm	GO:0006629 lipid metabolic process; GO:0006644 phospholipid metabolic process; GO:0006646 phosphatidylethanolamine biosynthetic process; GO:0006650 glycerophospholipid metabolic process; GO:0006793 phosphorus metabolic process; GO:0006796 phosphate-containing compound metabolic process; GO:0008152 metabolic process; GO:0008610 lipid biosynthetic process; GO:0008654 phospholipid biosynthetic proce…	GO:0005622 intracellular; GO:0005623 cell; GO:0005737 cytoplasm; GO:0005739 mitochondrion; GO:0005759 mitochondrial matrix; GO:0031974 membrane-enclosed lumen; GO:0043226 organelle; GO:0043227 membrane-bounded organelle; GO:0043229 intracellular organelle; GO:0043231 intracellular membrane-bounded organelle; GO:0043233 organelle lumen; GO:0044422 organelle part; GO:0044424 intracellular part; GO:…	GO:0003824 catalytic activity; GO:0005488 binding; GO:0005515 protein binding; GO:0008144 drug binding; GO:0008453 alanine-glyoxylate transaminase activity; GO:0008483 transaminase activity; GO:0016740 transferase activity; GO:0016769 transferase activity, transferring nitrogenous groups; GO:0016829 lyase activity; GO:0016835 carbon-oxygen lyase activity; GO:0016838 carbon-oxygen lyase activity, …	K14286	AGXT2L1, ETNPPL; ethanolamine-phosphate phospho-lyase [EC:4.2.3.2]	dre00564 Glycerophospholipid metabolism - Danio rerio (zebrafish); dre01100 Metabolic pathways - Danio rerio (zebrafish);	PF00202	Aminotransferase class-III	E	KOG1403	Predicted alanine-glyoxylate aminotransferase
F02_transcript_166	OBSCN; obscurin, cytoskeletal calmodulin and titin-interacting RhoGEF; K17531 Obscurin-RhoGEF [EC:2.7.11.1] (A)	137.88	52.5	18	38	18	0.708	0.695	0.912	1.172	1.317	1.221	1.603	0.0070589	cytoplasm				K06514	THY1, CD90; Thy-1 cell surface antigen
F02_transcript_27847	PYCARD; PYD and CARD domain containing; K12799 apoptosis-associated speck-like protein containing a CARD (A)	22.94	20.3	5	7	5	0.693	0.781	0.832	1.259	1.283	1.154	1.603	0.00165607	cytoplasm	GO:0001773 myeloid dendritic cell activation; GO:0001775 cell activation; GO:0001816 cytokine production; GO:0001817 regulation of cytokine production; GO:0001818 negative regulation of cytokine production; GO:0001819 positive regulation of cytokine production; GO:0001932 regulation of protein phosphorylation; GO:0001933 negative regulation of protein phosphorylation; GO:0001934 positive regulati…	GO:0000323 lytic vacuole; GO:0005576 extracellular region; GO:0005622 intracellular; GO:0005623 cell; GO:0005634 nucleus; GO:0005730 nucleolus; GO:0005737 cytoplasm; GO:0005739 mitochondrion; GO:0005764 lysosome; GO:0005766 primary lysosome; GO:0005773 vacuole; GO:0005775 vacuolar lumen; GO:0005783 endoplasmic reticulum; GO:0005829 cytosol; GO:0008385 IkappaB kinase complex; GO:0012505 endomembra…	GO:0002020 protease binding; GO:0003824 catalytic activity; GO:0004175 endopeptidase activity; GO:0004197 cysteine-type endopeptidase activity; GO:0005102 receptor binding; GO:0005126 cytokine receptor binding; GO:0005138 interleukin-6 receptor binding; GO:0005488 binding; GO:0005515 protein binding; GO:0005523 tropomyosin binding; GO:0008047 enzyme activator activity; GO:0008092 cytoskeletal pro…				PF02758; PF00619	PAAD/DAPIN/Pyrin domain; Caspase recruitment domain
F02_transcript_15360	lysosome-associated membrane glycoprotein 1-like; K06501 CD68 antigen (A)	35.219	18.5	6	9	6	0.719	0.774	0.819	1.232	1.25	1.225	1.603	0.0064393	plasma membrane	GO:0009987 cellular process; GO:0010033 response to organic substance; GO:0042221 response to chemical; GO:0050896 response to stimulus; GO:0051716 cellular response to stimulus; GO:0070887 cellular response to chemical stimulus; GO:0071310 cellular response to organic substance;	GO:0000323 lytic vacuole; GO:0005622 intracellular; GO:0005623 cell; GO:0005737 cytoplasm; GO:0005764 lysosome; GO:0005765 lysosomal membrane; GO:0005768 endosome; GO:0005773 vacuole; GO:0005774 vacuolar membrane; GO:0005886 plasma membrane; GO:0010008 endosome membrane; GO:0012505 endomembrane system; GO:0016020 membrane; GO:0031090 organelle membrane; GO:0031410 cytoplasmic vesicle; GO:0031982 …		K06501	CD68; CD68 antigen	dre04142 Lysosome - Danio rerio (zebrafish);			S	KOG4818	Lysosomal-associated membrane protein
F02_transcript_13149	tetraspanin-7-like; K06571 tetraspanin-7 (A)	27.816	23.5	6	7	6	0.792	0.698	0.82	1.202	1.314	1.184	1.602	0.00129949	plasma membrane	GO:0001817 regulation of cytokine production; GO:0002682 regulation of immune system process; GO:0002683 negative regulation of immune system process; GO:0002697 regulation of immune effector process; GO:0002698 negative regulation of immune effector process; GO:0002831 regulation of response to biotic stimulus; GO:0002832 negative regulation of response to biotic stimulus; GO:0007154 cell commun…	GO:0005623 cell; GO:0005886 plasma membrane; GO:0005887 integral component of plasma membrane; GO:0016020 membrane; GO:0016021 integral component of membrane; GO:0031224 intrinsic component of membrane; GO:0031226 intrinsic component of plasma membrane; GO:0044425 membrane part; GO:0044459 plasma membrane part; GO:0044464 cell part; GO:0071944 cell periphery;		K06571	TSPAN7, TM4SF2, MXS1, CD231; tetraspanin-7				S	KOG3882	Tetraspanin family integral membrane protein
F02_transcript_17055	Uncharacterized protein	24.995	9.7	2	4	2	0.739	0.679	0.909	1.238	1.4	1.086	1.6	0.0141182	nucleus	GO:0007155 cell adhesion; GO:0007160 cell-matrix adhesion; GO:0022610 biological adhesion; GO:0031589 cell-substrate adhesion;	GO:0005623 cell; GO:0009986 cell surface; GO:0044464 cell part;		K20733	MSLN; mesothelin
F02_transcript_3476	stip1, im:6911394, wu:fb36h09, wu:fi33b05, zgc:92133; stress-induced phosphoprotein 1; K09553 stress-induced-phosphoprotein 1 (A)	61.708	52.7	32	52	1	0.882	0.778	0.673	1.416	1.134	1.162	1.591	0.0114409	cytoplasm	GO:0000003 reproduction; GO:0006950 response to stress; GO:0007275 multicellular organism development; GO:0007568 aging; GO:0008340 determination of adult lifespan; GO:0009266 response to temperature stimulus; GO:0009408 response to heat; GO:0009628 response to abiotic stimulus; GO:0010259 multicellular organism aging; GO:0032501 multicellular organismal process; GO:0032502 developmental process;…	GO:0005622 intracellular; GO:0005623 cell; GO:0005634 nucleus; GO:0005737 cytoplasm; GO:0005794 Golgi apparatus; GO:0005829 cytosol; GO:0012505 endomembrane system; GO:0032991 macromolecular complex; GO:0043209 myelin sheath; GO:0043226 organelle; GO:0043227 membrane-bounded organelle; GO:0043229 intracellular organelle; GO:0043231 intracellular membrane-bounded organelle; GO:0044424 intracellula…	GO:0004857 enzyme inhibitor activity; GO:0005488 binding; GO:0005515 protein binding; GO:0008022 protein C-terminus binding; GO:0030234 enzyme regulator activity; GO:0030544 Hsp70 protein binding; GO:0031072 heat shock protein binding; GO:0042030 ATPase inhibitor activity; GO:0051087 chaperone binding; GO:0051879 Hsp90 protein binding; GO:0060589 nucleoside-triphosphatase regulator activity; GO:0…	K09553	STIP1; stress-induced-phosphoprotein 1				O	KOG0548	Molecular co-chaperone STI1
F02_transcript_19600	sepiapterin reductase-like; K00072 sepiapterin reductase [EC:1.1.1.153] (A)	29.24	6.2	2	2	2	0.789	0.784	0.763	1.266	1.271	1.177	1.59	6.3932e-05	cytoplasm	GO:0000902 cell morphogenesis; GO:0000904 cell morphogenesis involved in differentiation; GO:0001505 regulation of neurotransmitter levels; GO:0006066 alcohol metabolic process; GO:0006082 organic acid metabolic process; GO:0006520 cellular amino acid metabolic process; GO:0006558 L-phenylalanine metabolic process; GO:0006584 catecholamine metabolic process; GO:0006725 cellular aromatic compound …	GO:0005622 intracellular; GO:0005623 cell; GO:0005634 nucleus; GO:0005654 nucleoplasm; GO:0005737 cytoplasm; GO:0005829 cytosol; GO:0031974 membrane-enclosed lumen; GO:0031981 nuclear lumen; GO:0043226 organelle; GO:0043227 membrane-bounded organelle; GO:0043229 intracellular organelle; GO:0043231 intracellular membrane-bounded organelle; GO:0043233 organelle lumen; GO:0044422 organelle part; GO:…	GO:0000166 nucleotide binding; GO:0003824 catalytic activity; GO:0004033 aldo-keto reductase (NADP) activity; GO:0004757 sepiapterin reductase activity; GO:0005488 binding; GO:0005515 protein binding; GO:0016491 oxidoreductase activity; GO:0016614 oxidoreductase activity, acting on CH-OH group of donors; GO:0016616 oxidoreductase activity, acting on the CH-OH group of donors, NAD or NADP as accep…				PF00106	short chain dehydrogenase	Q	KOG1204	Predicted dehydrogenase
F02_transcript_23328	apoeb, apoe, cb82, fa96d02, hm:zeh1311, wu:fa03d06, wu:fa96d02, wu:fa97a11, wu:fc95h12, wu:fj54e06; apolipoprotein Eb; K04524 apolipoprotein E (A)	31.551	59.8	19	40	6	0.812	0.778	0.741	1.224	1.261	1.218	1.589	8.225e-05	extracellular	GO:0000302 response to reactive oxygen species; GO:0001101 response to acid chemical; GO:0001523 retinoid metabolic process; GO:0001558 regulation of cell growth; GO:0001568 blood vessel development; GO:0001932 regulation of protein phosphorylation; GO:0001933 negative regulation of protein phosphorylation; GO:0001936 regulation of endothelial cell proliferation; GO:0001937 negative regulation of…	GO:0000323 lytic vacuole; GO:0005576 extracellular region; GO:0005615 extracellular space; GO:0005622 intracellular; GO:0005623 cell; GO:0005634 nucleus; GO:0005635 nuclear envelope; GO:0005737 cytoplasm; GO:0005764 lysosome; GO:0005768 endosome; GO:0005769 early endosome; GO:0005770 late endosome; GO:0005773 vacuole; GO:0005783 endoplasmic reticulum; GO:0005788 endoplasmic reticulum lumen; GO:00…	GO:0001540 beta-amyloid binding; GO:0005102 receptor binding; GO:0005198 structural molecule activity; GO:0005215 transporter activity; GO:0005319 lipid transporter activity; GO:0005488 binding; GO:0005496 steroid binding; GO:0005515 protein binding; GO:0005539 glycosaminoglycan binding; GO:0005543 phospholipid binding; GO:0008047 enzyme activator activity; GO:0008092 cytoskeletal protein binding…	K04524	APOE; apolipoprotein E		PF01442	Apolipoprotein A1/A4/E domain
F02_transcript_163	Uncharacterized protein	61.731	5.6	3	3	2	0.839	0.818	0.683	1.152	1.145	1.414	1.586	0.0083248	nucleus
F02_transcript_29917	hemoglobin subunit alpha-A-like; K13822 hemoglobin subunit alpha (A)	16.036	37.1	5	6	5	0.735	0.828	0.806	1.358	1.004	1.394	1.585	0.0153992	cytoplasm	GO:0000122 negative regulation of transcription from RNA polymerase II promoter; GO:0001666 response to hypoxia; GO:0002262 myeloid cell homeostasis; GO:0002376 immune system process; GO:0002520 immune system development; GO:0006355 regulation of transcription, DNA-templated; GO:0006357 regulation of transcription from RNA polymerase II promoter; GO:0006810 transport; GO:0006950 response to stres…	GO:0005622 intracellular; GO:0005623 cell; GO:0005737 cytoplasm; GO:0005829 cytosol; GO:0005833 hemoglobin complex; GO:0032991 macromolecular complex; GO:0044424 intracellular part; GO:0044444 cytoplasmic part; GO:0044445 cytosolic part; GO:0044464 cell part;	GO:0005344 oxygen transporter activity;				PF00042	Globin	C	KOG3378	Globins and related hemoproteins
F02_transcript_29233	putative RNA-directed DNA polymerase from transposon X-element [Stylophora pistillata]	12.333	38.1	4	20	4	0.756	0.848	0.717	1.138	1.147	1.364	1.572	0.0042557	cytoplasm				K21456	GSS; glutathione synthase [EC:6.3.2.3]	dre00270 Cysteine and methionine metabolism - Danio rerio (zebrafish); dre00480 Glutathione metabolism - Danio rerio (zebrafish); dre01100 Metabolic pathways - Danio rerio (zebrafish); dre04216 Ferroptosis - Danio rerio (zebrafish);
F02_transcript_29975	ba1l, si:bY187G17.4; ba1 globin, like; K13825 hemoglobin subunit epsilon (A)	16.886	44.6	6	9	6	0.691	0.79	0.828	1.313	0.995	1.31	1.567	0.0142045	cytoplasm	GO:0001666 response to hypoxia; GO:0002376 immune system process; GO:0002520 immune system development; GO:0006810 transport; GO:0006950 response to stress; GO:0007275 multicellular organism development; GO:0009628 response to abiotic stimulus; GO:0015669 gas transport; GO:0015671 oxygen transport; GO:0015893 drug transport; GO:0030097 hemopoiesis; GO:0032501 multicellular organismal process; GO:…	GO:0005622 intracellular; GO:0005623 cell; GO:0005737 cytoplasm; GO:0005829 cytosol; GO:0005833 hemoglobin complex; GO:0032991 macromolecular complex; GO:0044424 intracellular part; GO:0044444 cytoplasmic part; GO:0044445 cytosolic part; GO:0044464 cell part;	GO:0005344 oxygen transporter activity;	K13825	HBE; hemoglobin subunit epsilon		PF00042	Globin	C	KOG3378	Globins and related hemoproteins
F02_transcript_13179	Transcriptional repressor p66 alpha, partial [Stegodyphus mimosarum]	70.707	4.7	2	2	2	0.877	0.883	0.601	1.272	1.128	1.286	1.561	0.026544	cytoplasm	GO:0000122 negative regulation of transcription from RNA polymerase II promoter; GO:0001568 blood vessel development; GO:0001701 in utero embryonic development; GO:0001708 cell fate specification; GO:0001838 embryonic epithelial tube formation; GO:0001841 neural tube formation; GO:0001842 neural fold formation; GO:0001843 neural tube closure; GO:0001944 vasculature development; GO:0002009 morphog…	GO:0000118 histone deacetylase complex; GO:0000228 nuclear chromosome; GO:0000785 chromatin; GO:0000790 nuclear chromatin; GO:0005622 intracellular; GO:0005623 cell; GO:0005634 nucleus; GO:0005654 nucleoplasm; GO:0005694 chromosome; GO:0016581 NuRD complex; GO:0017053 transcriptional repressor complex; GO:0031974 membrane-enclosed lumen; GO:0031981 nuclear lumen; GO:0032991 macromolecular complex…	GO:0000981 RNA polymerase II transcription factor activity, sequence-specific DNA binding; GO:0003700 transcription factor activity, sequence-specific DNA binding; GO:0005488 binding; GO:0005515 protein binding; GO:0030674 protein binding, bridging; GO:0060090 binding, bridging;	K23194			PF00320	GATA zinc finger	S	KOG3740	Uncharacterized conserved protein
F02_transcript_25255	poly(U)-specific endoribonuclease-B-like [Stylophora pistillata]	33.31	19	5	6	3	0.688	0.824	0.896	1.114	1.308	1.335	1.56	0.0098167	cytoplasm,nucleus	GO:0006139 nucleobase-containing compound metabolic process; GO:0006417 regulation of translation; GO:0006725 cellular aromatic compound metabolic process; GO:0006807 nitrogen compound metabolic process; GO:0007610 behavior; GO:0007626 locomotory behavior; GO:0008152 metabolic process; GO:0008344 adult locomotory behavior; GO:0009889 regulation of biosynthetic process; GO:0009987 cellular process…		GO:0003676 nucleic acid binding; GO:0003723 RNA binding; GO:0003824 catalytic activity; GO:0004518 nuclease activity; GO:0004519 endonuclease activity; GO:0004521 endoribonuclease activity; GO:0004540 ribonuclease activity; GO:0005488 binding; GO:0016787 hydrolase activity; GO:0016788 hydrolase activity, acting on ester bonds; GO:0097159 organic cyclic compound binding; GO:1901363 heterocyclic co…	K14648	ENDOU, PP11; poly(U)-specific endoribonuclease [EC:3.1.-.-]				S	KOG2849	Placental protein 11
F02_transcript_24479	hexokinase-2-like; K00844 hexokinase [EC:2.7.1.1] (A)	55.949	11.7	4	4	4	0.727	0.783	0.852	1.307	1.33	1.047	1.56	0.0079374	cytoplasm,nucleus	GO:0001678 cellular glucose homeostasis; GO:0005975 carbohydrate metabolic process; GO:0006082 organic acid metabolic process; GO:0006090 pyruvate metabolic process; GO:0006091 generation of precursor metabolites and energy; GO:0006096 glycolytic process; GO:0006139 nucleobase-containing compound metabolic process; GO:0006163 purine nucleotide metabolic process; GO:0006164 purine nucleotide biosy…	GO:0005622 intracellular; GO:0005623 cell; GO:0005737 cytoplasm; GO:0005829 cytosol; GO:0044424 intracellular part; GO:0044444 cytoplasmic part; GO:0044464 cell part;	GO:0003824 catalytic activity; GO:0004340 glucokinase activity; GO:0004396 hexokinase activity; GO:0005488 binding; GO:0005515 protein binding; GO:0008865 fructokinase activity; GO:0016301 kinase activity; GO:0016740 transferase activity; GO:0016772 transferase activity, transferring phosphorus-containing groups; GO:0016773 phosphotransferase activity, alcohol group as acceptor; GO:0019158 mannok…	K00844	HK; hexokinase [EC:2.7.1.1]	dre00010 Glycolysis / Gluconeogenesis - Danio rerio (zebrafish); dre00051 Fructose and mannose metabolism - Danio rerio (zebrafish); dre00052 Galactose metabolism - Danio rerio (zebrafish); dre00500 Starch and sucrose metabolism - Danio rerio (zebrafish); dre00520 Amino sugar and nucleotide sugar metabolism - Danio rerio (zebrafish); dre00524 Neomycin, kanamycin and gentamicin biosynthesis - Dani…	PF00349; PF03727	Hexokinase; Hexokinase	G	KOG1369	Hexokinase
F02_transcript_6245	fkbp5, si:zc263a23.8, wu:fc31g11, wu:fl87b03, zgc:64082; FK506 binding protein 5 (EC:5.2.1.8); K09571 FK506-binding protein 4/5 [EC:5.2.1.8] (A)	51.335	1.5	1	1	1	0.771	0.801	0.791	1.298	1.226	1.156	1.557	0.00023681	cytoplasm	GO:0000413 protein peptidyl-prolyl isomerization; GO:0003008 system process; GO:0006457 protein folding; GO:0006464 cellular protein modification process; GO:0006807 nitrogen compound metabolic process; GO:0007275 multicellular organism development; GO:0007399 nervous system development; GO:0007422 peripheral nervous system development; GO:0007600 sensory perception; GO:0007601 visual perception;…	GO:0005622 intracellular; GO:0005623 cell; GO:0005634 nucleus; GO:0005654 nucleoplasm; GO:0005737 cytoplasm; GO:0005829 cytosol; GO:0005886 plasma membrane; GO:0016020 membrane; GO:0016027 inaD signaling complex; GO:0016028 rhabdomere; GO:0019897 extrinsic component of plasma membrane; GO:0019898 extrinsic component of membrane; GO:0031974 membrane-enclosed lumen; GO:0031981 nuclear lumen; GO:003…	GO:0003755 peptidyl-prolyl cis-trans isomerase activity; GO:0003824 catalytic activity; GO:0005488 binding; GO:0005515 protein binding; GO:0005527 macrolide binding; GO:0005528 FK506 binding; GO:0008144 drug binding; GO:0016853 isomerase activity; GO:0016859 cis-trans isomerase activity; GO:0031072 heat shock protein binding; GO:0051879 Hsp90 protein binding; GO:0097159 organic cyclic compound bi…	K09571	FKBP4_5; FK506-binding protein 4/5 [EC:5.2.1.8]		PF00254	FKBP-type peptidyl-prolyl cis-trans isomerase	O	KOG0543	FKBP-type peptidyl-prolyl cis-trans isomerase
F02_transcript_20881	zgc:158870; K06752 major histocompatibility complex, class II (A)	28.441	15.1	4	5	2	0.825	0.741	0.807	1.127	1.341	1.213	1.551	0.00189522	extracellular	GO:0001817 regulation of cytokine production; GO:0001819 positive regulation of cytokine production; GO:0002253 activation of immune response; GO:0002376 immune system process; GO:0002429 immune response-activating cell surface receptor signaling pathway; GO:0002478 antigen processing and presentation of exogenous peptide antigen; GO:0002495 antigen processing and presentation of peptide antigen …	GO:0000139 Golgi membrane; GO:0000323 lytic vacuole; GO:0005622 intracellular; GO:0005623 cell; GO:0005737 cytoplasm; GO:0005764 lysosome; GO:0005765 lysosomal membrane; GO:0005768 endosome; GO:0005773 vacuole; GO:0005774 vacuolar membrane; GO:0005783 endoplasmic reticulum; GO:0005789 endoplasmic reticulum membrane; GO:0005794 Golgi apparatus; GO:0005798 Golgi-associated vesicle; GO:0005802 trans…	GO:0003823 antigen binding; GO:0005488 binding; GO:0033218 amide binding; GO:0042277 peptide binding; GO:0042605 peptide antigen binding;	K06752	MHC2; major histocompatibility complex, class II	dre04145 Phagosome - Danio rerio (zebrafish); dre04514 Cell adhesion molecules (CAMs) - Danio rerio (zebrafish); dre04672 Intestinal immune network for IgA production - Danio rerio (zebrafish); dre05168 Herpes simplex virus 1 infection - Danio rerio (zebrafish);	PF00969; PF07654	Class II histocompatibility antigen, beta domain; Immunoglobulin C1-set domain
F02_transcript_25465	zgc:153855; si:dkey-180p18.9; K00011 aldehyde reductase [EC:1.1.1.21] (A)	35.585	31	12	17	3	0.817	0.791	0.755	1.213	1.238	1.208	1.548	5.7145e-05	cytoplasm				K00011	AKR1B; aldehyde reductase [EC:1.1.1.21]	dre00040 Pentose and glucuronate interconversions - Danio rerio (zebrafish); dre00051 Fructose and mannose metabolism - Danio rerio (zebrafish); dre00052 Galactose metabolism - Danio rerio (zebrafish); dre00561 Glycerolipid metabolism - Danio rerio (zebrafish); dre00790 Folate biosynthesis - Danio rerio (zebrafish); dre01100 Metabolic pathways - Danio rerio (zebrafish);	PF00248	Aldo/keto reductase family	S	KOG1577	Aldo/keto reductase family proteins
F02_transcript_17860	interferon-induced GTP-binding protein Mx1 [Bos taurus]	49.26	6.2	2	2	2	0.736	0.807	0.827	1.375	1.059	1.232	1.547	0.0066786	cytoplasm	GO:0000266 mitochondrial fission; GO:0002252 immune effector process; GO:0002376 immune system process; GO:0003373 dynamin family protein polymerization involved in membrane fission; GO:0003374 dynamin family protein polymerization involved in mitochondrial fission; GO:0006950 response to stress; GO:0006952 defense response; GO:0006955 immune response; GO:0006996 organelle organization; GO:000700…	GO:0005622 intracellular; GO:0005623 cell; GO:0005737 cytoplasm; GO:0005739 mitochondrion; GO:0005740 mitochondrial envelope; GO:0016020 membrane; GO:0031090 organelle membrane; GO:0031966 mitochondrial membrane; GO:0031967 organelle envelope; GO:0031975 envelope; GO:0043226 organelle; GO:0043227 membrane-bounded organelle; GO:0043229 intracellular organelle; GO:0043231 intracellular membrane-bou…	GO:0003824 catalytic activity; GO:0003924 GTPase activity; GO:0005488 binding; GO:0005515 protein binding; GO:0008017 microtubule binding; GO:0008092 cytoskeletal protein binding; GO:0015631 tubulin binding; GO:0016462 pyrophosphatase activity; GO:0016787 hydrolase activity; GO:0016817 hydrolase activity, acting on acid anhydrides; GO:0016818 hydrolase activity, acting on acid anhydrides, in phos…				PF00350	Dynamin family	U	KOG0446	Vacuolar sorting protein VPS1, dynamin, and related proteins
F02_transcript_6673	MORC family CW-type zinc finger protein 3-like [Stylophora pistillata]	84.614	4.1	3	5	3	0.814	0.746	0.818	1.168	1.414	1.094	1.546	0.0064619	cytoplasm							PF13589; PF07496	Histidine kinase-, DNA gyrase B-, and HSP90-like ATPase; CW-type Zinc Finger	D	KOG1845	MORC family ATPases
F02_transcript_5961	cdh1, E-cadherin; cadherin 1, type 1, E-cadherin (epithelial); K05689 cadherin 1, type 1, E-cadherin (A)	100.3	29.1	22	36	4	0.85	0.711	0.811	1.07	1.012	1.573	1.541	0.049104	peroxisome	GO:0000003 reproduction; GO:0000902 cell morphogenesis; GO:0000904 cell morphogenesis involved in differentiation; GO:0001101 response to acid chemical; GO:0001701 in utero embryonic development; GO:0001817 regulation of cytokine production; GO:0001818 negative regulation of cytokine production; GO:0001824 blastocyst development; GO:0001825 blastocyst formation; GO:0001829 trophectodermal cell di…	GO:0005576 extracellular region; GO:0005622 intracellular; GO:0005623 cell; GO:0005737 cytoplasm; GO:0005768 endosome; GO:0005794 Golgi apparatus; GO:0005802 trans-Golgi network; GO:0005856 cytoskeleton; GO:0005886 plasma membrane; GO:0005901 caveola; GO:0005911 cell-cell junction; GO:0005912 adherens junction; GO:0005913 cell-cell adherens junction; GO:0009898 cytoplasmic side of plasma membrane…	GO:0005488 binding; GO:0005509 calcium ion binding; GO:0005515 protein binding; GO:0008013 beta-catenin binding; GO:0008092 cytoskeletal protein binding; GO:0019899 enzyme binding; GO:0019902 phosphatase binding; GO:0019903 protein phosphatase binding; GO:0019904 protein domain specific binding; GO:0030506 ankyrin binding; GO:0032794 GTPase activating protein binding; GO:0042802 identical protein…	K05689	CDH1, CDHE, CD324; cadherin 1, type 1, E-cadherin	dre04371 Apelin signaling pathway - Danio rerio (zebrafish); dre04514 Cell adhesion molecules (CAMs) - Danio rerio (zebrafish); dre04520 Adherens junction - Danio rerio (zebrafish);	PF08758; PF00028	Cadherin prodomain like; Cadherin domain	S	KOG3594	FOG: Cadherin repeats
F02_transcript_8471	galectin-4 [Homo sapiens]	101.34	30.4	24	96	19	0.777	0.817	0.779	1.206	1.209	1.242	1.541	2.0658e-05	cytoplasm	GO:0007155 cell adhesion; GO:0022610 biological adhesion;	GO:0005576 extracellular region; GO:0005615 extracellular space; GO:0005622 intracellular; GO:0005623 cell; GO:0005737 cytoplasm; GO:0005829 cytosol; GO:0005886 plasma membrane; GO:0016020 membrane; GO:0044421 extracellular region part; GO:0044424 intracellular part; GO:0044444 cytoplasmic part; GO:0044464 cell part; GO:0071944 cell periphery;	GO:0005488 binding; GO:0016936 galactoside binding; GO:0030246 carbohydrate binding; GO:0097367 carbohydrate derivative binding;				PF00337	Galactoside-binding lectin	W	KOG3587	Galectin, galactose-binding lectin
F02_transcript_28882	Receptor-type tyrosine-protein phosphatase F [Stylophora pistillata]	19.727	14.9	3	7	3	0.817	0.784	0.724	1.174	1.287	1.117	1.539	0.00139826	extracellular							PF00754	F5/8 type C domain
F02_transcript_19235	RAC-beta serine/threonine-protein kinase-like; K04456 RAC serine/threonine-protein kinase [EC:2.7.11.1] (A)	55.711	13.3	5	5	3	0.743	0.83	0.812	0.854	1.264	1.553	1.539	0.087197	cytoplasm	GO:0000003 reproduction; GO:0000768 syncytium formation by plasma membrane fusion; GO:0001505 regulation of neurotransmitter levels; GO:0001558 regulation of cell growth; GO:0001667 ameboidal-type cell migration; GO:0001932 regulation of protein phosphorylation; GO:0001934 positive regulation of protein phosphorylation; GO:0002028 regulation of sodium ion transport; GO:0002682 regulation of immun…	GO:0001726 ruffle; GO:0005622 intracellular; GO:0005623 cell; GO:0005634 nucleus; GO:0005654 nucleoplasm; GO:0005737 cytoplasm; GO:0005829 cytosol; GO:0005886 plasma membrane; GO:0005938 cell cortex; GO:0009898 cytoplasmic side of plasma membrane; GO:0012505 endomembrane system; GO:0016020 membrane; GO:0030141 secretory granule; GO:0030424 axon; GO:0030425 dendrite; GO:0031252 cell leading edge; …	GO:0000166 nucleotide binding; GO:0003824 catalytic activity; GO:0004672 protein kinase activity; GO:0004674 protein serine/threonine kinase activity; GO:0005080 protein kinase C binding; GO:0005488 binding; GO:0005515 protein binding; GO:0005516 calmodulin binding; GO:0005524 ATP binding; GO:0005543 phospholipid binding; GO:0005547 phosphatidylinositol-3,4,5-trisphosphate binding; GO:0008144 dru…	K04456	AKT; RAC serine/threonine-protein kinase [EC:2.7.11.1]	dre04010 MAPK signaling pathway - Danio rerio (zebrafish); dre04012 ErbB signaling pathway - Danio rerio (zebrafish); dre04068 FoxO signaling pathway - Danio rerio (zebrafish); dre04140 Autophagy - animal - Danio rerio (zebrafish); dre04150 mTOR signaling pathway - Danio rerio (zebrafish); dre04210 Apoptosis - Danio rerio (zebrafish); dre04218 Cellular senescence - Danio rerio (zebrafish); dre042…	PF00169; PF00069	PH domain; Protein kinase domain	T	KOG0690	Serine/threonine protein kinase
F02_transcript_8054	GPI-anchor transamidase-like; K05290 phosphatidylinositol glycan, class K [EC:2.6.-.-] (A)	44.441	6.7	2	2	2	0.856	0.642	0.896	1.063	1.145	1.45	1.528	0.038562	plasma membrane	GO:0006464 cellular protein modification process; GO:0006497 protein lipidation; GO:0006505 GPI anchor metabolic process; GO:0006506 GPI anchor biosynthetic process; GO:0006629 lipid metabolic process; GO:0006643 membrane lipid metabolic process; GO:0006644 phospholipid metabolic process; GO:0006650 glycerophospholipid metabolic process; GO:0006661 phosphatidylinositol biosynthetic process; GO:00…	GO:0005622 intracellular; GO:0005623 cell; GO:0005737 cytoplasm; GO:0005783 endoplasmic reticulum; GO:0005789 endoplasmic reticulum membrane; GO:0012505 endomembrane system; GO:0016020 membrane; GO:0016021 integral component of membrane; GO:0030176 integral component of endoplasmic reticulum membrane; GO:0031224 intrinsic component of membrane; GO:0031227 intrinsic component of endoplasmic reticu…	GO:0003756 protein disulfide isomerase activity; GO:0003824 catalytic activity; GO:0003923 GPI-anchor transamidase activity; GO:0016787 hydrolase activity; GO:0016853 isomerase activity; GO:0016860 intramolecular oxidoreductase activity; GO:0016864 intramolecular oxidoreductase activity, transposing S-S bonds;	K05290	PIGK; phosphatidylinositol glycan, class K [EC:2.6.-.-]	dre00563 Glycosylphosphatidylinositol (GPI)-anchor biosynthesis - Danio rerio (zebrafish); dre01100 Metabolic pathways - Danio rerio (zebrafish);			O	KOG1349	Gpi-anchor transamidase
F02_transcript_10397	cars, sb:cb71; cysteinyl-tRNA synthetase (EC:6.1.1.16); K01883 cysteinyl-tRNA synthetase [EC:6.1.1.16] (A)	69.386	34	17	28	2	0.893	0.791	0.706	1.44	1.109	1.101	1.527	0.0195632	cytoplasm	GO:0006082 organic acid metabolic process; GO:0006139 nucleobase-containing compound metabolic process; GO:0006399 tRNA metabolic process; GO:0006412 translation; GO:0006418 tRNA aminoacylation for protein translation; GO:0006423 cysteinyl-tRNA aminoacylation; GO:0006518 peptide metabolic process; GO:0006520 cellular amino acid metabolic process; GO:0006725 cellular aromatic compound metabolic pr…	GO:0005622 intracellular; GO:0005623 cell; GO:0005737 cytoplasm; GO:0005829 cytosol; GO:0044424 intracellular part; GO:0044444 cytoplasmic part; GO:0044464 cell part;	GO:0000049 tRNA binding; GO:0000166 nucleotide binding; GO:0003676 nucleic acid binding; GO:0003723 RNA binding; GO:0003824 catalytic activity; GO:0004812 aminoacyl-tRNA ligase activity; GO:0004817 cysteine-tRNA ligase activity; GO:0005488 binding; GO:0005515 protein binding; GO:0005524 ATP binding; GO:0008144 drug binding; GO:0016874 ligase activity; GO:0016875 ligase activity, forming carbon-ox…	K01883	CARS, cysS; cysteinyl-tRNA synthetase [EC:6.1.1.16]	dre00970 Aminoacyl-tRNA biosynthesis - Danio rerio (zebrafish);			J	KOG2007	Cysteinyl-tRNA synthetase
F02_transcript_6776	Uncharacterized protein	24.834	4	1	4	1	0.792	0.979	0.627	1.061	1.518	1.081	1.526	0.070397	cytoplasm	GO:0001501 skeletal system development; GO:0006996 organelle organization; GO:0007010 cytoskeleton organization; GO:0007015 actin filament organization; GO:0007275 multicellular organism development; GO:0009653 anatomical structure morphogenesis; GO:0009887 animal organ morphogenesis; GO:0009987 cellular process; GO:0010721 negative regulation of cell development; GO:0016043 cellular component or…	GO:0005622 intracellular; GO:0005623 cell; GO:0005856 cytoskeleton; GO:0015629 actin cytoskeleton; GO:0032432 actin filament bundle; GO:0043226 organelle; GO:0043228 non-membrane-bounded organelle; GO:0043229 intracellular organelle; GO:0043232 intracellular non-membrane-bounded organelle; GO:0044422 organelle part; GO:0044424 intracellular part; GO:0044430 cytoskeletal part; GO:0044446 intracell…	GO:0005488 binding; GO:0005515 protein binding; GO:0008092 cytoskeletal protein binding; GO:0031005 filamin binding;
F02_transcript_11482	guanylate kinase-like; K00942 guanylate kinase [EC:2.7.4.8] (A)	22.079	14.1	2	2	2	0.902	0.587	0.908	1.154	1.291	1.211	1.525	0.040739	cytoplasm	GO:0006139 nucleobase-containing compound metabolic process; GO:0006163 purine nucleotide metabolic process; GO:0006164 purine nucleotide biosynthetic process; GO:0006185 dGDP biosynthetic process; GO:0006725 cellular aromatic compound metabolic process; GO:0006753 nucleoside phosphate metabolic process; GO:0006793 phosphorus metabolic process; GO:0006796 phosphate-containing compound metabolic p…	GO:0005622 intracellular; GO:0005623 cell; GO:0005737 cytoplasm; GO:0005829 cytosol; GO:0044424 intracellular part; GO:0044444 cytoplasmic part; GO:0044464 cell part;	GO:0003824 catalytic activity; GO:0004385 guanylate kinase activity; GO:0016301 kinase activity; GO:0016740 transferase activity; GO:0016772 transferase activity, transferring phosphorus-containing groups; GO:0016776 phosphotransferase activity, phosphate group as acceptor; GO:0019205 nucleobase-containing compound kinase activity; GO:0050145 nucleoside phosphate kinase activity;	K00942	E2.7.4.8, gmk; guanylate kinase [EC:2.7.4.8]	dre00230 Purine metabolism - Danio rerio (zebrafish); dre01100 Metabolic pathways - Danio rerio (zebrafish);	PF00625	Guanylate kinase	F	KOG0707	Guanylate kinase
F02_transcript_29783	galectin-1 [Sus scrofa]	14.952	68.7	8	172	8	0.828	0.791	0.778	1.24	1.247	1.168	1.525	0.000116788	cytoplasm							PF00337	Galactoside-binding lectin	W	KOG3587	Galectin, galactose-binding lectin
F02_transcript_7182	Uncharacterized protein	96.438	5.6	3	4	3	0.842	0.794	0.746	1.093	1.255	1.281	1.524	0.0023192	cytoplasm,nucleus
F02_transcript_21010	metalloproteinase inhibitor 2 precursor [Mus musculus]	24.722	10.5	2	2	2	0.783	0.801	0.814	1.096	1.316	1.24	1.523	0.00161696	extracellular	GO:0000003 reproduction; GO:0001775 cell activation; GO:0001932 regulation of protein phosphorylation; GO:0001934 positive regulation of protein phosphorylation; GO:0002252 immune effector process; GO:0002263 cell activation involved in immune response; GO:0002274 myeloid leukocyte activation; GO:0002275 myeloid cell activation involved in immune response; GO:0002283 neutrophil activation involve…	GO:0005576 extracellular region; GO:0005604 basement membrane; GO:0005615 extracellular space; GO:0005622 intracellular; GO:0005623 cell; GO:0005737 cytoplasm; GO:0009986 cell surface; GO:0012505 endomembrane system; GO:0030141 secretory granule; GO:0030424 axon; GO:0030426 growth cone; GO:0030427 site of polarized growth; GO:0031012 extracellular matrix; GO:0031410 cytoplasmic vesicle; GO:003197…	GO:0002020 protease binding; GO:0004857 enzyme inhibitor activity; GO:0004866 endopeptidase inhibitor activity; GO:0005102 receptor binding; GO:0005178 integrin binding; GO:0005488 binding; GO:0005515 protein binding; GO:0008047 enzyme activator activity; GO:0008191 metalloendopeptidase inhibitor activity; GO:0008270 zinc ion binding; GO:0019899 enzyme binding; GO:0030234 enzyme regulator activit…	K22583			PF00965	Tissue inhibitor of metalloproteinase	O	KOG4745	Metalloproteinase inhibitor TIMP and related proteins
F02_transcript_1918	itga6a, im:6897425, itga6, si:dkey-32o22.1, wu:fb80g02; integrin, alpha 6a; K06485 integrin alpha 6 (A)	69.083	2.7	2	2	2	0.797	0.79	0.81	1.218	0.994	1.432	1.52	0.061256	cytoplasm	GO:0000003 reproduction; GO:0000902 cell morphogenesis; GO:0000904 cell morphogenesis involved in differentiation; GO:0001655 urogenital system development; GO:0001667 ameboidal-type cell migration; GO:0001764 neuron migration; GO:0001894 tissue homeostasis; GO:0002009 morphogenesis of an epithelium; GO:0002119 nematode larval development; GO:0002164 larval development; GO:0002165 instar larval o…	GO:0001891 phagocytic cup; GO:0005576 extracellular region; GO:0005604 basement membrane; GO:0005623 cell; GO:0005886 plasma membrane; GO:0005887 integral component of plasma membrane; GO:0005911 cell-cell junction; GO:0005912 adherens junction; GO:0005913 cell-cell adherens junction; GO:0005924 cell-substrate adherens junction; GO:0005925 focal adhesion; GO:0008305 integrin complex; GO:0009897 e…	GO:0004888 transmembrane signaling receptor activity; GO:0005102 receptor binding; GO:0005178 integrin binding; GO:0005488 binding; GO:0005515 protein binding; GO:0005520 insulin-like growth factor binding; GO:0019838 growth factor binding; GO:0031994 insulin-like growth factor I binding; GO:0038023 signaling receptor activity; GO:0038132 neuregulin binding; GO:0043236 laminin binding; GO:0044877…	K06485	ITGA6, CD49f; integrin alpha 6	dre04510 Focal adhesion - Danio rerio (zebrafish); dre04512 ECM-receptor interaction - Danio rerio (zebrafish); dre04514 Cell adhesion molecules (CAMs) - Danio rerio (zebrafish); dre04810 Regulation of actin cytoskeleton - Danio rerio (zebrafish);			W	KOG3637	Vitronectin receptor, alpha subunit
F02_transcript_1011	H(+)/Cl(-) exchange transporter 3-like; K05012 chloride channel 3/4/5 (A)	75.512	2.9	2	2	2	0.853	0.816	0.73	1.239	1.202	1.206	1.52	0.00088087	plasma membrane	GO:0001894 tissue homeostasis; GO:0001895 retina homeostasis; GO:0006810 transport; GO:0006811 ion transport; GO:0006812 cation transport; GO:0006820 anion transport; GO:0006821 chloride transport; GO:0006873 cellular ion homeostasis; GO:0006884 cell volume homeostasis; GO:0006885 regulation of pH; GO:0006897 endocytosis; GO:0006909 phagocytosis; GO:0006911 phagocytosis, engulfment; GO:0006996 or…	GO:0005622 intracellular; GO:0005623 cell; GO:0005737 cytoplasm; GO:0005768 endosome; GO:0005769 early endosome; GO:0005770 late endosome; GO:0005794 Golgi apparatus; GO:0005886 plasma membrane; GO:0005887 integral component of plasma membrane; GO:0008021 synaptic vesicle; GO:0009897 external side of plasma membrane; GO:0009986 cell surface; GO:0010008 endosome membrane; GO:0012505 endomembrane s…	GO:0005215 transporter activity; GO:0005216 ion channel activity; GO:0005225 volume-sensitive anion channel activity; GO:0005244 voltage-gated ion channel activity; GO:0005247 voltage-gated chloride channel activity; GO:0005253 anion channel activity; GO:0005254 chloride channel activity; GO:0005488 binding; GO:0005515 protein binding; GO:0008308 voltage-gated anion channel activity; GO:0008509 a…	K05012	CLCN3_4_5; chloride channel 3/4/5				P	KOG0475	Cl- channel CLC-3 and related proteins (CLC superfamily)
F02_transcript_14259	pdia4, cai, wu:fd20c07, zgc:113965, zgc:136625, zgc:56014, zgc:77773; protein disulfide isomerase family A, member 4 (EC:5.3.4.1); K09582 protein disulfide-isomerase A4 [EC:5.3.4.1] (A)	72.431	17.8	10	17	10	0.734	0.757	0.907	1.19	1.189	1.263	1.519	0.0036173	extracellular	GO:0002790 peptide secretion; GO:0006457 protein folding; GO:0006810 transport; GO:0006950 response to stress; GO:0008104 protein localization; GO:0008152 metabolic process; GO:0009306 protein secretion; GO:0009987 cellular process; GO:0015031 protein transport; GO:0015833 peptide transport; GO:0032940 secretion by cell; GO:0033036 macromolecule localization; GO:0033554 cellular response to stres…	GO:0005576 extracellular region; GO:0005615 extracellular space; GO:0005622 intracellular; GO:0005623 cell; GO:0005737 cytoplasm; GO:0005783 endoplasmic reticulum; GO:0005788 endoplasmic reticulum lumen; GO:0005790 smooth endoplasmic reticulum; GO:0009986 cell surface; GO:0012505 endomembrane system; GO:0031974 membrane-enclosed lumen; GO:0032991 macromolecular complex; GO:0034663 endoplasmic ret…	GO:0003756 protein disulfide isomerase activity; GO:0003824 catalytic activity; GO:0015036 disulfide oxidoreductase activity; GO:0015037 peptide disulfide oxidoreductase activity; GO:0016491 oxidoreductase activity; GO:0016667 oxidoreductase activity, acting on a sulfur group of donors; GO:0016853 isomerase activity; GO:0016860 intramolecular oxidoreductase activity; GO:0016864 intramolecular oxi…	K09582	PDIA4, ERP72; protein disulfide-isomerase A4 [EC:5.3.4.1]	dre04141 Protein processing in endoplasmic reticulum - Danio rerio (zebrafish);	PF00085; PF13848	Thioredoxin; Thioredoxin-like domain	O	KOG0190	Protein disulfide isomerase (prolyl 4-hydroxylase beta subunit)
F02_transcript_14908	acid ceramidase-like; K12348 acid ceramidase [EC:3.5.1.23] (A)	44.813	9.6	4	6	4	0.772	0.751	0.844	1.332	1.177	1.077	1.515	0.0043448	extracellular	GO:0001775 cell activation; GO:0002252 immune effector process; GO:0002263 cell activation involved in immune response; GO:0002274 myeloid leukocyte activation; GO:0002275 myeloid cell activation involved in immune response; GO:0002283 neutrophil activation involved in immune response; GO:0002366 leukocyte activation involved in immune response; GO:0002376 immune system process; GO:0002443 leukoc…	GO:0000323 lytic vacuole; GO:0005576 extracellular region; GO:0005615 extracellular space; GO:0005622 intracellular; GO:0005623 cell; GO:0005737 cytoplasm; GO:0005764 lysosome; GO:0005773 vacuole; GO:0005775 vacuolar lumen; GO:0012505 endomembrane system; GO:0030141 secretory granule; GO:0031410 cytoplasmic vesicle; GO:0031974 membrane-enclosed lumen; GO:0031982 vesicle; GO:0043202 lysosomal lume…	GO:0003824 catalytic activity; GO:0016787 hydrolase activity; GO:0016810 hydrolase activity, acting on carbon-nitrogen (but not peptide) bonds; GO:0016811 hydrolase activity, acting on carbon-nitrogen (but not peptide) bonds, in linear amides; GO:0017040 ceramidase activity;	K12348	ASAH1; acid ceramidase [EC:3.5.1.23]	dre00600 Sphingolipid metabolism - Danio rerio (zebrafish); dre01100 Metabolic pathways - Danio rerio (zebrafish); dre04142 Lysosome - Danio rerio (zebrafish);	PF02275	Linear amide C-N hydrolases, choloylglycine hydrolase family
F02_transcript_15548	tescb, zgc:77891; tescalcin b; K17612 calcineurin B homologous protein 3 (A)	16.159	43.2	5	6	5	0.86	0.739	0.835	1.258	1.179	1.208	1.498	0.00126381	cytoplasm	GO:0000003 reproduction; GO:0001101 response to acid chemical; GO:0002028 regulation of sodium ion transport; GO:0002376 immune system process; GO:0002520 immune system development; GO:0002682 regulation of immune system process; GO:0002684 positive regulation of immune system process; GO:0002761 regulation of myeloid leukocyte differentiation; GO:0002763 positive regulation of myeloid leukocyte …	GO:0001726 ruffle; GO:0005622 intracellular; GO:0005623 cell; GO:0005634 nucleus; GO:0005737 cytoplasm; GO:0005829 cytosol; GO:0005886 plasma membrane; GO:0016020 membrane; GO:0030027 lamellipodium; GO:0031252 cell leading edge; GO:0042995 cell projection; GO:0043226 organelle; GO:0043227 membrane-bounded organelle; GO:0043229 intracellular organelle; GO:0043231 intracellular membrane-bounded org…	GO:0000287 magnesium ion binding; GO:0004857 enzyme inhibitor activity; GO:0005488 binding; GO:0005509 calcium ion binding; GO:0005515 protein binding; GO:0019208 phosphatase regulator activity; GO:0019212 phosphatase inhibitor activity; GO:0030234 enzyme regulator activity; GO:0042802 identical protein binding; GO:0042803 protein homodimerization activity; GO:0043167 ion binding; GO:0043169 cati…	K17612	TESC, CHP3; calcineurin B homologous protein 3				T	KOG0034	Ca2+/calmodulin-dependent protein phosphatase (calcineurin subunit B), EF-Hand superfamily protein
F02_transcript_21919	putative chaperone protein DnaK [Fasciola hepatica]	26.886	17	6	18	1	0.786	0.822	0.819	1.147	1.373	1.103	1.493	0.0045407	mitochondria	GO:0006810 transport; GO:0006950 response to stress; GO:0007275 multicellular organism development; GO:0007568 aging; GO:0008340 determination of adult lifespan; GO:0009266 response to temperature stimulus; GO:0009408 response to heat; GO:0009628 response to abiotic stimulus; GO:0010259 multicellular organism aging; GO:0016192 vesicle-mediated transport; GO:0016197 endosomal transport; GO:0016482…	GO:0005622 intracellular; GO:0005623 cell; GO:0005634 nucleus; GO:0005737 cytoplasm; GO:0005829 cytosol; GO:0043226 organelle; GO:0043227 membrane-bounded organelle; GO:0043229 intracellular organelle; GO:0043231 intracellular membrane-bounded organelle; GO:0044424 intracellular part; GO:0044444 cytoplasmic part; GO:0044464 cell part;	GO:0003824 catalytic activity; GO:0005488 binding; GO:0005515 protein binding; GO:0016462 pyrophosphatase activity; GO:0016787 hydrolase activity; GO:0016817 hydrolase activity, acting on acid anhydrides; GO:0016818 hydrolase activity, acting on acid anhydrides, in phosphorus-containing anhydrides; GO:0016887 ATPase activity; GO:0017111 nucleoside-triphosphatase activity;	K03283	HSPA1s; heat shock 70kDa protein 1/2/6/8	dre03040 Spliceosome - Danio rerio (zebrafish); dre04010 MAPK signaling pathway - Danio rerio (zebrafish); dre04141 Protein processing in endoplasmic reticulum - Danio rerio (zebrafish); dre04144 Endocytosis - Danio rerio (zebrafish);			O	KOG0101	Molecular chaperones HSP70/HSC70, HSP70 superfamily
F02_transcript_29672	galectin-1 [Sus scrofa]	16.305	54.9	12	128	12	0.806	0.806	0.8	1.168	1.257	1.177	1.493	0.0034036	cytoplasm							PF00337	Galactoside-binding lectin	W	KOG3587	Galectin, galactose-binding lectin
F02_transcript_23288	cmpk2, si:ch211-276e8.3; cytidine monophosphate (UMP-CMP) kinase 2, mitochondrial; K13809 UMP-CMP kinase 2, mitochondrial [EC:2.7.4.14] (A)	32.302	26.1	6	8	6	0.825	0.772	0.824	1.183	1.101	1.317	1.487	0.0022022	mitochondria	GO:0002237 response to molecule of bacterial origin; GO:0006139 nucleobase-containing compound metabolic process; GO:0006165 nucleoside diphosphate phosphorylation; GO:0006220 pyrimidine nucleotide metabolic process; GO:0006221 pyrimidine nucleotide biosynthetic process; GO:0006227 dUDP biosynthetic process; GO:0006233 dTDP biosynthetic process; GO:0006235 dTTP biosynthetic process; GO:0006725 ce…	GO:0005622 intracellular; GO:0005623 cell; GO:0005737 cytoplasm; GO:0005739 mitochondrion; GO:0043226 organelle; GO:0043227 membrane-bounded organelle; GO:0043229 intracellular organelle; GO:0043231 intracellular membrane-bounded organelle; GO:0044424 intracellular part; GO:0044444 cytoplasmic part; GO:0044464 cell part;	GO:0003824 catalytic activity; GO:0004127 cytidylate kinase activity; GO:0004550 nucleoside diphosphate kinase activity; GO:0004798 thymidylate kinase activity; GO:0009041 uridylate kinase activity; GO:0016301 kinase activity; GO:0016740 transferase activity; GO:0016772 transferase activity, transferring phosphorus-containing groups; GO:0016776 phosphotransferase activity, phosphate group as acce…	K13809	CMPK2; UMP-CMP kinase 2, mitochondrial [EC:2.7.4.14]	dre00240 Pyrimidine metabolism - Danio rerio (zebrafish); dre01100 Metabolic pathways - Danio rerio (zebrafish);			F	KOG3327	Thymidylate kinase/adenylate kinase
F02_transcript_20242	bpgm, zgc:92230; 2,3-bisphosphoglycerate mutase; K01837 bisphosphoglycerate mutase [EC:5.4.2.4 5.4.2.11 3.1.3.13] (A)	28.943	22.8	4	5	4	0.865	0.755	0.787	1.232	1.127	1.218	1.486	0.00126162	cytoplasm	GO:0002262 myeloid cell homeostasis; GO:0002376 immune system process; GO:0002520 immune system development; GO:0005975 carbohydrate metabolic process; GO:0005996 monosaccharide metabolic process; GO:0006006 glucose metabolic process; GO:0006007 glucose catabolic process; GO:0006082 organic acid metabolic process; GO:0006090 pyruvate metabolic process; GO:0006091 generation of precursor metabolit…	GO:0005622 intracellular; GO:0005623 cell; GO:0005737 cytoplasm; GO:0005829 cytosol; GO:0044424 intracellular part; GO:0044444 cytoplasmic part; GO:0044464 cell part;	GO:0003824 catalytic activity; GO:0004082 bisphosphoglycerate mutase activity; GO:0004619 phosphoglycerate mutase activity; GO:0016853 isomerase activity; GO:0016866 intramolecular transferase activity; GO:0016868 intramolecular transferase activity, phosphotransferases; GO:0046538 2,3-bisphosphoglycerate-dependent phosphoglycerate mutase activity;	K01837	BPGM; bisphosphoglycerate/phosphoglycerate mutase [EC:5.4.2.4 5.4.2.11]	dre00010 Glycolysis / Gluconeogenesis - Danio rerio (zebrafish); dre00260 Glycine, serine and threonine metabolism - Danio rerio (zebrafish); dre01100 Metabolic pathways - Danio rerio (zebrafish);	PF00300	Histidine phosphatase superfamily (branch 1)	G	KOG0235	Phosphoglycerate mutase
F02_transcript_9561	interferon regulatory factor 3-like; K05411 interferon regulatory factor 3 (A)	50.516	9.8	4	4	2	0.641	0.844	0.943	1.293	1.049	1.262	1.484	0.038116	cytoplasm	GO:0000122 negative regulation of transcription from RNA polymerase II promoter; GO:0001816 cytokine production; GO:0001817 regulation of cytokine production; GO:0001818 negative regulation of cytokine production; GO:0001819 positive regulation of cytokine production; GO:0001959 regulation of cytokine-mediated signaling pathway; GO:0001961 positive regulation of cytokine-mediated signaling pathwa…	GO:0005622 intracellular; GO:0005623 cell; GO:0005634 nucleus; GO:0005737 cytoplasm; GO:0005829 cytosol; GO:0043226 organelle; GO:0043227 membrane-bounded organelle; GO:0043229 intracellular organelle; GO:0043231 intracellular membrane-bounded organelle; GO:0044424 intracellular part; GO:0044444 cytoplasmic part; GO:0044464 cell part;	GO:0000976 transcription regulatory region sequence-specific DNA binding; GO:0000977 RNA polymerase II regulatory region sequence-specific DNA binding; GO:0000978 RNA polymerase II core promoter proximal region sequence-specific DNA binding; GO:0000981 RNA polymerase II transcription factor activity, sequence-specific DNA binding; GO:0000982 transcription factor activity, RNA polymerase II core p…	K05411	IRF3; interferon regulatory factor 3	dre04620 Toll-like receptor signaling pathway - Danio rerio (zebrafish); dre04621 NOD-like receptor signaling pathway - Danio rerio (zebrafish); dre04622 RIG-I-like receptor signaling pathway - Danio rerio (zebrafish); dre04623 Cytosolic DNA-sensing pathway - Danio rerio (zebrafish); dre05168 Herpes simplex virus 1 infection - Danio rerio (zebrafish);	PF00605	Interferon regulatory factor transcription factor
F02_transcript_30368	Uncharacterized protein	5.8845	32	1	3	1	0.753	0.68	1.033	1.406	1.304	0.941	1.481	0.088901	cytoplasm							PF00337	Galactoside-binding lectin
F02_transcript_17669	HPGD; hydroxyprostaglandin dehydrogenase 15-(NAD); K00069 15-hydroxyprostaglandin dehydrogenase (NAD) [EC:1.1.1.141] (A)	14.466	67.7	7	29	4	0.835	0.837	0.8	1.187	1.201	1.252	1.472	5.987e-05	cytoplasm	GO:0000003 reproduction; GO:0001568 blood vessel development; GO:0001655 urogenital system development; GO:0001676 long-chain fatty acid metabolic process; GO:0001822 kidney development; GO:0001944 vasculature development; GO:0002237 response to molecule of bacterial origin; GO:0006082 organic acid metabolic process; GO:0006629 lipid metabolic process; GO:0006631 fatty acid metabolic process; GO:…	GO:0005576 extracellular region; GO:0005615 extracellular space; GO:0005622 intracellular; GO:0005623 cell; GO:0005634 nucleus; GO:0005654 nucleoplasm; GO:0005737 cytoplasm; GO:0005829 cytosol; GO:0031974 membrane-enclosed lumen; GO:0031981 nuclear lumen; GO:0043226 organelle; GO:0043227 membrane-bounded organelle; GO:0043229 intracellular organelle; GO:0043231 intracellular membrane-bounded orga…	GO:0000166 nucleotide binding; GO:0003824 catalytic activity; GO:0004888 transmembrane signaling receptor activity; GO:0004930 G-protein coupled receptor activity; GO:0004953 icosanoid receptor activity; GO:0004954 prostanoid receptor activity; GO:0004955 prostaglandin receptor activity; GO:0004957 prostaglandin E receptor activity; GO:0005488 binding; GO:0005515 protein binding; GO:0016404 15-hy…	K00069	HPGD; 15-hydroxyprostaglandin dehydrogenase (NAD) [EC:1.1.1.141]		PF00106	short chain dehydrogenase	Q	KOG4169	15-hydroxyprostaglandin dehydrogenase and related dehydrogenases
F02_transcript_22090	cytosolic non-specific dipeptidase-like; K08660 cytosolic nonspecific dipeptidase [EC:3.4.13.18] (A)	17.534	36.1	4	8	4	0.811	0.9	0.787	1.302	1.171	1.205	1.472	0.00167697	cytoplasm	GO:0006508 proteolysis; GO:0006518 peptide metabolic process; GO:0006575 cellular modified amino acid metabolic process; GO:0006749 glutathione metabolic process; GO:0006750 glutathione biosynthetic process; GO:0006790 sulfur compound metabolic process; GO:0006807 nitrogen compound metabolic process; GO:0008152 metabolic process; GO:0009058 biosynthetic process; GO:0009987 cellular process; GO:00…	GO:0005622 intracellular; GO:0005623 cell; GO:0005634 nucleus; GO:0005654 nucleoplasm; GO:0005737 cytoplasm; GO:0005829 cytosol; GO:0031974 membrane-enclosed lumen; GO:0031981 nuclear lumen; GO:0043226 organelle; GO:0043227 membrane-bounded organelle; GO:0043229 intracellular organelle; GO:0043231 intracellular membrane-bounded organelle; GO:0043233 organelle lumen; GO:0044422 organelle part; GO:…	GO:0003824 catalytic activity; GO:0004180 carboxypeptidase activity; GO:0008233 peptidase activity; GO:0008238 exopeptidase activity; GO:0016787 hydrolase activity; GO:0016805 dipeptidase activity; GO:0070011 peptidase activity, acting on L-amino acid peptides;	K08660	CNDP2; cytosolic nonspecific dipeptidase [EC:3.4.13.18]	dre00330 Arginine and proline metabolism - Danio rerio (zebrafish); dre00340 Histidine metabolism - Danio rerio (zebrafish); dre00410 beta-Alanine metabolism - Danio rerio (zebrafish); dre01100 Metabolic pathways - Danio rerio (zebrafish);			E	KOG2276	Metalloexopeptidases
F02_transcript_20668	SELENBP1; selenium binding protein 1; K17285 selenium-binding protein 1 (A)	29.484	49.6	10	12	10	0.774	0.79	0.843	1.122	1.228	1.174	1.464	0.00048075	cytoplasm	GO:0009987 cellular process; GO:0030154 cell differentiation; GO:0032502 developmental process; GO:0045444 fat cell differentiation; GO:0048869 cellular developmental process; GO:0050873 brown fat cell differentiation;	GO:0001650 fibrillar center; GO:0005622 intracellular; GO:0005623 cell; GO:0005634 nucleus; GO:0005730 nucleolus; GO:0031974 membrane-enclosed lumen; GO:0031981 nuclear lumen; GO:0043226 organelle; GO:0043227 membrane-bounded organelle; GO:0043228 non-membrane-bounded organelle; GO:0043229 intracellular organelle; GO:0043231 intracellular membrane-bounded organelle; GO:0043232 intracellular non-m…	GO:0005488 binding; GO:0008430 selenium binding;	K17285	SELENBP1; selenium-binding protein 1	dre00920 Sulfur metabolism - Danio rerio (zebrafish); dre01100 Metabolic pathways - Danio rerio (zebrafish);			P	KOG0918	Selenium-binding protein
F02_transcript_17215	uap1l1, zgc:56509; UDP-N-acetylglucosamine pyrophosphorylase 1, like 1 (EC:2.7.7.-); K00972 UDP-N-acetylglucosamine/UDP-N-acetylgalactosamine diphosphorylase [EC:2.7.7.23 2.7.7.83] (A)	56.769	42.6	19	25	6	0.851	0.769	0.821	1.195	1.19	1.187	1.463	0.0060167	cytoplasm	GO:0001700 embryonic development via the syncytial blastoderm; GO:0001838 embryonic epithelial tube formation; GO:0002009 morphogenesis of an epithelium; GO:0006022 aminoglycan metabolic process; GO:0006023 aminoglycan biosynthetic process; GO:0006030 chitin metabolic process; GO:0006031 chitin biosynthetic process; GO:0006034 cuticle chitin metabolic process; GO:0006035 cuticle chitin biosynthet…	GO:0005622 intracellular; GO:0005623 cell; GO:0005737 cytoplasm; GO:0005829 cytosol; GO:0044424 intracellular part; GO:0044444 cytoplasmic part; GO:0044464 cell part;	GO:0003824 catalytic activity; GO:0003977 UDP-N-acetylglucosamine diphosphorylase activity; GO:0016740 transferase activity; GO:0016772 transferase activity, transferring phosphorus-containing groups; GO:0016779 nucleotidyltransferase activity; GO:0070569 uridylyltransferase activity;	K00972	UAP1; UDP-N-acetylglucosamine/UDP-N-acetylgalactosamine diphosphorylase [EC:2.7.7.23 2.7.7.83]	dre00520 Amino sugar and nucleotide sugar metabolism - Danio rerio (zebrafish); dre01100 Metabolic pathways - Danio rerio (zebrafish);			M	KOG2388	UDP-N-acetylglucosamine pyrophosphorylase
F02_transcript_17558	ugp2a, si:ch73-233a22.2; UDP-glucose pyrophosphorylase 2a (EC:2.7.7.9); K00963 UTP--glucose-1-phosphate uridylyltransferase [EC:2.7.7.9] (A)	50.353	19.1	7	10	2	0.748	0.962	0.749	1.157	1.172	1.253	1.457	0.0118001	cytoplasm	GO:0000271 polysaccharide biosynthetic process; GO:0005975 carbohydrate metabolic process; GO:0005976 polysaccharide metabolic process; GO:0005977 glycogen metabolic process; GO:0005978 glycogen biosynthetic process; GO:0006011 UDP-glucose metabolic process; GO:0006065 UDP-glucuronate biosynthetic process; GO:0006073 cellular glucan metabolic process; GO:0006082 organic acid metabolic process; GO…	GO:0005622 intracellular; GO:0005623 cell; GO:0005737 cytoplasm; GO:0005829 cytosol; GO:0044424 intracellular part; GO:0044444 cytoplasmic part; GO:0044464 cell part;	GO:0000166 nucleotide binding; GO:0003824 catalytic activity; GO:0003983 UTP:glucose-1-phosphate uridylyltransferase activity; GO:0005488 binding; GO:0005515 protein binding; GO:0005536 glucose binding; GO:0016740 transferase activity; GO:0016772 transferase activity, transferring phosphorus-containing groups; GO:0016779 nucleotidyltransferase activity; GO:0019103 pyrimidine nucleotide binding; G…	K00963	UGP2, galU, galF; UTP--glucose-1-phosphate uridylyltransferase [EC:2.7.7.9]	dre00040 Pentose and glucuronate interconversions - Danio rerio (zebrafish); dre00052 Galactose metabolism - Danio rerio (zebrafish); dre00500 Starch and sucrose metabolism - Danio rerio (zebrafish); dre00520 Amino sugar and nucleotide sugar metabolism - Danio rerio (zebrafish); dre01100 Metabolic pathways - Danio rerio (zebrafish);			G	KOG2638	UDP-glucose pyrophosphorylase
F02_transcript_5628	protein unc-45 homolog B [Sus scrofa]	63.77	4.6	2	2	2	0.814	0.805	0.838	1.439	0.98	1.154	1.454	0.083736	cytoplasm	GO:0000003 reproduction; GO:0006457 protein folding; GO:0006950 response to stress; GO:0006996 organelle organization; GO:0007010 cytoskeleton organization; GO:0007275 multicellular organism development; GO:0007525 somatic muscle development; GO:0007610 behavior; GO:0009266 response to temperature stimulus; GO:0009408 response to heat; GO:0009628 response to abiotic stimulus; GO:0009653 anatomica…	GO:0005622 intracellular; GO:0005623 cell; GO:0005634 nucleus; GO:0005654 nucleoplasm; GO:0005737 cytoplasm; GO:0005794 Golgi apparatus; GO:0005829 cytosol; GO:0005886 plasma membrane; GO:0005938 cell cortex; GO:0012505 endomembrane system; GO:0016020 membrane; GO:0016604 nuclear body; GO:0016607 nuclear speck; GO:0031974 membrane-enclosed lumen; GO:0031981 nuclear lumen; GO:0032153 cell division…	GO:0005488 binding; GO:0005515 protein binding; GO:0019899 enzyme binding; GO:0031072 heat shock protein binding; GO:0031625 ubiquitin protein ligase binding; GO:0042802 identical protein binding; GO:0044389 ubiquitin-like protein ligase binding; GO:0051879 Hsp90 protein binding;	K21991	UNC45; protein unc-45				DO	KOG4151	Myosin assembly protein/sexual cycle protein and related proteins
F02_transcript_8624	protein-glutamine gamma-glutamyltransferase 2-like; K05622 transglutaminase 5 [EC:2.3.2.13] (A)	76.911	27	20	25	18	0.846	0.775	0.83	1.142	1.165	1.255	1.453	0.00067634	cytoplasm	GO:0006464 cellular protein modification process; GO:0006807 nitrogen compound metabolic process; GO:0007275 multicellular organism development; GO:0008152 metabolic process; GO:0008219 cell death; GO:0008544 epidermis development; GO:0009888 tissue development; GO:0009913 epidermal cell differentiation; GO:0009987 cellular process; GO:0012501 programmed cell death; GO:0019538 protein metabolic p…	GO:0005623 cell; GO:0005886 plasma membrane; GO:0016020 membrane; GO:0044464 cell part; GO:0071944 cell periphery;	GO:0003810 protein-glutamine gamma-glutamyltransferase activity; GO:0003824 catalytic activity; GO:0016740 transferase activity; GO:0016746 transferase activity, transferring acyl groups; GO:0016755 transferase activity, transferring amino-acyl groups;	K05622	TGM5; transglutaminase 5 [EC:2.3.2.13]		PF00868; PF00927	Transglutaminase family; Transglutaminase family, C-terminal ig like domain
F02_transcript_8902	claudin-23-like; K06087 claudin (A)	28.391	18.5	4	7	4	0.834	0.798	0.758	1.163	1.148	1.153	1.449	0.0055753	plasma membrane	GO:0007155 cell adhesion; GO:0016338 calcium-independent cell-cell adhesion via plasma membrane cell-adhesion molecules; GO:0022610 biological adhesion; GO:0098609 cell-cell adhesion; GO:0098742 cell-cell adhesion via plasma-membrane adhesion molecules;	GO:0005911 cell-cell junction; GO:0005923 bicellular tight junction; GO:0030054 cell junction; GO:0043296 apical junction complex; GO:0070160 occluding junction;	GO:0005488 binding; GO:0005515 protein binding; GO:0042802 identical protein binding;
F02_transcript_773	cbsb, cb442, cbs, wu:fb37g05, wu:fm61c07, wu:fq06c06, zgc:113704; cystathionine-beta-synthase b (EC:4.2.1.22); K01697 cystathionine beta-synthase [EC:4.2.1.22] (A)	64.557	37.1	18	25	18	0.791	0.8	0.872	1.202	1.186	1.179	1.448	0.00028483	cytoplasm	GO:0000003 reproduction; GO:0000096 sulfur amino acid metabolic process; GO:0000097 sulfur amino acid biosynthetic process; GO:0000098 sulfur amino acid catabolic process; GO:0001101 response to acid chemical; GO:0001501 skeletal system development; GO:0001503 ossification; GO:0001666 response to hypoxia; GO:0001932 regulation of protein phosphorylation; GO:0001958 endochondral ossification; GO:0…	GO:0005622 intracellular; GO:0005623 cell; GO:0005634 nucleus; GO:0005737 cytoplasm; GO:0005829 cytosol; GO:0043226 organelle; GO:0043227 membrane-bounded organelle; GO:0043229 intracellular organelle; GO:0043231 intracellular membrane-bounded organelle; GO:0044424 intracellular part; GO:0044444 cytoplasmic part; GO:0044464 cell part;	GO:0003824 catalytic activity; GO:0004122 cystathionine beta-synthase activity; GO:0004124 cysteine synthase activity; GO:0005488 binding; GO:0005515 protein binding; GO:0008144 drug binding; GO:0016491 oxidoreductase activity; GO:0016661 oxidoreductase activity, acting on other nitrogenous compounds as donors; GO:0016662 oxidoreductase activity, acting on other nitrogenous compounds as donors, c…	K01697	CBS; cystathionine beta-synthase [EC:4.2.1.22]	dre00260 Glycine, serine and threonine metabolism - Danio rerio (zebrafish); dre00270 Cysteine and methionine metabolism - Danio rerio (zebrafish); dre01100 Metabolic pathways - Danio rerio (zebrafish); dre01230 Biosynthesis of amino acids - Danio rerio (zebrafish);	PF00571	CBS domain	E	KOG1252	Cystathionine beta-synthase and related enzymes
F02_transcript_19027	IgM precursor [Bos taurus]	51.652	47.7	19	33	1	0.743	0.835	0.894	1.095	1.218	1.259	1.445	0.0057223	cytoplasm							PF07654; PF00047	Immunoglobulin C1-set domain; Immunoglobulin domain	P	KOG4475	FOG: Immunoglobin and related proteins
F02_transcript_29733	alpha-N-acetylgalactosamine-specific lectin-like isoform X1 [Stylophora pistillata]	18.734	31.7	6	262	1	0.87	0.865	0.692	1.084	1.164	1.24	1.437	0.0123975	extracellular				K06560	MRC, CD206, CD280; mannose receptor, C type	dre04145 Phagosome - Danio rerio (zebrafish);	PF00059	Lectin C-type domain	TV	KOG4297	C-type lectin
F02_transcript_1047	sphingomyelin phosphodiesterase-like; K12350 sphingomyelin phosphodiesterase [EC:3.1.4.12] (A)	68.82	4.8	2	2	2	0.865	0.931	0.687	1.192	1.254	1.115	1.434	0.0197151	plasma membrane	GO:0001932 regulation of protein phosphorylation; GO:0001933 negative regulation of protein phosphorylation; GO:0006469 negative regulation of protein kinase activity; GO:0006629 lipid metabolic process; GO:0006643 membrane lipid metabolic process; GO:0006644 phospholipid metabolic process; GO:0006664 glycolipid metabolic process; GO:0006665 sphingolipid metabolic process; GO:0006672 ceramide met…	GO:0000323 lytic vacuole; GO:0005576 extracellular region; GO:0005615 extracellular space; GO:0005622 intracellular; GO:0005623 cell; GO:0005737 cytoplasm; GO:0005764 lysosome; GO:0005765 lysosomal membrane; GO:0005768 endosome; GO:0005773 vacuole; GO:0005774 vacuolar membrane; GO:0005775 vacuolar lumen; GO:0005886 plasma membrane; GO:0012505 endomembrane system; GO:0016020 membrane; GO:0030141 s…	GO:0003824 catalytic activity; GO:0004620 phospholipase activity; GO:0004767 sphingomyelin phosphodiesterase activity; GO:0005488 binding; GO:0008081 phosphoric diester hydrolase activity; GO:0008270 zinc ion binding; GO:0016298 lipase activity; GO:0016787 hydrolase activity; GO:0016788 hydrolase activity, acting on ester bonds; GO:0042578 phosphoric ester hydrolase activity; GO:0043167 ion bindi…	K12350	SMPD1, ASM; sphingomyelin phosphodiesterase [EC:3.1.4.12]	dre00600 Sphingolipid metabolism - Danio rerio (zebrafish); dre01100 Metabolic pathways - Danio rerio (zebrafish); dre04142 Lysosome - Danio rerio (zebrafish); dre04217 Necroptosis - Danio rerio (zebrafish);	PF00149	Calcineurin-like phosphoesterase	I	KOG3770	Acid sphingomyelinase and PHM5 phosphate metabolism protein
F02_transcript_838	serine/threonine-protein kinase D2-like; K06070 protein kinase D [EC:2.7.11.13] (A)	105.25	1.6	2	2	2	0.876	0.864	0.748	1.116	1.246	1.198	1.431	0.0038773	nucleus	GO:0002376 immune system process; GO:0006464 cellular protein modification process; GO:0006468 protein phosphorylation; GO:0006793 phosphorus metabolic process; GO:0006796 phosphate-containing compound metabolic process; GO:0006807 nitrogen compound metabolic process; GO:0006950 response to stress; GO:0006952 defense response; GO:0006955 immune response; GO:0007154 cell communication; GO:0007165 …	GO:0005622 intracellular; GO:0005623 cell; GO:0005737 cytoplasm; GO:0005829 cytosol; GO:0005886 plasma membrane; GO:0009898 cytoplasmic side of plasma membrane; GO:0016020 membrane; GO:0032991 macromolecular complex; GO:0044424 intracellular part; GO:0044425 membrane part; GO:0044444 cytoplasmic part; GO:0044459 plasma membrane part; GO:0044464 cell part; GO:0061695 transferase complex, transferr…	GO:0003824 catalytic activity; GO:0004672 protein kinase activity; GO:0004674 protein serine/threonine kinase activity; GO:0005488 binding; GO:0005515 protein binding; GO:0016301 kinase activity; GO:0016740 transferase activity; GO:0016772 transferase activity, transferring phosphorus-containing groups; GO:0016773 phosphotransferase activity, alcohol group as acceptor; GO:0042802 identical protei…	K06070	PKD; protein kinase D [EC:2.7.11.13]		PF00130; PF00169; PF00069	Phorbol esters/diacylglycerol binding domain (C1 domain); PH domain; Protein kinase domain	T	KOG4236	Serine/threonine protein kinase PKC mu/PKD and related proteins
F02_transcript_6108	complement factor B-like; K01335 component factor B [EC:3.4.21.47] (A)	38.847	5.2	1	1	1	0.82	0.792	0.876	1.181	1.227	1.147	1.429	0.00054169	cytoplasm	GO:0002250 adaptive immune response; GO:0002252 immune effector process; GO:0002253 activation of immune response; GO:0002376 immune system process; GO:0002443 leukocyte mediated immunity; GO:0002449 lymphocyte mediated immunity; GO:0002455 humoral immune response mediated by circulating immunoglobulin; GO:0002460 adaptive immune response based on somatic recombination of immune receptors built f…	GO:0005576 extracellular region; GO:0005615 extracellular space; GO:0005623 cell; GO:0005886 plasma membrane; GO:0016020 membrane; GO:0044421 extracellular region part; GO:0044464 cell part; GO:0071944 cell periphery;	GO:0001848 complement binding; GO:0003824 catalytic activity; GO:0004175 endopeptidase activity; GO:0004252 serine-type endopeptidase activity; GO:0005488 binding; GO:0005515 protein binding; GO:0008233 peptidase activity; GO:0008236 serine-type peptidase activity; GO:0016787 hydrolase activity; GO:0017171 serine hydrolase activity; GO:0070011 peptidase activity, acting on L-amino acid peptides;	K01335	CFB; component factor B [EC:3.4.21.47]		PF00084; PF00092	Sushi domain (SCR repeat); von Willebrand factor type A domain	W	KOG3627	Trypsin
F02_transcript_19612	eukaryotic translation initiation factor 3 subunit D-like; K03251 translation initiation factor 3 subunit D (A)	43.364	18.1	4	5	4	0.75	0.746	1.016	1.207	1.243	1.136	1.428	0.02558	cytoplasm	GO:0002181 cytoplasmic translation; GO:0002183 cytoplasmic translational initiation; GO:0002191 cap-dependent translational initiation; GO:0006412 translation; GO:0006413 translational initiation; GO:0006417 regulation of translation; GO:0006446 regulation of translational initiation; GO:0006518 peptide metabolic process; GO:0006807 nitrogen compound metabolic process; GO:0008152 metabolic proces…	GO:0005622 intracellular; GO:0005623 cell; GO:0005634 nucleus; GO:0005737 cytoplasm; GO:0005829 cytosol; GO:0005852 eukaryotic translation initiation factor 3 complex; GO:0032991 macromolecular complex; GO:0043226 organelle; GO:0043227 membrane-bounded organelle; GO:0043229 intracellular organelle; GO:0043231 intracellular membrane-bounded organelle; GO:0044424 intracellular part; GO:0044444 cyto…	GO:0000339 RNA cap binding; GO:0003676 nucleic acid binding; GO:0003723 RNA binding; GO:0003729 mRNA binding; GO:0003743 translation initiation factor activity; GO:0005488 binding; GO:0005515 protein binding; GO:0008135 translation factor activity, RNA binding; GO:0097159 organic cyclic compound binding; GO:0098808 mRNA cap binding; GO:1901363 heterocyclic compound binding;	K03251	EIF3D; translation initiation factor 3 subunit D	dre03013 RNA transport - Danio rerio (zebrafish);			J	KOG2479	Translation initiation factor 3, subunit d (eIF-3d)
F02_transcript_686	mucin-2 precursor [Gallus gallus]	53.915	54	20	66	20	0.68	0.829	0.959	1.13	1.237	1.138	1.42	0.025663	extracellular	GO:0001894 tissue homeostasis; GO:0002064 epithelial cell development; GO:0003008 system process; GO:0006915 apoptotic process; GO:0007586 digestion; GO:0008219 cell death; GO:0008285 negative regulation of cell proliferation; GO:0009888 tissue development; GO:0009987 cellular process; GO:0010669 epithelial structure maintenance; GO:0010941 regulation of cell death; GO:0010942 positive regulation…	GO:0005576 extracellular region; GO:0031012 extracellular matrix; GO:0044421 extracellular region part; GO:0070701 mucus layer; GO:0070702 inner mucus layer; GO:0070703 outer mucus layer;					PF00007	Cystine-knot domain	VW	KOG1216	von Willebrand factor and related coagulation proteins
F02_transcript_27122	gstp1, cb356, wu:fa02f07, wu:fj23a02, zgc:103706; glutathione S-transferase pi 1; K00799 glutathione S-transferase [EC:2.5.1.18] (A)	23.402	63	18	128	9	0.837	0.845	0.817	1.174	1.146	1.225	1.419	9.5265e-05	mitochondria	GO:0000302 response to reactive oxygen species; GO:0001101 response to acid chemical; GO:0001676 long-chain fatty acid metabolic process; GO:0001775 cell activation; GO:0001817 regulation of cytokine production; GO:0001818 negative regulation of cytokine production; GO:0001932 regulation of protein phosphorylation; GO:0001933 negative regulation of protein phosphorylation; GO:0001959 regulation o…	GO:0005576 extracellular region; GO:0005622 intracellular; GO:0005623 cell; GO:0005634 nucleus; GO:0005737 cytoplasm; GO:0005739 mitochondrion; GO:0005829 cytosol; GO:0005886 plasma membrane; GO:0012505 endomembrane system; GO:0016020 membrane; GO:0030141 secretory granule; GO:0031410 cytoplasmic vesicle; GO:0031974 membrane-enclosed lumen; GO:0031982 vesicle; GO:0031983 vesicle lumen; GO:0032991…	GO:0003824 catalytic activity; GO:0004364 glutathione transferase activity; GO:0004601 peroxidase activity; GO:0004602 glutathione peroxidase activity; GO:0005488 binding; GO:0005515 protein binding; GO:0008144 drug binding; GO:0008432 JUN kinase binding; GO:0016209 antioxidant activity; GO:0016491 oxidoreductase activity; GO:0016684 oxidoreductase activity, acting on peroxide as acceptor; GO:001…	K00799	GST, gst; glutathione S-transferase [EC:2.5.1.18]	dre00480 Glutathione metabolism - Danio rerio (zebrafish); dre00980 Metabolism of xenobiotics by cytochrome P450 - Danio rerio (zebrafish); dre00982 Drug metabolism - cytochrome P450 - Danio rerio (zebrafish); dre00983 Drug metabolism - other enzymes - Danio rerio (zebrafish); dre01100 Metabolic pathways - Danio rerio (zebrafish);	PF02798	Glutathione S-transferase, N-terminal domain	O	KOG1695	Glutathione S-transferase
F02_transcript_21570	ada, zgc:92028; adenosine deaminase (EC:3.5.4.4); K01488 adenosine deaminase [EC:3.5.4.4] (A)	43.073	12.9	6	8	3	0.843	0.832	0.827	1.067	1.184	1.292	1.416	0.025018	cytoplasm	GO:0001775 cell activation; GO:0002376 immune system process; GO:0006139 nucleobase-containing compound metabolic process; GO:0006144 purine nucleobase metabolic process; GO:0006152 purine nucleoside catabolic process; GO:0006154 adenosine catabolic process; GO:0006725 cellular aromatic compound metabolic process; GO:0006807 nitrogen compound metabolic process; GO:0008152 metabolic process; GO:00…	GO:0005622 intracellular; GO:0005623 cell; GO:0005737 cytoplasm; GO:0005829 cytosol; GO:0005886 plasma membrane; GO:0009897 external side of plasma membrane; GO:0009986 cell surface; GO:0016020 membrane; GO:0044424 intracellular part; GO:0044425 membrane part; GO:0044444 cytoplasmic part; GO:0044459 plasma membrane part; GO:0044464 cell part; GO:0071944 cell periphery; GO:0098552 side of membrane;	GO:0003824 catalytic activity; GO:0004000 adenosine deaminase activity; GO:0005488 binding; GO:0008270 zinc ion binding; GO:0016787 hydrolase activity; GO:0016810 hydrolase activity, acting on carbon-nitrogen (but not peptide) bonds; GO:0016814 hydrolase activity, acting on carbon-nitrogen (but not peptide) bonds, in cyclic amidines; GO:0019239 deaminase activity; GO:0043167 ion binding; GO:00431…	K01488	add, ADA; adenosine deaminase [EC:3.5.4.4]	dre00230 Purine metabolism - Danio rerio (zebrafish); dre01100 Metabolic pathways - Danio rerio (zebrafish);	PF00962	Adenosine/AMP deaminase	F	KOG1097	Adenine deaminase/adenosine deaminase
F02_transcript_28526	MGC52578; HMG-X protein; K11295 high mobility group protein B2 (A)	24.147	19.7	4	5	4	0.688	0.794	0.976	1.194	1.127	1.152	1.413	0.025859	nucleus	GO:0000003 reproduction; GO:0000737 DNA catabolic process, endonucleolytic; GO:0001817 regulation of cytokine production; GO:0001819 positive regulation of cytokine production; GO:0001936 regulation of endothelial cell proliferation; GO:0001938 positive regulation of endothelial cell proliferation; GO:0002200 somatic diversification of immune receptors; GO:0002237 response to molecule of bacteria…	GO:0000228 nuclear chromosome; GO:0000785 chromatin; GO:0000790 nuclear chromatin; GO:0000793 condensed chromosome; GO:0005576 extracellular region; GO:0005615 extracellular space; GO:0005622 intracellular; GO:0005623 cell; GO:0005634 nucleus; GO:0005654 nucleoplasm; GO:0005694 chromosome; GO:0005730 nucleolus; GO:0005737 cytoplasm; GO:0031974 membrane-enclosed lumen; GO:0031981 nuclear lumen; GO…	GO:0000217 DNA secondary structure binding; GO:0000400 four-way junction DNA binding; GO:0000976 transcription regulatory region sequence-specific DNA binding; GO:0001067 regulatory region nucleic acid binding; GO:0001158 enhancer sequence-specific DNA binding; GO:0003676 nucleic acid binding; GO:0003677 DNA binding; GO:0003682 chromatin binding; GO:0003684 damaged DNA binding; GO:0003690 double-…	K11295	HMGB2; high mobility group protein B2		PF09011; PF00505	Domain of unknown function (DUF1898); HMG (high mobility group) box	K	KOG0381	HMG box-containing protein
F02_transcript_20420	oxct1a, oxct1, wu:fj36f06, wu:fj48g08, zgc:92003; 3-oxoacid CoA transferase 1a (EC:2.8.3.5); K01027 3-oxoacid CoA-transferase [EC:2.8.3.5] (A)	38.412	5.7	2	2	2	0.882	0.697	0.922	1.532	1.014	0.982	1.411	0.120064	mitochondria	GO:0002791 regulation of peptide secretion; GO:0002793 positive regulation of peptide secretion; GO:0006091 generation of precursor metabolites and energy; GO:0006950 response to stress; GO:0007275 multicellular organism development; GO:0007399 nervous system development; GO:0007417 central nervous system development; GO:0007420 brain development; GO:0007507 heart development; GO:0007584 response…	GO:0005622 intracellular; GO:0005623 cell; GO:0005634 nucleus; GO:0005654 nucleoplasm; GO:0005737 cytoplasm; GO:0005739 mitochondrion; GO:0005759 mitochondrial matrix; GO:0031974 membrane-enclosed lumen; GO:0031981 nuclear lumen; GO:0043226 organelle; GO:0043227 membrane-bounded organelle; GO:0043229 intracellular organelle; GO:0043231 intracellular membrane-bounded organelle; GO:0043233 organell…	GO:0003824 catalytic activity; GO:0005488 binding; GO:0005515 protein binding; GO:0008260 3-oxoacid CoA-transferase activity; GO:0008410 CoA-transferase activity; GO:0016740 transferase activity; GO:0016782 transferase activity, transferring sulfur-containing groups; GO:0042802 identical protein binding; GO:0042803 protein homodimerization activity; GO:0046983 protein dimerization activity;	K01027	OXCT; 3-oxoacid CoA-transferase [EC:2.8.3.5]	dre00072 Synthesis and degradation of ketone bodies - Danio rerio (zebrafish); dre00280 Valine, leucine and isoleucine degradation - Danio rerio (zebrafish); dre00650 Butanoate metabolism - Danio rerio (zebrafish); dre01100 Metabolic pathways - Danio rerio (zebrafish);	PF01144	Coenzyme A transferase	C	KOG3822	Succinyl-CoA:alpha-ketoacid-CoA transferase
F02_transcript_28394	gstp1, cb356, wu:fa02f07, wu:fj23a02, zgc:103706; glutathione S-transferase pi 1; K00799 glutathione S-transferase [EC:2.5.1.18] (A)	13.228	50.4	11	59	2	0.744	0.859	0.885	1.147	1.37	0.994	1.411	0.03418	cytoplasm	GO:0000302 response to reactive oxygen species; GO:0001101 response to acid chemical; GO:0001676 long-chain fatty acid metabolic process; GO:0001775 cell activation; GO:0001817 regulation of cytokine production; GO:0001818 negative regulation of cytokine production; GO:0001932 regulation of protein phosphorylation; GO:0001933 negative regulation of protein phosphorylation; GO:0001959 regulation o…	GO:0005576 extracellular region; GO:0005622 intracellular; GO:0005623 cell; GO:0005634 nucleus; GO:0005737 cytoplasm; GO:0005739 mitochondrion; GO:0005829 cytosol; GO:0005886 plasma membrane; GO:0012505 endomembrane system; GO:0016020 membrane; GO:0030141 secretory granule; GO:0031410 cytoplasmic vesicle; GO:0031974 membrane-enclosed lumen; GO:0031982 vesicle; GO:0031983 vesicle lumen; GO:0032991…	GO:0003824 catalytic activity; GO:0004364 glutathione transferase activity; GO:0004601 peroxidase activity; GO:0004602 glutathione peroxidase activity; GO:0005488 binding; GO:0005515 protein binding; GO:0008144 drug binding; GO:0008432 JUN kinase binding; GO:0016209 antioxidant activity; GO:0016491 oxidoreductase activity; GO:0016684 oxidoreductase activity, acting on peroxide as acceptor; GO:001…	K00799	GST, gst; glutathione S-transferase [EC:2.5.1.18]	dre00480 Glutathione metabolism - Danio rerio (zebrafish); dre00980 Metabolism of xenobiotics by cytochrome P450 - Danio rerio (zebrafish); dre00982 Drug metabolism - cytochrome P450 - Danio rerio (zebrafish); dre00983 Drug metabolism - other enzymes - Danio rerio (zebrafish); dre01100 Metabolic pathways - Danio rerio (zebrafish);			O	KOG1695	Glutathione S-transferase
F02_transcript_3905	Uncharacterized protein	60.216	54.2	31	64	1	0.894	0.805	0.818	1.131	1.212	1.185	1.402	0.0009202	cytoplasm	GO:0000902 cell morphogenesis; GO:0000904 cell morphogenesis involved in differentiation; GO:0002064 epithelial cell development; GO:0003382 epithelial cell morphogenesis; GO:0006996 organelle organization; GO:0007010 cytoskeleton organization; GO:0007015 actin filament organization; GO:0007043 cell-cell junction assembly; GO:0009653 anatomical structure morphogenesis; GO:0009888 tissue developme…	GO:0005622 intracellular; GO:0005623 cell; GO:0005856 cytoskeleton; GO:0005884 actin filament; GO:0005911 cell-cell junction; GO:0005912 adherens junction; GO:0005923 bicellular tight junction; GO:0015629 actin cytoskeleton; GO:0030054 cell junction; GO:0030057 desmosome; GO:0043226 organelle; GO:0043228 non-membrane-bounded organelle; GO:0043229 intracellular organelle; GO:0043232 intracellular …	GO:0003779 actin binding; GO:0005488 binding; GO:0005515 protein binding; GO:0008092 cytoskeletal protein binding; GO:0044877 macromolecular complex binding; GO:0051015 actin filament binding;
F02_transcript_13429	Uncharacterized protein	64.413	32.7	15	20	13	0.837	0.868	0.785	1.133	1.225	1.132	1.402	0.00101574	cytoplasm
F02_transcript_25564	zgc:101744; K17279 receptor expression-enhancing protein 5/6 (A)	21.129	3.8	1	2	1	0.774	0.956	0.781	1.438	1.055	1.023	1.4	0.062797	cytoplasm	GO:0001654 eye development; GO:0003008 system process; GO:0003407 neural retina development; GO:0007275 multicellular organism development; GO:0007423 sensory organ development; GO:0007600 sensory perception; GO:0007601 visual perception; GO:0009314 response to radiation; GO:0009416 response to light stimulus; GO:0009581 detection of external stimulus; GO:0009582 detection of abiotic stimulus; GO…	GO:0001917 photoreceptor inner segment; GO:0005622 intracellular; GO:0005623 cell; GO:0005737 cytoplasm; GO:0005783 endoplasmic reticulum; GO:0005789 endoplasmic reticulum membrane; GO:0012505 endomembrane system; GO:0016020 membrane; GO:0031984 organelle subcompartment; GO:0042175 nuclear outer membrane-endoplasmic reticulum membrane network; GO:0042995 cell projection; GO:0043005 neuron project…		K17279	REEP5_6; receptor expression-enhancing protein 5/6				U	KOG1725	Protein involved in membrane traffic (YOP1/TB2/DP1/HVA22 family)
F02_transcript_8464	Anoctamin-10 [Stylophora pistillata]	75.206	23	13	21	1	1.005	0.865	0.654	1.194	1.088	1.238	1.395	0.058	plasma membrane	GO:0006810 transport; GO:0006811 ion transport; GO:0006812 cation transport; GO:0006820 anion transport; GO:0006821 chloride transport; GO:0015698 inorganic anion transport; GO:0034220 ion transmembrane transport; GO:0051179 localization; GO:0051234 establishment of localization; GO:0055085 transmembrane transport; GO:0098655 cation transmembrane transport; GO:0098656 anion transmembrane transpor…	GO:0005622 intracellular; GO:0005623 cell; GO:0005886 plasma membrane; GO:0016020 membrane; GO:0044464 cell part; GO:0071944 cell periphery;	GO:0005215 transporter activity; GO:0005216 ion channel activity; GO:0005227 calcium activated cation channel activity; GO:0005229 intracellular calcium activated chloride channel activity; GO:0005253 anion channel activity; GO:0005254 chloride channel activity; GO:0005261 cation channel activity; GO:0008324 cation transmembrane transporter activity; GO:0008509 anion transmembrane transporter act…	K19327	ANO10, TMEM16K; anoctamin-10				D	KOG2513	Protein required for meiotic chromosome segregation
F02_transcript_3659	E3 ubiquitin-protein ligase ARIH2-like; K11969 ariadne-2 (A)	58.61	3.4	1	1	1	1.008	0.66	0.856	1.224	1.092	1.201	1.393	0.054475	nucleus	GO:0000209 protein polyubiquitination; GO:0002376 immune system process; GO:0002520 immune system development; GO:0006464 cellular protein modification process; GO:0006508 proteolysis; GO:0006511 ubiquitin-dependent protein catabolic process; GO:0006807 nitrogen compound metabolic process; GO:0007275 multicellular organism development; GO:0008152 metabolic process; GO:0008283 cell proliferation; …	GO:0000151 ubiquitin ligase complex; GO:0005622 intracellular; GO:0005623 cell; GO:0005634 nucleus; GO:0005654 nucleoplasm; GO:0005737 cytoplasm; GO:0031974 membrane-enclosed lumen; GO:0031981 nuclear lumen; GO:0032991 macromolecular complex; GO:0043226 organelle; GO:0043227 membrane-bounded organelle; GO:0043229 intracellular organelle; GO:0043231 intracellular membrane-bounded organelle; GO:004…	GO:0003824 catalytic activity; GO:0004842 ubiquitin-protein transferase activity; GO:0005488 binding; GO:0005515 protein binding; GO:0008270 zinc ion binding; GO:0016740 transferase activity; GO:0019787 ubiquitin-like protein transferase activity; GO:0019899 enzyme binding; GO:0031624 ubiquitin conjugating enzyme binding; GO:0043167 ion binding; GO:0043169 cation binding; GO:0044390 ubiquitin-lik…	K11969	ARIH2; ariadne-2 [EC:2.3.2.27]		PF01485	IBR domain	O	KOG1812	Predicted E3 ubiquitin ligase
F02_transcript_19582	Neudesin [Stylophora pistillata]	17.999	29.6	5	7	3	0.787	0.869	0.866	1.252	1.247	1.015	1.393	0.012779	extracellular	GO:0001932 regulation of protein phosphorylation; GO:0001934 positive regulation of protein phosphorylation; GO:0009605 response to external stimulus; GO:0009893 positive regulation of metabolic process; GO:0009966 regulation of signal transduction; GO:0009967 positive regulation of signal transduction; GO:0009991 response to extracellular stimulus; GO:0010469 regulation of receptor activity; GO:…	GO:0005576 extracellular region; GO:0005615 extracellular space; GO:0005622 intracellular; GO:0005623 cell; GO:0005634 nucleus; GO:0005654 nucleoplasm; GO:0012505 endomembrane system; GO:0016020 membrane; GO:0031974 membrane-enclosed lumen; GO:0031981 nuclear lumen; GO:0043226 organelle; GO:0043227 membrane-bounded organelle; GO:0043229 intracellular organelle; GO:0043231 intracellular membrane-b…	GO:0005102 receptor binding; GO:0005488 binding; GO:0005515 protein binding; GO:0008083 growth factor activity; GO:0030545 receptor regulator activity; GO:0048018 receptor agonist activity; GO:0098772 molecular function regulator;				PF00173	Cytochrome b5-like Heme/Steroid binding domain	S	KOG1110	Putative steroid membrane receptor Hpr6.6/25-Dx
F02_transcript_29922	alpha-N-acetylgalactosamine-specific lectin-like isoform X1 [Stylophora pistillata]	18.72	31.7	6	251	1	0.839	1.03	0.636	1.096	1.257	1.123	1.388	0.077322	extracellular				K06560	MRC, CD206, CD280; mannose receptor, C type	dre04145 Phagosome - Danio rerio (zebrafish);	PF00059	Lectin C-type domain	TV	KOG4297	C-type lectin
F02_transcript_14973	Uncharacterized protein	19.745	41.1	6	16	6	0.835	0.823	0.848	1.098	1.179	1.172	1.376	0.000198541	cytoplasm	GO:0000041 transition metal ion transport; GO:0001881 receptor recycling; GO:0006810 transport; GO:0006811 ion transport; GO:0006812 cation transport; GO:0006826 iron ion transport; GO:0008104 protein localization; GO:0008152 metabolic process; GO:0009987 cellular process; GO:0015031 protein transport; GO:0015682 ferric iron transport; GO:0015833 peptide transport; GO:0023051 regulation of signal…	GO:0005622 intracellular; GO:0005623 cell; GO:0005737 cytoplasm; GO:0005768 endosome; GO:0010008 endosome membrane; GO:0012505 endomembrane system; GO:0016020 membrane; GO:0031090 organelle membrane; GO:0031410 cytoplasmic vesicle; GO:0031982 vesicle; GO:0043226 organelle; GO:0043227 membrane-bounded organelle; GO:0043229 intracellular organelle; GO:0044422 organelle part; GO:0044424 intracellula…		K20243	REP15; Rab15 effector protein
F02_transcript_4538	glsb, gls, si:dz87i4.2, wu:fa97e05; glutaminase b; K01425 glutaminase [EC:3.5.1.2] (A)	65.277	4.2	2	2	1	0.349	1.336	0.86	0.656	1.576	1.271	1.376	0.45172	nucleus	GO:0001967 suckling behavior; GO:0002087 regulation of respiratory gaseous exchange by neurological system process; GO:0003008 system process; GO:0006082 organic acid metabolic process; GO:0006520 cellular amino acid metabolic process; GO:0006536 glutamate metabolic process; GO:0006537 glutamate biosynthetic process; GO:0006541 glutamine metabolic process; GO:0006543 glutamine catabolic process; …	GO:0005622 intracellular; GO:0005623 cell; GO:0005737 cytoplasm; GO:0005739 mitochondrion; GO:0005759 mitochondrial matrix; GO:0005829 cytosol; GO:0031974 membrane-enclosed lumen; GO:0043226 organelle; GO:0043227 membrane-bounded organelle; GO:0043229 intracellular organelle; GO:0043231 intracellular membrane-bounded organelle; GO:0043233 organelle lumen; GO:0044422 organelle part; GO:0044424 int…	GO:0003824 catalytic activity; GO:0004359 glutaminase activity; GO:0005488 binding; GO:0005515 protein binding; GO:0016787 hydrolase activity; GO:0016810 hydrolase activity, acting on carbon-nitrogen (but not peptide) bonds; GO:0016811 hydrolase activity, acting on carbon-nitrogen (but not peptide) bonds, in linear amides; GO:0042802 identical protein binding;	K01425	glsA, GLS; glutaminase [EC:3.5.1.2]	dre00220 Arginine biosynthesis - Danio rerio (zebrafish); dre00250 Alanine, aspartate and glutamate metabolism - Danio rerio (zebrafish); dre00471 D-Glutamine and D-glutamate metabolism - Danio rerio (zebrafish); dre01100 Metabolic pathways - Danio rerio (zebrafish);	PF04960	Glutaminase	E	KOG0506	Glutaminase (contains ankyrin repeat)
F02_transcript_22479	ferritin heavy chain [Mus musculus]	22.233	16.3	3	5	3	0.959	0.788	0.774	1.002	1.242	1.206	1.369	0.030801	mitochondria							PF00210	Ferritin-like domain	P	KOG2332	Ferritin
F02_transcript_29367	Uncharacterized protein	12.385	9.3	1	1	1	0.72	0.885	0.946	1.173	1.247	1.065	1.366	0.028255	mitochondria	GO:0001708 cell fate specification; GO:0007275 multicellular organism development; GO:0008283 cell proliferation; GO:0009987 cellular process; GO:0030154 cell differentiation; GO:0031016 pancreas development; GO:0031017 exocrine pancreas development; GO:0032501 multicellular organismal process; GO:0032502 developmental process; GO:0035272 exocrine system development; GO:0045165 cell fate commitme…
F02_transcript_21823	Uncharacterized protein	42.909	15	5	10	2	0.748	0.867	0.925	1.227	1.152	1.087	1.365	0.0120778	mitochondria
F02_transcript_17478	Uncharacterized protein	13.236	10.6	1	1	1	0.908	0.816	0.826	1.429	0.822	1.224	1.363	0.165642	plasma membrane				K05764	TMSB4; thymosin, beta 4	dre04810 Regulation of actin cytoskeleton - Danio rerio (zebrafish);
F02_transcript_29813	Fibroleukin [Stylophora pistillata]	19.338	42.7	5	69	5	0.817	0.946	0.793	1.275	1.064	1.121	1.354	0.0167351	extracellular				K06560	MRC, CD206, CD280; mannose receptor, C type	dre04145 Phagosome - Danio rerio (zebrafish);	PF00059	Lectin C-type domain	TV	KOG4297	C-type lectin
F02_transcript_23617	setb, wu:fb30g11, wu:fd16c08; SET translocation (myeloid leukemia-associated) B; K11290 template-activating factor I (A)	31.843	12.3	3	7	3	0.716	0.85	0.958	1.146	1.116	1.147	1.351	0.068578	cytoplasm				K11290	SET, TAF1, I2PP2A; template-activating factor I				L	KOG1508	DNA replication factor/protein phosphatase inhibitor SET/SPR-2
F02_transcript_22467	gnpda2, si:dkey-185e18.2; glucosamine-6-phosphate deaminase 2; K02564 glucosamine-6-phosphate deaminase [EC:3.5.99.6] (A)	31.363	28.5	8	11	4	0.849	0.802	0.885	1.224	1.067	1.132	1.35	0.0036231	cytoplasm	GO:0006040 amino sugar metabolic process; GO:0006041 glucosamine metabolic process; GO:0006043 glucosamine catabolic process; GO:0006044 N-acetylglucosamine metabolic process; GO:0006091 generation of precursor metabolites and energy; GO:0008152 metabolic process; GO:0009056 catabolic process; GO:0009987 cellular process; GO:0044237 cellular metabolic process; GO:0046348 amino sugar catabolic pro…	GO:0005622 intracellular; GO:0005623 cell; GO:0005737 cytoplasm; GO:0005829 cytosol; GO:0044424 intracellular part; GO:0044444 cytoplasmic part; GO:0044464 cell part;	GO:0003824 catalytic activity; GO:0004342 glucosamine-6-phosphate deaminase activity; GO:0016787 hydrolase activity; GO:0016853 isomerase activity; GO:0016860 intramolecular oxidoreductase activity; GO:0016861 intramolecular oxidoreductase activity, interconverting aldoses and ketoses; GO:0019239 deaminase activity;	K02564	nagB, GNPDA; glucosamine-6-phosphate deaminase [EC:3.5.99.6]	dre00520 Amino sugar and nucleotide sugar metabolism - Danio rerio (zebrafish); dre01100 Metabolic pathways - Danio rerio (zebrafish);	PF01182	Glucosamine-6-phosphate isomerases/6-phosphogluconolactonase	G	KOG3148	Glucosamine-6-phosphate isomerase
F02_transcript_29627	cystatin-like; K13899 cystatin-C (A)	14.811	19	3	6	3	0.793	0.86	0.935	1.123	1.22	1.145	1.348	0.0050411	extracellular				K13899	CST3; cystatin-C		PF00031	Cystatin domain
F02_transcript_8857	tktb, cb860, fb38f03, fj52f12, id:ibd3270, tkt, wu:cegs2794, wu:fb38f03, wu:fj52f12; transketolase b (EC:2.2.1.1); K00615 transketolase [EC:2.2.1.1] (A)	67.69	45	24	57	1	0.951	0.835	0.788	1.25	1.19	1.026	1.347	0.021681	cytoplasm	GO:0006355 regulation of transcription, DNA-templated; GO:0009889 regulation of biosynthetic process; GO:0010468 regulation of gene expression; GO:0010556 regulation of macromolecule biosynthetic process; GO:0019219 regulation of nucleobase-containing compound metabolic process; GO:0019222 regulation of metabolic process; GO:0031323 regulation of cellular metabolic process; GO:0031326 regulation …	GO:0005622 intracellular; GO:0005623 cell; GO:0005737 cytoplasm; GO:0044424 intracellular part; GO:0044464 cell part;		K00615	E2.2.1.1, tktA, tktB; transketolase [EC:2.2.1.1]	dre00030 Pentose phosphate pathway - Danio rerio (zebrafish); dre01100 Metabolic pathways - Danio rerio (zebrafish); dre01200 Carbon metabolism - Danio rerio (zebrafish); dre01230 Biosynthesis of amino acids - Danio rerio (zebrafish);	PF00456; PF02779; PF02780	Transketolase, thiamine diphosphate binding domain; Transketolase, pyrimidine binding domain; Transketolase, C-terminal domain	G	KOG0523	Transketolase
F02_transcript_28805	blvrb, cb1064, wu:fb73f01, zgc:91854; biliverdin reductase B (EC:1.3.1.24); K05901 biliverdin reductase / flavin reductase [EC:1.3.1.24 1.5.1.30] (A)	15.791	47.9	6	11	6	0.865	0.885	0.819	1.192	1.087	1.175	1.344	0.00129606	cytoplasm	GO:0000003 reproduction; GO:0006725 cellular aromatic compound metabolic process; GO:0006778 porphyrin-containing compound metabolic process; GO:0006787 porphyrin-containing compound catabolic process; GO:0006807 nitrogen compound metabolic process; GO:0008152 metabolic process; GO:0009056 catabolic process; GO:0009987 cellular process; GO:0019439 aromatic compound catabolic process; GO:0032501 m…	GO:0005622 intracellular; GO:0005623 cell; GO:0005634 nucleus; GO:0005654 nucleoplasm; GO:0005737 cytoplasm; GO:0005829 cytosol; GO:0005886 plasma membrane; GO:0016020 membrane; GO:0030424 axon; GO:0031974 membrane-enclosed lumen; GO:0031981 nuclear lumen; GO:0033267 axon part; GO:0042995 cell projection; GO:0043005 neuron projection; GO:0043195 terminal bouton; GO:0043226 organelle; GO:0043227 m…	GO:0003824 catalytic activity; GO:0004074 biliverdin reductase activity; GO:0016491 oxidoreductase activity; GO:0016627 oxidoreductase activity, acting on the CH-CH group of donors; GO:0016628 oxidoreductase activity, acting on the CH-CH group of donors, NAD or NADP as acceptor; GO:0016645 oxidoreductase activity, acting on the CH-NH group of donors; GO:0016646 oxidoreductase activity, acting on …	K05901	BLVRB; biliverdin reductase / flavin reductase [EC:1.3.1.24 1.5.1.30]	dre00740 Riboflavin metabolism - Danio rerio (zebrafish); dre00860 Porphyrin and chlorophyll metabolism - Danio rerio (zebrafish); dre01100 Metabolic pathways - Danio rerio (zebrafish);	PF13460	NADH(P)-binding
F02_transcript_10370	MACRO domain-containing protein 2, partial [Stegodyphus mimosarum]	51.228	8.8	3	5	3	0.98	0.764	0.831	1.298	1.131	1.033	1.344	0.039678	nucleus	GO:0006139 nucleobase-containing compound metabolic process; GO:0006464 cellular protein modification process; GO:0006725 cellular aromatic compound metabolic process; GO:0006807 nitrogen compound metabolic process; GO:0006950 response to stress; GO:0006974 cellular response to DNA damage stimulus; GO:0007275 multicellular organism development; GO:0007399 nervous system development; GO:0007417 ce…	GO:0005622 intracellular; GO:0005623 cell; GO:0005634 nucleus; GO:0005730 nucleolus; GO:0005813 centrosome; GO:0005815 microtubule organizing center; GO:0005856 cytoskeleton; GO:0015630 microtubule cytoskeleton; GO:0031974 membrane-enclosed lumen; GO:0031981 nuclear lumen; GO:0043226 organelle; GO:0043227 membrane-bounded organelle; GO:0043228 non-membrane-bounded organelle; GO:0043229 intracellu…	GO:0003824 catalytic activity; GO:0016787 hydrolase activity; GO:0016798 hydrolase activity, acting on glycosyl bonds; GO:0019213 deacetylase activity;	K23518			PF01661	Macro domain	BK	KOG2633	Hismacro and SEC14 domain-containing proteins
F02_transcript_23931	gmds, dZ84G17.1, si:ch211-231n5.3, srn, twd, zgc:63772; GDP-mannose 4,6-dehydratase (EC:4.2.1.47); K01711 GDPmannose 4,6-dehydratase [EC:4.2.1.47] (A)	39.757	30.1	10	12	1	0.805	0.854	0.918	1.117	1.175	1.168	1.343	0.00199655	mitochondria	GO:0000003 reproduction; GO:0003006 developmental process involved in reproduction; GO:0006139 nucleobase-containing compound metabolic process; GO:0006725 cellular aromatic compound metabolic process; GO:0006793 phosphorus metabolic process; GO:0006807 nitrogen compound metabolic process; GO:0007154 cell communication; GO:0007165 signal transduction; GO:0007166 cell surface receptor signaling pa…	GO:0005622 intracellular; GO:0005623 cell; GO:0005737 cytoplasm; GO:0005829 cytosol; GO:0044424 intracellular part; GO:0044444 cytoplasmic part; GO:0044464 cell part;	GO:0000166 nucleotide binding; GO:0003824 catalytic activity; GO:0005488 binding; GO:0005515 protein binding; GO:0008446 GDP-mannose 4,6-dehydratase activity; GO:0016829 lyase activity; GO:0016835 carbon-oxygen lyase activity; GO:0016836 hydro-lyase activity; GO:0036094 small molecule binding; GO:0042802 identical protein binding; GO:0043167 ion binding; GO:0043168 anion binding; GO:0048037 cofac…	K01711	gmd, GMDS; GDPmannose 4,6-dehydratase [EC:4.2.1.47]	dre00051 Fructose and mannose metabolism - Danio rerio (zebrafish); dre00520 Amino sugar and nucleotide sugar metabolism - Danio rerio (zebrafish); dre01100 Metabolic pathways - Danio rerio (zebrafish);			G	KOG1372	GDP-mannose 4,6 dehydratase
F02_transcript_4946	AP-5 complex subunit beta-1-like [Stylophora pistillata]	45.991	2.2	1	2	1	0.943	0.917	0.721	1.098	1.158	1.207	1.342	0.028437	cytoplasm,mitochondria	GO:0006810 transport; GO:0016192 vesicle-mediated transport; GO:0016197 endosomal transport; GO:0046907 intracellular transport; GO:0051179 localization; GO:0051234 establishment of localization; GO:0051641 cellular localization; GO:0051649 establishment of localization in cell;	GO:0005622 intracellular; GO:0005623 cell; GO:0005737 cytoplasm; GO:0016020 membrane; GO:0030117 membrane coat; GO:0030119 AP-type membrane coat adaptor complex; GO:0032991 macromolecular complex; GO:0044424 intracellular part; GO:0044425 membrane part; GO:0044444 cytoplasmic part; GO:0044464 cell part; GO:0048475 coated membrane; GO:0098796 membrane protein complex;		K19022	AP5B1; AP-5 complex subunit beta-1
F02_transcript_21186	galectin-3-binding protein A-like; K17300 galectin-3-binding protein (A)	43.219	11.6	3	3	3	0.761	0.587	1.228	1.355	0.751	1.336	1.336	0.35682	nucleus	GO:0002576 platelet degranulation; GO:0006810 transport; GO:0006887 exocytosis; GO:0006897 endocytosis; GO:0006898 receptor-mediated endocytosis; GO:0006950 response to stress; GO:0006952 defense response; GO:0006968 cellular defense response; GO:0007154 cell communication; GO:0007165 signal transduction; GO:0009987 cellular process; GO:0016192 vesicle-mediated transport; GO:0023052 signaling; GO…	GO:0005576 extracellular region; GO:0005615 extracellular space; GO:0005622 intracellular; GO:0005623 cell; GO:0005737 cytoplasm; GO:0012505 endomembrane system; GO:0030141 secretory granule; GO:0031089 platelet dense granule lumen; GO:0031410 cytoplasmic vesicle; GO:0031974 membrane-enclosed lumen; GO:0031982 vesicle; GO:0031983 vesicle lumen; GO:0034774 secretory granule lumen; GO:0042827 plate…	GO:0005044 scavenger receptor activity; GO:0038024 cargo receptor activity;	K17300	LGALS3BP; galectin-3-binding protein		PF07707	BTB And C-terminal Kelch
F02_transcript_3621	Uncharacterized protein	59.552	33.5	12	19	4	0.839	0.892	0.904	1.092	1.2	1.223	1.334	0.0023609	cytoplasm				K22909
F02_transcript_17922	Doublesex- and mab-3-related transcription factor A2, partial [Zootermopsis nevadensis]	35.99	3.3	1	1	1	0.809	0.891	0.885	1.26	1.103	1.082	1.333	0.0074617	mitochondria	GO:0000003 reproduction; GO:0001541 ovarian follicle development; GO:0003006 developmental process involved in reproduction; GO:0006355 regulation of transcription, DNA-templated; GO:0006357 regulation of transcription from RNA polymerase II promoter; GO:0007275 multicellular organism development; GO:0007548 sex differentiation; GO:0007610 behavior; GO:0007617 mating behavior; GO:0007618 mating; …		GO:0000981 RNA polymerase II transcription factor activity, sequence-specific DNA binding; GO:0003676 nucleic acid binding; GO:0003677 DNA binding; GO:0003700 transcription factor activity, sequence-specific DNA binding; GO:0005488 binding; GO:0005515 protein binding; GO:0042802 identical protein binding; GO:0042803 protein homodimerization activity; GO:0043565 sequence-specific DNA binding; GO:0…	K19491	DMRT4_5, DMRTA; doublesex- and mab-3-related transcription factor 4/5		PF03474	DMRTA motif	K	KOG3815	Transcription factor Doublesex
F02_transcript_21647	gss, sb:cb814, zgc:101574; glutathione synthetase (EC:6.3.2.3); K01920 glutathione synthase [EC:6.3.2.3] (A)	52.758	2.3	1	2	1	0.89	0.932	0.768	1.077	1.236	1.14	1.333	0.0149635	cytoplasm	GO:0001101 response to acid chemical; GO:0006082 organic acid metabolic process; GO:0006518 peptide metabolic process; GO:0006520 cellular amino acid metabolic process; GO:0006575 cellular modified amino acid metabolic process; GO:0006749 glutathione metabolic process; GO:0006750 glutathione biosynthetic process; GO:0006790 sulfur compound metabolic process; GO:0006807 nitrogen compound metabolic…	GO:0005622 intracellular; GO:0005623 cell; GO:0005737 cytoplasm; GO:0005829 cytosol; GO:0044424 intracellular part; GO:0044444 cytoplasmic part; GO:0044464 cell part;	GO:0000166 nucleotide binding; GO:0000287 magnesium ion binding; GO:0003824 catalytic activity; GO:0004363 glutathione synthase activity; GO:0005488 binding; GO:0005515 protein binding; GO:0005524 ATP binding; GO:0008144 drug binding; GO:0016594 glycine binding; GO:0016597 amino acid binding; GO:0016874 ligase activity; GO:0016879 ligase activity, forming carbon-nitrogen bonds; GO:0016881 acid-am…	K21456	GSS; glutathione synthase [EC:6.3.2.3]	dre00270 Cysteine and methionine metabolism - Danio rerio (zebrafish); dre00480 Glutathione metabolism - Danio rerio (zebrafish); dre01100 Metabolic pathways - Danio rerio (zebrafish); dre04216 Ferroptosis - Danio rerio (zebrafish);	PF03917; PF03199	Eukaryotic glutathione synthase, ATP binding domain; Eukaryotic glutathione synthase	Q	KOG0021	Glutathione synthetase
F02_transcript_10743	CASP6; caspase 6, apoptosis-related cysteine peptidase; K04396 caspase 6 [EC:3.4.22.59] (A)	28.676	20.6	4	11	1	0.868	0.767	0.954	1.072	1.147	1.231	1.333	0.0179394	cytoplasm	GO:0000302 response to reactive oxygen species; GO:0001654 eye development; GO:0002088 lens development in camera-type eye; GO:0002525 acute inflammatory response to non-antigenic stimulus; GO:0002526 acute inflammatory response; GO:0006508 proteolysis; GO:0006807 nitrogen compound metabolic process; GO:0006915 apoptotic process; GO:0006950 response to stress; GO:0006952 defense response; GO:0006…	GO:0005622 intracellular; GO:0005623 cell; GO:0005634 nucleus; GO:0005654 nucleoplasm; GO:0005737 cytoplasm; GO:0005829 cytosol; GO:0031974 membrane-enclosed lumen; GO:0031981 nuclear lumen; GO:0043226 organelle; GO:0043227 membrane-bounded organelle; GO:0043229 intracellular organelle; GO:0043231 intracellular membrane-bounded organelle; GO:0043233 organelle lumen; GO:0044422 organelle part; GO:…	GO:0003824 catalytic activity; GO:0004175 endopeptidase activity; GO:0004197 cysteine-type endopeptidase activity; GO:0005488 binding; GO:0005515 protein binding; GO:0008233 peptidase activity; GO:0008234 cysteine-type peptidase activity; GO:0016787 hydrolase activity; GO:0042802 identical protein binding; GO:0070011 peptidase activity, acting on L-amino acid peptides; GO:0097153 cysteine-type en…	K04396	CASP6; caspase 6 [EC:3.4.22.59]	dre04210 Apoptosis - Danio rerio (zebrafish);	PF00656	Caspase domain	D	KOG3573	Caspase, apoptotic cysteine protease
F02_transcript_992	alpha-2-macroglobulin-like protein 1-like; K03910 alpha-2-macroglobulin (A)	166.06	10.3	14	15	14	0.828	0.848	0.91	1.136	1.193	1.116	1.332	0.00115915	extracellular				K23593			PF01835; PF07703; PF07678; PF07677	MG2 domain; Alpha-2-macroglobulin family N-terminal region; A-macroglobulin complement component; A-macroglobulin receptor	O	KOG1366	Alpha-macroglobulin
F02_transcript_8496	p4hb, psmb3, zgc:92596; prolyl 4-hydroxylase, beta polypeptide (EC:5.3.4.1); K09580 protein disulfide-isomerase A1 [EC:5.3.4.1] (A)	56.417	21.6	11	14	1	0.822	0.809	0.96	1.094	1.149	1.204	1.33	0.009297	extracellular	GO:0001666 response to hypoxia; GO:0006082 organic acid metabolic process; GO:0006457 protein folding; GO:0006464 cellular protein modification process; GO:0006520 cellular amino acid metabolic process; GO:0006575 cellular modified amino acid metabolic process; GO:0006807 nitrogen compound metabolic process; GO:0006950 response to stress; GO:0007154 cell communication; GO:0007165 signal transduct…	GO:0005576 extracellular region; GO:0005622 intracellular; GO:0005623 cell; GO:0005737 cytoplasm; GO:0005783 endoplasmic reticulum; GO:0005788 endoplasmic reticulum lumen; GO:0005793 endoplasmic reticulum-Golgi intermediate compartment; GO:0005886 plasma membrane; GO:0009897 external side of plasma membrane; GO:0009986 cell surface; GO:0012505 endomembrane system; GO:0016020 membrane; GO:0016222 …	GO:0003756 protein disulfide isomerase activity; GO:0003810 protein-glutamine gamma-glutamyltransferase activity; GO:0003824 catalytic activity; GO:0004656 procollagen-proline 4-dioxygenase activity; GO:0005102 receptor binding; GO:0005178 integrin binding; GO:0005488 binding; GO:0005515 protein binding; GO:0015036 disulfide oxidoreductase activity; GO:0015037 peptide disulfide oxidoreductase act…	K09580	PDIA1, P4HB; protein disulfide-isomerase A1 [EC:5.3.4.1]	dre04141 Protein processing in endoplasmic reticulum - Danio rerio (zebrafish);	PF00085; PF13848	Thioredoxin; Thioredoxin-like domain	O	KOG0190	Protein disulfide isomerase (prolyl 4-hydroxylase beta subunit)
F02_transcript_1780	major vault protein-like; K17266 major vault protein (A)	39.576	38.7	13	44	1	0.762	0.976	0.853	1.151	1.2	1.093	1.329	0.0194568	cytoplasm	GO:0001654 eye development; GO:0001775 cell activation; GO:0001932 regulation of protein phosphorylation; GO:0001933 negative regulation of protein phosphorylation; GO:0002252 immune effector process; GO:0002263 cell activation involved in immune response; GO:0002274 myeloid leukocyte activation; GO:0002275 myeloid cell activation involved in immune response; GO:0002283 neutrophil activation invo…	GO:0005576 extracellular region; GO:0005622 intracellular; GO:0005623 cell; GO:0005634 nucleus; GO:0005737 cytoplasm; GO:0005829 cytosol; GO:0005856 cytoskeleton; GO:0012505 endomembrane system; GO:0030141 secretory granule; GO:0031410 cytoplasmic vesicle; GO:0031974 membrane-enclosed lumen; GO:0031982 vesicle; GO:0031983 vesicle lumen; GO:0034774 secretory granule lumen; GO:0043226 organelle; GO…	GO:0005488 binding; GO:0005515 protein binding; GO:0019899 enzyme binding; GO:0019900 kinase binding; GO:0019901 protein kinase binding; GO:0019902 phosphatase binding; GO:0019903 protein phosphatase binding; GO:0042802 identical protein binding;	K17266	MVP; major vault protein		PF11978	Shoulder domain
F02_transcript_21540	histidine ammonia-lyase-like; K01745 histidine ammonia-lyase [EC:4.3.1.3] (A)	57.766	35.8	16	32	16	0.925	0.808	0.831	1.098	1.124	1.185	1.329	0.0037021	cytoskeleton	GO:0006082 organic acid metabolic process; GO:0006520 cellular amino acid metabolic process; GO:0006547 histidine metabolic process; GO:0006548 histidine catabolic process; GO:0006725 cellular aromatic compound metabolic process; GO:0006807 nitrogen compound metabolic process; GO:0006950 response to stress; GO:0008152 metabolic process; GO:0009056 catabolic process; GO:0009063 cellular amino acid…	GO:0005622 intracellular; GO:0005623 cell; GO:0005737 cytoplasm; GO:0005829 cytosol; GO:0044424 intracellular part; GO:0044444 cytoplasmic part; GO:0044464 cell part;	GO:0003824 catalytic activity; GO:0004397 histidine ammonia-lyase activity; GO:0016829 lyase activity; GO:0016840 carbon-nitrogen lyase activity; GO:0016841 ammonia-lyase activity;	K01745	hutH, HAL; histidine ammonia-lyase [EC:4.3.1.3]	dre00340 Histidine metabolism - Danio rerio (zebrafish); dre01100 Metabolic pathways - Danio rerio (zebrafish);			Q	KOG0222	Phenylalanine and histidine ammonia-lyase
F02_transcript_29532	Uncharacterized protein	9.6895	20	1	1	1	0.782	0.933	0.877	1.133	1.134	1.176	1.328	0.0057384	extracellular		GO:0005622 intracellular; GO:0005623 cell; GO:0005634 nucleus; GO:0005737 cytoplasm; GO:0005739 mitochondrion; GO:0005740 mitochondrial envelope; GO:0005743 mitochondrial inner membrane; GO:0005746 mitochondrial respiratory chain; GO:0005751 mitochondrial respiratory chain complex IV; GO:0016020 membrane; GO:0019866 organelle inner membrane; GO:0031090 organelle membrane; GO:0031966 mitochondrial…
F02_transcript_18893	finTRIM family, member 82 [Danio rerio]	62.309	9.3	6	7	1	0.964	0.712	0.916	1.189	0.969	1.285	1.328	0.086016	nucleus							PF00643	B-box zinc finger	O	KOG2177	Predicted E3 ubiquitin ligase
F02_transcript_12702	Uncharacterized protein	67.17	9.4	5	9	4	0.83	0.911	0.838	1.195	1.09	1.137	1.327	0.0020596	cytoplasm
F02_transcript_26289	acat1, fd16h07, fd20g06, wu:fd16h07, wu:fd20g06, zgc:86832; acetyl-CoA acetyltransferase 1 (EC:2.3.1.9); K00626 acetyl-CoA C-acetyltransferase [EC:2.3.1.9] (A)	43.827	40.9	15	26	1	0.856	0.761	0.978	1.128	1.076	1.236	1.326	0.026419	mitochondria	GO:0001655 urogenital system development; GO:0001656 metanephros development; GO:0001822 kidney development; GO:0001889 liver development; GO:0006082 organic acid metabolic process; GO:0006084 acetyl-CoA metabolic process; GO:0006085 acetyl-CoA biosynthetic process; GO:0006090 pyruvate metabolic process; GO:0006091 generation of precursor metabolites and energy; GO:0006139 nucleobase-containing c…	GO:0005622 intracellular; GO:0005623 cell; GO:0005737 cytoplasm; GO:0005739 mitochondrion; GO:0005759 mitochondrial matrix; GO:0005777 peroxisome; GO:0031974 membrane-enclosed lumen; GO:0042579 microbody; GO:0043226 organelle; GO:0043227 membrane-bounded organelle; GO:0043229 intracellular organelle; GO:0043231 intracellular membrane-bounded organelle; GO:0043233 organelle lumen; GO:0044422 organ…	GO:0003824 catalytic activity; GO:0003985 acetyl-CoA C-acetyltransferase activity; GO:0003988 acetyl-CoA C-acyltransferase activity; GO:0005488 binding; GO:0005515 protein binding; GO:0016407 acetyltransferase activity; GO:0016408 C-acyltransferase activity; GO:0016453 C-acetyltransferase activity; GO:0016740 transferase activity; GO:0016746 transferase activity, transferring acyl groups; GO:0016…	K00626	E2.3.1.9, atoB; acetyl-CoA C-acetyltransferase [EC:2.3.1.9]	dre00071 Fatty acid degradation - Danio rerio (zebrafish); dre00072 Synthesis and degradation of ketone bodies - Danio rerio (zebrafish); dre00280 Valine, leucine and isoleucine degradation - Danio rerio (zebrafish); dre00310 Lysine degradation - Danio rerio (zebrafish); dre00380 Tryptophan metabolism - Danio rerio (zebrafish); dre00620 Pyruvate metabolism - Danio rerio (zebrafish); dre00630 Glyo…	PF00108; PF02803	Thiolase, N-terminal domain; Thiolase, C-terminal domain	I	KOG1390	Acetyl-CoA acetyltransferase
F02_transcript_4248	Fibroblast growth factor receptor 3 [Exaiptasia pallida]	109.66	52.7	41	252	41	0.895	0.846	0.842	1.122	1.141	1.16	1.325	0.00020388	extracellular							PF12714	TILa domain	VW	KOG1216	von Willebrand factor and related coagulation proteins
F02_transcript_18334	glutaryl-CoA dehydrogenase, mitochondrial-like; K00252 glutaryl-CoA dehydrogenase [EC:1.3.8.6] (A)	48.699	8.6	4	4	4	1.024	0.835	0.741	1.123	1.169	1.152	1.325	0.092917	mitochondria	GO:0006082 organic acid metabolic process; GO:0006139 nucleobase-containing compound metabolic process; GO:0006163 purine nucleotide metabolic process; GO:0006164 purine nucleotide biosynthetic process; GO:0006520 cellular amino acid metabolic process; GO:0006553 lysine metabolic process; GO:0006554 lysine catabolic process; GO:0006568 tryptophan metabolic process; GO:0006575 cellular modified am…	GO:0005622 intracellular; GO:0005623 cell; GO:0005737 cytoplasm; GO:0005739 mitochondrion; GO:0005759 mitochondrial matrix; GO:0031974 membrane-enclosed lumen; GO:0043226 organelle; GO:0043227 membrane-bounded organelle; GO:0043229 intracellular organelle; GO:0043231 intracellular membrane-bounded organelle; GO:0043233 organelle lumen; GO:0044422 organelle part; GO:0044424 intracellular part; GO:…	GO:0000062 fatty-acyl-CoA binding; GO:0000166 nucleotide binding; GO:0003824 catalytic activity; GO:0003995 acyl-CoA dehydrogenase activity; GO:0004361 glutaryl-CoA dehydrogenase activity; GO:0005488 binding; GO:0016491 oxidoreductase activity; GO:0016627 oxidoreductase activity, acting on the CH-CH group of donors; GO:0017076 purine nucleotide binding; GO:0030554 adenyl nucleotide binding; GO:00…	K00252	GCDH, gcdH; glutaryl-CoA dehydrogenase [EC:1.3.8.6]	dre00071 Fatty acid degradation - Danio rerio (zebrafish); dre00310 Lysine degradation - Danio rerio (zebrafish); dre00380 Tryptophan metabolism - Danio rerio (zebrafish); dre01100 Metabolic pathways - Danio rerio (zebrafish);	PF02771; PF02770; PF00441	Acyl-CoA dehydrogenase, N-terminal domain; Acyl-CoA dehydrogenase, middle domain; Acyl-CoA dehydrogenase, C-terminal domain	E	KOG0138	Glutaryl-CoA dehydrogenase
F02_transcript_25331	ctsba, ctsb, id:ibd1201, wu:fa13g05, wu:fb34e12, zgc:55862, zgc:65809, zgc:77181; cathepsin Ba (EC:3.4.22.1); K01363 cathepsin B [EC:3.4.22.1] (A)	36.599	20.5	4	8	4	0.851	0.943	0.758	1.021	1.182	1.179	1.325	0.023523	nucleus	GO:0000003 reproduction; GO:0001775 cell activation; GO:0001890 placenta development; GO:0001893 maternal placenta development; GO:0002252 immune effector process; GO:0002263 cell activation involved in immune response; GO:0002274 myeloid leukocyte activation; GO:0002275 myeloid cell activation involved in immune response; GO:0002283 neutrophil activation involved in immune response; GO:0002366 l…	GO:0000323 lytic vacuole; GO:0005576 extracellular region; GO:0005615 extracellular space; GO:0005622 intracellular; GO:0005623 cell; GO:0005634 nucleus; GO:0005730 nucleolus; GO:0005737 cytoplasm; GO:0005739 mitochondrion; GO:0005764 lysosome; GO:0005768 endosome; GO:0005773 vacuole; GO:0005775 vacuolar lumen; GO:0005886 plasma membrane; GO:0009897 external side of plasma membrane; GO:0009986 ce…	GO:0003824 catalytic activity; GO:0004175 endopeptidase activity; GO:0004197 cysteine-type endopeptidase activity; GO:0004252 serine-type endopeptidase activity; GO:0005488 binding; GO:0005515 protein binding; GO:0005518 collagen binding; GO:0008233 peptidase activity; GO:0008234 cysteine-type peptidase activity; GO:0008236 serine-type peptidase activity; GO:0016787 hydrolase activity; GO:0017171…	K01363	CTSB; cathepsin B [EC:3.4.22.1]	dre04140 Autophagy - animal - Danio rerio (zebrafish); dre04142 Lysosome - Danio rerio (zebrafish); dre04210 Apoptosis - Danio rerio (zebrafish); dre04621 NOD-like receptor signaling pathway - Danio rerio (zebrafish);	PF00112	Papain family cysteine protease	O	KOG1543	Cysteine proteinase Cathepsin L
F02_transcript_26914	phosphatidylethanolamine-binding protein 4 precursor [Bos taurus]	15.094	34.3	4	7	4	0.867	0.865	0.872	1.209	1.112	1.127	1.324	0.0085386	cytoplasm,nucleus							PF01161	Phosphatidylethanolamine-binding protein	S	KOG3346	Phosphatidylethanolamine binding protein
F02_transcript_8362	Papilin, partial [Stegodyphus mimosarum]	44.566	20.5	5	9	5	0.885	0.81	0.919	1.105	1.2	1.151	1.322	0.0032186	extracellular		GO:0005576 extracellular region;		K23421			PF07502; PF00014	MANEC domain; Kunitz/Bovine pancreatic trypsin inhibitor domain	O	KOG4597	Serine proteinase inhibitor (KU family) with thrombospondin repeats
F02_transcript_1560	Transmembrane and coiled-coil domains protein 1 [Zootermopsis nevadensis]	54.514	6.5	3	4	3	0.877	0.917	0.806	1.225	1.033	1.178	1.322	0.0122417	plasma membrane									C	KOG3850	Predicted membrane protein
F02_transcript_24061	lipopolysaccharide-binding protein precursor [Bos taurus]	51.478	14.8	6	8	6	0.858	0.843	0.9	1.143	1.173	1.115	1.319	0.00034188	plasma membrane			GO:0001530 lipopolysaccharide binding; GO:0005488 binding; GO:0005543 phospholipid binding; GO:0008289 lipid binding; GO:0043167 ion binding; GO:0043168 anion binding; GO:0097367 carbohydrate derivative binding;				PF02886	LBP / BPI / CETP family, C-terminal domain	V	KOG4160	BPI/LBP/CETP family protein
F02_transcript_7062	glycine N-methyltransferase-like; K00552 glycine N-methyltransferase [EC:2.1.1.20] (A)	33.368	15.3	4	5	4	0.808	0.877	0.908	1.1	1.168	1.153	1.319	0.002064	cytoplasm	GO:0000096 sulfur amino acid metabolic process; GO:0001505 regulation of neurotransmitter levels; GO:0005975 carbohydrate metabolic process; GO:0005976 polysaccharide metabolic process; GO:0005977 glycogen metabolic process; GO:0006073 cellular glucan metabolic process; GO:0006082 organic acid metabolic process; GO:0006091 generation of precursor metabolites and energy; GO:0006109 regulation of c…	GO:0005622 intracellular; GO:0005623 cell; GO:0005634 nucleus; GO:0005737 cytoplasm; GO:0005829 cytosol; GO:0032991 macromolecular complex; GO:0034708 methyltransferase complex; GO:0043226 organelle; GO:0043227 membrane-bounded organelle; GO:0043229 intracellular organelle; GO:0043231 intracellular membrane-bounded organelle; GO:0044424 intracellular part; GO:0044444 cytoplasmic part; GO:0044464 …	GO:0003824 catalytic activity; GO:0005488 binding; GO:0005515 protein binding; GO:0005542 folic acid binding; GO:0008144 drug binding; GO:0008168 methyltransferase activity; GO:0008170 N-methyltransferase activity; GO:0008757 S-adenosylmethionine-dependent methyltransferase activity; GO:0016594 glycine binding; GO:0016597 amino acid binding; GO:0016740 transferase activity; GO:0016741 transferase…	K00552	GNMT; glycine N-methyltransferase [EC:2.1.1.20]	dre00260 Glycine, serine and threonine metabolism - Danio rerio (zebrafish); dre01100 Metabolic pathways - Danio rerio (zebrafish);	PF13847	Methyltransferase domain
F02_transcript_5542	BRISC complex subunit Abraxas 2-like [Stylophora pistillata]	48.191	10.5	3	3	3	0.789	0.947	0.866	1.179	1.11	1.14	1.318	0.0074022	cytoplasm	GO:0000226 microtubule cytoskeleton organization; GO:0000278 mitotic cell cycle; GO:0000280 nuclear division; GO:0002931 response to ischemia; GO:0006464 cellular protein modification process; GO:0006508 proteolysis; GO:0006807 nitrogen compound metabolic process; GO:0006950 response to stress; GO:0006996 organelle organization; GO:0007010 cytoskeleton organization; GO:0007017 microtubule-based p…	GO:0005622 intracellular; GO:0005623 cell; GO:0005634 nucleus; GO:0005737 cytoplasm; GO:0005829 cytosol; GO:0032991 macromolecular complex; GO:0043226 organelle; GO:0043227 membrane-bounded organelle; GO:0043229 intracellular organelle; GO:0043231 intracellular membrane-bounded organelle; GO:0044422 organelle part; GO:0044424 intracellular part; GO:0044428 nuclear part; GO:0044444 cytoplasmic par…	GO:0005488 binding; GO:0005515 protein binding; GO:0008017 microtubule binding; GO:0008092 cytoskeletal protein binding; GO:0015631 tubulin binding; GO:0031593 polyubiquitin binding;	K20799	FAM175B, ABRO1; BRISC complex subunit Abro1
F02_transcript_8310	glud1b, cb719, glud1, wu:fb16e02, wu:fb58f12, wu:fe37f03, wu:fj43f02, zgc:192851, zgc:55630; glutamate dehydrogenase 1b (EC:1.4.1.3); K00261 glutamate dehydrogenase (NAD(P)+) [EC:1.4.1.3] (A)	59.935	45.3	23	75	1	1.074	0.784	0.752	1.126	1.088	1.22	1.316	0.071498	cytoplasm	GO:0002791 regulation of peptide secretion; GO:0002793 positive regulation of peptide secretion; GO:0003008 system process; GO:0006082 organic acid metabolic process; GO:0006103 2-oxoglutarate metabolic process; GO:0006106 fumarate metabolic process; GO:0006116 NADH oxidation; GO:0006139 nucleobase-containing compound metabolic process; GO:0006520 cellular amino acid metabolic process; GO:0006536…	GO:0005622 intracellular; GO:0005623 cell; GO:0005737 cytoplasm; GO:0005739 mitochondrion; GO:0005740 mitochondrial envelope; GO:0005743 mitochondrial inner membrane; GO:0005759 mitochondrial matrix; GO:0016020 membrane; GO:0019866 organelle inner membrane; GO:0031090 organelle membrane; GO:0031966 mitochondrial membrane; GO:0031967 organelle envelope; GO:0031974 membrane-enclosed lumen; GO:00319…	GO:0000166 nucleotide binding; GO:0001882 nucleoside binding; GO:0001883 purine nucleoside binding; GO:0003824 catalytic activity; GO:0004352 glutamate dehydrogenase (NAD+) activity; GO:0004353 glutamate dehydrogenase [NAD(P)+] activity; GO:0005488 binding; GO:0005515 protein binding; GO:0005525 GTP binding; GO:0016491 oxidoreductase activity; GO:0016597 amino acid binding; GO:0016638 oxidoreduct…	K00261	GLUD1_2, gdhA; glutamate dehydrogenase (NAD(P)+) [EC:1.4.1.3]	dre00220 Arginine biosynthesis - Danio rerio (zebrafish); dre00250 Alanine, aspartate and glutamate metabolism - Danio rerio (zebrafish); dre00471 D-Glutamine and D-glutamate metabolism - Danio rerio (zebrafish); dre00910 Nitrogen metabolism - Danio rerio (zebrafish); dre01100 Metabolic pathways - Danio rerio (zebrafish); dre01200 Carbon metabolism - Danio rerio (zebrafish); dre04217 Necroptosis …	PF02812; PF00208	Glu/Leu/Phe/Val dehydrogenase, dimerisation domain; Glutamate/Leucine/Phenylalanine/Valine dehydrogenase	E	KOG2250	Glutamate/leucine/phenylalanine/valine dehydrogenases
F02_transcript_20624	TRA2B; transformer 2 beta homolog (Drosophila); K12897 transformer-2 protein (A)	21.955	4.1	1	1	1	0.873	0.765	0.969	1.154	1.155	1.12	1.315	0.05642	nucleus	GO:0000003 reproduction; GO:0000245 spliceosomal complex assembly; GO:0000302 response to reactive oxygen species; GO:0000375 RNA splicing, via transesterification reactions; GO:0000377 RNA splicing, via transesterification reactions with bulged adenosine as nucleophile; GO:0000381 regulation of alternative mRNA splicing, via spliceosome; GO:0000398 mRNA splicing, via spliceosome; GO:0001678 cell…	GO:0005622 intracellular; GO:0005623 cell; GO:0005634 nucleus; GO:0005654 nucleoplasm; GO:0005681 spliceosomal complex; GO:0005737 cytoplasm; GO:0031974 membrane-enclosed lumen; GO:0031981 nuclear lumen; GO:0032991 macromolecular complex; GO:0043226 organelle; GO:0043227 membrane-bounded organelle; GO:0043229 intracellular organelle; GO:0043231 intracellular membrane-bounded organelle; GO:0043233…	GO:0003676 nucleic acid binding; GO:0003723 RNA binding; GO:0003727 single-stranded RNA binding; GO:0003729 mRNA binding; GO:0005488 binding; GO:0005515 protein binding; GO:0019904 protein domain specific binding; GO:0036002 pre-mRNA binding; GO:0042802 identical protein binding; GO:0070717 poly-purine tract binding; GO:0097159 organic cyclic compound binding; GO:1901363 heterocyclic compound bin…	K12897	TRA2; transformer-2 protein	dre03040 Spliceosome - Danio rerio (zebrafish);	PF00076	RNA recognition motif. (a.k.a. RRM, RBD, or RNP domain)	A	KOG0118	FOG: RRM domain
F02_transcript_87	Sterile alpha motif domain-containing protein 9-like [Stylophora pistillata]	110.43	4.1	3	3	3	0.842	0.922	0.843	1.173	1.097	1.157	1.315	0.00165916	cytoplasm							PF07647	SAM domain (Sterile alpha motif)
F02_transcript_15352	proactivator polypeptide-like; K12382 saposin (A)	34.032	21.8	6	11	6	0.869	0.913	0.875	1.156	1.088	1.243	1.312	0.0028559	cytoplasm	GO:0000003 reproduction; GO:0001655 urogenital system development; GO:0001775 cell activation; GO:0001932 regulation of protein phosphorylation; GO:0001934 positive regulation of protein phosphorylation; GO:0002252 immune effector process; GO:0002263 cell activation involved in immune response; GO:0002274 myeloid leukocyte activation; GO:0002275 myeloid cell activation involved in immune response…	GO:0000323 lytic vacuole; GO:0005576 extracellular region; GO:0005615 extracellular space; GO:0005622 intracellular; GO:0005623 cell; GO:0005737 cytoplasm; GO:0005764 lysosome; GO:0005765 lysosomal membrane; GO:0005766 primary lysosome; GO:0005768 endosome; GO:0005770 late endosome; GO:0005773 vacuole; GO:0005774 vacuolar membrane; GO:0005775 vacuolar lumen; GO:0005776 autophagosome; GO:0005886 p…	GO:0001664 G-protein coupled receptor binding; GO:0003824 catalytic activity; GO:0004553 hydrolase activity, hydrolyzing O-glycosyl compounds; GO:0004565 beta-galactosidase activity; GO:0005102 receptor binding; GO:0005488 binding; GO:0005515 protein binding; GO:0005543 phospholipid binding; GO:0008047 enzyme activator activity; GO:0008289 lipid binding; GO:0015925 galactosidase activity; GO:0016…	K12382	PSAP, SGP1; saposin	dre04142 Lysosome - Danio rerio (zebrafish);	PF05184	Saposin-like type B, region 1	GI	KOG1340	Prosaposin
F02_transcript_29102	rbp4, rbp, wu:fb58d04, wu:fb72b04, zgc:86911; retinol binding protein 4, plasma; K18271 retinol-binding protein 4 (A)	22.04	5.7	1	1	1	0.908	0.884	0.819	1.152	1.104	1.169	1.312	0.00153702	extracellular	GO:0000003 reproduction; GO:0001101 response to acid chemical; GO:0001501 skeletal system development; GO:0001523 retinoid metabolic process; GO:0001555 oocyte growth; GO:0001654 eye development; GO:0001655 urogenital system development; GO:0001894 tissue homeostasis; GO:0002637 regulation of immunoglobulin production; GO:0002639 positive regulation of immunoglobulin production; GO:0002682 regula…	GO:0005576 extracellular region; GO:0005615 extracellular space; GO:0005622 intracellular; GO:0005623 cell; GO:0005737 cytoplasm; GO:0005829 cytosol; GO:0030135 coated vesicle; GO:0030136 clathrin-coated vesicle; GO:0031410 cytoplasmic vesicle; GO:0031982 vesicle; GO:0032991 macromolecular complex; GO:0043226 organelle; GO:0043227 membrane-bounded organelle; GO:0043229 intracellular organelle; GO…	GO:0005102 receptor binding; GO:0005215 transporter activity; GO:0005319 lipid transporter activity; GO:0005488 binding; GO:0005501 retinoid binding; GO:0005515 protein binding; GO:0008289 lipid binding; GO:0015318 inorganic solute uptake transmembrane transporter activity; GO:0015665 alcohol transmembrane transporter activity; GO:0019840 isoprenoid binding; GO:0019841 retinol binding; GO:0019842…	K18271	RBP4; retinol-binding protein 4		PF00061	Lipocalin / cytosolic fatty-acid binding protein family
F02_transcript_20344	ctsc, cb912, ik:tdsubc_1h2, sb:cb146, wu:fb34g12, wu:fj58d01; cathepsin C (EC:3.4.14.1); K01275 cathepsin C [EC:3.4.14.1] (A)	51.373	15.5	5	10	5	0.942	0.827	0.832	1.127	1.164	1.117	1.31	0.0035573	mitochondria	GO:0001775 cell activation; GO:0001906 cell killing; GO:0001909 leukocyte mediated cytotoxicity; GO:0001913 T cell mediated cytotoxicity; GO:0002250 adaptive immune response; GO:0002252 immune effector process; GO:0002263 cell activation involved in immune response; GO:0002274 myeloid leukocyte activation; GO:0002275 myeloid cell activation involved in immune response; GO:0002283 neutrophil activ…	GO:0000323 lytic vacuole; GO:0005576 extracellular region; GO:0005615 extracellular space; GO:0005622 intracellular; GO:0005623 cell; GO:0005634 nucleus; GO:0005654 nucleoplasm; GO:0005737 cytoplasm; GO:0005764 lysosome; GO:0005766 primary lysosome; GO:0005773 vacuole; GO:0005775 vacuolar lumen; GO:0005783 endoplasmic reticulum; GO:0005788 endoplasmic reticulum lumen; GO:0005793 endoplasmic retic…	GO:0003824 catalytic activity; GO:0004175 endopeptidase activity; GO:0004197 cysteine-type endopeptidase activity; GO:0004252 serine-type endopeptidase activity; GO:0005488 binding; GO:0005515 protein binding; GO:0008047 enzyme activator activity; GO:0008233 peptidase activity; GO:0008234 cysteine-type peptidase activity; GO:0008236 serine-type peptidase activity; GO:0016504 peptidase activator a…	K01275	CTSC; cathepsin C [EC:3.4.14.1]	dre04142 Lysosome - Danio rerio (zebrafish); dre04210 Apoptosis - Danio rerio (zebrafish);	PF08773; PF00112	Cathepsin C exclusion domain; Papain family cysteine protease	O	KOG1543	Cysteine proteinase Cathepsin L
F02_transcript_6359	Uncharacterized protein	52.795	16.4	7	7	1	0.908	0.541	1.167	1.098	1.233	1.093	1.309	0.24088	extracellular	GO:0006040 amino sugar metabolic process; GO:0006047 UDP-N-acetylglucosamine metabolic process; GO:0006139 nucleobase-containing compound metabolic process; GO:0006464 cellular protein modification process; GO:0006486 protein glycosylation; GO:0006487 protein N-linked glycosylation; GO:0006725 cellular aromatic compound metabolic process; GO:0006793 phosphorus metabolic process; GO:0006807 nitrog…	GO:0000139 Golgi membrane; GO:0005622 intracellular; GO:0005623 cell; GO:0005737 cytoplasm; GO:0005794 Golgi apparatus; GO:0012505 endomembrane system; GO:0016020 membrane; GO:0016021 integral component of membrane; GO:0031090 organelle membrane; GO:0031224 intrinsic component of membrane; GO:0031984 organelle subcompartment; GO:0043226 organelle; GO:0043227 membrane-bounded organelle; GO:0043229…	GO:0003824 catalytic activity; GO:0008194 UDP-glycosyltransferase activity; GO:0008376 acetylgalactosaminyltransferase activity; GO:0016740 transferase activity; GO:0016757 transferase activity, transferring glycosyl groups; GO:0016758 transferase activity, transferring hexosyl groups;
F02_transcript_3240	START domain-containing protein 10 isoform 2 [Mus musculus]	24.997	31.4	4	5	4	0.938	0.633	1.039	1.354	1.009	1.054	1.309	0.185001	extracellular							PF01852	START domain	I	KOG2761	START domain-containing proteins involved in steroidogenesis/phosphatidylcholine transfer
F02_transcript_6882	nuclear transcription factor Y subunit alpha-like; K08064 nuclear transcription factor Y, alpha (A)	32.347	6.3	1	1	1	0.733	1.002	0.878	1.149	1.078	1.19	1.308	0.044239	nucleus	GO:0006139 nucleobase-containing compound metabolic process; GO:0006351 transcription, DNA-templated; GO:0006355 regulation of transcription, DNA-templated; GO:0006357 regulation of transcription from RNA polymerase II promoter; GO:0006366 transcription from RNA polymerase II promoter; GO:0006725 cellular aromatic compound metabolic process; GO:0006807 nitrogen compound metabolic process; GO:0008…	GO:0005622 intracellular; GO:0005623 cell; GO:0005634 nucleus; GO:0005654 nucleoplasm; GO:0005667 transcription factor complex; GO:0016602 CCAAT-binding factor complex; GO:0031974 membrane-enclosed lumen; GO:0031981 nuclear lumen; GO:0032991 macromolecular complex; GO:0032993 protein-DNA complex; GO:0043226 organelle; GO:0043227 membrane-bounded organelle; GO:0043229 intracellular organelle; GO:0…	GO:0000976 transcription regulatory region sequence-specific DNA binding; GO:0000977 RNA polymerase II regulatory region sequence-specific DNA binding; GO:0000978 RNA polymerase II core promoter proximal region sequence-specific DNA binding; GO:0000981 RNA polymerase II transcription factor activity, sequence-specific DNA binding; GO:0000982 transcription factor activity, RNA polymerase II core p…	K08064	NFYA; nuclear transcription factor Y, alpha				K	KOG1561	CCAAT-binding factor, subunit B (HAP2)
F02_transcript_2250	rhogb, ARHG, rhog, wu:fk30f01, zgc:55848; ras homolog family member Gb; K07863 Ras homolog gene family, member G (A)	21.245	24.6	4	6	2	0.774	0.802	1.039	1.057	1.056	1.307	1.308	0.080297	cytoplasm	GO:0001775 cell activation; GO:0002252 immune effector process; GO:0002263 cell activation involved in immune response; GO:0002274 myeloid leukocyte activation; GO:0002275 myeloid cell activation involved in immune response; GO:0002283 neutrophil activation involved in immune response; GO:0002366 leukocyte activation involved in immune response; GO:0002376 immune system process; GO:0002443 leukoc…	GO:0005622 intracellular; GO:0005623 cell; GO:0005737 cytoplasm; GO:0005783 endoplasmic reticulum; GO:0005789 endoplasmic reticulum membrane; GO:0005829 cytosol; GO:0005886 plasma membrane; GO:0012505 endomembrane system; GO:0012506 vesicle membrane; GO:0016020 membrane; GO:0030141 secretory granule; GO:0030659 cytoplasmic vesicle membrane; GO:0030667 secretory granule membrane; GO:0031090 organe…	GO:0003824 catalytic activity; GO:0003924 GTPase activity; GO:0016462 pyrophosphatase activity; GO:0016787 hydrolase activity; GO:0016817 hydrolase activity, acting on acid anhydrides; GO:0016818 hydrolase activity, acting on acid anhydrides, in phosphorus-containing anhydrides; GO:0017111 nucleoside-triphosphatase activity;	K07863	RHOG; Ras homolog gene family, member G	dre05132 Salmonella infection - Danio rerio (zebrafish);	PF00071	Ras family	U	KOG0393	Ras-related small GTPase, Rho type
F02_transcript_19936	cyb5r1, dia1, wu:fb13e02, wu:fb15h03, zgc:56042; cytochrome b5 reductase 1 (EC:1.6.2.2); K00326 cytochrome-b5 reductase [EC:1.6.2.2] (A)	33.861	21.6	7	12	2	0.987	0.601	1.032	1.093	1.254	1.077	1.307	0.178277	extracellular	GO:0002576 platelet degranulation; GO:0006810 transport; GO:0006811 ion transport; GO:0006820 anion transport; GO:0006887 exocytosis; GO:0006890 retrograde vesicle-mediated transport, Golgi to ER; GO:0008152 metabolic process; GO:0009987 cellular process; GO:0010883 regulation of lipid storage; GO:0015701 bicarbonate transport; GO:0015711 organic anion transport; GO:0016192 vesicle-mediated trans…	GO:0005622 intracellular; GO:0005623 cell; GO:0005737 cytoplasm; GO:0005783 endoplasmic reticulum; GO:0005789 endoplasmic reticulum membrane; GO:0005794 Golgi apparatus; GO:0005798 Golgi-associated vesicle; GO:0005886 plasma membrane; GO:0012505 endomembrane system; GO:0012506 vesicle membrane; GO:0016020 membrane; GO:0030117 membrane coat; GO:0030120 vesicle coat; GO:0030126 COPI vesicle coat; G…	GO:0003824 catalytic activity; GO:0004128 cytochrome-b5 reductase activity, acting on NAD(P)H; GO:0016491 oxidoreductase activity; GO:0016651 oxidoreductase activity, acting on NAD(P)H; GO:0016653 oxidoreductase activity, acting on NAD(P)H, heme protein as acceptor;	K00326	E1.6.2.2; cytochrome-b5 reductase [EC:1.6.2.2]	dre00520 Amino sugar and nucleotide sugar metabolism - Danio rerio (zebrafish);	PF00970; PF00175	Oxidoreductase FAD-binding domain; Oxidoreductase NAD-binding domain	C	KOG0534	NADH-cytochrome b-5 reductase
F02_transcript_21548	histone H1t [Homo sapiens]	21.451	30.3	7	13	7	0.857	0.876	0.867	1.125	1.113	1.16	1.307	4.157e-05	nucleus				K11275	H1_5; histone H1/5		PF00538	linker histone H1 and H5 family	B	KOG4012	Histone H1
F02_transcript_2536	4-aminobutyrate aminotransferase, mitochondrial-like; K13524 4-aminobutyrate aminotransferase / (S)-3-amino-2-methylpropionate transaminase [EC:2.6.1.19 2.6.1.22] (A)	39.071	24.3	7	10	7	0.886	0.852	0.853	1.087	1.142	1.157	1.307	0.00030487	cytoplasm	GO:0000003 reproduction; GO:0000820 regulation of glutamine family amino acid metabolic process; GO:0001505 regulation of neurotransmitter levels; GO:0001666 response to hypoxia; GO:0002791 regulation of peptide secretion; GO:0002793 positive regulation of peptide secretion; GO:0003008 system process; GO:0003013 circulatory system process; GO:0006082 organic acid metabolic process; GO:0006109 reg…	GO:0005622 intracellular; GO:0005623 cell; GO:0005737 cytoplasm; GO:0005739 mitochondrion; GO:0005759 mitochondrial matrix; GO:0005829 cytosol; GO:0031974 membrane-enclosed lumen; GO:0032144 4-aminobutyrate transaminase complex; GO:0032991 macromolecular complex; GO:0042995 cell projection; GO:0043005 neuron projection; GO:0043226 organelle; GO:0043227 membrane-bounded organelle; GO:0043229 intra…	GO:0003824 catalytic activity; GO:0003867 4-aminobutyrate transaminase activity; GO:0005488 binding; GO:0005515 protein binding; GO:0008144 drug binding; GO:0008483 transaminase activity; GO:0016740 transferase activity; GO:0016769 transferase activity, transferring nitrogenous groups; GO:0019842 vitamin binding; GO:0019899 enzyme binding; GO:0030170 pyridoxal phosphate binding; GO:0032145 succin…	K13524	ABAT; 4-aminobutyrate aminotransferase / (S)-3-amino-2-methylpropionate transaminase [EC:2.6.1.19 2.6.1.22]	dre00250 Alanine, aspartate and glutamate metabolism - Danio rerio (zebrafish); dre00280 Valine, leucine and isoleucine degradation - Danio rerio (zebrafish); dre00410 beta-Alanine metabolism - Danio rerio (zebrafish); dre00640 Propanoate metabolism - Danio rerio (zebrafish); dre00650 Butanoate metabolism - Danio rerio (zebrafish); dre01100 Metabolic pathways - Danio rerio (zebrafish);	PF00202	Aminotransferase class-III	E	KOG1405	4-aminobutyrate aminotransferase
F02_transcript_8010	STAT1; signal transducer and activator of transcription 1, 91kDa; K11220 signal transducer and activator of transcription 1 (A)	87.075	16.3	11	15	7	0.874	0.86	0.838	1.069	1.166	1.122	1.305	0.00068107	nucleus	GO:0000122 negative regulation of transcription from RNA polymerase II promoter; GO:0001655 urogenital system development; GO:0001656 metanephros development; GO:0001817 regulation of cytokine production; GO:0001819 positive regulation of cytokine production; GO:0001822 kidney development; GO:0001936 regulation of endothelial cell proliferation; GO:0001937 negative regulation of endothelial cell …	GO:0000228 nuclear chromosome; GO:0000785 chromatin; GO:0000790 nuclear chromatin; GO:0005622 intracellular; GO:0005623 cell; GO:0005634 nucleus; GO:0005654 nucleoplasm; GO:0005694 chromosome; GO:0005730 nucleolus; GO:0005737 cytoplasm; GO:0005829 cytosol; GO:0030424 axon; GO:0030425 dendrite; GO:0031974 membrane-enclosed lumen; GO:0031981 nuclear lumen; GO:0032991 macromolecular complex; GO:0036…	GO:0000976 transcription regulatory region sequence-specific DNA binding; GO:0000977 RNA polymerase II regulatory region sequence-specific DNA binding; GO:0000978 RNA polymerase II core promoter proximal region sequence-specific DNA binding; GO:0000979 RNA polymerase II core promoter sequence-specific DNA binding; GO:0000981 RNA polymerase II transcription factor activity, sequence-specific DNA b…	K11220	STAT1; signal transducer and activator of transcription 1	dre04217 Necroptosis - Danio rerio (zebrafish); dre04620 Toll-like receptor signaling pathway - Danio rerio (zebrafish); dre04621 NOD-like receptor signaling pathway - Danio rerio (zebrafish); dre04625 C-type lectin receptor signaling pathway - Danio rerio (zebrafish); dre04933 AGE-RAGE signaling pathway in diabetic complications - Danio rerio (zebrafish); dre05168 Herpes simplex virus 1 infectio…	PF02865; PF02864; PF00017	STAT protein, protein interaction domain; STAT protein, DNA binding domain; SH2 domain	K	KOG3667	STAT protein
F02_transcript_654	Uncharacterized protein	65.704	2.3	1	1	1	0.941	0.787	0.893	1.117	1.225	1.077	1.304	0.0150787	cytoplasm				K19016	IMPG1, SPACR; interphotoreceptor matrix proteoglycan 1
F02_transcript_20205	inosine-5'-monophosphate dehydrogenase 1-like; K00088 IMP dehydrogenase [EC:1.1.1.205] (A)	26.822	13.1	3	4	2	0.862	0.891	0.855	1.142	1.17	1.085	1.303	0.00049798	cytoplasm	GO:0000902 cell morphogenesis; GO:0000904 cell morphogenesis involved in differentiation; GO:0001654 eye development; GO:0001775 cell activation; GO:0002252 immune effector process; GO:0002263 cell activation involved in immune response; GO:0002274 myeloid leukocyte activation; GO:0002275 myeloid cell activation involved in immune response; GO:0002283 neutrophil activation involved in immune resp…	GO:0000323 lytic vacuole; GO:0005576 extracellular region; GO:0005622 intracellular; GO:0005623 cell; GO:0005634 nucleus; GO:0005737 cytoplasm; GO:0005764 lysosome; GO:0005766 primary lysosome; GO:0005773 vacuole; GO:0005775 vacuolar lumen; GO:0005829 cytosol; GO:0012505 endomembrane system; GO:0030141 secretory granule; GO:0031410 cytoplasmic vesicle; GO:0031974 membrane-enclosed lumen; GO:00319…	GO:0003676 nucleic acid binding; GO:0003677 DNA binding; GO:0003824 catalytic activity; GO:0003938 IMP dehydrogenase activity; GO:0005488 binding; GO:0016491 oxidoreductase activity; GO:0016614 oxidoreductase activity, acting on CH-OH group of donors; GO:0016616 oxidoreductase activity, acting on the CH-OH group of donors, NAD or NADP as acceptor; GO:0097159 organic cyclic compound binding; GO:19…	K00088	IMPDH, guaB; IMP dehydrogenase [EC:1.1.1.205]	dre00230 Purine metabolism - Danio rerio (zebrafish); dre00983 Drug metabolism - other enzymes - Danio rerio (zebrafish); dre01100 Metabolic pathways - Danio rerio (zebrafish);	PF00478	IMP dehydrogenase / GMP reductase domain	F	KOG2550	IMP dehydrogenase/GMP reductase
F02_transcript_29509	fibropellin-1-like [Acanthaster planci]	18.494	51.5	6	92	6	0.881	0.878	0.829	1.095	1.183	1.093	1.303	0.0012793	extracellular				K06560	MRC, CD206, CD280; mannose receptor, C type	dre04145 Phagosome - Danio rerio (zebrafish);	PF00059	Lectin C-type domain	TV	KOG4297	C-type lectin
F02_transcript_25932	fructose-bisphosphate aldolase B-like; K01623 fructose-bisphosphate aldolase, class I [EC:4.1.2.13] (A)	39.154	64.6	21	63	19	0.884	0.856	0.901	1.143	1.161	1.134	1.302	8.4376e-05	cytoplasm	GO:0001101 response to acid chemical; GO:0001889 liver development; GO:0005975 carbohydrate metabolic process; GO:0005996 monosaccharide metabolic process; GO:0006000 fructose metabolic process; GO:0006001 fructose catabolic process; GO:0006006 glucose metabolic process; GO:0006007 glucose catabolic process; GO:0006081 cellular aldehyde metabolic process; GO:0006082 organic acid metabolic process…	GO:0000323 lytic vacuole; GO:0005576 extracellular region; GO:0005615 extracellular space; GO:0005622 intracellular; GO:0005623 cell; GO:0005634 nucleus; GO:0005737 cytoplasm; GO:0005764 lysosome; GO:0005773 vacuole; GO:0005783 endoplasmic reticulum; GO:0005789 endoplasmic reticulum membrane; GO:0005790 smooth endoplasmic reticulum; GO:0005791 rough endoplasmic reticulum; GO:0005813 centrosome; G…	GO:0003824 catalytic activity; GO:0004332 fructose-bisphosphate aldolase activity; GO:0005488 binding; GO:0005515 protein binding; GO:0005543 phospholipid binding; GO:0008092 cytoskeletal protein binding; GO:0008289 lipid binding; GO:0016829 lyase activity; GO:0016830 carbon-carbon lyase activity; GO:0016832 aldehyde-lyase activity; GO:0019899 enzyme binding; GO:0030246 carbohydrate binding; GO:0…	K01623	ALDO; fructose-bisphosphate aldolase, class I [EC:4.1.2.13]	dre00010 Glycolysis / Gluconeogenesis - Danio rerio (zebrafish); dre00030 Pentose phosphate pathway - Danio rerio (zebrafish); dre00051 Fructose and mannose metabolism - Danio rerio (zebrafish); dre01100 Metabolic pathways - Danio rerio (zebrafish); dre01200 Carbon metabolism - Danio rerio (zebrafish); dre01230 Biosynthesis of amino acids - Danio rerio (zebrafish);	PF00274	Fructose-bisphosphate aldolase class-I	G	KOG1557	Fructose-biphosphate aldolase
F02_transcript_29050	Uncharacterized protein	16.643	44.2	6	8	6	0.875	0.909	0.857	1.171	1.238	1.026	1.301	0.0111585	extracellular
F02_transcript_9266	V-type proton ATPase subunit S1-like; K03662 V-type H+-transporting ATPase S1 subunit (A)	50.522	3.8	1	1	1	1.13	0.612	0.886	1.26	1.114	1.039	1.299	0.197025	extracellular	GO:0000041 transition metal ion transport; GO:0001932 regulation of protein phosphorylation; GO:0001934 positive regulation of protein phosphorylation; GO:0002682 regulation of immune system process; GO:0002684 positive regulation of immune system process; GO:0002761 regulation of myeloid leukocyte differentiation; GO:0002763 positive regulation of myeloid leukocyte differentiation; GO:0006810 tr…	GO:0005622 intracellular; GO:0005623 cell; GO:0005737 cytoplasm; GO:0005768 endosome; GO:0005886 plasma membrane; GO:0010008 endosome membrane; GO:0012505 endomembrane system; GO:0016020 membrane; GO:0016469 proton-transporting two-sector ATPase complex; GO:0031090 organelle membrane; GO:0031410 cytoplasmic vesicle; GO:0031982 vesicle; GO:0032991 macromolecular complex; GO:0033176 proton-transpor…	GO:0005215 transporter activity; GO:0005488 binding; GO:0005515 protein binding; GO:0017016 Ras GTPase binding; GO:0017137 Rab GTPase binding; GO:0019899 enzyme binding; GO:0031267 small GTPase binding; GO:0051020 GTPase binding;	K03662	ATPeVS1, ATP6S1; V-type H+-transporting ATPase S1 subunit	dre00190 Oxidative phosphorylation - Danio rerio (zebrafish); dre01100 Metabolic pathways - Danio rerio (zebrafish); dre04142 Lysosome - Danio rerio (zebrafish); dre04145 Phagosome - Danio rerio (zebrafish);			C	KOG3868	Vacuolar H+-ATPase V0 sector, accessory subunit S1 (Ac45)
F02_transcript_27873	hbaa1, AA1, dZ118J2.2; hemoglobin, alpha adult 1; K13826 hemoglobin subunit zeta (A)	8.9725	43.9	3	5	3	0.893	0.825	0.903	1.255	0.924	1.223	1.298	0.068816	mitochondria	GO:0000122 negative regulation of transcription from RNA polymerase II promoter; GO:0001666 response to hypoxia; GO:0002262 myeloid cell homeostasis; GO:0002376 immune system process; GO:0002520 immune system development; GO:0006355 regulation of transcription, DNA-templated; GO:0006357 regulation of transcription from RNA polymerase II promoter; GO:0006810 transport; GO:0006950 response to stres…	GO:0005622 intracellular; GO:0005623 cell; GO:0005737 cytoplasm; GO:0005829 cytosol; GO:0005833 hemoglobin complex; GO:0032991 macromolecular complex; GO:0044424 intracellular part; GO:0044444 cytoplasmic part; GO:0044445 cytosolic part; GO:0044464 cell part;	GO:0005344 oxygen transporter activity;	K13826	HBZ; hemoglobin subunit zeta		PF00042	Globin	C	KOG3378	Globins and related hemoproteins
F02_transcript_20358	sps2, cb701, zgc:92096; selenophosphate synthetase 2 (EC:2.7.9.3); K01008 selenide, water dikinase [EC:2.7.9.3] (A)	36.867	14.4	3	5	3	0.923	0.698	0.91	1.059	1.15	1.074	1.297	0.047123	cytoplasm	GO:0001887 selenium compound metabolic process; GO:0006082 organic acid metabolic process; GO:0006520 cellular amino acid metabolic process; GO:0006541 glutamine metabolic process; GO:0006793 phosphorus metabolic process; GO:0006796 phosphate-containing compound metabolic process; GO:0006807 nitrogen compound metabolic process; GO:0006996 organelle organization; GO:0007005 mitochondrion organizat…	GO:0005622 intracellular; GO:0005623 cell; GO:0005737 cytoplasm; GO:0005829 cytosol; GO:0044424 intracellular part; GO:0044444 cytoplasmic part; GO:0044464 cell part;	GO:0003824 catalytic activity; GO:0004756 selenide, water dikinase activity; GO:0016301 kinase activity; GO:0016740 transferase activity; GO:0016772 transferase activity, transferring phosphorus-containing groups; GO:0016781 phosphotransferase activity, paired acceptors;	K01008	selD, SEPHS; selenide, water dikinase [EC:2.7.9.3]	dre00450 Selenocompound metabolism - Danio rerio (zebrafish); dre01100 Metabolic pathways - Danio rerio (zebrafish);	PF00586; PF02769	AIR synthase related protein, N-terminal domain; AIR synthase related protein, C-terminal domain	T	KOG3939	Selenophosphate synthetase
F02_transcript_23338	Uncharacterized protein	53.335	4.9	2	3	2	0.894	0.856	0.877	1.178	1.027	1.2	1.296	0.0071042	nucleus		GO:0005622 intracellular; GO:0005623 cell; GO:0005856 cytoskeleton; GO:0015629 actin cytoskeleton; GO:0043226 organelle; GO:0043228 non-membrane-bounded organelle; GO:0043229 intracellular organelle; GO:0043232 intracellular non-membrane-bounded organelle; GO:0044424 intracellular part; GO:0044464 cell part;	GO:0005198 structural molecule activity;
F02_transcript_25243	Protein archease [Stylophora pistillata]	18.929	4.9	1	1	1	0.861	0.838	0.931	1.19	1.052	1.16	1.294	0.0063427	cytoplasm	GO:0000394 RNA splicing, via endonucleolytic cleavage and ligation; GO:0006139 nucleobase-containing compound metabolic process; GO:0006388 tRNA splicing, via endonucleolytic cleavage and ligation; GO:0006396 RNA processing; GO:0006399 tRNA metabolic process; GO:0006725 cellular aromatic compound metabolic process; GO:0006807 nitrogen compound metabolic process; GO:0007275 multicellular organism …	GO:0005622 intracellular; GO:0005623 cell; GO:0005634 nucleus; GO:0005654 nucleoplasm; GO:0031974 membrane-enclosed lumen; GO:0031981 nuclear lumen; GO:0032991 macromolecular complex; GO:0043226 organelle; GO:0043227 membrane-bounded organelle; GO:0043229 intracellular organelle; GO:0043231 intracellular membrane-bounded organelle; GO:0043233 organelle lumen; GO:0044422 organelle part; GO:0044424…					PF01951	Archease protein family (MTH1598/TM1083)	S	KOG4528	Uncharacterized conserved protein
F02_transcript_25545	Inosine-uridine preferring nucleoside hydrolase [Stylophora pistillata]	32.307	9.4	3	4	3	0.899	0.911	0.835	1.124	1.016	1.281	1.293	0.024822	cytoplasm							PF01156	Inosine-uridine preferring nucleoside hydrolase	F	KOG2938	Predicted inosine-uridine preferring nucleoside hydrolase
F02_transcript_18759	caspase-6-like; K04396 caspase 6 [EC:3.4.22.59] (A)	31.108	22.3	6	16	1	0.855	0.89	0.888	1.073	1.18	1.152	1.293	0.00121896	cytoplasm	GO:0000302 response to reactive oxygen species; GO:0001654 eye development; GO:0002088 lens development in camera-type eye; GO:0002525 acute inflammatory response to non-antigenic stimulus; GO:0002526 acute inflammatory response; GO:0006508 proteolysis; GO:0006807 nitrogen compound metabolic process; GO:0006915 apoptotic process; GO:0006950 response to stress; GO:0006952 defense response; GO:0006…	GO:0005622 intracellular; GO:0005623 cell; GO:0005634 nucleus; GO:0005654 nucleoplasm; GO:0005737 cytoplasm; GO:0005829 cytosol; GO:0031974 membrane-enclosed lumen; GO:0031981 nuclear lumen; GO:0043226 organelle; GO:0043227 membrane-bounded organelle; GO:0043229 intracellular organelle; GO:0043231 intracellular membrane-bounded organelle; GO:0043233 organelle lumen; GO:0044422 organelle part; GO:…	GO:0003824 catalytic activity; GO:0004175 endopeptidase activity; GO:0004197 cysteine-type endopeptidase activity; GO:0005488 binding; GO:0005515 protein binding; GO:0008233 peptidase activity; GO:0008234 cysteine-type peptidase activity; GO:0016787 hydrolase activity; GO:0042802 identical protein binding; GO:0070011 peptidase activity, acting on L-amino acid peptides; GO:0097153 cysteine-type en…	K04396	CASP6; caspase 6 [EC:3.4.22.59]	dre04210 Apoptosis - Danio rerio (zebrafish);	PF00656	Caspase domain	D	KOG3573	Caspase, apoptotic cysteine protease
F02_transcript_20645	tripartite motif-containing protein 35-like; K12012 tripartite motif-containing protein 35 (A)	27.294	16.9	3	7	1	0.887	0.89	0.856	1.127	1.091	1.183	1.292	0.00065902	cytoplasm,nucleus	GO:0002376 immune system process; GO:0006950 response to stress; GO:0006952 defense response; GO:0006955 immune response; GO:0007346 regulation of mitotic cell cycle; GO:0008285 negative regulation of cell proliferation; GO:0010941 regulation of cell death; GO:0010942 positive regulation of cell death; GO:0040012 regulation of locomotion; GO:0040013 negative regulation of locomotion; GO:0042127 r…	GO:0005622 intracellular; GO:0005623 cell; GO:0005634 nucleus; GO:0005737 cytoplasm; GO:0043226 organelle; GO:0043227 membrane-bounded organelle; GO:0043229 intracellular organelle; GO:0043231 intracellular membrane-bounded organelle; GO:0044424 intracellular part; GO:0044464 cell part;							O	KOG2177	Predicted E3 ubiquitin ligase
F02_transcript_19164	interferon-induced guanylate-binding protein 1 [Sus scrofa]	39.014	16.9	5	5	4	0.91	0.831	0.893	1.138	1.157	1.104	1.29	0.00116243	cytoplasm	GO:0001562 response to protozoan; GO:0001816 cytokine production; GO:0001817 regulation of cytokine production; GO:0001818 negative regulation of cytokine production; GO:0001819 positive regulation of cytokine production; GO:0001932 regulation of protein phosphorylation; GO:0001933 negative regulation of protein phosphorylation; GO:0002237 response to molecule of bacterial origin; GO:0002376 immu…	GO:0005576 extracellular region; GO:0005622 intracellular; GO:0005623 cell; GO:0005634 nucleus; GO:0005654 nucleoplasm; GO:0005737 cytoplasm; GO:0005794 Golgi apparatus; GO:0005829 cytosol; GO:0005856 cytoskeleton; GO:0012505 endomembrane system; GO:0012506 vesicle membrane; GO:0015629 actin cytoskeleton; GO:0016020 membrane; GO:0018995 host; GO:0020003 symbiont-containing vacuole; GO:0020005 sym…	GO:0000166 nucleotide binding; GO:0001882 nucleoside binding; GO:0001883 purine nucleoside binding; GO:0003779 actin binding; GO:0003824 catalytic activity; GO:0003924 GTPase activity; GO:0005488 binding; GO:0005515 protein binding; GO:0005525 GTP binding; GO:0008092 cytoskeletal protein binding; GO:0016462 pyrophosphatase activity; GO:0016787 hydrolase activity; GO:0016817 hydrolase activity, ac…	K20899	GBP1_3_4_7; guanylate-binding protein 1/3/4/7	dre04621 NOD-like receptor signaling pathway - Danio rerio (zebrafish);	PF02263; PF02841	Guanylate-binding protein, N-terminal domain; Guanylate-binding protein, C-terminal domain	S	KOG2037	Guanylate-binding protein
F02_transcript_12711	ppp1r9ba; protein phosphatase 1, regulatory subunit 9Ba; K17551 neurabin (A)	94.054	2.3	1	1	1		0.839		1.045		1.118	1.289		nucleus	GO:0007275 multicellular organism development; GO:0007399 nervous system development; GO:0007416 synapse assembly; GO:0009987 cellular process; GO:0016043 cellular component organization; GO:0022607 cellular component assembly; GO:0032501 multicellular organismal process; GO:0032502 developmental process; GO:0044085 cellular component biogenesis; GO:0044087 regulation of cellular component biogen…	GO:0001725 stress fiber; GO:0005622 intracellular; GO:0005623 cell; GO:0005737 cytoplasm; GO:0005856 cytoskeleton; GO:0005886 plasma membrane; GO:0005938 cell cortex; GO:0015629 actin cytoskeleton; GO:0016020 membrane; GO:0030863 cortical cytoskeleton; GO:0030864 cortical actin cytoskeleton; GO:0032432 actin filament bundle; GO:0036062 presynaptic periactive zone; GO:0042641 actomyosin; GO:004273…	GO:0003779 actin binding; GO:0005102 receptor binding; GO:0005488 binding; GO:0005515 protein binding; GO:0008092 cytoskeletal protein binding; GO:0042043 neurexin family protein binding; GO:0044877 macromolecular complex binding; GO:0051015 actin filament binding;	K17551	PPP1R9; neurabin		PF00595	PDZ domain (Also known as DHR or GLGF)	T	KOG1945	Protein phosphatase 1 binding protein spinophilin/neurabin II
F02_transcript_11111	E3 ubiquitin-protein ligase TRIM21 [Sus scrofa]	52.558	19	8	14	1	0.812	0.88	0.948	0.904	1.202	1.295	1.288	0.108463	nucleus	GO:0002376 immune system process; GO:0006950 response to stress; GO:0006952 defense response; GO:0006955 immune response; GO:0007346 regulation of mitotic cell cycle; GO:0008285 negative regulation of cell proliferation; GO:0010941 regulation of cell death; GO:0010942 positive regulation of cell death; GO:0040012 regulation of locomotion; GO:0040013 negative regulation of locomotion; GO:0042127 r…	GO:0005622 intracellular; GO:0005623 cell; GO:0005634 nucleus; GO:0005737 cytoplasm; GO:0043226 organelle; GO:0043227 membrane-bounded organelle; GO:0043229 intracellular organelle; GO:0043231 intracellular membrane-bounded organelle; GO:0044424 intracellular part; GO:0044464 cell part;					PF00097; PF00643	Zinc finger, C3HC4 type (RING finger); B-box zinc finger	O	KOG2177	Predicted E3 ubiquitin ligase
F02_transcript_17543	argininosuccinate lyase-like; K01755 argininosuccinate lyase [EC:4.3.2.1] (A)	51.927	54.8	25	103	25	0.903	0.876	0.871	1.158	1.157	1.094	1.286	0.00032343	nucleus	GO:0000050 urea cycle; GO:0000053 argininosuccinate metabolic process; GO:0001655 urogenital system development; GO:0001666 response to hypoxia; GO:0001822 kidney development; GO:0001889 liver development; GO:0002237 response to molecule of bacterial origin; GO:0002376 immune system process; GO:0006082 organic acid metabolic process; GO:0006520 cellular amino acid metabolic process; GO:0006525 ar…	GO:0005622 intracellular; GO:0005623 cell; GO:0005634 nucleus; GO:0005737 cytoplasm; GO:0005739 mitochondrion; GO:0005740 mitochondrial envelope; GO:0005741 mitochondrial outer membrane; GO:0005783 endoplasmic reticulum; GO:0005829 cytosol; GO:0012505 endomembrane system; GO:0016020 membrane; GO:0019867 outer membrane; GO:0031090 organelle membrane; GO:0031966 mitochondrial membrane; GO:0031967 o…	GO:0003824 catalytic activity; GO:0004056 argininosuccinate lyase activity; GO:0005198 structural molecule activity; GO:0005212 structural constituent of eye lens; GO:0005488 binding; GO:0005515 protein binding; GO:0016829 lyase activity; GO:0016840 carbon-nitrogen lyase activity; GO:0016842 amidine-lyase activity; GO:0042802 identical protein binding;	K01755	argH, ASL; argininosuccinate lyase [EC:4.3.2.1]	dre00220 Arginine biosynthesis - Danio rerio (zebrafish); dre00250 Alanine, aspartate and glutamate metabolism - Danio rerio (zebrafish); dre01100 Metabolic pathways - Danio rerio (zebrafish); dre01230 Biosynthesis of amino acids - Danio rerio (zebrafish);	PF00206	Lyase	E	KOG1316	Argininosuccinate lyase
F02_transcript_8623	5'-nucleotidase domain-containing protein 1-like [Stylophora pistillata]	51.06	1.6	1	1	1	0.888	0.892	0.859	1.155	1.12	1.12	1.286	8.4107e-05	nucleus	GO:0006793 phosphorus metabolic process; GO:0006796 phosphate-containing compound metabolic process; GO:0008152 metabolic process; GO:0009987 cellular process; GO:0016311 dephosphorylation; GO:0044237 cellular metabolic process;		GO:0003824 catalytic activity; GO:0008252 nucleotidase activity; GO:0008253 5'-nucleotidase activity; GO:0016787 hydrolase activity; GO:0016788 hydrolase activity, acting on ester bonds; GO:0016791 phosphatase activity; GO:0042578 phosphoric ester hydrolase activity;						F	KOG2469	IMP-GMP specific 5'-nucleotidase
F02_transcript_8788	yap1, YAP65, cb194, sb:cb194, si:ch211-181p1.5, si:dkey-3b8.3, wu:fc18c04, zgc:158380; Yes-associated protein 1; K16687 protein yorkie (A)	48.551	9.9	3	4	3	0.904	0.802	0.937	1.064	1.207	1.126	1.285	0.0133578	nucleus	GO:0000003 reproduction; GO:0000902 cell morphogenesis; GO:0001101 response to acid chemical; GO:0001501 skeletal system development; GO:0001568 blood vessel development; GO:0001570 vasculogenesis; GO:0001654 eye development; GO:0001655 urogenital system development; GO:0001667 ameboidal-type cell migration; GO:0001708 cell fate specification; GO:0001763 morphogenesis of a branching structure; GO…	GO:0000785 chromatin; GO:0005622 intracellular; GO:0005623 cell; GO:0005634 nucleus; GO:0005654 nucleoplasm; GO:0005667 transcription factor complex; GO:0005694 chromosome; GO:0005737 cytoplasm; GO:0005829 cytosol; GO:0016020 membrane; GO:0031974 membrane-enclosed lumen; GO:0031981 nuclear lumen; GO:0032991 macromolecular complex; GO:0043226 organelle; GO:0043227 membrane-bounded organelle; GO:00…	GO:0000976 transcription regulatory region sequence-specific DNA binding; GO:0000977 RNA polymerase II regulatory region sequence-specific DNA binding; GO:0000978 RNA polymerase II core promoter proximal region sequence-specific DNA binding; GO:0000987 core promoter proximal region sequence-specific DNA binding; GO:0000988 transcription factor activity, protein binding; GO:0000989 transcription f…	K16687	YAP1, Yki; transcriptional coactivator YAP1		PF00397	WW domain	K	KOG0940	Ubiquitin protein ligase RSP5/NEDD4
F02_transcript_1602	MORC family CW-type zinc finger protein 3-like [Stylophora pistillata]	129.43	8.9	3	3	3	0.856	0.884	0.953	1.216	1.091	1.146	1.282	0.0051009	nucleus							PF13589; PF07496	Histidine kinase-, DNA gyrase B-, and HSP90-like ATPase; CW-type Zinc Finger	D	KOG1845	MORC family ATPases
F02_transcript_10010	serine/threonine-protein kinase STK11-like; K07298 serine/threonine-protein kinase 11 (A)	48.481	3.3	1	1	1	0.878	0.934	0.829	1.279	0.967	1.14	1.282	0.050924	nucleus	GO:0000003 reproduction; GO:0000226 microtubule cytoskeleton organization; GO:0000278 mitotic cell cycle; GO:0000578 embryonic axis specification; GO:0000902 cell morphogenesis; GO:0000904 cell morphogenesis involved in differentiation; GO:0000910 cytokinesis; GO:0001558 regulation of cell growth; GO:0001700 embryonic development via the syncytial blastoderm; GO:0001709 cell fate determination; G…	GO:0005622 intracellular; GO:0005623 cell; GO:0005634 nucleus; GO:0005654 nucleoplasm; GO:0005737 cytoplasm; GO:0005739 mitochondrion; GO:0005768 endosome; GO:0005829 cytosol; GO:0005938 cell cortex; GO:0012505 endomembrane system; GO:0016020 membrane; GO:0031410 cytoplasmic vesicle; GO:0031974 membrane-enclosed lumen; GO:0031981 nuclear lumen; GO:0031982 vesicle; GO:0032991 macromolecular comple…	GO:0000166 nucleotide binding; GO:0000287 magnesium ion binding; GO:0002039 p53 binding; GO:0003824 catalytic activity; GO:0004672 protein kinase activity; GO:0004674 protein serine/threonine kinase activity; GO:0005488 binding; GO:0005515 protein binding; GO:0005516 calmodulin binding; GO:0005524 ATP binding; GO:0008047 enzyme activator activity; GO:0008144 drug binding; GO:0016301 kinase activi…	K07298	STK11, LKB1; serine/threonine-protein kinase 11 [EC:2.7.11.1]	dre04068 FoxO signaling pathway - Danio rerio (zebrafish); dre04140 Autophagy - animal - Danio rerio (zebrafish); dre04150 mTOR signaling pathway - Danio rerio (zebrafish); dre04530 Tight junction - Danio rerio (zebrafish); dre04920 Adipocytokine signaling pathway - Danio rerio (zebrafish);	PF00069	Protein kinase domain	T	KOG0583	Serine/threonine protein kinase
F02_transcript_7831	SAFB-like transcription modulator [Zootermopsis nevadensis]	98.33	1.8	2	2	2	0.886	0.894	0.868	1.115	1.278	0.998	1.281	0.078203	nucleus	GO:0000003 reproduction; GO:0003006 developmental process involved in reproduction; GO:0006325 chromatin organization; GO:0006355 regulation of transcription, DNA-templated; GO:0006357 regulation of transcription from RNA polymerase II promoter; GO:0006996 organelle organization; GO:0007154 cell communication; GO:0007165 signal transduction; GO:0007275 multicellular organism development; GO:00075…	GO:0005622 intracellular; GO:0005623 cell; GO:0005634 nucleus; GO:0005654 nucleoplasm; GO:0005737 cytoplasm; GO:0016604 nuclear body; GO:0031974 membrane-enclosed lumen; GO:0031981 nuclear lumen; GO:0043226 organelle; GO:0043227 membrane-bounded organelle; GO:0043229 intracellular organelle; GO:0043231 intracellular membrane-bounded organelle; GO:0043233 organelle lumen; GO:0044422 organelle part…	GO:0000976 transcription regulatory region sequence-specific DNA binding; GO:0000977 RNA polymerase II regulatory region sequence-specific DNA binding; GO:0000978 RNA polymerase II core promoter proximal region sequence-specific DNA binding; GO:0000987 core promoter proximal region sequence-specific DNA binding; GO:0001012 RNA polymerase II regulatory region DNA binding; GO:0001067 regulatory reg…				PF00076	RNA recognition motif. (a.k.a. RRM, RBD, or RNP domain)	A	KOG4661	Hsp27-ERE-TATA-binding protein/Scaffold attachment factor (SAF-B)
F02_transcript_29441	proteasome subunit beta type-9-like; K02741 20S proteasome subunit beta 9 [EC:3.4.25.1] (A)	20.804	23.6	4	7	1	0.854	0.971	0.819	1.179	1.142	1.067	1.281	0.0133976	cytoplasm	GO:0001889 liver development; GO:0002376 immune system process; GO:0002520 immune system development; GO:0003008 system process; GO:0003012 muscle system process; GO:0006464 cellular protein modification process; GO:0006508 proteolysis; GO:0006511 ubiquitin-dependent protein catabolic process; GO:0006807 nitrogen compound metabolic process; GO:0007275 multicellular organism development; GO:000815…	GO:0000502 proteasome complex; GO:0005622 intracellular; GO:0005623 cell; GO:0005634 nucleus; GO:0005654 nucleoplasm; GO:0005737 cytoplasm; GO:0005829 cytosol; GO:0005839 proteasome core complex; GO:0019774 proteasome core complex, beta-subunit complex; GO:0031974 membrane-enclosed lumen; GO:0031981 nuclear lumen; GO:0032991 macromolecular complex; GO:0043226 organelle; GO:0043227 membrane-bounde…	GO:0003824 catalytic activity; GO:0004175 endopeptidase activity; GO:0005488 binding; GO:0008233 peptidase activity; GO:0016787 hydrolase activity; GO:0044877 macromolecular complex binding; GO:0070011 peptidase activity, acting on L-amino acid peptides; GO:0070628 proteasome binding;	K02741	PSMB9, LMP2; 20S proteasome subunit beta 9 [EC:3.4.25.1]	dre03050 Proteasome - Danio rerio (zebrafish);	PF00227	Proteasome subunit	O	KOG0174	20S proteasome, regulatory subunit beta type PSMB6/PSMB9/PRE3
F02_transcript_8629	cndp1, cn1, cpgl2; carnosine dipeptidase 1 (metallopeptidase M20 family); K05604 beta-Ala-His dipeptidase [EC:3.4.13.20] (A)	55.097	30.9	12	20	12	0.893	0.908	0.835	1.109	1.127	1.138	1.28	0.000757	mitochondria	GO:0006508 proteolysis; GO:0006807 nitrogen compound metabolic process; GO:0008152 metabolic process; GO:0019222 regulation of metabolic process; GO:0019538 protein metabolic process; GO:0031323 regulation of cellular metabolic process; GO:0032268 regulation of cellular protein metabolic process; GO:0043170 macromolecule metabolic process; GO:0044238 primary metabolic process; GO:0050789 regulati…	GO:0005576 extracellular region; GO:0005622 intracellular; GO:0005623 cell; GO:0005737 cytoplasm; GO:0005829 cytosol; GO:0044424 intracellular part; GO:0044444 cytoplasmic part; GO:0044464 cell part;	GO:0003824 catalytic activity; GO:0008233 peptidase activity; GO:0008238 exopeptidase activity; GO:0016787 hydrolase activity; GO:0016805 dipeptidase activity; GO:0070011 peptidase activity, acting on L-amino acid peptides;				PF07687	Peptidase dimerisation domain	E	KOG2276	Metalloexopeptidases
F02_transcript_5501	1-phosphatidylinositol 4,5-bisphosphate phosphodiesterase beta-1-like; K05858 phosphatidylinositol phospholipase C, beta [EC:3.1.4.11] (A)	31.034	4.4	1	1	1	0.868	0.926	0.857	1.11	1.246	1.031	1.278	0.0156639	mitochondria	GO:0000003 reproduction; GO:0000086 G2/M transition of mitotic cell cycle; GO:0000278 mitotic cell cycle; GO:0001101 response to acid chemical; GO:0001556 oocyte maturation; GO:0001775 cell activation; GO:0001817 regulation of cytokine production; GO:0001819 positive regulation of cytokine production; GO:0001932 regulation of protein phosphorylation; GO:0001934 positive regulation of protein phos…	GO:0000228 nuclear chromosome; GO:0000785 chromatin; GO:0000790 nuclear chromatin; GO:0005622 intracellular; GO:0005623 cell; GO:0005634 nucleus; GO:0005654 nucleoplasm; GO:0005694 chromosome; GO:0005737 cytoplasm; GO:0005829 cytosol; GO:0005886 plasma membrane; GO:0016020 membrane; GO:0016604 nuclear body; GO:0016607 nuclear speck; GO:0031974 membrane-enclosed lumen; GO:0031981 nuclear lumen; GO…	GO:0003824 catalytic activity; GO:0004435 phosphatidylinositol phospholipase C activity; GO:0004620 phospholipase activity; GO:0004629 phospholipase C activity; GO:0005096 GTPase activator activity; GO:0005488 binding; GO:0005509 calcium ion binding; GO:0005515 protein binding; GO:0005516 calmodulin binding; GO:0005521 lamin binding; GO:0005543 phospholipid binding; GO:0005546 phosphatidylinosito…				PF09279	Phosphoinositide-specific phospholipase C, efhand-like	I	KOG1265	Phospholipase C
F02_transcript_9841	transcription factor AP-2-alpha-like; K09176 transcription factor AP-2 alpha/beta (A)	45.881	8.9	2	2	2	0.861	0.652	1.135	1.13	1.09	1.164	1.278	0.23544	nucleus	GO:0000003 reproduction; GO:0000122 negative regulation of transcription from RNA polymerase II promoter; GO:0001101 response to acid chemical; GO:0001501 skeletal system development; GO:0001654 eye development; GO:0001655 urogenital system development; GO:0001656 metanephros development; GO:0001822 kidney development; GO:0001838 embryonic epithelial tube formation; GO:0001841 neural tube formati…	GO:0005622 intracellular; GO:0005623 cell; GO:0005634 nucleus; GO:0005654 nucleoplasm; GO:0005667 transcription factor complex; GO:0005737 cytoplasm; GO:0005794 Golgi apparatus; GO:0005813 centrosome; GO:0005815 microtubule organizing center; GO:0005829 cytosol; GO:0005856 cytoskeleton; GO:0012505 endomembrane system; GO:0015630 microtubule cytoskeleton; GO:0031974 membrane-enclosed lumen; GO:003…	GO:0000976 transcription regulatory region sequence-specific DNA binding; GO:0000977 RNA polymerase II regulatory region sequence-specific DNA binding; GO:0000978 RNA polymerase II core promoter proximal region sequence-specific DNA binding; GO:0000979 RNA polymerase II core promoter sequence-specific DNA binding; GO:0000980 RNA polymerase II distal enhancer sequence-specific DNA binding; GO:0000…	K09176	TFAP2A_B; transcription factor AP-2 alpha/beta				K	KOG3811	Transcription factor AP-2
F02_transcript_19772	Uncharacterized protein	37.406	3.1	1	2	1	0.932	0.839	0.88	1.264	1.053	1.063	1.275	0.022702	mitochondria	GO:0002576 platelet degranulation; GO:0006810 transport; GO:0006887 exocytosis; GO:0009987 cellular process; GO:0016192 vesicle-mediated transport; GO:0032940 secretion by cell; GO:0045055 regulated exocytosis; GO:0046903 secretion; GO:0051179 localization; GO:0051234 establishment of localization;	GO:0005576 extracellular region; GO:0005622 intracellular; GO:0005623 cell; GO:0005737 cytoplasm; GO:0005739 mitochondrion; GO:0005740 mitochondrial envelope; GO:0005743 mitochondrial inner membrane; GO:0012505 endomembrane system; GO:0016020 membrane; GO:0016021 integral component of membrane; GO:0019866 organelle inner membrane; GO:0030141 secretory granule; GO:0031090 organelle membrane; GO:00…							S	KOG4798	Uncharacterized conserved protein
F02_transcript_27808	ferritin, heavy subunit-like; K00522 ferritin heavy chain [EC:1.16.3.2] (A)	20.715	54.8	9	18	9	0.916	0.87	0.879	1.137	1.132	1.128	1.275	0.0042606	cytoplasm,nucleus	GO:0000041 transition metal ion transport; GO:0001775 cell activation; GO:0002252 immune effector process; GO:0002263 cell activation involved in immune response; GO:0002274 myeloid leukocyte activation; GO:0002275 myeloid cell activation involved in immune response; GO:0002283 neutrophil activation involved in immune response; GO:0002366 leukocyte activation involved in immune response; GO:00023…	GO:0000323 lytic vacuole; GO:0005576 extracellular region; GO:0005622 intracellular; GO:0005623 cell; GO:0005737 cytoplasm; GO:0005764 lysosome; GO:0005767 secondary lysosome; GO:0005773 vacuole; GO:0005776 autophagosome; GO:0005829 cytosol; GO:0008043 intracellular ferritin complex; GO:0012505 endomembrane system; GO:0030139 endocytic vesicle; GO:0030141 secretory granule; GO:0031410 cytoplasmic…	GO:0005488 binding; GO:0005506 iron ion binding; GO:0043167 ion binding; GO:0043169 cation binding; GO:0046872 metal ion binding; GO:0046914 transition metal ion binding;	K00522	FTH1; ferritin heavy chain [EC:1.16.3.2]	dre04216 Ferroptosis - Danio rerio (zebrafish); dre04217 Necroptosis - Danio rerio (zebrafish);	PF00210	Ferritin-like domain	P	KOG2332	Ferritin
F02_transcript_905	glutamine--fructose-6-phosphate aminotransferase [isomerizing] 1-like; K00820 glucosamine--fructose-6-phosphate aminotransferase (isomerizing) [EC:2.6.1.16] (A)	46.749	49	17	34	13	0.867	0.877	0.892	1.098	1.117	1.143	1.274	7.5416e-05	cytoplasm	GO:0005979 regulation of glycogen biosynthetic process; GO:0006002 fructose 6-phosphate metabolic process; GO:0006040 amino sugar metabolic process; GO:0006041 glucosamine metabolic process; GO:0006042 glucosamine biosynthetic process; GO:0006047 UDP-N-acetylglucosamine metabolic process; GO:0006048 UDP-N-acetylglucosamine biosynthetic process; GO:0006091 generation of precursor metabolites and e…	GO:0005622 intracellular; GO:0005623 cell; GO:0005737 cytoplasm; GO:0005829 cytosol; GO:0044424 intracellular part; GO:0044444 cytoplasmic part; GO:0044464 cell part;	GO:0003824 catalytic activity; GO:0004360 glutamine-fructose-6-phosphate transaminase (isomerizing) activity; GO:0005488 binding; GO:0005515 protein binding; GO:0008483 transaminase activity; GO:0016597 amino acid binding; GO:0016740 transferase activity; GO:0016769 transferase activity, transferring nitrogenous groups; GO:0030246 carbohydrate binding; GO:0031406 carboxylic acid binding; GO:00360…	K00820	glmS, GFPT; glucosamine---fructose-6-phosphate aminotransferase (isomerizing) [EC:2.6.1.16]	dre00250 Alanine, aspartate and glutamate metabolism - Danio rerio (zebrafish); dre00520 Amino sugar and nucleotide sugar metabolism - Danio rerio (zebrafish); dre01100 Metabolic pathways - Danio rerio (zebrafish);	PF13522	Glutamine amidotransferase domain	M	KOG1268	Glucosamine 6-phosphate synthetases, contain amidotransferase and phosphosugar isomerase domains
F02_transcript_1618	carkd, zgc:171429; carbohydrate kinase domain containing (EC:4.2.1.93); K17757 ATP-dependent NAD(P)H-hydrate dehydratase [EC:4.2.1.93] (A)	32.751	23.2	6	8	6	0.875	0.885	0.922	1.169	1.133	1.116	1.274	0.00031911	cytoplasm	GO:0006139 nucleobase-containing compound metabolic process; GO:0006725 cellular aromatic compound metabolic process; GO:0006732 coenzyme metabolic process; GO:0006733 oxidoreduction coenzyme metabolic process; GO:0006753 nucleoside phosphate metabolic process; GO:0006793 phosphorus metabolic process; GO:0006796 phosphate-containing compound metabolic process; GO:0006807 nitrogen compound metabol…	GO:0005622 intracellular; GO:0005623 cell; GO:0005737 cytoplasm; GO:0005739 mitochondrion; GO:0005759 mitochondrial matrix; GO:0005783 endoplasmic reticulum; GO:0005829 cytosol; GO:0012505 endomembrane system; GO:0031974 membrane-enclosed lumen; GO:0043226 organelle; GO:0043227 membrane-bounded organelle; GO:0043229 intracellular organelle; GO:0043231 intracellular membrane-bounded organelle; GO:…	GO:0003824 catalytic activity; GO:0016829 lyase activity; GO:0016835 carbon-oxygen lyase activity; GO:0016836 hydro-lyase activity; GO:0047453 ATP-dependent NAD(P)H-hydrate dehydratase activity;	K17757	CARKD; ATP-dependent NAD(P)H-hydrate dehydratase [EC:4.2.1.93]				G	KOG3974	Predicted sugar kinase
F02_transcript_21384	secernin-3-like; K14358 secernin (A)	47.55	15.5	4	4	4	0.917	0.772	0.968	0.986	1.245	1.154	1.274	0.066715	cytoplasm	GO:0006810 transport; GO:0006887 exocytosis; GO:0009987 cellular process; GO:0016192 vesicle-mediated transport; GO:0032940 secretion by cell; GO:0046903 secretion; GO:0051179 localization; GO:0051234 establishment of localization;			K14358	SCRN; secernin
F02_transcript_22415	nceh1; neutral cholesterol ester hydrolase 1; K14349 neutral cholesterol ester hydrolase 1 [EC:3.1.1.-] (A)	45.486	27.8	9	11	9	0.919	0.828	0.86	1.115	1.162	1.041	1.273	0.0055043	extracellular	GO:0006464 cellular protein modification process; GO:0006470 protein dephosphorylation; GO:0006793 phosphorus metabolic process; GO:0006796 phosphate-containing compound metabolic process; GO:0006805 xenobiotic metabolic process; GO:0006807 nitrogen compound metabolic process; GO:0007154 cell communication; GO:0007165 signal transduction; GO:0007166 cell surface receptor signaling pathway; GO:000…	GO:0005622 intracellular; GO:0005623 cell; GO:0005737 cytoplasm; GO:0005783 endoplasmic reticulum; GO:0005789 endoplasmic reticulum membrane; GO:0012505 endomembrane system; GO:0016020 membrane; GO:0031984 organelle subcompartment; GO:0042175 nuclear outer membrane-endoplasmic reticulum membrane network; GO:0043226 organelle; GO:0043227 membrane-bounded organelle; GO:0043229 intracellular organel…	GO:0003824 catalytic activity; GO:0004771 sterol esterase activity; GO:0005488 binding; GO:0016298 lipase activity; GO:0016787 hydrolase activity; GO:0016788 hydrolase activity, acting on ester bonds; GO:0017171 serine hydrolase activity; GO:0042301 phosphate ion binding; GO:0043167 ion binding; GO:0043168 anion binding; GO:0052689 carboxylic ester hydrolase activity;	K14349	NCEH1, AADACL1; neutral cholesterol ester hydrolase 1 [EC:3.1.1.-]		PF07859	alpha/beta hydrolase fold	V	KOG1515	Arylacetamide deacetylase
F02_transcript_11250	rars, wu:fa96g09, zgc:56050, zgc:86730; arginyl-tRNA synthetase (EC:6.1.1.19); K01887 arginyl-tRNA synthetase [EC:6.1.1.19] (A)	75.483	46.8	31	55	31	0.885	0.899	0.863	1.11	1.155	1.101	1.272	0.00022234	cytoplasm	GO:0000122 negative regulation of transcription from RNA polymerase II promoter; GO:0006082 organic acid metabolic process; GO:0006139 nucleobase-containing compound metabolic process; GO:0006355 regulation of transcription, DNA-templated; GO:0006357 regulation of transcription from RNA polymerase II promoter; GO:0006399 tRNA metabolic process; GO:0006412 translation; GO:0006418 tRNA aminoacylati…	GO:0005622 intracellular; GO:0005623 cell; GO:0005634 nucleus; GO:0005654 nucleoplasm; GO:0005737 cytoplasm; GO:0005829 cytosol; GO:0017101 aminoacyl-tRNA synthetase multienzyme complex; GO:0031974 membrane-enclosed lumen; GO:0031981 nuclear lumen; GO:0032991 macromolecular complex; GO:0043226 organelle; GO:0043227 membrane-bounded organelle; GO:0043229 intracellular organelle; GO:0043231 intrace…	GO:0000049 tRNA binding; GO:0000166 nucleotide binding; GO:0003676 nucleic acid binding; GO:0003723 RNA binding; GO:0003824 catalytic activity; GO:0004812 aminoacyl-tRNA ligase activity; GO:0004814 arginine-tRNA ligase activity; GO:0005488 binding; GO:0005524 ATP binding; GO:0008144 drug binding; GO:0016597 amino acid binding; GO:0016874 ligase activity; GO:0016875 ligase activity, forming carbon…	K01887	RARS, argS; arginyl-tRNA synthetase [EC:6.1.1.19]	dre00970 Aminoacyl-tRNA biosynthesis - Danio rerio (zebrafish);	PF03485; PF05746	Arginyl tRNA synthetase N terminal domain; DALR anticodon binding domain	J	KOG4426	Arginyl-tRNA synthetase
F02_transcript_9695	dehydrogenase/reductase SDR family member 12-like; K11168 dehydrogenase/reductase SDR family member 12 [EC:1.1.-.-] (A)	35.994	8.7	3	4	3	0.909	0.834	0.915	1.082	1.156	1.142	1.272	0.0026362	cytoplasm				K11168	DHRS12; dehydrogenase/reductase SDR family member 12 [EC:1.1.-.-]		PF00106	short chain dehydrogenase	Q	KOG1208	Dehydrogenases with different specificities (related to short-chain alcohol dehydrogenases)
F02_transcript_1407	Tubulin-specific chaperone D [Stylophora pistillata]	42.706	3.2	1	2	1	0.853	0.855	0.947	1.09	1.102	1.186	1.272	0.0051563	cytoplasm,nucleus	GO:0000226 microtubule cytoskeleton organization; GO:0000278 mitotic cell cycle; GO:0000902 cell morphogenesis; GO:0000904 cell morphogenesis involved in differentiation; GO:0006457 protein folding; GO:0006996 organelle organization; GO:0007010 cytoskeleton organization; GO:0007017 microtubule-based process; GO:0007021 tubulin complex assembly; GO:0007023 post-chaperonin tubulin folding pathway; …	GO:0005622 intracellular; GO:0005623 cell; GO:0005737 cytoplasm; GO:0005813 centrosome; GO:0005815 microtubule organizing center; GO:0005829 cytosol; GO:0005856 cytoskeleton; GO:0005874 microtubule; GO:0005886 plasma membrane; GO:0005911 cell-cell junction; GO:0005912 adherens junction; GO:0005923 bicellular tight junction; GO:0015630 microtubule cytoskeleton; GO:0016020 membrane; GO:0016328 late…	GO:0005096 GTPase activator activity; GO:0005488 binding; GO:0005515 protein binding; GO:0008047 enzyme activator activity; GO:0008092 cytoskeletal protein binding; GO:0015631 tubulin binding; GO:0030234 enzyme regulator activity; GO:0030695 GTPase regulator activity; GO:0048487 beta-tubulin binding; GO:0051087 chaperone binding; GO:0060589 nucleoside-triphosphatase regulator activity; GO:0098772…	K21767	TBCD; tubulin-specific chaperone D				O	KOG1943	Beta-tubulin folding cofactor D
F02_transcript_6521	Uncharacterized protein	54.654	4.9	2	3	2	0.896	0.83	0.931	1.102	1.154	1.123	1.272	0.0026603	mitochondria
F02_transcript_22214	N-acetylglucosamine-6-sulfatase-like; K01137 N-acetylglucosamine-6-sulfatase [EC:3.1.6.14] (A)	51.88	16.8	8	8	8	0.908	0.857	0.848	1.081	1.089	1.151	1.271	0.00117673	mitochondria				K01137	GNS; N-acetylglucosamine-6-sulfatase [EC:3.1.6.14]	dre00531 Glycosaminoglycan degradation - Danio rerio (zebrafish); dre01100 Metabolic pathways - Danio rerio (zebrafish); dre04142 Lysosome - Danio rerio (zebrafish);			G	KOG3731	Sulfatases
F02_transcript_18934	lta4h, zgc:85809; leukotriene A4 hydrolase (EC:3.3.2.6); K01254 leukotriene-A4 hydrolase [EC:3.3.2.6] (A)	69.222	27.3	14	22	14	0.906	0.9	0.846	1.125	1.14	1.107	1.271	0.00050282	cytoplasm	GO:0001676 long-chain fatty acid metabolic process; GO:0001775 cell activation; GO:0002252 immune effector process; GO:0002263 cell activation involved in immune response; GO:0002274 myeloid leukocyte activation; GO:0002275 myeloid cell activation involved in immune response; GO:0002283 neutrophil activation involved in immune response; GO:0002366 leukocyte activation involved in immune response;…	GO:0005576 extracellular region; GO:0005622 intracellular; GO:0005623 cell; GO:0005634 nucleus; GO:0005654 nucleoplasm; GO:0005737 cytoplasm; GO:0005829 cytosol; GO:0012505 endomembrane system; GO:0030141 secretory granule; GO:0031410 cytoplasmic vesicle; GO:0031974 membrane-enclosed lumen; GO:0031981 nuclear lumen; GO:0031982 vesicle; GO:0043226 organelle; GO:0043227 membrane-bounded organelle; …	GO:0003824 catalytic activity; GO:0004177 aminopeptidase activity; GO:0004301 epoxide hydrolase activity; GO:0004463 leukotriene-A4 hydrolase activity; GO:0005488 binding; GO:0008233 peptidase activity; GO:0008235 metalloexopeptidase activity; GO:0008237 metallopeptidase activity; GO:0008238 exopeptidase activity; GO:0008270 zinc ion binding; GO:0016787 hydrolase activity; GO:0016801 hydrolase ac…	K01254	LTA4H; leukotriene-A4 hydrolase [EC:3.3.2.6]	dre00590 Arachidonic acid metabolism - Danio rerio (zebrafish); dre01100 Metabolic pathways - Danio rerio (zebrafish);	PF01433	Peptidase family M1	EIOV	KOG1047	Bifunctional leukotriene A4 hydrolase/aminopeptidase LTA4H
F02_transcript_27464	CD63 antigen-like; K06497 CD63 antigen (A)	25.4	15.7	5	14	5	0.819	0.897	0.9	1.146	0.996	1.178	1.269	0.0173392	plasma membrane	GO:0001775 cell activation; GO:0002090 regulation of receptor internalization; GO:0002092 positive regulation of receptor internalization; GO:0002252 immune effector process; GO:0002263 cell activation involved in immune response; GO:0002274 myeloid leukocyte activation; GO:0002275 myeloid cell activation involved in immune response; GO:0002283 neutrophil activation involved in immune response; G…	GO:0000323 lytic vacuole; GO:0005576 extracellular region; GO:0005615 extracellular space; GO:0005622 intracellular; GO:0005623 cell; GO:0005737 cytoplasm; GO:0005764 lysosome; GO:0005765 lysosomal membrane; GO:0005766 primary lysosome; GO:0005768 endosome; GO:0005770 late endosome; GO:0005771 multivesicular body; GO:0005773 vacuole; GO:0005774 vacuolar membrane; GO:0005886 plasma membrane; GO:00…	GO:0005488 binding; GO:0044877 macromolecular complex binding;	K06497	CD63, MLA1, TSPAN30; CD63 antigen	dre04142 Lysosome - Danio rerio (zebrafish);			S	KOG3882	Tetraspanin family integral membrane protein
F02_transcript_25912	Uncharacterized protein	16.015	67.4	11	61	11	0.906	0.902	0.852	1.099	1.145	1.13	1.268	0.0005039	extracellular							PF00031	Cystatin domain
F02_transcript_21318	krt8, DreK8, cb186, krt2-8, sb:cb186, wu:fa20h05, wu:fa95h10, wu:fb96c06, zf-K8, zfk8; keratin 8; K07605 type II keratin, basic (A)	59.706	42.5	31	202	13	0.904	0.835	0.896	1.088	1.104	1.15	1.268	0.00138143	mitochondria	GO:0000003 reproduction; GO:0000902 cell morphogenesis; GO:0000904 cell morphogenesis involved in differentiation; GO:0001101 response to acid chemical; GO:0001701 in utero embryonic development; GO:0001890 placenta development; GO:0001892 embryonic placenta development; GO:0003006 developmental process involved in reproduction; GO:0006915 apoptotic process; GO:0006950 response to stress; GO:0006…	GO:0005622 intracellular; GO:0005623 cell; GO:0005737 cytoplasm; GO:0005829 cytosol; GO:0005856 cytoskeleton; GO:0005882 intermediate filament; GO:0005886 plasma membrane; GO:0005911 cell-cell junction; GO:0016010 dystrophin-associated glycoprotein complex; GO:0016020 membrane; GO:0016327 apicolateral plasma membrane; GO:0030016 myofibril; GO:0030017 sarcomere; GO:0030018 Z disc; GO:0030054 cell …	GO:0005488 binding; GO:0005515 protein binding; GO:0044877 macromolecular complex binding; GO:0097110 scaffold protein binding;	K07605	KRT2; type II keratin, basic
F02_transcript_28852	gpx4b, PHGPxb, cb692, zgc:110018; glutathione peroxidase 4b (EC:1.11.1.12); K05361 phospholipid-hydroperoxide glutathione peroxidase [EC:1.11.1.12] (A)	12.976	57.1	6	9	6	0.794	0.884	0.964	1.162	1.167	1.021	1.268	0.028537	mitochondria	GO:0000003 reproduction; GO:0001676 long-chain fatty acid metabolic process; GO:0006082 organic acid metabolic process; GO:0006325 chromatin organization; GO:0006518 peptide metabolic process; GO:0006575 cellular modified amino acid metabolic process; GO:0006629 lipid metabolic process; GO:0006631 fatty acid metabolic process; GO:0006633 fatty acid biosynthetic process; GO:0006644 phospholipid me…	GO:0005622 intracellular; GO:0005623 cell; GO:0005634 nucleus; GO:0005635 nuclear envelope; GO:0005654 nucleoplasm; GO:0005737 cytoplasm; GO:0005739 mitochondrion; GO:0005829 cytosol; GO:0012505 endomembrane system; GO:0031967 organelle envelope; GO:0031974 membrane-enclosed lumen; GO:0031975 envelope; GO:0031981 nuclear lumen; GO:0032991 macromolecular complex; GO:0043226 organelle; GO:0043227 m…	GO:0003824 catalytic activity; GO:0004601 peroxidase activity; GO:0004602 glutathione peroxidase activity; GO:0005488 binding; GO:0005515 protein binding; GO:0008430 selenium binding; GO:0016209 antioxidant activity; GO:0016491 oxidoreductase activity; GO:0016684 oxidoreductase activity, acting on peroxide as acceptor; GO:0042802 identical protein binding; GO:0047066 phospholipid-hydroperoxide gl…	K05361	GPX4; phospholipid-hydroperoxide glutathione peroxidase [EC:1.11.1.12]	dre00480 Glutathione metabolism - Danio rerio (zebrafish); dre01100 Metabolic pathways - Danio rerio (zebrafish); dre04216 Ferroptosis - Danio rerio (zebrafish);			O	KOG1651	Glutathione peroxidase
F02_transcript_29967	Uncharacterized protein	9.33	44.6	5	54	3	0.915	0.858	0.858	1.061	1.021	1.251	1.267	0.024098	extracellular				K23418			PF00050	Kazal-type serine protease inhibitor domain
F02_transcript_4836	Uncharacterized protein	102.98	44.7	35	78	1	0.985	0.886	0.791	1.336	1.157	0.877	1.266	0.180422	nucleus			GO:0005488 binding; GO:0008270 zinc ion binding; GO:0043167 ion binding; GO:0043169 cation binding; GO:0046872 metal ion binding; GO:0046914 transition metal ion binding;				PF00412	LIM domain	TZ	KOG1704	FOG: LIM domain
F02_transcript_25946	guanine nucleotide exchange factor MSS4 [Mus musculus]	14.478	9	1	2	1	0.801	0.872	0.991	1	1.216	1.157	1.266	0.050183	extracellular	GO:0006810 transport; GO:0006892 post-Golgi vesicle-mediated transport; GO:0009987 cellular process; GO:0016043 cellular component organization; GO:0016192 vesicle-mediated transport; GO:0048193 Golgi vesicle transport; GO:0051179 localization; GO:0051234 establishment of localization; GO:0061024 membrane organization; GO:0061025 membrane fusion; GO:0065007 biological regulation; GO:0065009 regul…	GO:0005622 intracellular; GO:0005623 cell; GO:0005737 cytoplasm; GO:0005829 cytosol; GO:0016020 membrane; GO:0044424 intracellular part; GO:0044444 cytoplasmic part; GO:0044464 cell part;	GO:0005085 guanyl-nucleotide exchange factor activity; GO:0005488 binding; GO:0005515 protein binding; GO:0008270 zinc ion binding; GO:0019899 enzyme binding; GO:0043167 ion binding; GO:0043169 cation binding; GO:0046872 metal ion binding; GO:0046914 transition metal ion binding; GO:0051020 GTPase binding; GO:0098772 molecular function regulator;	K19952	RABIF, MSS4, DSS4; guanine nucleotide exchange factor		PF04421	Mss4 protein	TU	KOG4113	Guanine nucleotide exchange factor
F02_transcript_10252	Synaptophysin-like protein 2 [Zootermopsis nevadensis]	26.265	9.7	2	2	1	0.772	0.89	1	1.238	1.05	1.076	1.264	0.05932	plasma membrane							PF01284	Membrane-associating domain
F02_transcript_20559	glia-derived nexin-like; K16643 glia-derived nexin (A)	43.656	13.6	4	5	4	0.913	0.871	0.886	1.054	1.102	1.218	1.264	0.00664	extracellular	GO:0000003 reproduction; GO:0001558 regulation of cell growth; GO:0002028 regulation of sodium ion transport; GO:0003006 developmental process involved in reproduction; GO:0003008 system process; GO:0006810 transport; GO:0006950 response to stress; GO:0006996 organelle organization; GO:0007162 negative regulation of cell adhesion; GO:0007275 multicellular organism development; GO:0007320 insemina…	GO:0005576 extracellular region; GO:0005615 extracellular space; GO:0005622 intracellular; GO:0005623 cell; GO:0005737 cytoplasm; GO:0005829 cytosol; GO:0005886 plasma membrane; GO:0009897 external side of plasma membrane; GO:0009986 cell surface; GO:0012505 endomembrane system; GO:0016020 membrane; GO:0019897 extrinsic component of plasma membrane; GO:0019898 extrinsic component of membrane; GO:…	GO:0004857 enzyme inhibitor activity; GO:0004866 endopeptidase inhibitor activity; GO:0004867 serine-type endopeptidase inhibitor activity; GO:0005102 receptor binding; GO:0005488 binding; GO:0005515 protein binding; GO:0005539 glycosaminoglycan binding; GO:0008201 heparin binding; GO:0030234 enzyme regulator activity; GO:0030414 peptidase inhibitor activity; GO:0043167 ion binding; GO:0043168 an…	K16643	SERPINE2; glia-derived nexin		PF00079	Serpin (serine protease inhibitor)	V	KOG2392	Serpin
F02_transcript_2622	Uncharacterized protein	72.018	6.9	3	4	3	0.815	0.89	0.963	1.032	1.335	1.003	1.263	0.091661	nucleus				K19607	RPGR; X-linked retinitis pigmentosa GTPase regulator
F02_transcript_20732	apoeb, apoe, cb82, fa96d02, hm:zeh1311, wu:fa03d06, wu:fa96d02, wu:fa97a11, wu:fc95h12, wu:fj54e06; apolipoprotein Eb; K04524 apolipoprotein E (A)	25.906	54.5	14	29	1	0.856	0.935	0.879	1.025	1.27	1.074	1.262	0.030957	cytoplasm	GO:0000302 response to reactive oxygen species; GO:0001101 response to acid chemical; GO:0001523 retinoid metabolic process; GO:0001558 regulation of cell growth; GO:0001568 blood vessel development; GO:0001932 regulation of protein phosphorylation; GO:0001933 negative regulation of protein phosphorylation; GO:0001936 regulation of endothelial cell proliferation; GO:0001937 negative regulation of…	GO:0000323 lytic vacuole; GO:0005576 extracellular region; GO:0005615 extracellular space; GO:0005622 intracellular; GO:0005623 cell; GO:0005634 nucleus; GO:0005635 nuclear envelope; GO:0005737 cytoplasm; GO:0005764 lysosome; GO:0005768 endosome; GO:0005769 early endosome; GO:0005770 late endosome; GO:0005773 vacuole; GO:0005783 endoplasmic reticulum; GO:0005788 endoplasmic reticulum lumen; GO:00…	GO:0001540 beta-amyloid binding; GO:0005102 receptor binding; GO:0005198 structural molecule activity; GO:0005215 transporter activity; GO:0005319 lipid transporter activity; GO:0005488 binding; GO:0005496 steroid binding; GO:0005515 protein binding; GO:0005539 glycosaminoglycan binding; GO:0005543 phospholipid binding; GO:0008047 enzyme activator activity; GO:0008092 cytoskeletal protein binding…	K04524	APOE; apolipoprotein E		PF01442	Apolipoprotein A1/A4/E domain
F02_transcript_9235	finTRIM family, member 82 [Danio rerio]	67.203	1.7	1	1	1	0.922	0.852	0.895	1.124	1.187	1.057	1.262	0.0046599	nucleus							PF13445; PF00643	RING-type zinc-finger, LisH dimerisation motif; B-box zinc finger	O	KOG2177	Predicted E3 ubiquitin ligase
F02_transcript_15640	legumain-like; K01369 legumain [EC:3.4.22.34] (A)	49.024	10.1	3	8	3	0.878	0.921	0.888	1.171	1.104	1.114	1.261	0.00057675	extracellular	GO:0002376 immune system process; GO:0002478 antigen processing and presentation of exogenous peptide antigen; GO:0002495 antigen processing and presentation of peptide antigen via MHC class II; GO:0002504 antigen processing and presentation of peptide or polysaccharide antigen via MHC class II; GO:0002682 regulation of immune system process; GO:0002684 positive regulation of immune system proces…	GO:0000323 lytic vacuole; GO:0005576 extracellular region; GO:0005622 intracellular; GO:0005623 cell; GO:0005737 cytoplasm; GO:0005764 lysosome; GO:0005768 endosome; GO:0005770 late endosome; GO:0005773 vacuole; GO:0005775 vacuolar lumen; GO:0012505 endomembrane system; GO:0031410 cytoplasmic vesicle; GO:0031904 endosome lumen; GO:0031974 membrane-enclosed lumen; GO:0031982 vesicle; GO:0036019 en…	GO:0003824 catalytic activity; GO:0004175 endopeptidase activity; GO:0004197 cysteine-type endopeptidase activity; GO:0008233 peptidase activity; GO:0008234 cysteine-type peptidase activity; GO:0016787 hydrolase activity; GO:0070011 peptidase activity, acting on L-amino acid peptides;	K01369	LGMN; legumain [EC:3.4.22.34]	dre04142 Lysosome - Danio rerio (zebrafish);			O	KOG1348	Asparaginyl peptidases
F02_transcript_21059	pgam1a, pgam1, wu:fb81h05; phosphoglycerate mutase 1a; K01834 2,3-bisphosphoglycerate-dependent phosphoglycerate mutase [EC:5.4.2.11] (A)	29.011	32.7	7	13	3	0.984	0.84	0.844	1.267	0.94	1.153	1.259	0.091941	cytoplasm	GO:0001775 cell activation; GO:0002252 immune effector process; GO:0002263 cell activation involved in immune response; GO:0002274 myeloid leukocyte activation; GO:0002275 myeloid cell activation involved in immune response; GO:0002283 neutrophil activation involved in immune response; GO:0002366 leukocyte activation involved in immune response; GO:0002376 immune system process; GO:0002443 leukoc…	GO:0005576 extracellular region; GO:0005622 intracellular; GO:0005623 cell; GO:0005634 nucleus; GO:0005737 cytoplasm; GO:0005829 cytosol; GO:0005929 cilium; GO:0012505 endomembrane system; GO:0030141 secretory granule; GO:0031410 cytoplasmic vesicle; GO:0031514 motile cilium; GO:0031974 membrane-enclosed lumen; GO:0031982 vesicle; GO:0031983 vesicle lumen; GO:0034774 secretory granule lumen; GO:0…	GO:0003824 catalytic activity; GO:0004619 phosphoglycerate mutase activity; GO:0005488 binding; GO:0005515 protein binding; GO:0016853 isomerase activity; GO:0016866 intramolecular transferase activity; GO:0016868 intramolecular transferase activity, phosphotransferases; GO:0019899 enzyme binding; GO:0019900 kinase binding; GO:0019901 protein kinase binding; GO:0046538 2,3-bisphosphoglycerate-dep…	K01834	PGAM, gpmA; 2,3-bisphosphoglycerate-dependent phosphoglycerate mutase [EC:5.4.2.11]	dre00010 Glycolysis / Gluconeogenesis - Danio rerio (zebrafish); dre00260 Glycine, serine and threonine metabolism - Danio rerio (zebrafish); dre01100 Metabolic pathways - Danio rerio (zebrafish); dre01200 Carbon metabolism - Danio rerio (zebrafish); dre01230 Biosynthesis of amino acids - Danio rerio (zebrafish);	PF00300	Histidine phosphatase superfamily (branch 1)	G	KOG0235	Phosphoglycerate mutase
F02_transcript_13065	protein SSUH2 homolog, partial [Stylophora pistillata]	37.825	16.7	5	5	5	0.955	0.821	0.897	1.107	1.087	1.169	1.258	0.0091997	cytoplasm	GO:0007275 multicellular organism development; GO:0009653 anatomical structure morphogenesis; GO:0009887 animal organ morphogenesis; GO:0032501 multicellular organismal process; GO:0032502 developmental process; GO:0042476 odontogenesis; GO:0048513 animal organ development; GO:0048731 system development; GO:0048856 anatomical structure development;	GO:0005622 intracellular; GO:0005623 cell; GO:0005634 nucleus; GO:0043226 organelle; GO:0043227 membrane-bounded organelle; GO:0043229 intracellular organelle; GO:0043231 intracellular membrane-bounded organelle; GO:0044424 intracellular part; GO:0044464 cell part;							O	KOG2813	Predicted molecular chaperone, contains DnaJ domain
F02_transcript_6364	hsp90b1, GP96, GRP94, fb61d09, tra-1, tra1, wu:fb61d09, wu:fq25g01; heat shock protein 90, beta (grp94), member 1; K09487 heat shock protein 90kDa beta (A)	91.683	28.7	22	53	18	0.79	0.781	1.1	1.128	1.146	1.083	1.257	0.167463	endoplasmic reticulum	GO:0001666 response to hypoxia; GO:0002218 activation of innate immune response; GO:0002221 pattern recognition receptor signaling pathway; GO:0002224 toll-like receptor signaling pathway; GO:0002253 activation of immune response; GO:0002376 immune system process; GO:0002682 regulation of immune system process; GO:0002684 positive regulation of immune system process; GO:0002757 immune response-ac…	GO:0005576 extracellular region; GO:0005615 extracellular space; GO:0005622 intracellular; GO:0005623 cell; GO:0005737 cytoplasm; GO:0005783 endoplasmic reticulum; GO:0005788 endoplasmic reticulum lumen; GO:0005789 endoplasmic reticulum membrane; GO:0005790 smooth endoplasmic reticulum; GO:0005829 cytosol; GO:0005886 plasma membrane; GO:0012505 endomembrane system; GO:0016020 membrane; GO:0030139…	GO:0003676 nucleic acid binding; GO:0003723 RNA binding; GO:0005102 receptor binding; GO:0005488 binding; GO:0005509 calcium ion binding; GO:0005515 protein binding; GO:0019899 enzyme binding; GO:0019902 phosphatase binding; GO:0019903 protein phosphatase binding; GO:0043167 ion binding; GO:0043169 cation binding; GO:0046872 metal ion binding; GO:0050750 low-density lipoprotein particle receptor …	K09487	HSP90B, TRA1; heat shock protein 90kDa beta	dre04141 Protein processing in endoplasmic reticulum - Danio rerio (zebrafish);	PF02518	Histidine kinase-, DNA gyrase B-, and HSP90-like ATPase	O	KOG0020	Endoplasmic reticulum glucose-regulated protein (GRP94/endoplasmin), HSP90 family
F02_transcript_8936	sodium/potassium-transporting ATPase subunit beta-233-like; K01540 sodium/potassium-transporting ATPase subunit beta (A)	14.463	11	1	1	1	0.831	0.821	1.022	1.099	1.215	1.046	1.257	0.05036	cytoplasm	GO:0001508 action potential; GO:0001666 response to hypoxia; GO:0002028 regulation of sodium ion transport; GO:0002376 immune system process; GO:0003008 system process; GO:0003012 muscle system process; GO:0003013 circulatory system process; GO:0003015 heart process; GO:0006139 nucleobase-containing compound metabolic process; GO:0006163 purine nucleotide metabolic process; GO:0006725 cellular ar…	GO:0005623 cell; GO:0005886 plasma membrane; GO:0005887 integral component of plasma membrane; GO:0005890 sodium:potassium-exchanging ATPase complex; GO:0005901 caveola; GO:0005911 cell-cell junction; GO:0014704 intercalated disc; GO:0016020 membrane; GO:0016021 integral component of membrane; GO:0016323 basolateral plasma membrane; GO:0016324 apical plasma membrane; GO:0030054 cell junction; GO:…	GO:0001671 ATPase activator activity; GO:0003824 catalytic activity; GO:0005215 transporter activity; GO:0005391 sodium:potassium-exchanging ATPase activity; GO:0005488 binding; GO:0005515 protein binding; GO:0008022 protein C-terminus binding; GO:0008047 enzyme activator activity; GO:0008324 cation transmembrane transporter activity; GO:0008556 potassium-transporting ATPase activity; GO:0015075 …	K01540	ATP1B, CD298; sodium/potassium-transporting ATPase subunit beta	dre04260 Cardiac muscle contraction - Danio rerio (zebrafish); dre04261 Adrenergic signaling in cardiomyocytes - Danio rerio (zebrafish);			P	KOG3927	Na+/K+ ATPase, beta subunit
F02_transcript_14998	ras-related protein Ral-A-like; K07834 Ras-related protein Ral-A (A)	23.395	19.4	4	7	2	0.85	0.829	0.994	1.078	1.028	1.252	1.256	0.050203	cytoplasm	GO:0001838 embryonic epithelial tube formation; GO:0001841 neural tube formation; GO:0001843 neural tube closure; GO:0002009 morphogenesis of an epithelium; GO:0006464 cellular protein modification process; GO:0006468 protein phosphorylation; GO:0006793 phosphorus metabolic process; GO:0006796 phosphate-containing compound metabolic process; GO:0006807 nitrogen compound metabolic process; GO:0006…	GO:0005622 intracellular; GO:0005623 cell; GO:0005737 cytoplasm; GO:0005829 cytosol; GO:0005886 plasma membrane; GO:0009986 cell surface; GO:0012506 vesicle membrane; GO:0016020 membrane; GO:0030659 cytoplasmic vesicle membrane; GO:0031090 organelle membrane; GO:0031410 cytoplasmic vesicle; GO:0031982 vesicle; GO:0032153 cell division site; GO:0032154 cleavage furrow; GO:0032155 cell division sit…	GO:0000166 nucleotide binding; GO:0001664 G-protein coupled receptor binding; GO:0001882 nucleoside binding; GO:0001883 purine nucleoside binding; GO:0003824 catalytic activity; GO:0003924 GTPase activity; GO:0004672 protein kinase activity; GO:0004713 protein tyrosine kinase activity; GO:0005102 receptor binding; GO:0005488 binding; GO:0005515 protein binding; GO:0005525 GTP binding; GO:0008092 …	K07834	RALA; Ras-related protein Ral-A		PF00071	Ras family	U	KOG0395	Ras-related GTPase
F02_transcript_16583	sat2b, SSAT-2, zgc:92773; spermidine/spermine N1-acetyltransferase family member 2b (EC:2.3.1.57); K00657 diamine N-acetyltransferase [EC:2.3.1.57] (A)	19.532	27.7	4	5	4	0.854	0.835	0.986	1.11	1.117	1.13	1.255	0.048124	cytoplasm	GO:0006576 cellular biogenic amine metabolic process; GO:0006595 polyamine metabolic process; GO:0006807 nitrogen compound metabolic process; GO:0008152 metabolic process; GO:0008215 spermine metabolic process; GO:0008216 spermidine metabolic process; GO:0009308 amine metabolic process; GO:0009445 putrescine metabolic process; GO:0009987 cellular process; GO:0017144 drug metabolic process; GO:003…	GO:0005622 intracellular; GO:0005623 cell; GO:0005737 cytoplasm; GO:0044424 intracellular part; GO:0044464 cell part;	GO:0003824 catalytic activity; GO:0004145 diamine N-acetyltransferase activity; GO:0005488 binding; GO:0005515 protein binding; GO:0008080 N-acetyltransferase activity; GO:0016407 acetyltransferase activity; GO:0016410 N-acyltransferase activity; GO:0016740 transferase activity; GO:0016746 transferase activity, transferring acyl groups; GO:0016747 transferase activity, transferring acyl groups ot…	K00657	speG, SAT; diamine N-acetyltransferase [EC:2.3.1.57]	dre00330 Arginine and proline metabolism - Danio rerio (zebrafish); dre01100 Metabolic pathways - Danio rerio (zebrafish); dre04216 Ferroptosis - Danio rerio (zebrafish);			E	KOG3216	Diamine acetyltransferase
F02_transcript_4540	kelch-like ECH-associated protein 1a [Danio rerio]	98.303	4.9	3	5	3	0.947	0.737	0.998	0.935	1.265	1.163	1.254	0.155622	extracellular		GO:0000151 ubiquitin ligase complex; GO:0005622 intracellular; GO:0005623 cell; GO:0031461 cullin-RING ubiquitin ligase complex; GO:0031463 Cul3-RING ubiquitin ligase complex; GO:0032991 macromolecular complex; GO:0044424 intracellular part; GO:0044464 cell part; GO:1902494 catalytic complex; GO:1990234 transferase complex;							S	KOG1072	FOG: Kelch repeat
F02_transcript_20978	24-hydroxycholesterol 7-alpha-hydroxylase [Stylophora pistillata]	45.21	2.5	1	1	1	0.833	0.802	1.043	1.012	1.123	1.222	1.254	0.079844	cytoplasm				K00489	CYP7A1; cholesterol 7alpha-monooxygenase [EC:1.14.14.23]	dre00120 Primary bile acid biosynthesis - Danio rerio (zebrafish); dre00140 Steroid hormone biosynthesis - Danio rerio (zebrafish); dre01100 Metabolic pathways - Danio rerio (zebrafish); dre03320 PPAR signaling pathway - Danio rerio (zebrafish);	PF00067	Cytochrome P450	Q	KOG0684	Cytochrome P450
F02_transcript_15058	serpinb14, im:7148243, si:ch73-303g23.4; serpin peptidase inhibitor, clade B (ovalbumin), member 14; K13963 serpin B (A)	48.788	42	16	51	2	1.009	0.887	0.778	1.318	0.871	1.162	1.253	0.20616	nucleus	GO:0000003 reproduction; GO:0001775 cell activation; GO:0001817 regulation of cytokine production; GO:0001819 positive regulation of cytokine production; GO:0001910 regulation of leukocyte mediated cytotoxicity; GO:0001911 negative regulation of leukocyte mediated cytotoxicity; GO:0002252 immune effector process; GO:0002253 activation of immune response; GO:0002263 cell activation involved in imm…	GO:0005576 extracellular region; GO:0005615 extracellular space; GO:0005622 intracellular; GO:0005623 cell; GO:0005634 nucleus; GO:0005654 nucleoplasm; GO:0005737 cytoplasm; GO:0005794 Golgi apparatus; GO:0005829 cytosol; GO:0005886 plasma membrane; GO:0012505 endomembrane system; GO:0012506 vesicle membrane; GO:0016020 membrane; GO:0030141 secretory granule; GO:0030659 cytoplasmic vesicle membra…	GO:0002020 protease binding; GO:0004857 enzyme inhibitor activity; GO:0004866 endopeptidase inhibitor activity; GO:0004867 serine-type endopeptidase inhibitor activity; GO:0004869 cysteine-type endopeptidase inhibitor activity; GO:0005488 binding; GO:0005515 protein binding; GO:0019899 enzyme binding; GO:0030234 enzyme regulator activity; GO:0030414 peptidase inhibitor activity; GO:0043027 cystei…	K13963	SERPINB; serpin B		PF00079	Serpin (serine protease inhibitor)	V	KOG2392	Serpin
F02_transcript_23888	rilp; Rab interacting lysosomal protein; K13883 Rab-interacting lysosomal protein (A)	50.525	8.8	4	4	4	0.881	0.836	0.921	1.042	1.223	1.038	1.252	0.021618	cytoplasm	GO:0006810 transport; GO:0006900 membrane budding; GO:0006996 organelle organization; GO:0007032 endosome organization; GO:0007034 vacuolar transport; GO:0007041 lysosomal transport; GO:0008333 endosome to lysosome transport; GO:0009892 negative regulation of metabolic process; GO:0009893 positive regulation of metabolic process; GO:0009894 regulation of catabolic process; GO:0009895 negative reg…	GO:0000323 lytic vacuole; GO:0005622 intracellular; GO:0005623 cell; GO:0005737 cytoplasm; GO:0005764 lysosome; GO:0005768 endosome; GO:0005770 late endosome; GO:0005773 vacuole; GO:0005815 microtubule organizing center; GO:0005856 cytoskeleton; GO:0005929 cilium; GO:0012505 endomembrane system; GO:0015630 microtubule cytoskeleton; GO:0031410 cytoplasmic vesicle; GO:0031982 vesicle; GO:0032991 ma…	GO:0005488 binding; GO:0005515 protein binding; GO:0017016 Ras GTPase binding; GO:0017137 Rab GTPase binding; GO:0019899 enzyme binding; GO:0031267 small GTPase binding; GO:0051020 GTPase binding; GO:0051959 dynein light intermediate chain binding;	K13883	RILP; Rab-interacting lysosomal protein	dre04145 Phagosome - Danio rerio (zebrafish); dre05132 Salmonella infection - Danio rerio (zebrafish);
F02_transcript_29192	Psma2; si:rp71-45k5.4 (EC:3.4.25.1); K02726 20S proteasome subunit alpha 2 [EC:3.4.25.1] (A)	25.905	33.3	6	10	3	0.837	0.916	0.928	1.086	1.187	1.08	1.251	0.0074029	cytoplasm	GO:0001775 cell activation; GO:0002252 immune effector process; GO:0002263 cell activation involved in immune response; GO:0002274 myeloid leukocyte activation; GO:0002275 myeloid cell activation involved in immune response; GO:0002283 neutrophil activation involved in immune response; GO:0002366 leukocyte activation involved in immune response; GO:0002376 immune system process; GO:0002443 leukoc…	GO:0000502 proteasome complex; GO:0000932 P-body; GO:0005576 extracellular region; GO:0005622 intracellular; GO:0005623 cell; GO:0005634 nucleus; GO:0005654 nucleoplasm; GO:0005737 cytoplasm; GO:0005829 cytosol; GO:0005839 proteasome core complex; GO:0012505 endomembrane system; GO:0019773 proteasome core complex, alpha-subunit complex; GO:0030141 secretory granule; GO:0031410 cytoplasmic vesicle…	GO:0005488 binding; GO:0005515 protein binding; GO:0042802 identical protein binding;	K02726	PSMA2; 20S proteasome subunit alpha 2 [EC:3.4.25.1]	dre03050 Proteasome - Danio rerio (zebrafish);	PF10584; PF00227	Proteasome subunit A N-terminal signature; Proteasome subunit	O	KOG0181	20S proteasome, regulatory subunit alpha type PSMA2/PRE8
F02_transcript_4150	nt5e, zgc:63784; 5'-nucleotidase, ecto (CD73) (EC:3.1.3.5); K01081 5'-nucleotidase [EC:3.1.3.5] (A)	24.489	30.8	7	12	7	0.884	0.885	0.909	1.08	1.141	1.127	1.25	0.00029969	cytoplasm	GO:0006139 nucleobase-containing compound metabolic process; GO:0006163 purine nucleotide metabolic process; GO:0006164 purine nucleotide biosynthetic process; GO:0006195 purine nucleotide catabolic process; GO:0006196 AMP catabolic process; GO:0006213 pyrimidine nucleoside metabolic process; GO:0006259 DNA metabolic process; GO:0006725 cellular aromatic compound metabolic process; GO:0006732 coe…	GO:0005622 intracellular; GO:0005623 cell; GO:0005634 nucleus; GO:0005654 nucleoplasm; GO:0005737 cytoplasm; GO:0005829 cytosol; GO:0005886 plasma membrane; GO:0009986 cell surface; GO:0016020 membrane; GO:0016021 integral component of membrane; GO:0031224 intrinsic component of membrane; GO:0031974 membrane-enclosed lumen; GO:0031981 nuclear lumen; GO:0043226 organelle; GO:0043227 membrane-bound…	GO:0003824 catalytic activity; GO:0005488 binding; GO:0005506 iron ion binding; GO:0008198 ferrous iron binding; GO:0008252 nucleotidase activity; GO:0008253 5'-nucleotidase activity; GO:0016787 hydrolase activity; GO:0016788 hydrolase activity, acting on ester bonds; GO:0016791 phosphatase activity; GO:0042578 phosphoric ester hydrolase activity; GO:0043167 ion binding; GO:0043169 cation binding…	K19970	NT5E, CD73; 5'-nucleotidase [EC:3.1.3.5]	dre00230 Purine metabolism - Danio rerio (zebrafish); dre00240 Pyrimidine metabolism - Danio rerio (zebrafish); dre00760 Nicotinate and nicotinamide metabolism - Danio rerio (zebrafish); dre01100 Metabolic pathways - Danio rerio (zebrafish);	PF02872	5'-nucleotidase, C-terminal domain	F	KOG4419	5' nucleotidase
F02_transcript_14196	alg11, si:dkey-1h24.5, wu:fj04e04; asparagine-linked glycosylation 11 (alpha-1,2-mannosyltransferase) (EC:2.4.1.131); K03844 alpha-1,2-mannosyltransferase [EC:2.4.1.131] (A)	47.222	6	2	2	2	0.841	0.729	1.112	1.077	1.136	1.138	1.249	0.197896	extracellular	GO:0006464 cellular protein modification process; GO:0006486 protein glycosylation; GO:0006490 oligosaccharide-lipid intermediate biosynthetic process; GO:0006629 lipid metabolic process; GO:0006807 nitrogen compound metabolic process; GO:0008152 metabolic process; GO:0009058 biosynthetic process; GO:0009059 macromolecule biosynthetic process; GO:0009100 glycoprotein metabolic process; GO:0009101…	GO:0005622 intracellular; GO:0005623 cell; GO:0005737 cytoplasm; GO:0005783 endoplasmic reticulum; GO:0005789 endoplasmic reticulum membrane; GO:0012505 endomembrane system; GO:0016020 membrane; GO:0031984 organelle subcompartment; GO:0042175 nuclear outer membrane-endoplasmic reticulum membrane network; GO:0043226 organelle; GO:0043227 membrane-bounded organelle; GO:0043229 intracellular organel…	GO:0000026 alpha-1,2-mannosyltransferase activity; GO:0000030 mannosyltransferase activity; GO:0003824 catalytic activity; GO:0004376 glycolipid mannosyltransferase activity; GO:0004377 GDP-Man:Man3GlcNAc2-PP-Dol alpha-1,2-mannosyltransferase activity; GO:0016740 transferase activity; GO:0016757 transferase activity, transferring glycosyl groups; GO:0016758 transferase activity, transferring hexo…	K03844	ALG11; alpha-1,2-mannosyltransferase [EC:2.4.1.131]	dre00510 N-Glycan biosynthesis - Danio rerio (zebrafish); dre00513 Various types of N-glycan biosynthesis - Danio rerio (zebrafish); dre01100 Metabolic pathways - Danio rerio (zebrafish);			M	KOG1387	Glycosyltransferase
F02_transcript_30288	cycsb, cyc, wu:fk52b01, zgc:86706; cytochrome c, somatic b; K08738 cytochrome c (A)	11.341	38.5	4	7	3	0.841	0.858	0.949	1.166	1.101	1.041	1.249	0.0109431	mitochondria	GO:0000003 reproduction; GO:0003006 developmental process involved in reproduction; GO:0006091 generation of precursor metabolites and energy; GO:0006119 oxidative phosphorylation; GO:0006122 mitochondrial electron transport, ubiquinol to cytochrome c; GO:0006123 mitochondrial electron transport, cytochrome c to oxygen; GO:0006139 nucleobase-containing compound metabolic process; GO:0006163 purin…	GO:0005622 intracellular; GO:0005623 cell; GO:0005737 cytoplasm; GO:0005739 mitochondrion; GO:0005740 mitochondrial envelope; GO:0005743 mitochondrial inner membrane; GO:0005758 mitochondrial intermembrane space; GO:0005829 cytosol; GO:0016020 membrane; GO:0019866 organelle inner membrane; GO:0031090 organelle membrane; GO:0031966 mitochondrial membrane; GO:0031967 organelle envelope; GO:0031970 …	GO:0003824 catalytic activity; GO:0005488 binding; GO:0009055 electron carrier activity; GO:0016491 oxidoreductase activity; GO:0020037 heme binding; GO:0046906 tetrapyrrole binding; GO:0048037 cofactor binding; GO:0097159 organic cyclic compound binding; GO:1901363 heterocyclic compound binding;	K08738	CYC; cytochrome c	dre04115 p53 signaling pathway - Danio rerio (zebrafish); dre04210 Apoptosis - Danio rerio (zebrafish); dre05168 Herpes simplex virus 1 infection - Danio rerio (zebrafish);	PF00034	Cytochrome c	C	KOG3453	Cytochrome c
F02_transcript_9096	Protein FAM114A2, partial [Stegodyphus mimosarum]	23.977	16.7	2	2	2	0.859	0.832	0.993	1.07	1.068	1.209	1.247	0.031142	nucleus		GO:0000137 Golgi cis cisterna; GO:0005622 intracellular; GO:0005623 cell; GO:0005737 cytoplasm; GO:0005794 Golgi apparatus; GO:0005795 Golgi stack; GO:0012505 endomembrane system; GO:0031984 organelle subcompartment; GO:0031985 Golgi cisterna; GO:0043226 organelle; GO:0043227 membrane-bounded organelle; GO:0043229 intracellular organelle; GO:0043231 intracellular membrane-bounded organelle; GO:00…	GO:0000166 nucleotide binding; GO:0005488 binding; GO:0005515 protein binding; GO:0017016 Ras GTPase binding; GO:0017076 purine nucleotide binding; GO:0017137 Rab GTPase binding; GO:0019899 enzyme binding; GO:0031267 small GTPase binding; GO:0036094 small molecule binding; GO:0051020 GTPase binding; GO:0097159 organic cyclic compound binding; GO:1901265 nucleoside phosphate binding; GO:1901363 he…
F02_transcript_16304	wdr12, YTM1, fb24f09, wu:fb24f09, zgc:55609; WD repeat domain 12; K14863 ribosome biogenesis protein YTM1 (A)	23.706	4.7	1	1	1	0.919	0.846	0.917	1.311	1.04	0.991	1.246	0.078236	nucleus	GO:0000460 maturation of 5.8S rRNA; GO:0000463 maturation of LSU-rRNA from tricistronic rRNA transcript (SSU-rRNA, 5.8S rRNA, LSU-rRNA); GO:0000466 maturation of 5.8S rRNA from tricistronic rRNA transcript (SSU-rRNA, 5.8S rRNA, LSU-rRNA); GO:0000470 maturation of LSU-rRNA; GO:0006139 nucleobase-containing compound metabolic process; GO:0006364 rRNA processing; GO:0006396 RNA processing; GO:000672…	GO:0005622 intracellular; GO:0005623 cell; GO:0005634 nucleus; GO:0005654 nucleoplasm; GO:0005730 nucleolus; GO:0030684 preribosome; GO:0030686 90S preribosome; GO:0030687 preribosome, large subunit precursor; GO:0031974 membrane-enclosed lumen; GO:0031981 nuclear lumen; GO:0032991 macromolecular complex; GO:0043226 organelle; GO:0043227 membrane-bounded organelle; GO:0043228 non-membrane-bounded…		K14863	YTM1, WDR12; ribosome biogenesis protein YTM1				Z	KOG0313	Microtubule binding protein YTM1 (contains WD40 repeats)
F02_transcript_5580	RAB27A; RAB27A, member RAS oncogene family; K07885 Ras-related protein Rab-27A (A)	25.325	25.6	6	9	4	0.889	0.885	0.915	1.18	1.084	1.086	1.246	0.00183903	cytoplasm	GO:0001775 cell activation; GO:0001906 cell killing; GO:0001909 leukocyte mediated cytotoxicity; GO:0001913 T cell mediated cytotoxicity; GO:0002228 natural killer cell mediated immunity; GO:0002250 adaptive immune response; GO:0002252 immune effector process; GO:0002263 cell activation involved in immune response; GO:0002274 myeloid leukocyte activation; GO:0002275 myeloid cell activation involv…	GO:0000323 lytic vacuole; GO:0001750 photoreceptor outer segment; GO:0005576 extracellular region; GO:0005622 intracellular; GO:0005623 cell; GO:0005737 cytoplasm; GO:0005764 lysosome; GO:0005768 endosome; GO:0005770 late endosome; GO:0005771 multivesicular body; GO:0005773 vacuole; GO:0005794 Golgi apparatus; GO:0005829 cytosol; GO:0005886 plasma membrane; GO:0005929 cilium; GO:0008021 synaptic …	GO:0000166 nucleotide binding; GO:0001882 nucleoside binding; GO:0001883 purine nucleoside binding; GO:0003824 catalytic activity; GO:0003924 GTPase activity; GO:0005488 binding; GO:0005515 protein binding; GO:0005525 GTP binding; GO:0008092 cytoskeletal protein binding; GO:0016462 pyrophosphatase activity; GO:0016787 hydrolase activity; GO:0016817 hydrolase activity, acting on acid anhydrides; G…	K07885	RAB27A; Ras-related protein Rab-27A		PF00071	Ras family	U	KOG0081	GTPase Rab27, small G protein superfamily
F02_transcript_10304	gelsolin-like; K05768 gelsolin (A)	79.551	62.2	42	253	1	0.793	0.969	0.93	1.198	1.081	1.076	1.246	0.03422	nucleus				K05768	GSN; gelsolin	dre04810 Regulation of actin cytoskeleton - Danio rerio (zebrafish);	PF00626	Gelsolin repeat	Z	KOG0443	Actin regulatory proteins (gelsolin/villin family)
F02_transcript_9779	dnajc5ga, dnajc5g, fb75d01, wu:fb75d01, zgc:56703; DnaJ (Hsp40) homolog, subfamily C, member 5 gamma a; K09525 DnaJ homolog subfamily C member 5 (A)	23.117	14.8	2	4	2	0.92	0.906	0.859	1.176	1.098	1.069	1.245	0.003415	cytoplasm				K09525	DNAJC5; DnaJ homolog subfamily C member 5	dre04141 Protein processing in endoplasmic reticulum - Danio rerio (zebrafish);	PF00226	DnaJ domain	O	KOG0716	Molecular chaperone (DnaJ superfamily)
F02_transcript_18854	reticulon-4 isoform 2 [Gallus gallus]	40.239	30.9	8	10	8	0.895	0.864	0.901	1.087	1.108	1.116	1.245	0.000137336	plasma membrane	GO:0001525 angiogenesis; GO:0001558 regulation of cell growth; GO:0001568 blood vessel development; GO:0001837 epithelial to mesenchymal transition; GO:0001944 vasculature development; GO:0003007 heart morphogenesis; GO:0006915 apoptotic process; GO:0006928 movement of cell or subcellular component; GO:0006996 organelle organization; GO:0006997 nucleus organization; GO:0006999 nuclear pore organi…	GO:0005622 intracellular; GO:0005623 cell; GO:0005634 nucleus; GO:0005635 nuclear envelope; GO:0005737 cytoplasm; GO:0005783 endoplasmic reticulum; GO:0005789 endoplasmic reticulum membrane; GO:0005886 plasma membrane; GO:0012505 endomembrane system; GO:0014069 postsynaptic density; GO:0016020 membrane; GO:0016021 integral component of membrane; GO:0030176 integral component of endoplasmic reticu…	GO:0005488 binding; GO:0005515 protein binding; GO:0019899 enzyme binding; GO:0031625 ubiquitin protein ligase binding; GO:0044389 ubiquitin-like protein ligase binding; GO:0044877 macromolecular complex binding;	K20720	RTN4; reticulon-4				U	KOG1792	Reticulon
F02_transcript_27337	Uncharacterized protein	22.195	10.8	2	3	2	0.798	0.87	1.017	1.135	1.103	1.106	1.245	0.088322	cytoplasm
F02_transcript_15806	vps26a, vps26, wu:fc67e06, zgc:56673; vacuolar protein sorting 26 homolog A (S. pombe); K18466 vacuolar protein sorting-associated protein 26 (A)	38.177	33.3	10	12	2	0.802	0.957	0.926	1.202	0.969	1.168	1.244	0.066916	cytoplasm	GO:0006810 transport; GO:0006886 intracellular protein transport; GO:0007154 cell communication; GO:0007165 signal transduction; GO:0007166 cell surface receptor signaling pathway; GO:0007267 cell-cell signaling; GO:0008104 protein localization; GO:0009894 regulation of catabolic process; GO:0009966 regulation of signal transduction; GO:0009987 cellular process; GO:0010506 regulation of autophagy…	GO:0000323 lytic vacuole; GO:0005622 intracellular; GO:0005623 cell; GO:0005737 cytoplasm; GO:0005764 lysosome; GO:0005768 endosome; GO:0005769 early endosome; GO:0005773 vacuole; GO:0005829 cytosol; GO:0010008 endosome membrane; GO:0012505 endomembrane system; GO:0016020 membrane; GO:0030904 retromer complex; GO:0030906 retromer, cargo-selective complex; GO:0031090 organelle membrane; GO:0031410…	GO:0005215 transporter activity; GO:0008565 protein transporter activity;	K18466	VPS26; vacuolar protein sorting-associated protein 26	dre04144 Endocytosis - Danio rerio (zebrafish);			U	KOG3063	Membrane coat complex Retromer, subunit VPS26
F02_transcript_23098	intermediate filament protein ON3-like; K07605 type II keratin, basic (A)	20.384	55.1	17	57	1	0.808	1.02	0.861	0.979	1.141	1.225	1.244	0.084705	nucleus	GO:0000003 reproduction; GO:0000902 cell morphogenesis; GO:0000904 cell morphogenesis involved in differentiation; GO:0001101 response to acid chemical; GO:0001701 in utero embryonic development; GO:0001890 placenta development; GO:0001892 embryonic placenta development; GO:0003006 developmental process involved in reproduction; GO:0006915 apoptotic process; GO:0006950 response to stress; GO:0006…	GO:0005622 intracellular; GO:0005623 cell; GO:0005737 cytoplasm; GO:0005829 cytosol; GO:0005856 cytoskeleton; GO:0005882 intermediate filament; GO:0005886 plasma membrane; GO:0005911 cell-cell junction; GO:0016010 dystrophin-associated glycoprotein complex; GO:0016020 membrane; GO:0016327 apicolateral plasma membrane; GO:0030016 myofibril; GO:0030017 sarcomere; GO:0030018 Z disc; GO:0030054 cell …	GO:0005488 binding; GO:0005515 protein binding; GO:0044877 macromolecular complex binding; GO:0097110 scaffold protein binding;	K07605	KRT2; type II keratin, basic
F02_transcript_353	TBC1 domain family member 10B [Zootermopsis nevadensis]	26.925	10.9	2	2	2	0.979	1.05	0.656	1.348	0.973	1.02	1.244	0.26966	cytoplasm	GO:0006508 proteolysis; GO:0006807 nitrogen compound metabolic process; GO:0006810 transport; GO:0006886 intracellular protein transport; GO:0007275 multicellular organism development; GO:0007424 open tracheal system development; GO:0008104 protein localization; GO:0008152 metabolic process; GO:0009653 anatomical structure morphogenesis; GO:0009893 positive regulation of metabolic process; GO:001…	GO:0005622 intracellular; GO:0005623 cell; GO:0005886 plasma membrane; GO:0005902 microvillus; GO:0012505 endomembrane system; GO:0016020 membrane; GO:0030175 filopodium; GO:0042995 cell projection; GO:0044464 cell part; GO:0071944 cell periphery; GO:0098858 actin-based cell projection;	GO:0005096 GTPase activator activity; GO:0005488 binding; GO:0005515 protein binding; GO:0008047 enzyme activator activity; GO:0017016 Ras GTPase binding; GO:0017137 Rab GTPase binding; GO:0019899 enzyme binding; GO:0019904 protein domain specific binding; GO:0030165 PDZ domain binding; GO:0030234 enzyme regulator activity; GO:0030695 GTPase regulator activity; GO:0031267 small GTPase binding; GO…	K19944	TBC1D10; TBC1 domain family member 10				U	KOG2221	PDZ-domain interacting protein EPI64, contains TBC domain
F02_transcript_19264	poly [ADP-ribose] polymerase 2-like; K10798 poly [ADP-ribose] polymerase [EC:2.4.2.30] (A)	44.724	3	1	1	1	0.759	0.948	0.981	1.064	1.114	1.164	1.243	0.057364	nucleus	GO:0001558 regulation of cell growth; GO:0006139 nucleobase-containing compound metabolic process; GO:0006259 DNA metabolic process; GO:0006260 DNA replication; GO:0006261 DNA-dependent DNA replication; GO:0006266 DNA ligation; GO:0006271 DNA strand elongation involved in DNA replication; GO:0006273 lagging strand elongation; GO:0006281 DNA repair; GO:0006284 base-excision repair; GO:0006464 cell…	GO:0005622 intracellular; GO:0005623 cell; GO:0005634 nucleus; GO:0005654 nucleoplasm; GO:0005730 nucleolus; GO:0005737 cytoplasm; GO:0031974 membrane-enclosed lumen; GO:0031981 nuclear lumen; GO:0043226 organelle; GO:0043227 membrane-bounded organelle; GO:0043228 non-membrane-bounded organelle; GO:0043229 intracellular organelle; GO:0043231 intracellular membrane-bounded organelle; GO:0043232 in…	GO:0003824 catalytic activity; GO:0003909 DNA ligase activity; GO:0003910 DNA ligase (ATP) activity; GO:0003950 NAD+ ADP-ribosyltransferase activity; GO:0016740 transferase activity; GO:0016757 transferase activity, transferring glycosyl groups; GO:0016763 transferase activity, transferring pentosyl groups; GO:0016874 ligase activity; GO:0016886 ligase activity, forming phosphoric ester bonds; GO…	K10798	PARP; poly [ADP-ribose] polymerase [EC:2.4.2.30]	dre03410 Base excision repair - Danio rerio (zebrafish); dre04210 Apoptosis - Danio rerio (zebrafish); dre04217 Necroptosis - Danio rerio (zebrafish);	PF05406; PF02877	WGR domain; Poly(ADP-ribose) polymerase, regulatory domain	KLO	KOG1037	NAD+ ADP-ribosyltransferase Parp, required for poly-ADP ribosylation of nuclear proteins
F02_transcript_11275	nuclear pore complex protein Nup50-like; K14295 nuclear pore complex protein Nup50 (A)	29.363	9.4	2	2	2	0.969	0.811	0.909	1.186	1.116	1.041	1.243	0.027084	nucleus	GO:0001838 embryonic epithelial tube formation; GO:0001841 neural tube formation; GO:0002009 morphogenesis of an epithelium; GO:0006403 RNA localization; GO:0006405 RNA export from nucleus; GO:0006406 mRNA export from nucleus; GO:0006606 protein import into nucleus; GO:0006611 protein export from nucleus; GO:0006810 transport; GO:0006886 intracellular protein transport; GO:0006913 nucleocytoplasm…	GO:0005622 intracellular; GO:0005623 cell; GO:0005634 nucleus; GO:0005635 nuclear envelope; GO:0005643 nuclear pore; GO:0005654 nucleoplasm; GO:0012505 endomembrane system; GO:0016020 membrane; GO:0031090 organelle membrane; GO:0031965 nuclear membrane; GO:0031967 organelle envelope; GO:0031974 membrane-enclosed lumen; GO:0031975 envelope; GO:0031981 nuclear lumen; GO:0032991 macromolecular compl…	GO:0005488 binding; GO:0005515 protein binding; GO:0008536 Ran GTPase binding; GO:0017016 Ras GTPase binding; GO:0019899 enzyme binding; GO:0031267 small GTPase binding; GO:0051020 GTPase binding;	K14295	NUP50, NPAP60; nuclear pore complex protein Nup50	dre03013 RNA transport - Danio rerio (zebrafish);	PF08911	NUP50 (Nucleoporin 50 kDa)	U	KOG2724	Nuclear pore complex component NPAP60L/NUP50
F02_transcript_25900	ube2v1, im:7136154, zgc:123326; ubiquitin-conjugating enzyme E2 variant 1; K10704 ubiquitin-conjugating enzyme E2 variant (A)	16.496	62.6	9	13	7	0.907	0.843	0.894	1.072	1.129	1.084	1.242	0.00136029	cytoplasm	GO:0000209 protein polyubiquitination; GO:0006139 nucleobase-containing compound metabolic process; GO:0006259 DNA metabolic process; GO:0006281 DNA repair; GO:0006301 postreplication repair; GO:0006355 regulation of transcription, DNA-templated; GO:0006464 cellular protein modification process; GO:0006725 cellular aromatic compound metabolic process; GO:0006807 nitrogen compound metabolic proces…	GO:0000151 ubiquitin ligase complex; GO:0005622 intracellular; GO:0005623 cell; GO:0005634 nucleus; GO:0005654 nucleoplasm; GO:0005737 cytoplasm; GO:0031371 ubiquitin conjugating enzyme complex; GO:0031974 membrane-enclosed lumen; GO:0031981 nuclear lumen; GO:0032991 macromolecular complex; GO:0035370 UBC13-UEV1A complex; GO:0043226 organelle; GO:0043227 membrane-bounded organelle; GO:0043229 int…	GO:0003824 catalytic activity; GO:0004842 ubiquitin-protein transferase activity; GO:0005488 binding; GO:0005515 protein binding; GO:0016740 transferase activity; GO:0019787 ubiquitin-like protein transferase activity; GO:0019899 enzyme binding; GO:0031624 ubiquitin conjugating enzyme binding; GO:0031625 ubiquitin protein ligase binding; GO:0044389 ubiquitin-like protein ligase binding; GO:004439…	K10704	UBE2V; ubiquitin-conjugating enzyme E2 variant		PF00179	Ubiquitin-conjugating enzyme	O	KOG0896	Ubiquitin-conjugating enzyme E2
F02_transcript_23375	hnrnpaba, hm:zeh1271, hnrnpab, hnrpab, wu:fa18g02, wu:fb07b06, wu:fb16c05, zeh1271; heterogeneous nuclear ribonucleoprotein A/Ba; K13044 heterogeneous nuclear ribonucleoprotein A/B/D (A)	41.649	13.7	4	5	3	0.707	0.902	1.079	1.13	1.074	1.133	1.241	0.2032	nucleus	GO:0000122 negative regulation of transcription from RNA polymerase II promoter; GO:0001837 epithelial to mesenchymal transition; GO:0006355 regulation of transcription, DNA-templated; GO:0006357 regulation of transcription from RNA polymerase II promoter; GO:0007275 multicellular organism development; GO:0009888 tissue development; GO:0009889 regulation of biosynthetic process; GO:0009890 negati…	GO:0005622 intracellular; GO:0005623 cell; GO:0005634 nucleus; GO:0005654 nucleoplasm; GO:0005667 transcription factor complex; GO:0005737 cytoplasm; GO:0031974 membrane-enclosed lumen; GO:0031981 nuclear lumen; GO:0032991 macromolecular complex; GO:0043226 organelle; GO:0043227 membrane-bounded organelle; GO:0043229 intracellular organelle; GO:0043231 intracellular membrane-bounded organelle; GO…	GO:0003676 nucleic acid binding; GO:0003723 RNA binding; GO:0003729 mRNA binding; GO:0005488 binding; GO:0097159 organic cyclic compound binding; GO:1901363 heterocyclic compound binding;	K13044	HNRNPABD; heterogeneous nuclear ribonucleoprotein A/B/D		PF00076	RNA recognition motif. (a.k.a. RRM, RBD, or RNP domain)	A	KOG0118	FOG: RRM domain
F02_transcript_28076	ube2l3a, ube2l3, wu:fc22h11, zgc:86727; ubiquitin-conjugating enzyme E2L 3a (EC:6.3.2.19); K04552 ubiquitin-conjugating enzyme E2 L3 [EC:6.3.2.19] (A)	17.884	42.9	7	14	3	0.836	1.051	0.802	1.219	0.988	1.128	1.24	0.103344	cytoplasm,nucleus	GO:0000209 protein polyubiquitination; GO:0006355 regulation of transcription, DNA-templated; GO:0006464 cellular protein modification process; GO:0006508 proteolysis; GO:0006511 ubiquitin-dependent protein catabolic process; GO:0006807 nitrogen compound metabolic process; GO:0007049 cell cycle; GO:0008152 metabolic process; GO:0008283 cell proliferation; GO:0009056 catabolic process; GO:0009057 …	GO:0000151 ubiquitin ligase complex; GO:0005622 intracellular; GO:0005623 cell; GO:0005634 nucleus; GO:0005654 nucleoplasm; GO:0005737 cytoplasm; GO:0005829 cytosol; GO:0031974 membrane-enclosed lumen; GO:0031981 nuclear lumen; GO:0032991 macromolecular complex; GO:0043226 organelle; GO:0043227 membrane-bounded organelle; GO:0043229 intracellular organelle; GO:0043231 intracellular membrane-bound…	GO:0003712 transcription cofactor activity; GO:0003713 transcription coactivator activity; GO:0003824 catalytic activity; GO:0004842 ubiquitin-protein transferase activity; GO:0005488 binding; GO:0005515 protein binding; GO:0016740 transferase activity; GO:0019787 ubiquitin-like protein transferase activity; GO:0019899 enzyme binding; GO:0030234 enzyme regulator activity; GO:0031625 ubiquitin pro…	K04552	UBE2L3, UBCH7; ubiquitin-conjugating enzyme E2 L3 [EC:2.3.2.23]	dre04120 Ubiquitin mediated proteolysis - Danio rerio (zebrafish);	PF00179	Ubiquitin-conjugating enzyme	O	KOG0422	Ubiquitin-protein ligase
F02_transcript_14320	heat shock protein HSP 90-alpha-like; K04079 molecular chaperone HtpG (A)	83.536	26.1	19	48	2	0.904	0.881	0.908	1.138	1.041	1.158	1.239	0.0033987	cytoplasm	GO:0000086 G2/M transition of mitotic cell cycle; GO:0000278 mitotic cell cycle; GO:0000723 telomere maintenance; GO:0000902 cell morphogenesis; GO:0000904 cell morphogenesis involved in differentiation; GO:0001505 regulation of neurotransmitter levels; GO:0001764 neuron migration; GO:0001775 cell activation; GO:0001932 regulation of protein phosphorylation; GO:0001934 positive regulation of prot…	GO:0000323 lytic vacuole; GO:0001726 ruffle; GO:0005576 extracellular region; GO:0005622 intracellular; GO:0005623 cell; GO:0005634 nucleus; GO:0005654 nucleoplasm; GO:0005737 cytoplasm; GO:0005764 lysosome; GO:0005765 lysosomal membrane; GO:0005773 vacuole; GO:0005774 vacuolar membrane; GO:0005775 vacuolar lumen; GO:0005829 cytosol; GO:0005886 plasma membrane; GO:0005903 brush border; GO:0005929…	GO:0000166 nucleotide binding; GO:0001882 nucleoside binding; GO:0001883 purine nucleoside binding; GO:0001884 pyrimidine nucleoside binding; GO:0002134 UTP binding; GO:0002135 CTP binding; GO:0003676 nucleic acid binding; GO:0003723 RNA binding; GO:0003729 mRNA binding; GO:0003824 catalytic activity; GO:0004672 protein kinase activity; GO:0004713 protein tyrosine kinase activity; GO:0005102 rece…	K04079	HSP90A, htpG; molecular chaperone HtpG	dre04141 Protein processing in endoplasmic reticulum - Danio rerio (zebrafish); dre04217 Necroptosis - Danio rerio (zebrafish); dre04621 NOD-like receptor signaling pathway - Danio rerio (zebrafish); dre04914 Progesterone-mediated oocyte maturation - Danio rerio (zebrafish);	PF02518	Histidine kinase-, DNA gyrase B-, and HSP90-like ATPase	O	KOG0019	Molecular chaperone (HSP90 family)
F02_transcript_5480	glutamate--cysteine ligase catalytic subunit-like; K11204 glutamate--cysteine ligase catalytic subunit [EC:6.3.2.2] (A)	72.139	9.1	5	6	5	0.955	0.88	0.854	1.054	1.264	1.007	1.237	0.053736	cytoplasm	GO:0000096 sulfur amino acid metabolic process; GO:0000302 response to reactive oxygen species; GO:0000303 response to superoxide; GO:0000305 response to oxygen radical; GO:0000902 cell morphogenesis; GO:0000904 cell morphogenesis involved in differentiation; GO:0001101 response to acid chemical; GO:0001678 cellular glucose homeostasis; GO:0002009 morphogenesis of an epithelium; GO:0002165 instar…	GO:0005622 intracellular; GO:0005623 cell; GO:0005634 nucleus; GO:0005737 cytoplasm; GO:0005829 cytosol; GO:0017109 glutamate-cysteine ligase complex; GO:0032991 macromolecular complex; GO:0043226 organelle; GO:0043227 membrane-bounded organelle; GO:0043229 intracellular organelle; GO:0043231 intracellular membrane-bounded organelle; GO:0044424 intracellular part; GO:0044444 cytoplasmic part; GO:…	GO:0000166 nucleotide binding; GO:0000287 magnesium ion binding; GO:0003824 catalytic activity; GO:0004357 glutamate-cysteine ligase activity; GO:0005488 binding; GO:0005515 protein binding; GO:0016595 glutamate binding; GO:0016597 amino acid binding; GO:0016874 ligase activity; GO:0016879 ligase activity, forming carbon-nitrogen bonds; GO:0016881 acid-amino acid ligase activity; GO:0017076 purin…	K11204	GCLC; glutamate--cysteine ligase catalytic subunit [EC:6.3.2.2]	dre00270 Cysteine and methionine metabolism - Danio rerio (zebrafish); dre00480 Glutathione metabolism - Danio rerio (zebrafish); dre01100 Metabolic pathways - Danio rerio (zebrafish); dre04216 Ferroptosis - Danio rerio (zebrafish);			H	KOG3754	Gamma-glutamylcysteine synthetase
F02_transcript_28396	ferritin, middle subunit-like; K00522 ferritin heavy chain [EC:1.16.3.2] (A)	20.601	54.2	10	20	10	0.875	0.908	0.853	1.089	1.066	1.105	1.237	0.00052392	cytoplasm							PF00210	Ferritin-like domain	P	KOG2332	Ferritin
F02_transcript_30068	snrpd1, CHUNP6882, fk26a01, snprd1, snrnpd1, wu:fk26a01, zgc:86929; small nuclear ribonucleoprotein D1 polypeptide; K11087 small nuclear ribonucleoprotein D1 (A)	13.299	10.9	1	1	1	0.898	0.378	1.419	1.159	1.056	1.12	1.237	0.46454	nucleus	GO:0000245 spliceosomal complex assembly; GO:0000375 RNA splicing, via transesterification reactions; GO:0000377 RNA splicing, via transesterification reactions with bulged adenosine as nucleophile; GO:0000387 spliceosomal snRNP assembly; GO:0000398 mRNA splicing, via spliceosome; GO:0006139 nucleobase-containing compound metabolic process; GO:0006396 RNA processing; GO:0006397 mRNA processing; G…	GO:0000243 commitment complex; GO:0005622 intracellular; GO:0005623 cell; GO:0005634 nucleus; GO:0005654 nucleoplasm; GO:0005681 spliceosomal complex; GO:0005682 U5 snRNP; GO:0005684 U2-type spliceosomal complex; GO:0005685 U1 snRNP; GO:0005686 U2 snRNP; GO:0005687 U4 snRNP; GO:0005689 U12-type spliceosomal complex; GO:0005737 cytoplasm; GO:0005829 cytosol; GO:0030532 small nuclear ribonucleoprot…	GO:0003676 nucleic acid binding; GO:0003723 RNA binding; GO:0005488 binding; GO:0043021 ribonucleoprotein complex binding; GO:0044877 macromolecular complex binding; GO:0070990 snRNP binding; GO:0097159 organic cyclic compound binding; GO:1901363 heterocyclic compound binding; GO:1990446 U1 snRNP binding;	K11087	SNRPD1, SMD1; small nuclear ribonucleoprotein D1	dre03040 Spliceosome - Danio rerio (zebrafish);	PF01423	LSM domain	A	KOG3428	Small nuclear ribonucleoprotein SMD1 and related snRNPs
F02_transcript_25198	Uncharacterized protein	10.753	9.4	1	10	1	0.903	0.97	0.811	1.163	1.023	1.13	1.235	0.030655	plasma membrane							PF01023	S-100/ICaBP type calcium binding domain
F02_transcript_1094	semaphorin-7A-like; K06529 semaphorin 7 (A)	15.09	6.6	1	1	1	0.881	0.856	0.964	1.005	1.095	1.234	1.234	0.039983	extracellular				K06840	SEMA3; semaphorin 3				T	KOG3611	Semaphorins
F02_transcript_23750	Dehydrogenase/reductase SDR family member 11, partial [Stegodyphus mimosarum]	27.763	39.2	8	18	8	0.909	0.922	0.828	1.082	1.11	1.087	1.233	0.0036962	extracellular	GO:0003008 system process; GO:0006629 lipid metabolic process; GO:0006694 steroid biosynthetic process; GO:0006714 sesquiterpenoid metabolic process; GO:0006716 juvenile hormone metabolic process; GO:0006718 juvenile hormone biosynthetic process; GO:0006720 isoprenoid metabolic process; GO:0006721 terpenoid metabolic process; GO:0006726 eye pigment biosynthetic process; GO:0006807 nitrogen compou…	GO:0005622 intracellular; GO:0005623 cell; GO:0005737 cytoplasm; GO:0044424 intracellular part; GO:0044464 cell part;	GO:0000253 3-keto sterol reductase activity; GO:0003824 catalytic activity; GO:0004303 estradiol 17-beta-dehydrogenase activity; GO:0004745 retinol dehydrogenase activity; GO:0016229 steroid dehydrogenase activity; GO:0016491 oxidoreductase activity; GO:0016614 oxidoreductase activity, acting on CH-OH group of donors; GO:0016616 oxidoreductase activity, acting on the CH-OH group of donors, NAD or…	K22970	dre00140 Steroid hormone biosynthesis - Danio rerio (zebrafish);		PF00106	short chain dehydrogenase	Q	KOG1205	Predicted dehydrogenase
F02_transcript_27347	betaine--homocysteine S-methyltransferase 1-like; K00544 betaine-homocysteine S-methyltransferase [EC:2.1.1.5] (A)	32.108	48.1	8	24	8	0.882	0.839	0.963	1.069	1.107	1.132	1.232	0.0084843	cytoplasm	GO:0000096 sulfur amino acid metabolic process; GO:0000097 sulfur amino acid biosynthetic process; GO:0001505 regulation of neurotransmitter levels; GO:0006082 organic acid metabolic process; GO:0006464 cellular protein modification process; GO:0006479 protein methylation; GO:0006520 cellular amino acid metabolic process; GO:0006521 regulation of cellular amino acid metabolic process; GO:0006555 …	GO:0005576 extracellular region; GO:0005615 extracellular space; GO:0005622 intracellular; GO:0005623 cell; GO:0005737 cytoplasm; GO:0005829 cytosol; GO:0031982 vesicle; GO:0032991 macromolecular complex; GO:0043226 organelle; GO:0043227 membrane-bounded organelle; GO:0043230 extracellular organelle; GO:0044421 extracellular region part; GO:0044424 intracellular part; GO:0044444 cytoplasmic part;…	GO:0003824 catalytic activity; GO:0005488 binding; GO:0008168 methyltransferase activity; GO:0008172 S-methyltransferase activity; GO:0008270 zinc ion binding; GO:0016740 transferase activity; GO:0016741 transferase activity, transferring one-carbon groups; GO:0043167 ion binding; GO:0043169 cation binding; GO:0044877 macromolecular complex binding; GO:0046872 metal ion binding; GO:0046914 transi…	K00544	BHMT; betaine-homocysteine S-methyltransferase [EC:2.1.1.5]	dre00260 Glycine, serine and threonine metabolism - Danio rerio (zebrafish); dre00270 Cysteine and methionine metabolism - Danio rerio (zebrafish); dre01100 Metabolic pathways - Danio rerio (zebrafish);			E	KOG1579	Homocysteine S-methyltransferase
F02_transcript_22229	calreticulin-like; K08057 calreticulin (A)	49.108	46.6	18	30	12	0.776	0.799	1.099	1.033	1.159	1.103	1.232	0.130857	endoplasmic reticulum	GO:0000003 reproduction; GO:0000122 negative regulation of transcription from RNA polymerase II promoter; GO:0002376 immune system process; GO:0002396 MHC protein complex assembly; GO:0002397 MHC class I protein complex assembly; GO:0002474 antigen processing and presentation of peptide antigen via MHC class I; GO:0002478 antigen processing and presentation of exogenous peptide antigen; GO:000247…	GO:0001669 acrosomal vesicle; GO:0005576 extracellular region; GO:0005615 extracellular space; GO:0005622 intracellular; GO:0005623 cell; GO:0005634 nucleus; GO:0005635 nuclear envelope; GO:0005737 cytoplasm; GO:0005783 endoplasmic reticulum; GO:0005788 endoplasmic reticulum lumen; GO:0005789 endoplasmic reticulum membrane; GO:0005790 smooth endoplasmic reticulum; GO:0005793 endoplasmic reticulum…	GO:0001846 opsonin binding; GO:0001848 complement binding; GO:0001849 complement component C1q binding; GO:0003676 nucleic acid binding; GO:0003677 DNA binding; GO:0003723 RNA binding; GO:0003729 mRNA binding; GO:0005102 receptor binding; GO:0005178 integrin binding; GO:0005488 binding; GO:0005506 iron ion binding; GO:0005509 calcium ion binding; GO:0005515 protein binding; GO:0008134 transcripti…	K08057	CALR; calreticulin	dre04141 Protein processing in endoplasmic reticulum - Danio rerio (zebrafish); dre04145 Phagosome - Danio rerio (zebrafish); dre05168 Herpes simplex virus 1 infection - Danio rerio (zebrafish);			O	KOG0674	Calreticulin
F02_transcript_4240	Uncharacterized protein	26.602	4	1	3	1	0.819	0.856	1.013	0.959	1.219	1.131	1.231	0.0971	nucleus
F02_transcript_25898	COP9 signalosome complex subunit 3-like; K12177 COP9 signalosome complex subunit 3 (A)	47.655	18	7	7	2	0.9	0.895	0.908	1.131	1.103	1.093	1.231	4.3598e-05	cytoplasm	GO:0000003 reproduction; GO:0000226 microtubule cytoskeleton organization; GO:0000278 mitotic cell cycle; GO:0000281 mitotic cytokinesis; GO:0000338 protein deneddylation; GO:0000715 nucleotide-excision repair, DNA damage recognition; GO:0000910 cytokinesis; GO:0001701 in utero embryonic development; GO:0002009 morphogenesis of an epithelium; GO:0003006 developmental process involved in reproduct…	GO:0005622 intracellular; GO:0005623 cell; GO:0005634 nucleus; GO:0005654 nucleoplasm; GO:0005737 cytoplasm; GO:0005829 cytosol; GO:0008180 COP9 signalosome; GO:0031974 membrane-enclosed lumen; GO:0031981 nuclear lumen; GO:0032991 macromolecular complex; GO:0043226 organelle; GO:0043227 membrane-bounded organelle; GO:0043229 intracellular organelle; GO:0043231 intracellular membrane-bounded organ…	GO:0005488 binding; GO:0005515 protein binding;	K12177	COPS3, CSN3; COP9 signalosome complex subunit 3		PF01399	PCI domain	OT	KOG2582	COP9 signalosome, subunit CSN3
F02_transcript_23878	snx27b, snx27, zgc:66094, zgc:77922; sorting nexin family member 27b; K17936 sorting nexin-27 (A)	59.997	1.8	1	2	1	0.927	0.846	0.934	1.041	1.217	1.073	1.231	0.022997	nucleus	GO:0001767 establishment of lymphocyte polarity; GO:0001770 establishment of natural killer cell polarity; GO:0001775 cell activation; GO:0002376 immune system process; GO:0006810 transport; GO:0006886 intracellular protein transport; GO:0007034 vacuolar transport; GO:0007041 lysosomal transport; GO:0007163 establishment or maintenance of cell polarity; GO:0007275 multicellular organism developme…	GO:0001772 immunological synapse; GO:0005622 intracellular; GO:0005623 cell; GO:0005634 nucleus; GO:0005654 nucleoplasm; GO:0005737 cytoplasm; GO:0005768 endosome; GO:0005769 early endosome; GO:0005829 cytosol; GO:0005886 plasma membrane; GO:0010008 endosome membrane; GO:0012505 endomembrane system; GO:0014069 postsynaptic density; GO:0016020 membrane; GO:0031090 organelle membrane; GO:0031410 cy…	GO:0005102 receptor binding; GO:0005488 binding; GO:0005515 protein binding; GO:0005543 phospholipid binding; GO:0008289 lipid binding; GO:0032266 phosphatidylinositol-3-phosphate binding; GO:0035091 phosphatidylinositol binding; GO:0035254 glutamate receptor binding; GO:0035255 ionotropic glutamate receptor binding; GO:0043167 ion binding; GO:0043168 anion binding; GO:1901981 phosphatidylinosito…	K17936	SNX27; sorting nexin-27		PF00787; PF00788	PX domain; Ras association (RalGDS/AF-6) domain	T	KOG3784	Sorting nexin protein SNX27
F02_transcript_22512	annexin A3-like; K17089 annexin A3 (A)	17.386	52.8	6	18	2	0.892	0.754	1.013	1.083	1.109	1.081	1.231	0.129442	cytoplasm	GO:0001775 cell activation; GO:0002252 immune effector process; GO:0002263 cell activation involved in immune response; GO:0002274 myeloid leukocyte activation; GO:0002275 myeloid cell activation involved in immune response; GO:0002283 neutrophil activation involved in immune response; GO:0002366 leukocyte activation involved in immune response; GO:0002376 immune system process; GO:0002443 leukoc…	GO:0005622 intracellular; GO:0005623 cell; GO:0005737 cytoplasm; GO:0005829 cytosol; GO:0005886 plasma membrane; GO:0012505 endomembrane system; GO:0012506 vesicle membrane; GO:0016020 membrane; GO:0030139 endocytic vesicle; GO:0030141 secretory granule; GO:0030424 axon; GO:0030425 dendrite; GO:0030659 cytoplasmic vesicle membrane; GO:0030666 endocytic vesicle membrane; GO:0030670 phagocytic vesi…	GO:0003779 actin binding; GO:0004857 enzyme inhibitor activity; GO:0004859 phospholipase inhibitor activity; GO:0005488 binding; GO:0005515 protein binding; GO:0005543 phospholipid binding; GO:0005544 calcium-dependent phospholipid binding; GO:0008092 cytoskeletal protein binding; GO:0008289 lipid binding; GO:0019834 phospholipase A2 inhibitor activity; GO:0030234 enzyme regulator activity; GO:00…	K17089	ANXA3; annexin A3				U	KOG0819	Annexin
F02_transcript_14503	nampta, nampt; nicotinamide phosphoribosyltransferase a; K03462 nicotinamide phosphoribosyltransferase [EC:2.4.2.12] (A)	41.013	39.4	11	11	6	0.942	0.815	0.921	1.202	1.019	1.069	1.229	0.036738	cytoplasm	GO:0000003 reproduction; GO:0006139 nucleobase-containing compound metabolic process; GO:0006355 regulation of transcription, DNA-templated; GO:0006357 regulation of transcription from RNA polymerase II promoter; GO:0006725 cellular aromatic compound metabolic process; GO:0006732 coenzyme metabolic process; GO:0006733 oxidoreduction coenzyme metabolic process; GO:0006753 nucleoside phosphate meta…	GO:0005622 intracellular; GO:0005623 cell; GO:0005634 nucleus; GO:0005654 nucleoplasm; GO:0005737 cytoplasm; GO:0005829 cytosol; GO:0016604 nuclear body; GO:0016607 nuclear speck; GO:0030054 cell junction; GO:0031974 membrane-enclosed lumen; GO:0031981 nuclear lumen; GO:0043226 organelle; GO:0043227 membrane-bounded organelle; GO:0043229 intracellular organelle; GO:0043231 intracellular membrane-…	GO:0003824 catalytic activity; GO:0005102 receptor binding; GO:0005125 cytokine activity; GO:0005488 binding; GO:0005515 protein binding; GO:0008144 drug binding; GO:0016740 transferase activity; GO:0016757 transferase activity, transferring glycosyl groups; GO:0016763 transferase activity, transferring pentosyl groups; GO:0030545 receptor regulator activity; GO:0042802 identical protein binding;…	K03462	NAMPT; nicotinamide phosphoribosyltransferase [EC:2.4.2.12]	dre00760 Nicotinate and nicotinamide metabolism - Danio rerio (zebrafish); dre01100 Metabolic pathways - Danio rerio (zebrafish); dre04621 NOD-like receptor signaling pathway - Danio rerio (zebrafish);
F02_transcript_26348	bdh2, zgc:110323; 3-hydroxybutyrate dehydrogenase, type 2 (EC:1.1.1.30); K00019 3-hydroxybutyrate dehydrogenase [EC:1.1.1.30] (A)	26.727	41.6	10	14	10	0.952	0.855	0.92	1.111	1.157	1.084	1.229	0.0049847	cytoplasm	GO:0002262 myeloid cell homeostasis; GO:0002376 immune system process; GO:0002520 immune system development; GO:0006082 organic acid metabolic process; GO:0006091 generation of precursor metabolites and energy; GO:0006518 peptide metabolic process; GO:0006629 lipid metabolic process; GO:0006631 fatty acid metabolic process; GO:0006635 fatty acid beta-oxidation; GO:0006725 cellular aromatic compou…	GO:0005622 intracellular; GO:0005623 cell; GO:0005737 cytoplasm; GO:0005829 cytosol; GO:0044424 intracellular part; GO:0044444 cytoplasmic part; GO:0044464 cell part;	GO:0000166 nucleotide binding; GO:0003824 catalytic activity; GO:0003858 3-hydroxybutyrate dehydrogenase activity; GO:0005488 binding; GO:0016491 oxidoreductase activity; GO:0016614 oxidoreductase activity, acting on CH-OH group of donors; GO:0016616 oxidoreductase activity, acting on the CH-OH group of donors, NAD or NADP as acceptor; GO:0016627 oxidoreductase activity, acting on the CH-CH group…	K00019	E1.1.1.30, bdh; 3-hydroxybutyrate dehydrogenase [EC:1.1.1.30]	dre00072 Synthesis and degradation of ketone bodies - Danio rerio (zebrafish); dre00650 Butanoate metabolism - Danio rerio (zebrafish); dre01100 Metabolic pathways - Danio rerio (zebrafish);	PF13561	Enoyl-(Acyl carrier protein) reductase	Q	KOG0725	Reductases with broad range of substrate specificities
F02_transcript_22779	coq6, zgc:153379; coenzyme Q6 monooxygenase (EC:1.14.13.-); K06126 ubiquinone biosynthesis monooxygenase Coq6 [EC:1.14.13.-] (A)	53.184	8.8	4	4	4	0.934	0.894	0.88	1.199	1.08	1.043	1.227	0.011177	mitochondria	GO:0006732 coenzyme metabolic process; GO:0006733 oxidoreduction coenzyme metabolic process; GO:0006743 ubiquinone metabolic process; GO:0006744 ubiquinone biosynthetic process; GO:0008152 metabolic process; GO:0009058 biosynthetic process; GO:0009108 coenzyme biosynthetic process; GO:0009987 cellular process; GO:0042180 cellular ketone metabolic process; GO:0042181 ketone biosynthetic process; G…	GO:0005622 intracellular; GO:0005623 cell; GO:0005737 cytoplasm; GO:0005739 mitochondrion; GO:0043226 organelle; GO:0043227 membrane-bounded organelle; GO:0043229 intracellular organelle; GO:0043231 intracellular membrane-bounded organelle; GO:0044424 intracellular part; GO:0044444 cytoplasmic part; GO:0044464 cell part;		K06126	COQ6; ubiquinone biosynthesis monooxygenase Coq6 [EC:1.14.13.-]	dre00130 Ubiquinone and other terpenoid-quinone biosynthesis - Danio rerio (zebrafish); dre01100 Metabolic pathways - Danio rerio (zebrafish);			CH	KOG3855	Monooxygenase involved in coenzyme Q (ubiquinone) biosynthesis
F02_transcript_23055	nuclear pore complex protein Nup54-like; K14308 nuclear pore complex protein Nup54 (A)	54.98	7	3	3	3	0.932	0.839	0.935	1.221	1.024	1.076	1.227	0.032599	cytoplasm	GO:0000003 reproduction; GO:0000132 establishment of mitotic spindle orientation; GO:0000226 microtubule cytoskeleton organization; GO:0000278 mitotic cell cycle; GO:0003006 developmental process involved in reproduction; GO:0006403 RNA localization; GO:0006405 RNA export from nucleus; GO:0006406 mRNA export from nucleus; GO:0006605 protein targeting; GO:0006606 protein import into nucleus; GO:00…	GO:0005622 intracellular; GO:0005623 cell; GO:0005634 nucleus; GO:0005635 nuclear envelope; GO:0005643 nuclear pore; GO:0012505 endomembrane system; GO:0031967 organelle envelope; GO:0031975 envelope; GO:0032991 macromolecular complex; GO:0043226 organelle; GO:0043227 membrane-bounded organelle; GO:0043229 intracellular organelle; GO:0043231 intracellular membrane-bounded organelle; GO:0044422 or…	GO:0005198 structural molecule activity; GO:0005488 binding; GO:0005515 protein binding; GO:0005516 calmodulin binding; GO:0017056 structural constituent of nuclear pore;	K14308	NUP54, NUP57; nuclear pore complex protein Nup54	dre03013 RNA transport - Danio rerio (zebrafish);	PF13874	Nucleoporin complex subunit 54	UY	KOG3091	Nuclear pore complex, p54 component (sc Nup57)
F02_transcript_26785	C-reactive protein precursor [Canis lupus familiaris]	29.541	4.7	1	2	1	0.908	0.887	0.912	1.212	1.102	1.008	1.227	0.020004	extracellular							PF00354	Pentaxin family
F02_transcript_23382	calpain-2 catalytic subunit-like; K03853 calpain-2 [EC:3.4.22.53] (A)	44.289	26.6	9	14	4	0.89	0.812	0.958	1.065	1.138	1.059	1.226	0.0179365	nucleus	GO:0000003 reproduction; GO:0000768 syncytium formation by plasma membrane fusion; GO:0001667 ameboidal-type cell migration; GO:0002064 epithelial cell development; GO:0002065 columnar/cuboidal epithelial cell differentiation; GO:0002066 columnar/cuboidal epithelial cell development; GO:0003002 regionalization; GO:0003006 developmental process involved in reproduction; GO:0006355 regulation of tr…	GO:0005622 intracellular; GO:0005623 cell; GO:0005737 cytoplasm; GO:0005856 cytoskeleton; GO:0015629 actin cytoskeleton; GO:0036477 somatodendritic compartment; GO:0043025 neuronal cell body; GO:0043226 organelle; GO:0043228 non-membrane-bounded organelle; GO:0043229 intracellular organelle; GO:0043232 intracellular non-membrane-bounded organelle; GO:0044297 cell body; GO:0044424 intracellular pa…	GO:0003824 catalytic activity; GO:0004175 endopeptidase activity; GO:0004197 cysteine-type endopeptidase activity; GO:0004198 calcium-dependent cysteine-type endopeptidase activity; GO:0005488 binding; GO:0005509 calcium ion binding; GO:0008233 peptidase activity; GO:0008234 cysteine-type peptidase activity; GO:0016787 hydrolase activity; GO:0043167 ion binding; GO:0043169 cation binding; GO:0046…						OT	KOG0045	Cytosolic Ca2+-dependent cysteine protease (calpain), large subunit (EF-Hand protein superfamily)
F02_transcript_22309	LAP3; leucine aminopeptidase 3; K11142 cytosol aminopeptidase [EC:3.4.11.1 3.4.11.5] (A)	27.038	6	1	1	1	0.957	0.836	0.918	0.99	0.863	1.469	1.225	0.33828	extracellular	GO:0006508 proteolysis; GO:0006807 nitrogen compound metabolic process; GO:0007275 multicellular organism development; GO:0007399 nervous system development; GO:0007417 central nervous system development; GO:0007420 brain development; GO:0008152 metabolic process; GO:0016319 mushroom body development; GO:0019538 protein metabolic process; GO:0032501 multicellular organismal process; GO:0032502 de…	GO:0005622 intracellular; GO:0005623 cell; GO:0005634 nucleus; GO:0005654 nucleoplasm; GO:0005737 cytoplasm; GO:0005739 mitochondrion; GO:0005794 Golgi apparatus; GO:0005802 trans-Golgi network; GO:0005829 cytosol; GO:0012505 endomembrane system; GO:0030496 midbody; GO:0031974 membrane-enclosed lumen; GO:0031981 nuclear lumen; GO:0031984 organelle subcompartment; GO:0043226 organelle; GO:0043227 …	GO:0003824 catalytic activity; GO:0004177 aminopeptidase activity; GO:0005488 binding; GO:0005515 protein binding; GO:0008233 peptidase activity; GO:0008235 metalloexopeptidase activity; GO:0008237 metallopeptidase activity; GO:0008238 exopeptidase activity; GO:0016787 hydrolase activity; GO:0019904 protein domain specific binding; GO:0070011 peptidase activity, acting on L-amino acid peptides; G…	K11142	LAP3; cytosol aminopeptidase [EC:3.4.11.1 3.4.11.5]	dre00330 Arginine and proline metabolism - Danio rerio (zebrafish); dre00480 Glutathione metabolism - Danio rerio (zebrafish); dre01100 Metabolic pathways - Danio rerio (zebrafish);	PF02789; PF00883	Cytosol aminopeptidase family, N-terminal domain; Cytosol aminopeptidase family, catalytic domain	E	KOG2597	Predicted aminopeptidase of the M17 family
F02_transcript_6455	116 kDa U5 small nuclear ribonucleoprotein component-like; K12852 116 kDa U5 small nuclear ribonucleoprotein component (A)	109.02	12.4	10	14	10	0.915	0.863	0.904	1.031	1.073	1.181	1.225	0.010245	nucleus	GO:0000375 RNA splicing, via transesterification reactions; GO:0000377 RNA splicing, via transesterification reactions with bulged adenosine as nucleophile; GO:0000398 mRNA splicing, via spliceosome; GO:0006139 nucleobase-containing compound metabolic process; GO:0006396 RNA processing; GO:0006397 mRNA processing; GO:0006412 translation; GO:0006414 translational elongation; GO:0006518 peptide met…	GO:0005622 intracellular; GO:0005623 cell; GO:0005634 nucleus; GO:0005682 U5 snRNP; GO:0005737 cytoplasm; GO:0005829 cytosol; GO:0030532 small nuclear ribonucleoprotein complex; GO:0032991 macromolecular complex; GO:0043226 organelle; GO:0043227 membrane-bounded organelle; GO:0043229 intracellular organelle; GO:0043231 intracellular membrane-bounded organelle; GO:0044422 organelle part; GO:004442…	GO:0003676 nucleic acid binding; GO:0003723 RNA binding; GO:0003746 translation elongation factor activity; GO:0005488 binding; GO:0008135 translation factor activity, RNA binding; GO:0097159 organic cyclic compound binding; GO:1901363 heterocyclic compound binding;	K12852	EFTUD2; 116 kDa U5 small nuclear ribonucleoprotein component	dre03040 Spliceosome - Danio rerio (zebrafish);	PF00009; PF03144; PF03764; PF00679	Elongation factor Tu GTP binding domain; Elongation factor Tu domain 2; Elongation factor G, domain IV; Elongation factor G C-terminus	J	KOG0468	U5 snRNP-specific protein
F02_transcript_16455	alpha-N-acetylgalactosaminidase-like; K01204 alpha-N-acetylgalactosaminidase [EC:3.2.1.49] (A)	49.218	9.8	5	13	5	0.916	0.855	0.885	1.133	1.077	1.04	1.224	0.0031827	endoplasmic reticulum	GO:0005975 carbohydrate metabolic process; GO:0006629 lipid metabolic process; GO:0006643 membrane lipid metabolic process; GO:0006664 glycolipid metabolic process; GO:0006665 sphingolipid metabolic process; GO:0006672 ceramide metabolic process; GO:0006677 glycosylceramide metabolic process; GO:0006687 glycosphingolipid metabolic process; GO:0006807 nitrogen compound metabolic process; GO:000815…	GO:0000323 lytic vacuole; GO:0005622 intracellular; GO:0005623 cell; GO:0005737 cytoplasm; GO:0005764 lysosome; GO:0005773 vacuole; GO:0043226 organelle; GO:0043227 membrane-bounded organelle; GO:0043229 intracellular organelle; GO:0043231 intracellular membrane-bounded organelle; GO:0044424 intracellular part; GO:0044444 cytoplasmic part; GO:0044464 cell part;	GO:0003824 catalytic activity; GO:0004553 hydrolase activity, hydrolyzing O-glycosyl compounds; GO:0004557 alpha-galactosidase activity; GO:0005488 binding; GO:0005515 protein binding; GO:0008456 alpha-N-acetylgalactosaminidase activity; GO:0015925 galactosidase activity; GO:0015929 hexosaminidase activity; GO:0016787 hydrolase activity; GO:0016798 hydrolase activity, acting on glycosyl bonds; GO…	K01204	NAGA; alpha-N-acetylgalactosaminidase [EC:3.2.1.49]	dre00603 Glycosphingolipid biosynthesis - globo and isoglobo series - Danio rerio (zebrafish); dre01100 Metabolic pathways - Danio rerio (zebrafish); dre04142 Lysosome - Danio rerio (zebrafish);			G	KOG2366	Alpha-D-galactosidase (melibiase)
F02_transcript_9609	Ras-related protein Rab-3 [Stylophora pistillata]	24.669	24.4	5	8	3	0.941	0.938	0.852	1.105	1.092	1.139	1.222	0.0045219	cytoplasm	GO:0001775 cell activation; GO:0001894 tissue homeostasis; GO:0002252 immune effector process; GO:0002263 cell activation involved in immune response; GO:0002274 myeloid leukocyte activation; GO:0002275 myeloid cell activation involved in immune response; GO:0002283 neutrophil activation involved in immune response; GO:0002366 leukocyte activation involved in immune response; GO:0002376 immune sy…	GO:0000323 lytic vacuole; GO:0005622 intracellular; GO:0005623 cell; GO:0005737 cytoplasm; GO:0005764 lysosome; GO:0005765 lysosomal membrane; GO:0005766 primary lysosome; GO:0005773 vacuole; GO:0005774 vacuolar membrane; GO:0005856 cytoskeleton; GO:0005874 microtubule; GO:0005881 cytoplasmic microtubule; GO:0005886 plasma membrane; GO:0012505 endomembrane system; GO:0012506 vesicle membrane; GO:…	GO:0003824 catalytic activity; GO:0003924 GTPase activity; GO:0005488 binding; GO:0005515 protein binding; GO:0008092 cytoskeletal protein binding; GO:0016462 pyrophosphatase activity; GO:0016787 hydrolase activity; GO:0016817 hydrolase activity, acting on acid anhydrides; GO:0016818 hydrolase activity, acting on acid anhydrides, in phosphorus-containing anhydrides; GO:0017022 myosin binding; GO:…				PF00071	Ras family	U	KOG0093	GTPase Rab3, small G protein superfamily
F02_transcript_29380	proteasome subunit beta type-3-like; K02735 20S proteasome subunit beta 3 [EC:3.4.25.1] (A)	23.075	36.1	8	17	8	0.925	0.863	0.892	1.105	1.112	1.059	1.222	0.0013429	cytoplasm	GO:0006464 cellular protein modification process; GO:0006508 proteolysis; GO:0006511 ubiquitin-dependent protein catabolic process; GO:0006807 nitrogen compound metabolic process; GO:0008152 metabolic process; GO:0009056 catabolic process; GO:0009057 macromolecule catabolic process; GO:0009987 cellular process; GO:0010498 proteasomal protein catabolic process; GO:0016579 protein deubiquitination;…	GO:0000502 proteasome complex; GO:0005622 intracellular; GO:0005623 cell; GO:0005634 nucleus; GO:0005654 nucleoplasm; GO:0005737 cytoplasm; GO:0005829 cytosol; GO:0005839 proteasome core complex; GO:0019774 proteasome core complex, beta-subunit complex; GO:0031974 membrane-enclosed lumen; GO:0031981 nuclear lumen; GO:0032991 macromolecular complex; GO:0043226 organelle; GO:0043227 membrane-bounde…	GO:0003824 catalytic activity; GO:0004175 endopeptidase activity; GO:0005488 binding; GO:0005515 protein binding; GO:0008233 peptidase activity; GO:0016787 hydrolase activity; GO:0070011 peptidase activity, acting on L-amino acid peptides;	K02735	PSMB3; 20S proteasome subunit beta 3 [EC:3.4.25.1]	dre03050 Proteasome - Danio rerio (zebrafish);	PF00227	Proteasome subunit	O	KOG0180	20S proteasome, regulatory subunit beta type PSMB3/PUP3
F02_transcript_24884	Protein LZIC [Stylophora pistillata]	21.553	36.8	8	12	8	0.918	0.907	0.951	1.108	1.147	1.136	1.222	0.0003387	cytoplasm	GO:0007275 multicellular organism development; GO:0007399 nervous system development; GO:0007417 central nervous system development; GO:0009314 response to radiation; GO:0009628 response to abiotic stimulus; GO:0010212 response to ionizing radiation; GO:0032501 multicellular organismal process; GO:0032502 developmental process; GO:0048731 system development; GO:0048856 anatomical structure develo…
F02_transcript_8731	Rho guanine nucleotide exchange factor 26, partial [Stegodyphus mimosarum]	78.074	20	10	12	5	0.893	0.898	0.957	1.128	1.134	1.096	1.222	0.0012221	nucleus	GO:0001505 regulation of neurotransmitter levels; GO:0002009 morphogenesis of an epithelium; GO:0002165 instar larval or pupal development; GO:0002252 immune effector process; GO:0002376 immune system process; GO:0006582 melanin metabolic process; GO:0006725 cellular aromatic compound metabolic process; GO:0006928 movement of cell or subcellular component; GO:0006935 chemotaxis; GO:0006950 respon…	GO:0005622 intracellular; GO:0005623 cell; GO:0005737 cytoplasm; GO:0005829 cytosol; GO:0031594 neuromuscular junction; GO:0044424 intracellular part; GO:0044444 cytoplasmic part; GO:0044464 cell part; GO:0045202 synapse;	GO:0005085 guanyl-nucleotide exchange factor activity; GO:0005088 Ras guanyl-nucleotide exchange factor activity; GO:0005089 Rho guanyl-nucleotide exchange factor activity; GO:0005102 receptor binding; GO:0005488 binding; GO:0005515 protein binding; GO:0017016 Ras GTPase binding; GO:0017048 Rho GTPase binding; GO:0019899 enzyme binding; GO:0019900 kinase binding; GO:0019901 protein kinase binding…	K20688	ARHGEF16; Rho guanine nucleotide exchange factor 16		PF00621; PF00169; PF00018	RhoGEF domain; PH domain; SH3 domain	T	KOG3523	Putative guanine nucleotide exchange factor TIM
F02_transcript_24424	atox1; antioxidant 1 copper chaperone (EC:6.2.1.2); K07213 copper chaperone (A)	7.3605	65.7	5	7	5	0.921	0.91	0.873	1.074	1.159	1.07	1.222	0.0028763	cytoplasm	GO:0000041 transition metal ion transport; GO:0006810 transport; GO:0006811 ion transport; GO:0006812 cation transport; GO:0006825 copper ion transport; GO:0006873 cellular ion homeostasis; GO:0006875 cellular metal ion homeostasis; GO:0006878 cellular copper ion homeostasis; GO:0006950 response to stress; GO:0006979 response to oxidative stress; GO:0009987 cellular process; GO:0015680 intracellu…	GO:0005622 intracellular; GO:0005623 cell; GO:0005737 cytoplasm; GO:0005829 cytosol; GO:0044424 intracellular part; GO:0044444 cytoplasmic part; GO:0044464 cell part;	GO:0005215 transporter activity; GO:0005375 copper ion transmembrane transporter activity; GO:0005488 binding; GO:0005507 copper ion binding; GO:0005515 protein binding; GO:0008324 cation transmembrane transporter activity; GO:0015075 ion transmembrane transporter activity; GO:0015318 inorganic solute uptake transmembrane transporter activity; GO:0016530 metallochaperone activity; GO:0016531 copp…	K07213	ATOX1, ATX1, copZ, golB; copper chaperone		PF00403	Heavy-metal-associated domain	P	KOG1603	Copper chaperone
F02_transcript_15636	elongation of very long chain fatty acids protein 7-like; K10250 elongation of very long chain fatty acids protein 7 [EC:2.3.1.199] (A)	33.066	5.3	2	2	2	0.841	0.765	1.105	1.259	1.011	1.042	1.222	0.184702	plasma membrane	GO:0000038 very long-chain fatty acid metabolic process; GO:0006082 organic acid metabolic process; GO:0006629 lipid metabolic process; GO:0006631 fatty acid metabolic process; GO:0006633 fatty acid biosynthetic process; GO:0006643 membrane lipid metabolic process; GO:0006665 sphingolipid metabolic process; GO:0006807 nitrogen compound metabolic process; GO:0008152 metabolic process; GO:0008610 l…	GO:0005622 intracellular; GO:0005623 cell; GO:0005737 cytoplasm; GO:0005783 endoplasmic reticulum; GO:0005789 endoplasmic reticulum membrane; GO:0012505 endomembrane system; GO:0016020 membrane; GO:0016021 integral component of membrane; GO:0030176 integral component of endoplasmic reticulum membrane; GO:0031224 intrinsic component of membrane; GO:0031227 intrinsic component of endoplasmic reticu…	GO:0003824 catalytic activity; GO:0004312 fatty acid synthase activity; GO:0009922 fatty acid elongase activity; GO:0016740 transferase activity; GO:0016746 transferase activity, transferring acyl groups; GO:0016747 transferase activity, transferring acyl groups other than amino-acyl groups;	K10250	ELOVL7; elongation of very long chain fatty acids protein 7 [EC:2.3.1.199]	dre00062 Fatty acid elongation - Danio rerio (zebrafish); dre01040 Biosynthesis of unsaturated fatty acids - Danio rerio (zebrafish); dre01100 Metabolic pathways - Danio rerio (zebrafish); dre01212 Fatty acid metabolism - Danio rerio (zebrafish);			I	KOG3071	Fatty acyl-CoA elongase/Polyunsaturated fatty acid specific elongation enzyme
F02_transcript_21592	Uncharacterized protein	32.824	15	3	6	3	0.883	0.99	0.866	1.161	1.11	1.074	1.221	0.0132823	extracellular							PF07686	Immunoglobulin V-set domain
F02_transcript_25178	cpvl, cb1084, wu:fb69d02; carboxypeptidase, vitellogenic-like (EC:3.4.16.-); K09645 vitellogenic carboxypeptidase-like protein [EC:3.4.16.-] (A)	35.232	14.9	4	8	4	0.968	0.949	0.874	1.095	1.139	1.171	1.22	0.0056404	cytoskeleton	GO:0006403 RNA localization; GO:0006508 proteolysis; GO:0006807 nitrogen compound metabolic process; GO:0006810 transport; GO:0008152 metabolic process; GO:0009056 catabolic process; GO:0009057 macromolecule catabolic process; GO:0009987 cellular process; GO:0015931 nucleobase-containing compound transport; GO:0019538 protein metabolic process; GO:0030163 protein catabolic process; GO:0033036 mac…		GO:0003824 catalytic activity; GO:0004180 carboxypeptidase activity; GO:0004185 serine-type carboxypeptidase activity; GO:0008233 peptidase activity; GO:0008236 serine-type peptidase activity; GO:0008238 exopeptidase activity; GO:0016787 hydrolase activity; GO:0017171 serine hydrolase activity; GO:0070008 serine-type exopeptidase activity; GO:0070011 peptidase activity, acting on L-amino acid pep…	K09645	CPVL; vitellogenic carboxypeptidase-like protein [EC:3.4.16.-]		PF00450	Serine carboxypeptidase	EO	KOG1282	Serine carboxypeptidases (lysosomal cathepsin A)
F02_transcript_705	cullin-4B-like; K10609 cullin 4 (A)	99.045	9.4	7	7	1	0.85	0.783	1.087	1.003	1.272	1.042	1.219	0.174639	cytoplasm	GO:0000003 reproduction; GO:0000082 G1/S transition of mitotic cell cycle; GO:0000278 mitotic cell cycle; GO:0000715 nucleotide-excision repair, DNA damage recognition; GO:0002064 epithelial cell development; GO:0002065 columnar/cuboidal epithelial cell differentiation; GO:0002066 columnar/cuboidal epithelial cell development; GO:0003006 developmental process involved in reproduction; GO:0006139 …	GO:0000151 ubiquitin ligase complex; GO:0005622 intracellular; GO:0005623 cell; GO:0005634 nucleus; GO:0005654 nucleoplasm; GO:0005737 cytoplasm; GO:0005829 cytosol; GO:0031461 cullin-RING ubiquitin ligase complex; GO:0031465 Cul4B-RING E3 ubiquitin ligase complex; GO:0031974 membrane-enclosed lumen; GO:0031981 nuclear lumen; GO:0032991 macromolecular complex; GO:0043226 organelle; GO:0043227 mem…	GO:0005488 binding; GO:0005515 protein binding; GO:0019899 enzyme binding; GO:0031625 ubiquitin protein ligase binding; GO:0044389 ubiquitin-like protein ligase binding;	K10609	CUL4; cullin 4	dre03420 Nucleotide excision repair - Danio rerio (zebrafish); dre04120 Ubiquitin mediated proteolysis - Danio rerio (zebrafish);	PF10557	Cullin protein neddylation domain	D	KOG2167	Cullins
F02_transcript_10562	SPAM1; sperm adhesion molecule 1 (PH-20 hyaluronidase, zona pellucida binding); K01197 hyaluronoglucosaminidase [EC:3.2.1.35] (A)	54.943	5.9	3	8	3	0.959	0.821	0.891	1.03	1.099	1.127	1.219	0.0188806	plasma membrane	GO:0000003 reproduction; GO:0005975 carbohydrate metabolic process; GO:0007338 single fertilization; GO:0007339 binding of sperm to zona pellucida; GO:0007341 penetration of zona pellucida; GO:0008037 cell recognition; GO:0008152 metabolic process; GO:0009566 fertilization; GO:0009987 cellular process; GO:0009988 cell-cell recognition; GO:0019953 sexual reproduction; GO:0022414 reproductive proce…	GO:0001669 acrosomal vesicle; GO:0002079 inner acrosomal membrane; GO:0002080 acrosomal membrane; GO:0005622 intracellular; GO:0005623 cell; GO:0005737 cytoplasm; GO:0005886 plasma membrane; GO:0009897 external side of plasma membrane; GO:0009986 cell surface; GO:0012505 endomembrane system; GO:0012506 vesicle membrane; GO:0016020 membrane; GO:0030141 secretory granule; GO:0030659 cytoplasmic ves…	GO:0003824 catalytic activity; GO:0004415 hyalurononglucosaminidase activity; GO:0004553 hydrolase activity, hydrolyzing O-glycosyl compounds; GO:0015929 hexosaminidase activity; GO:0016787 hydrolase activity; GO:0016798 hydrolase activity, acting on glycosyl bonds;	K01197	hya; hyaluronoglucosaminidase [EC:3.2.1.35]	dre00531 Glycosaminoglycan degradation - Danio rerio (zebrafish); dre01100 Metabolic pathways - Danio rerio (zebrafish);	PF01630	Hyaluronidase
F02_transcript_10009	aspartate--tRNA ligase, mitochondrial-like; K01876 aspartyl-tRNA synthetase [EC:6.1.1.12] (A)	74.349	9	5	6	5	0.881	0.914	0.887	1.054	1.045	1.17	1.219	0.0066413	mitochondria	GO:0000959 mitochondrial RNA metabolic process; GO:0006082 organic acid metabolic process; GO:0006139 nucleobase-containing compound metabolic process; GO:0006399 tRNA metabolic process; GO:0006412 translation; GO:0006418 tRNA aminoacylation for protein translation; GO:0006421 asparaginyl-tRNA aminoacylation; GO:0006422 aspartyl-tRNA aminoacylation; GO:0006518 peptide metabolic process; GO:000652…	GO:0005622 intracellular; GO:0005623 cell; GO:0005634 nucleus; GO:0005737 cytoplasm; GO:0005739 mitochondrion; GO:0005759 mitochondrial matrix; GO:0031974 membrane-enclosed lumen; GO:0043226 organelle; GO:0043227 membrane-bounded organelle; GO:0043229 intracellular organelle; GO:0043231 intracellular membrane-bounded organelle; GO:0043233 organelle lumen; GO:0044422 organelle part; GO:0044424 int…	GO:0000049 tRNA binding; GO:0000166 nucleotide binding; GO:0003676 nucleic acid binding; GO:0003723 RNA binding; GO:0003824 catalytic activity; GO:0004812 aminoacyl-tRNA ligase activity; GO:0004815 aspartate-tRNA ligase activity; GO:0005488 binding; GO:0005515 protein binding; GO:0005524 ATP binding; GO:0008144 drug binding; GO:0016874 ligase activity; GO:0016875 ligase activity, forming carbon-o…	K01876	DARS, aspS; aspartyl-tRNA synthetase [EC:6.1.1.12]	dre00970 Aminoacyl-tRNA biosynthesis - Danio rerio (zebrafish);	PF00152; PF02938	tRNA synthetases class II (D, K and N) ; GAD domain	J	KOG2411	Aspartyl-tRNA synthetase, mitochondrial
F02_transcript_3486	anoctamin-7-like isoform X2 [Stylophora pistillata]	103.53	22.4	17	25	17	0.956	0.893	0.879	1.1	1.207	1.019	1.219	0.023763	plasma membrane				K19501	ANO7, NGEP, TMEM16G; anoctamin-7				S	KOG2514	Uncharacterized conserved protein
F02_transcript_23598	fatty aldehyde dehydrogenase-like; K00128 aldehyde dehydrogenase (NAD+) [EC:1.2.1.3] (A)	54.9	28.6	11	15	11	0.904	0.907	0.911	1.123	1.097	1.092	1.217	2.2855e-05	cytoplasm	GO:0000302 response to reactive oxygen species; GO:0001561 fatty acid alpha-oxidation; GO:0001666 response to hypoxia; GO:0006066 alcohol metabolic process; GO:0006081 cellular aldehyde metabolic process; GO:0006082 organic acid metabolic process; GO:0006629 lipid metabolic process; GO:0006631 fatty acid metabolic process; GO:0006643 membrane lipid metabolic process; GO:0006665 sphingolipid metab…	GO:0005622 intracellular; GO:0005623 cell; GO:0005634 nucleus; GO:0005737 cytoplasm; GO:0005777 peroxisome; GO:0005778 peroxisomal membrane; GO:0005783 endoplasmic reticulum; GO:0005789 endoplasmic reticulum membrane; GO:0005829 cytosol; GO:0005886 plasma membrane; GO:0012505 endomembrane system; GO:0016020 membrane; GO:0016021 integral component of membrane; GO:0019898 extrinsic component of mem…	GO:0003824 catalytic activity; GO:0004028 3-chloroallyl aldehyde dehydrogenase activity; GO:0004029 aldehyde dehydrogenase (NAD) activity; GO:0004030 aldehyde dehydrogenase [NAD(P)+] activity; GO:0004033 aldo-keto reductase (NADP) activity; GO:0005488 binding; GO:0005515 protein binding; GO:0008106 alcohol dehydrogenase (NADP+) activity; GO:0016491 oxidoreductase activity; GO:0016614 oxidoreducta…	K00128	ALDH; aldehyde dehydrogenase (NAD+) [EC:1.2.1.3]	dre00010 Glycolysis / Gluconeogenesis - Danio rerio (zebrafish); dre00053 Ascorbate and aldarate metabolism - Danio rerio (zebrafish); dre00071 Fatty acid degradation - Danio rerio (zebrafish); dre00280 Valine, leucine and isoleucine degradation - Danio rerio (zebrafish); dre00310 Lysine degradation - Danio rerio (zebrafish); dre00330 Arginine and proline metabolism - Danio rerio (zebrafish); dre…			C	KOG2456	Aldehyde dehydrogenase
F02_transcript_30006	cytochrome c oxidase subunit 5B, mitochondrial-like; K02265 cytochrome c oxidase subunit 5b (A)	14.515	24.8	3	4	2	0.857	0.944	0.919	1.114	1.068	1.126	1.216	0.0040211	mitochondria				K02265	COX5B; cytochrome c oxidase subunit 5b	dre00190 Oxidative phosphorylation - Danio rerio (zebrafish); dre01100 Metabolic pathways - Danio rerio (zebrafish); dre04260 Cardiac muscle contraction - Danio rerio (zebrafish);	PF01215	Cytochrome c oxidase subunit Vb	C	KOG3352	Cytochrome c oxidase, subunit Vb/COX4
F02_transcript_12335	protein SSUH2 homolog, partial [Stylophora pistillata]	40.896	31.1	9	17	9	0.944	0.876	0.936	1.086	1.193	1.07	1.215	0.0094045	extracellular	GO:0007275 multicellular organism development; GO:0009653 anatomical structure morphogenesis; GO:0009887 animal organ morphogenesis; GO:0032501 multicellular organismal process; GO:0032502 developmental process; GO:0042476 odontogenesis; GO:0048513 animal organ development; GO:0048731 system development; GO:0048856 anatomical structure development;	GO:0005622 intracellular; GO:0005623 cell; GO:0005634 nucleus; GO:0043226 organelle; GO:0043227 membrane-bounded organelle; GO:0043229 intracellular organelle; GO:0043231 intracellular membrane-bounded organelle; GO:0044424 intracellular part; GO:0044464 cell part;							O	KOG2813	Predicted molecular chaperone, contains DnaJ domain
F02_transcript_11028	glud1b, cb719, glud1, wu:fb16e02, wu:fb58f12, wu:fe37f03, wu:fj43f02, zgc:192851, zgc:55630; glutamate dehydrogenase 1b (EC:1.4.1.3); K00261 glutamate dehydrogenase (NAD(P)+) [EC:1.4.1.3] (A)	39.444	35.1	12	34	6	0.91	0.91	0.902	1.109	1.117	1.08	1.215	5.6631e-05	mitochondria	GO:0002791 regulation of peptide secretion; GO:0002793 positive regulation of peptide secretion; GO:0003008 system process; GO:0006082 organic acid metabolic process; GO:0006103 2-oxoglutarate metabolic process; GO:0006106 fumarate metabolic process; GO:0006116 NADH oxidation; GO:0006139 nucleobase-containing compound metabolic process; GO:0006520 cellular amino acid metabolic process; GO:0006536…	GO:0005622 intracellular; GO:0005623 cell; GO:0005737 cytoplasm; GO:0005739 mitochondrion; GO:0005740 mitochondrial envelope; GO:0005743 mitochondrial inner membrane; GO:0005759 mitochondrial matrix; GO:0016020 membrane; GO:0019866 organelle inner membrane; GO:0031090 organelle membrane; GO:0031966 mitochondrial membrane; GO:0031967 organelle envelope; GO:0031974 membrane-enclosed lumen; GO:00319…	GO:0000166 nucleotide binding; GO:0001882 nucleoside binding; GO:0001883 purine nucleoside binding; GO:0003824 catalytic activity; GO:0004352 glutamate dehydrogenase (NAD+) activity; GO:0004353 glutamate dehydrogenase [NAD(P)+] activity; GO:0005488 binding; GO:0005515 protein binding; GO:0005525 GTP binding; GO:0016491 oxidoreductase activity; GO:0016597 amino acid binding; GO:0016638 oxidoreduct…	K00261	GLUD1_2, gdhA; glutamate dehydrogenase (NAD(P)+) [EC:1.4.1.3]	dre00220 Arginine biosynthesis - Danio rerio (zebrafish); dre00250 Alanine, aspartate and glutamate metabolism - Danio rerio (zebrafish); dre00471 D-Glutamine and D-glutamate metabolism - Danio rerio (zebrafish); dre00910 Nitrogen metabolism - Danio rerio (zebrafish); dre01100 Metabolic pathways - Danio rerio (zebrafish); dre01200 Carbon metabolism - Danio rerio (zebrafish); dre04217 Necroptosis …	PF02812; PF00208	Glu/Leu/Phe/Val dehydrogenase, dimerisation domain; Glutamate/Leucine/Phenylalanine/Valine dehydrogenase	E	KOG2250	Glutamate/leucine/phenylalanine/valine dehydrogenases
F02_transcript_9379	protein-arginine deiminase type-2-like; K01481 protein-arginine deiminase [EC:3.5.3.15] (A)	60.39	35.3	17	41	1	0.902	0.953	0.868	1.132	1.091	1.085	1.215	0.0029567	cytoplasm	GO:0001672 regulation of chromatin assembly or disassembly; GO:0001775 cell activation; GO:0001959 regulation of cytokine-mediated signaling pathway; GO:0001960 negative regulation of cytokine-mediated signaling pathway; GO:0002252 immune effector process; GO:0002263 cell activation involved in immune response; GO:0002274 myeloid leukocyte activation; GO:0002275 myeloid cell activation involved i…	GO:0000323 lytic vacuole; GO:0000785 chromatin; GO:0005576 extracellular region; GO:0005622 intracellular; GO:0005623 cell; GO:0005634 nucleus; GO:0005654 nucleoplasm; GO:0005694 chromosome; GO:0005737 cytoplasm; GO:0005764 lysosome; GO:0005766 primary lysosome; GO:0005773 vacuole; GO:0005775 vacuolar lumen; GO:0005829 cytosol; GO:0012505 endomembrane system; GO:0030141 secretory granule; GO:0031…	GO:0003824 catalytic activity; GO:0004668 protein-arginine deiminase activity; GO:0005102 receptor binding; GO:0005488 binding; GO:0005509 calcium ion binding; GO:0005515 protein binding; GO:0008134 transcription factor binding; GO:0016597 amino acid binding; GO:0016787 hydrolase activity; GO:0016810 hydrolase activity, acting on carbon-nitrogen (but not peptide) bonds; GO:0016813 hydrolase activ…	K01481	E3.5.3.15; protein-arginine deiminase [EC:3.5.3.15]		PF08526; PF08527	Protein-arginine deiminase (PAD) N-terminal domain; Protein-arginine deiminase (PAD) middle domain
F02_transcript_18114	UDP-N-acetylhexosamine pyrophosphorylase-like; K00972 UDP-N-acetylglucosamine/UDP-N-acetylgalactosamine diphosphorylase [EC:2.7.7.23 2.7.7.83] (A)	58.09	21.6	9	11	9	1.003	0.873	0.819	1.131	1.062	1.082	1.215	0.034102	cytoplasm	GO:0001700 embryonic development via the syncytial blastoderm; GO:0001838 embryonic epithelial tube formation; GO:0002009 morphogenesis of an epithelium; GO:0006022 aminoglycan metabolic process; GO:0006023 aminoglycan biosynthetic process; GO:0006030 chitin metabolic process; GO:0006031 chitin biosynthetic process; GO:0006034 cuticle chitin metabolic process; GO:0006035 cuticle chitin biosynthet…	GO:0005622 intracellular; GO:0005623 cell; GO:0005634 nucleus; GO:0005654 nucleoplasm; GO:0005737 cytoplasm; GO:0005829 cytosol; GO:0005886 plasma membrane; GO:0016020 membrane; GO:0031974 membrane-enclosed lumen; GO:0031981 nuclear lumen; GO:0043226 organelle; GO:0043227 membrane-bounded organelle; GO:0043229 intracellular organelle; GO:0043231 intracellular membrane-bounded organelle; GO:004323…	GO:0003824 catalytic activity; GO:0003977 UDP-N-acetylglucosamine diphosphorylase activity; GO:0005488 binding; GO:0005515 protein binding; GO:0016740 transferase activity; GO:0016772 transferase activity, transferring phosphorus-containing groups; GO:0016779 nucleotidyltransferase activity; GO:0030246 carbohydrate binding; GO:0042802 identical protein binding; GO:0070569 uridylyltransferase acti…	K00972	UAP1; UDP-N-acetylglucosamine/UDP-N-acetylgalactosamine diphosphorylase [EC:2.7.7.23 2.7.7.83]	dre00520 Amino sugar and nucleotide sugar metabolism - Danio rerio (zebrafish); dre01100 Metabolic pathways - Danio rerio (zebrafish);			M	KOG2388	UDP-N-acetylglucosamine pyrophosphorylase
F02_transcript_25447	ANP32B, hLAMP-1; acidic (leucine-rich) nuclear phosphoprotein 32 family, member B; K18647 acidic leucine-rich nuclear phosphoprotein 32 family member B (A)	29.222	6.2	3	4	2	0.72	0.851	1.15	1.172	1.15	0.98	1.214	0.23068	nucleus	GO:0006323 DNA packaging; GO:0006325 chromatin organization; GO:0006333 chromatin assembly or disassembly; GO:0006334 nucleosome assembly; GO:0006338 chromatin remodeling; GO:0006810 transport; GO:0006913 nucleocytoplasmic transport; GO:0006996 organelle organization; GO:0009987 cellular process; GO:0010941 regulation of cell death; GO:0016043 cellular component organization; GO:0022607 cellular …	GO:0005576 extracellular region; GO:0005622 intracellular; GO:0005623 cell; GO:0005634 nucleus; GO:0031012 extracellular matrix; GO:0043226 organelle; GO:0043227 membrane-bounded organelle; GO:0043229 intracellular organelle; GO:0043231 intracellular membrane-bounded organelle; GO:0044421 extracellular region part; GO:0044424 intracellular part; GO:0044464 cell part;	GO:0005488 binding; GO:0005515 protein binding; GO:0042393 histone binding; GO:0044877 macromolecular complex binding;	K18647	ANP32B; acidic leucine-rich nuclear phosphoprotein 32 family member B				D	KOG2739	Leucine-rich acidic nuclear protein
F02_transcript_27268	Epididymal secretory protein E1, partial [Stegodyphus mimosarum]	16.052	26.4	4	5	4	0.907	0.913	0.874	1.124	1.043	1.101	1.213	0.00179615	extracellular	GO:0001775 cell activation; GO:0002252 immune effector process; GO:0002263 cell activation involved in immune response; GO:0002274 myeloid leukocyte activation; GO:0002275 myeloid cell activation involved in immune response; GO:0002283 neutrophil activation involved in immune response; GO:0002366 leukocyte activation involved in immune response; GO:0002376 immune system process; GO:0002443 leukoc…	GO:0000323 lytic vacuole; GO:0005576 extracellular region; GO:0005622 intracellular; GO:0005623 cell; GO:0005737 cytoplasm; GO:0005764 lysosome; GO:0005766 primary lysosome; GO:0005773 vacuole; GO:0005775 vacuolar lumen; GO:0012505 endomembrane system; GO:0030141 secretory granule; GO:0031410 cytoplasmic vesicle; GO:0031974 membrane-enclosed lumen; GO:0031982 vesicle; GO:0031983 vesicle lumen; GO…	GO:0005215 transporter activity; GO:0005319 lipid transporter activity; GO:0005488 binding; GO:0005496 steroid binding; GO:0005515 protein binding; GO:0008289 lipid binding; GO:0015248 sterol transporter activity; GO:0015485 cholesterol binding; GO:0017127 cholesterol transporter activity; GO:0019899 enzyme binding; GO:0032934 sterol binding; GO:0036094 small molecule binding; GO:0043178 alcohol …				PF02221	ML domain	S	KOG4063	Major epididymal secretory protein HE1
F02_transcript_11280	kunitz-type protease inhibitor 1-like; K15619 Kunitz-type protease inhibitor 1 (A)	55.257	27.5	11	24	2	0.756	1.06	1.017	1.018	1.262	1.156	1.213	0.180224	plasma membrane	GO:0000003 reproduction; GO:0001568 blood vessel development; GO:0001701 in utero embryonic development; GO:0001763 morphogenesis of a branching structure; GO:0001838 embryonic epithelial tube formation; GO:0001841 neural tube formation; GO:0001843 neural tube closure; GO:0001890 placenta development; GO:0001892 embryonic placenta development; GO:0001944 vasculature development; GO:0002009 morpho…	GO:0005576 extracellular region; GO:0005623 cell; GO:0005886 plasma membrane; GO:0016020 membrane; GO:0044464 cell part; GO:0071944 cell periphery;	GO:0004857 enzyme inhibitor activity; GO:0004866 endopeptidase inhibitor activity; GO:0004867 serine-type endopeptidase inhibitor activity; GO:0030234 enzyme regulator activity; GO:0030414 peptidase inhibitor activity; GO:0061134 peptidase regulator activity; GO:0061135 endopeptidase regulator activity; GO:0098772 molecular function regulator;	K15619	SPINT1; Kunitz-type protease inhibitor 1		PF07502; PF00014	MANEC domain; Kunitz/Bovine pancreatic trypsin inhibitor domain	O	KOG4295	Serine proteinase inhibitor (KU family)
F02_transcript_23833	hars, im:7136719, zgc:92215; histidyl-tRNA synthetase (EC:6.1.1.21); K01892 histidyl-tRNA synthetase [EC:6.1.1.21] (A)	53.753	29.1	18	42	17	0.897	0.915	0.923	1.092	1.132	1.087	1.211	0.00024023	nucleus	GO:0000003 reproduction; GO:0000122 negative regulation of transcription from RNA polymerase II promoter; GO:0002119 nematode larval development; GO:0002164 larval development; GO:0003006 developmental process involved in reproduction; GO:0006082 organic acid metabolic process; GO:0006139 nucleobase-containing compound metabolic process; GO:0006355 regulation of transcription, DNA-templated; GO:0…	GO:0005622 intracellular; GO:0005623 cell; GO:0005737 cytoplasm; GO:0005739 mitochondrion; GO:0005829 cytosol; GO:0043226 organelle; GO:0043227 membrane-bounded organelle; GO:0043229 intracellular organelle; GO:0043231 intracellular membrane-bounded organelle; GO:0044424 intracellular part; GO:0044444 cytoplasmic part; GO:0044464 cell part;	GO:0003824 catalytic activity; GO:0004812 aminoacyl-tRNA ligase activity; GO:0004821 histidine-tRNA ligase activity; GO:0005488 binding; GO:0005515 protein binding; GO:0016874 ligase activity; GO:0016875 ligase activity, forming carbon-oxygen bonds; GO:0042802 identical protein binding; GO:0042803 protein homodimerization activity; GO:0046983 protein dimerization activity;	K01892	HARS, hisS; histidyl-tRNA synthetase [EC:6.1.1.21]	dre00970 Aminoacyl-tRNA biosynthesis - Danio rerio (zebrafish);	PF13393; PF03129	Histidyl-tRNA synthetase; Anticodon binding domain	J	KOG1936	Histidyl-tRNA synthetase
F02_transcript_21951	hnrnpd, wu:fa28b06, zgc:162951; heterogeneous nuclear ribonucleoprotein D; K13044 heterogeneous nuclear ribonucleoprotein A/B/D (A)	35.25	16.4	4	5	3	0.696	1.142	0.887	1.072	1.055	1.173	1.211	0.22428	nucleus	GO:0000291 nuclear-transcribed mRNA catabolic process, exonucleolytic; GO:0000302 response to reactive oxygen species; GO:0000375 RNA splicing, via transesterification reactions; GO:0000377 RNA splicing, via transesterification reactions with bulged adenosine as nucleophile; GO:0000398 mRNA splicing, via spliceosome; GO:0000956 nuclear-transcribed mRNA catabolic process; GO:0001101 response to ac…	GO:0005622 intracellular; GO:0005623 cell; GO:0005634 nucleus; GO:0005654 nucleoplasm; GO:0005737 cytoplasm; GO:0005829 cytosol; GO:0031974 membrane-enclosed lumen; GO:0031981 nuclear lumen; GO:0032991 macromolecular complex; GO:0043226 organelle; GO:0043227 membrane-bounded organelle; GO:0043229 intracellular organelle; GO:0043231 intracellular membrane-bounded organelle; GO:0043233 organelle lu…	GO:0003676 nucleic acid binding; GO:0003677 DNA binding; GO:0003680 AT DNA binding; GO:0003682 chromatin binding; GO:0003690 double-stranded DNA binding; GO:0003723 RNA binding; GO:0003729 mRNA binding; GO:0003730 mRNA 3'-UTR binding; GO:0005488 binding; GO:0005515 protein binding; GO:0008134 transcription factor binding; GO:0017091 AU-rich element binding; GO:0019899 enzyme binding; GO:0035925 m…	K13044	HNRNPABD; heterogeneous nuclear ribonucleoprotein A/B/D		PF08143; PF00076	CBFNT (NUC161) domain; RNA recognition motif. (a.k.a. RRM, RBD, or RNP domain)	A	KOG0118	FOG: RRM domain
F02_transcript_538	EF-hand domain-containing protein D2 [Stylophora pistillata]	26.304	34.6	7	9	7	0.871	0.946	0.89	1.036	1.139	1.1	1.21	0.0068556	cytoplasm	GO:0007498 mesoderm development; GO:0009888 tissue development; GO:0032502 developmental process; GO:0048856 anatomical structure development;	GO:0005623 cell; GO:0005886 plasma membrane; GO:0005912 adherens junction; GO:0005924 cell-substrate adherens junction; GO:0005927 muscle tendon junction; GO:0016020 membrane; GO:0030054 cell junction; GO:0030055 cell-substrate junction; GO:0044464 cell part; GO:0070161 anchoring junction; GO:0071944 cell periphery;	GO:0005488 binding; GO:0005509 calcium ion binding; GO:0043167 ion binding; GO:0043169 cation binding; GO:0046872 metal ion binding;				PF13499	EF-hand domain pair	S	KOG0041	Predicted Ca2+-binding protein, EF-Hand protein superfamily
F02_transcript_22806	clusterin-like; K17252 clusterin (A)	34.694	22.3	6	7	6	0.889	0.891	0.954	1.029	1.137	1.141	1.21	0.0098588	cytoplasm	GO:0000003 reproduction; GO:0000902 cell morphogenesis; GO:0001505 regulation of neurotransmitter levels; GO:0001774 microglial cell activation; GO:0001775 cell activation; GO:0001817 regulation of cytokine production; GO:0001819 positive regulation of cytokine production; GO:0001836 release of cytochrome c from mitochondria; GO:0001932 regulation of protein phosphorylation; GO:0001934 positive r…	GO:0005576 extracellular region; GO:0005615 extracellular space; GO:0005622 intracellular; GO:0005623 cell; GO:0005634 nucleus; GO:0005737 cytoplasm; GO:0005739 mitochondrion; GO:0005783 endoplasmic reticulum; GO:0005788 endoplasmic reticulum lumen; GO:0005794 Golgi apparatus; GO:0009986 cell surface; GO:0012505 endomembrane system; GO:0016234 inclusion body; GO:0016235 aggresome; GO:0030141 secr…	GO:0001540 beta-amyloid binding; GO:0005102 receptor binding; GO:0005488 binding; GO:0005515 protein binding; GO:0008092 cytoskeletal protein binding; GO:0019899 enzyme binding; GO:0031625 ubiquitin protein ligase binding; GO:0033218 amide binding; GO:0042277 peptide binding; GO:0044389 ubiquitin-like protein ligase binding; GO:0044877 macromolecular complex binding; GO:0046982 protein heterodime…	K17252	CLU; clusterin
F02_transcript_23613	SNX2; sorting nexin 2; K17917 sorting nexin-1/2 (A)	43.28	28	9	9	6	0.995	0.858	0.832	1.098	1.001	1.15	1.21	0.048903	cytoplasm	GO:0000902 cell morphogenesis; GO:0001845 phagolysosome assembly; GO:0006810 transport; GO:0006897 endocytosis; GO:0006906 vesicle fusion; GO:0006909 phagocytosis; GO:0006915 apoptotic process; GO:0006996 organelle organization; GO:0007033 vacuole organization; GO:0007040 lysosome organization; GO:0007610 behavior; GO:0007638 mechanosensory behavior; GO:0008104 protein localization; GO:0008219 ce…	GO:0000323 lytic vacuole; GO:0005622 intracellular; GO:0005623 cell; GO:0005737 cytoplasm; GO:0005764 lysosome; GO:0005768 endosome; GO:0005769 early endosome; GO:0005773 vacuole; GO:0010008 endosome membrane; GO:0012505 endomembrane system; GO:0016020 membrane; GO:0019898 extrinsic component of membrane; GO:0030027 lamellipodium; GO:0030139 endocytic vesicle; GO:0030904 retromer complex; GO:0030…	GO:0005102 receptor binding; GO:0005154 epidermal growth factor receptor binding; GO:0005158 insulin receptor binding; GO:0005488 binding; GO:0005515 protein binding; GO:0005543 phospholipid binding; GO:0005547 phosphatidylinositol-3,4,5-trisphosphate binding; GO:0008289 lipid binding; GO:0032266 phosphatidylinositol-3-phosphate binding; GO:0035091 phosphatidylinositol binding; GO:0042802 identic…	K17917	SNX1_2; sorting nexin-1/2	dre04144 Endocytosis - Danio rerio (zebrafish);	PF00787; PF09325	PX domain; Vps5 C terminal like	U	KOG2273	Membrane coat complex Retromer, subunit VPS5/SNX1, Sorting nexins, and related PX domain-containing proteins
F02_transcript_17800	Uncharacterized protein	17.692	16.9	2	4	2	0.865	0.847	1.021	0.88	1.155	1.269	1.209	0.21886	cytoplasm	GO:0001775 cell activation; GO:0002252 immune effector process; GO:0002263 cell activation involved in immune response; GO:0002274 myeloid leukocyte activation; GO:0002275 myeloid cell activation involved in immune response; GO:0002283 neutrophil activation involved in immune response; GO:0002366 leukocyte activation involved in immune response; GO:0002376 immune system process; GO:0002443 leukoc…	GO:0000323 lytic vacuole; GO:0005576 extracellular region; GO:0005622 intracellular; GO:0005623 cell; GO:0005737 cytoplasm; GO:0005764 lysosome; GO:0005766 primary lysosome; GO:0005773 vacuole; GO:0005775 vacuolar lumen; GO:0012505 endomembrane system; GO:0030141 secretory granule; GO:0031410 cytoplasmic vesicle; GO:0031974 membrane-enclosed lumen; GO:0031982 vesicle; GO:0031983 vesicle lumen; GO…		K11997	TRIM2_3; tripartite motif-containing protein 2/3				O	KOG2177	Predicted E3 ubiquitin ligase
F02_transcript_29711	heart fatty acid-binding protein [Bos taurus]	14.852	39.4	6	36	6	0.905	0.938	0.874	1.129	1.048	1.107	1.209	0.0032987	cytoplasm	GO:0001101 response to acid chemical; GO:0006082 organic acid metabolic process; GO:0006629 lipid metabolic process; GO:0006631 fatty acid metabolic process; GO:0006635 fatty acid beta-oxidation; GO:0006638 neutral lipid metabolic process; GO:0006639 acylglycerol metabolic process; GO:0006641 triglyceride metabolic process; GO:0006810 transport; GO:0006811 ion transport; GO:0006820 anion transpor…	GO:0005576 extracellular region; GO:0005615 extracellular space; GO:0005622 intracellular; GO:0005623 cell; GO:0005737 cytoplasm; GO:0005739 mitochondrion; GO:0005759 mitochondrial matrix; GO:0005829 cytosol; GO:0016528 sarcoplasm; GO:0031974 membrane-enclosed lumen; GO:0043226 organelle; GO:0043227 membrane-bounded organelle; GO:0043229 intracellular organelle; GO:0043231 intracellular membrane-…	GO:0005215 transporter activity; GO:0005319 lipid transporter activity; GO:0005324 long-chain fatty acid transporter activity; GO:0005488 binding; GO:0005504 fatty acid binding; GO:0005515 protein binding; GO:0008092 cytoskeletal protein binding; GO:0008289 lipid binding; GO:0031406 carboxylic acid binding; GO:0033293 monocarboxylic acid binding; GO:0036041 long-chain fatty acid binding; GO:00360…	K08752	FABP3; fatty acid-binding protein 3, muscle and heart	dre03320 PPAR signaling pathway - Danio rerio (zebrafish);	PF00061	Lipocalin / cytosolic fatty-acid binding protein family	I	KOG4015	Fatty acid-binding protein FABP
F02_transcript_17096	UDP-glucuronosyltransferase 2B31-like; K00699 glucuronosyltransferase [EC:2.4.1.17] (A)	59.962	7.2	4	5	4	1.006	0.86	0.882	1.127	1.1	1.095	1.209	0.0177631	endoplasmic reticulum									G	KOG1192	UDP-glucuronosyl and UDP-glucosyl transferase
F02_transcript_11103	septin-5-like; K04557 septin 5 (A)	43.791	34.9	11	16	9	0.952	0.829	0.95	1.172	1.14	0.99	1.209	0.052758	cytoplasm	GO:0000278 mitotic cell cycle; GO:0000281 mitotic cytokinesis; GO:0000910 cytokinesis; GO:0001505 regulation of neurotransmitter levels; GO:0006810 transport; GO:0006836 neurotransmitter transport; GO:0006887 exocytosis; GO:0006903 vesicle targeting; GO:0007049 cell cycle; GO:0007154 cell communication; GO:0007267 cell-cell signaling; GO:0007268 chemical synaptic transmission; GO:0007269 neurotra…	GO:0001725 stress fiber; GO:0005622 intracellular; GO:0005623 cell; GO:0005737 cytoplasm; GO:0005856 cytoskeleton; GO:0005886 plasma membrane; GO:0005938 cell cortex; GO:0005940 septin ring; GO:0008021 synaptic vesicle; GO:0012505 endomembrane system; GO:0015629 actin cytoskeleton; GO:0016020 membrane; GO:0030133 transport vesicle; GO:0030424 axon; GO:0031105 septin complex; GO:0031410 cytoplasmi…	GO:0000149 SNARE binding; GO:0000166 nucleotide binding; GO:0001882 nucleoside binding; GO:0001883 purine nucleoside binding; GO:0003824 catalytic activity; GO:0003924 GTPase activity; GO:0005198 structural molecule activity; GO:0005488 binding; GO:0005515 protein binding; GO:0005525 GTP binding; GO:0005543 phospholipid binding; GO:0008289 lipid binding; GO:0016462 pyrophosphatase activity; GO:00…	K04557	SEPT5, PNUTL1, CDCREL1; septin 5		PF00735	Septin	DUZ	KOG2655	Septin family protein (P-loop GTPase)
F02_transcript_17724	heat shock cognate 71 kDa protein isoform 1 [Mus musculus]	47.778	48.7	21	127	8	0.923	0.866	0.933	1.109	1.115	1.064	1.208	0.0023578	cytoplasm									O	KOG0101	Molecular chaperones HSP70/HSC70, HSP70 superfamily
F02_transcript_27737	nt5c1bb, fl02f11, si:ch211-59d15.1, wu:fl02f11; 5'-nucleotidase, cytosolic IB b; K01081 5'-nucleotidase [EC:3.1.3.5] (A)	36.219	30.7	8	9	5	0.922	0.873	0.821	1.104	0.808	1.248	1.208	0.2633	cytoplasm	GO:0006139 nucleobase-containing compound metabolic process; GO:0006163 purine nucleotide metabolic process; GO:0006195 purine nucleotide catabolic process; GO:0006725 cellular aromatic compound metabolic process; GO:0006753 nucleoside phosphate metabolic process; GO:0006793 phosphorus metabolic process; GO:0006796 phosphate-containing compound metabolic process; GO:0006807 nitrogen compound meta…	GO:0005622 intracellular; GO:0005623 cell; GO:0005737 cytoplasm; GO:0005829 cytosol; GO:0044424 intracellular part; GO:0044444 cytoplasmic part; GO:0044464 cell part;	GO:0003824 catalytic activity; GO:0008252 nucleotidase activity; GO:0008253 5'-nucleotidase activity; GO:0016787 hydrolase activity; GO:0016788 hydrolase activity, acting on ester bonds; GO:0016791 phosphatase activity; GO:0042578 phosphoric ester hydrolase activity;	K01081	E3.1.3.5; 5'-nucleotidase [EC:3.1.3.5]	dre00230 Purine metabolism - Danio rerio (zebrafish); dre00240 Pyrimidine metabolism - Danio rerio (zebrafish); dre00760 Nicotinate and nicotinamide metabolism - Danio rerio (zebrafish); dre01100 Metabolic pathways - Danio rerio (zebrafish);
F02_transcript_1703	interferon-induced helicase C domain-containing protein 1-like; K12647 interferon-induced helicase C domain-containing protein 1 [EC:3.6.4.13] (A)	112.98	5.3	5	6	5	0.833	0.954	0.973	1.144	1.065	1.123	1.207	0.023439	cytoplasm	GO:0000003 reproduction; GO:0000578 embryonic axis specification; GO:0001817 regulation of cytokine production; GO:0001818 negative regulation of cytokine production; GO:0001819 positive regulation of cytokine production; GO:0002218 activation of innate immune response; GO:0002221 pattern recognition receptor signaling pathway; GO:0002252 immune effector process; GO:0002253 activation of immune r…	GO:0000228 nuclear chromosome; GO:0000793 condensed chromosome; GO:0000794 condensed nuclear chromosome; GO:0005622 intracellular; GO:0005623 cell; GO:0005634 nucleus; GO:0005694 chromosome; GO:0005737 cytoplasm; GO:0005829 cytosol; GO:0031974 membrane-enclosed lumen; GO:0031981 nuclear lumen; GO:0032991 macromolecular complex; GO:0035770 ribonucleoprotein granule; GO:0036464 cytoplasmic ribonucl…	GO:0003676 nucleic acid binding; GO:0003723 RNA binding; GO:0003725 double-stranded RNA binding; GO:0003727 single-stranded RNA binding; GO:0003824 catalytic activity; GO:0005488 binding; GO:0005515 protein binding; GO:0008186 RNA-dependent ATPase activity; GO:0008270 zinc ion binding; GO:0016462 pyrophosphatase activity; GO:0016787 hydrolase activity; GO:0016817 hydrolase activity, acting on aci…	K12647	IFIH1, MDA5; interferon-induced helicase C domain-containing protein 1 [EC:3.6.4.13]	dre04622 RIG-I-like receptor signaling pathway - Danio rerio (zebrafish); dre05168 Herpes simplex virus 1 infection - Danio rerio (zebrafish);	PF11648	C-terminal domain of RIG-I	A	KOG0354	DEAD-box like helicase
F02_transcript_21216	xpnpep1, fa02e02, wu:fa02e02, zgc:56366, zgc:77772; X-prolyl aminopeptidase (aminopeptidase P) 1, soluble (EC:3.4.11.9); K01262 Xaa-Pro aminopeptidase [EC:3.4.11.9] (A)	69.488	22.1	11	15	11	0.913	0.933	0.881	1.198	1.053	1.037	1.206	0.0190802	mitochondria	GO:0006508 proteolysis; GO:0006518 peptide metabolic process; GO:0006807 nitrogen compound metabolic process; GO:0008152 metabolic process; GO:0009056 catabolic process; GO:0009987 cellular process; GO:0010815 bradykinin catabolic process; GO:0017144 drug metabolic process; GO:0019538 protein metabolic process; GO:0034641 cellular nitrogen compound metabolic process; GO:0042737 drug catabolic pro…	GO:0005622 intracellular; GO:0005623 cell; GO:0005737 cytoplasm; GO:0005829 cytosol; GO:0044424 intracellular part; GO:0044444 cytoplasmic part; GO:0044464 cell part;	GO:0003824 catalytic activity; GO:0004177 aminopeptidase activity; GO:0005488 binding; GO:0005515 protein binding; GO:0008233 peptidase activity; GO:0008235 metalloexopeptidase activity; GO:0008237 metallopeptidase activity; GO:0008238 exopeptidase activity; GO:0016787 hydrolase activity; GO:0030145 manganese ion binding; GO:0042802 identical protein binding; GO:0042803 protein homodimerization a…	K01262	pepP; Xaa-Pro aminopeptidase [EC:3.4.11.9]		PF01321; PF00557	Creatinase/Prolidase N-terminal domain; Metallopeptidase family M24	E	KOG2413	Xaa-Pro aminopeptidase
F02_transcript_29204	superoxide dismutase [Cu-Zn]-like; K04565 superoxide dismutase, Cu-Zn family [EC:1.15.1.1] (A)	11.312	9.3	1	2	1	1.002	0.752	0.98	1.277	1.038	0.978	1.204	0.20078	extracellular	GO:0000003 reproduction; GO:0000187 activation of MAPK activity; GO:0000209 protein polyubiquitination; GO:0000302 response to reactive oxygen species; GO:0000303 response to superoxide; GO:0000305 response to oxygen radical; GO:0000902 cell morphogenesis; GO:0000904 cell morphogenesis involved in differentiation; GO:0001306 age-dependent response to oxidative stress; GO:0001541 ovarian follicle …	GO:0000323 lytic vacuole; GO:0005576 extracellular region; GO:0005615 extracellular space; GO:0005622 intracellular; GO:0005623 cell; GO:0005634 nucleus; GO:0005654 nucleoplasm; GO:0005737 cytoplasm; GO:0005739 mitochondrion; GO:0005740 mitochondrial envelope; GO:0005758 mitochondrial intermembrane space; GO:0005759 mitochondrial matrix; GO:0005764 lysosome; GO:0005773 vacuole; GO:0005777 peroxis…	GO:0003824 catalytic activity; GO:0004784 superoxide dismutase activity; GO:0004842 ubiquitin-protein transferase activity; GO:0005488 binding; GO:0005507 copper ion binding; GO:0005515 protein binding; GO:0008270 zinc ion binding; GO:0016209 antioxidant activity; GO:0016491 oxidoreductase activity; GO:0016721 oxidoreductase activity, acting on superoxide radicals as acceptor; GO:0016740 transfer…	K04565	SOD1; superoxide dismutase, Cu-Zn family [EC:1.15.1.1]	dre04146 Peroxisome - Danio rerio (zebrafish);	PF00080	Copper/zinc superoxide dismutase (SODC)	P	KOG0441	Cu2+/Zn2+ superoxide dismutase SOD1
F02_transcript_22768	acaa2, fb59b11, wu:fb59b11, zgc:56036; acetyl-CoA acyltransferase 2 (EC:2.3.1.16); K07508 acetyl-CoA acyltransferase 2 [EC:2.3.1.16] (A)	41.373	25.7	7	9	7	0.913	0.852	0.988	1.121	1.101	1.09	1.203	0.0128028	mitochondria	GO:0001666 response to hypoxia; GO:0006066 alcohol metabolic process; GO:0006082 organic acid metabolic process; GO:0006084 acetyl-CoA metabolic process; GO:0006139 nucleobase-containing compound metabolic process; GO:0006163 purine nucleotide metabolic process; GO:0006629 lipid metabolic process; GO:0006631 fatty acid metabolic process; GO:0006635 fatty acid beta-oxidation; GO:0006637 acyl-CoA m…	GO:0005622 intracellular; GO:0005623 cell; GO:0005737 cytoplasm; GO:0005739 mitochondrion; GO:0005759 mitochondrial matrix; GO:0031974 membrane-enclosed lumen; GO:0043226 organelle; GO:0043227 membrane-bounded organelle; GO:0043229 intracellular organelle; GO:0043231 intracellular membrane-bounded organelle; GO:0043233 organelle lumen; GO:0044422 organelle part; GO:0044424 intracellular part; GO:…	GO:0003824 catalytic activity; GO:0003988 acetyl-CoA C-acyltransferase activity; GO:0016408 C-acyltransferase activity; GO:0016740 transferase activity; GO:0016746 transferase activity, transferring acyl groups; GO:0016747 transferase activity, transferring acyl groups other than amino-acyl groups;	K07508	ACAA2; acetyl-CoA acyltransferase 2 [EC:2.3.1.16]	dre00062 Fatty acid elongation - Danio rerio (zebrafish); dre00071 Fatty acid degradation - Danio rerio (zebrafish); dre00280 Valine, leucine and isoleucine degradation - Danio rerio (zebrafish); dre01100 Metabolic pathways - Danio rerio (zebrafish); dre01212 Fatty acid metabolism - Danio rerio (zebrafish);	PF00108; PF02803	Thiolase, N-terminal domain; Thiolase, C-terminal domain	I	KOG1391	Acetyl-CoA acetyltransferase
F02_transcript_16649	occludin-like; K06088 occludin (A)	54.835	13.2	5	8	5	0.944	0.901	0.913	1.147	1.114	1.056	1.203	0.002724	plasma membrane	GO:0007043 cell-cell junction assembly; GO:0009987 cellular process; GO:0010033 response to organic substance; GO:0016043 cellular component organization; GO:0022607 cellular component assembly; GO:0034097 response to cytokine; GO:0034329 cell junction assembly; GO:0034330 cell junction organization; GO:0034612 response to tumor necrosis factor; GO:0042221 response to chemical; GO:0043297 apical …	GO:0005622 intracellular; GO:0005623 cell; GO:0005737 cytoplasm; GO:0005886 plasma membrane; GO:0005911 cell-cell junction; GO:0005923 bicellular tight junction; GO:0009986 cell surface; GO:0016020 membrane; GO:0016324 apical plasma membrane; GO:0016327 apicolateral plasma membrane; GO:0016328 lateral plasma membrane; GO:0030054 cell junction; GO:0030139 endocytic vesicle; GO:0031410 cytoplasmic …	GO:0005488 binding; GO:0005515 protein binding; GO:0019904 protein domain specific binding;	K06088	OCLN; occludin	dre04514 Cell adhesion molecules (CAMs) - Danio rerio (zebrafish); dre04530 Tight junction - Danio rerio (zebrafish);	PF01284; PF07303	Membrane-associating domain; Occludin homology domain
F02_transcript_26916	1,2-dihydroxy-3-keto-5-methylthiopentene dioxygenase-like; K08967 1,2-dihydroxy-3-keto-5-methylthiopentene dioxygenase [EC:1.13.11.53 1.13.11.54] (A)	8.8648	18.9	1	2	1	1.149	0.763	0.829	1.145	0.981	1.169	1.202	0.22252	cytoplasm	GO:0000096 sulfur amino acid metabolic process; GO:0000097 sulfur amino acid biosynthetic process; GO:0006082 organic acid metabolic process; GO:0006520 cellular amino acid metabolic process; GO:0006555 methionine metabolic process; GO:0006790 sulfur compound metabolic process; GO:0006807 nitrogen compound metabolic process; GO:0008152 metabolic process; GO:0008652 cellular amino acid biosyntheti…	GO:0005622 intracellular; GO:0005623 cell; GO:0005634 nucleus; GO:0005737 cytoplasm; GO:0005829 cytosol; GO:0005886 plasma membrane; GO:0016020 membrane; GO:0043226 organelle; GO:0043227 membrane-bounded organelle; GO:0043229 intracellular organelle; GO:0043231 intracellular membrane-bounded organelle; GO:0044424 intracellular part; GO:0044444 cytoplasmic part; GO:0044464 cell part; GO:0071944 ce…	GO:0003824 catalytic activity; GO:0010309 acireductone dioxygenase [iron(II)-requiring] activity; GO:0016491 oxidoreductase activity; GO:0016701 oxidoreductase activity, acting on single donors with incorporation of molecular oxygen; GO:0016702 oxidoreductase activity, acting on single donors with incorporation of molecular oxygen, incorporation of two atoms of oxygen; GO:0051213 dioxygenase acti…				PF03079	ARD/ARD' family	E	KOG2107	Uncharacterized conserved protein, contains double-stranded beta-helix domain
F02_transcript_9144	glud1b, cb719, glud1, wu:fb16e02, wu:fb58f12, wu:fe37f03, wu:fj43f02, zgc:192851, zgc:55630; glutamate dehydrogenase 1b (EC:1.4.1.3); K00261 glutamate dehydrogenase (NAD(P)+) [EC:1.4.1.3] (A)	59.895	45.3	23	76	1	0.809	0.957	0.966	1.378	0.997	0.909	1.202	0.28528	cytoplasm	GO:0002791 regulation of peptide secretion; GO:0002793 positive regulation of peptide secretion; GO:0003008 system process; GO:0006082 organic acid metabolic process; GO:0006103 2-oxoglutarate metabolic process; GO:0006106 fumarate metabolic process; GO:0006116 NADH oxidation; GO:0006139 nucleobase-containing compound metabolic process; GO:0006520 cellular amino acid metabolic process; GO:0006536…	GO:0005622 intracellular; GO:0005623 cell; GO:0005737 cytoplasm; GO:0005739 mitochondrion; GO:0005740 mitochondrial envelope; GO:0005743 mitochondrial inner membrane; GO:0005759 mitochondrial matrix; GO:0016020 membrane; GO:0019866 organelle inner membrane; GO:0031090 organelle membrane; GO:0031966 mitochondrial membrane; GO:0031967 organelle envelope; GO:0031974 membrane-enclosed lumen; GO:00319…	GO:0000166 nucleotide binding; GO:0001882 nucleoside binding; GO:0001883 purine nucleoside binding; GO:0003824 catalytic activity; GO:0004352 glutamate dehydrogenase (NAD+) activity; GO:0004353 glutamate dehydrogenase [NAD(P)+] activity; GO:0005488 binding; GO:0005515 protein binding; GO:0005525 GTP binding; GO:0016491 oxidoreductase activity; GO:0016597 amino acid binding; GO:0016638 oxidoreduct…	K00261	GLUD1_2, gdhA; glutamate dehydrogenase (NAD(P)+) [EC:1.4.1.3]	dre00220 Arginine biosynthesis - Danio rerio (zebrafish); dre00250 Alanine, aspartate and glutamate metabolism - Danio rerio (zebrafish); dre00471 D-Glutamine and D-glutamate metabolism - Danio rerio (zebrafish); dre00910 Nitrogen metabolism - Danio rerio (zebrafish); dre01100 Metabolic pathways - Danio rerio (zebrafish); dre01200 Carbon metabolism - Danio rerio (zebrafish); dre04217 Necroptosis …	PF02812; PF00208	Glu/Leu/Phe/Val dehydrogenase, dimerisation domain; Glutamate/Leucine/Phenylalanine/Valine dehydrogenase	E	KOG2250	Glutamate/leucine/phenylalanine/valine dehydrogenases
F02_transcript_3619	translocon-associated protein subunit alpha-like; K13249 translocon-associated protein subunit alpha (A)	31.279	3.9	1	1	1	0.726	0.891	1.121	0.998	1.203	1.09	1.202	0.22308	extracellular	GO:0006605 protein targeting; GO:0006612 protein targeting to membrane; GO:0006613 cotranslational protein targeting to membrane; GO:0006810 transport; GO:0006886 intracellular protein transport; GO:0006950 response to stress; GO:0006986 response to unfolded protein; GO:0007154 cell communication; GO:0007165 signal transduction; GO:0008104 protein localization; GO:0008284 positive regulation of c…	GO:0005622 intracellular; GO:0005623 cell; GO:0005737 cytoplasm; GO:0005783 endoplasmic reticulum; GO:0005789 endoplasmic reticulum membrane; GO:0012505 endomembrane system; GO:0016020 membrane; GO:0016021 integral component of membrane; GO:0031224 intrinsic component of membrane; GO:0031984 organelle subcompartment; GO:0042175 nuclear outer membrane-endoplasmic reticulum membrane network; GO:004…		K13249	SSR1; translocon-associated protein subunit alpha	dre04141 Protein processing in endoplasmic reticulum - Danio rerio (zebrafish);			U	KOG1631	Translocon-associated complex TRAP, alpha subunit
F02_transcript_9614	Phospholipid scramblase 2 [Stylophora pistillata]	35.65	6.5	3	3	3	0.896	0.85	0.933	1.093	1.014	1.113	1.202	0.0094191	cytoplasm	GO:0002237 response to molecule of bacterial origin; GO:0006810 transport; GO:0006811 ion transport; GO:0006820 anion transport; GO:0006869 lipid transport; GO:0007009 plasma membrane organization; GO:0009605 response to external stimulus; GO:0009607 response to biotic stimulus; GO:0009617 response to bacterium; GO:0009987 cellular process; GO:0010033 response to organic substance; GO:0010256 end…	GO:0005622 intracellular; GO:0005623 cell; GO:0005737 cytoplasm; GO:0005739 mitochondrion; GO:0005886 plasma membrane; GO:0016020 membrane; GO:0043226 organelle; GO:0043227 membrane-bounded organelle; GO:0043229 intracellular organelle; GO:0043231 intracellular membrane-bounded organelle; GO:0044424 intracellular part; GO:0044444 cytoplasmic part; GO:0044464 cell part; GO:0071944 cell periphery;	GO:0005215 transporter activity; GO:0005319 lipid transporter activity; GO:0005488 binding; GO:0005509 calcium ion binding; GO:0005515 protein binding; GO:0005548 phospholipid transporter activity; GO:0017128 phospholipid scramblase activity; GO:0043167 ion binding; GO:0043169 cation binding; GO:0046872 metal ion binding; GO:0048306 calcium-dependent protein binding;				PF03803	Scramblase	M	KOG0621	Phospholipid scramblase
F02_transcript_27395	glutathione S-transferase Mu 3-like; K00799 glutathione S-transferase [EC:2.5.1.18] (A)	25.427	67.4	20	58	20	0.889	0.941	0.926	1.142	1.071	1.099	1.202	0.00187807	cytoplasm	GO:0001101 response to acid chemical; GO:0001885 endothelial cell development; GO:0002064 epithelial cell development; GO:0003158 endothelium development; GO:0006518 peptide metabolic process; GO:0006575 cellular modified amino acid metabolic process; GO:0006725 cellular aromatic compound metabolic process; GO:0006749 glutathione metabolic process; GO:0006790 sulfur compound metabolic process; GO…	GO:0005576 extracellular region; GO:0005622 intracellular; GO:0005623 cell; GO:0005737 cytoplasm; GO:0005829 cytosol; GO:0005886 plasma membrane; GO:0005929 cilium; GO:0016020 membrane; GO:0031514 motile cilium; GO:0032991 macromolecular complex; GO:0035686 sperm fibrous sheath; GO:0036126 sperm flagellum; GO:0042995 cell projection; GO:0043209 myelin sheath; GO:0043226 organelle; GO:0044421 extr…	GO:0003824 catalytic activity; GO:0004364 glutathione transferase activity; GO:0005488 binding; GO:0005496 steroid binding; GO:0005515 protein binding; GO:0008289 lipid binding; GO:0016151 nickel cation binding; GO:0016740 transferase activity; GO:0016765 transferase activity, transferring alkyl or aryl (other than methyl) groups; GO:0019899 enzyme binding; GO:0019900 kinase binding; GO:0019901 p…	K00799	GST, gst; glutathione S-transferase [EC:2.5.1.18]	dre00480 Glutathione metabolism - Danio rerio (zebrafish); dre00980 Metabolism of xenobiotics by cytochrome P450 - Danio rerio (zebrafish); dre00982 Drug metabolism - cytochrome P450 - Danio rerio (zebrafish); dre00983 Drug metabolism - other enzymes - Danio rerio (zebrafish); dre01100 Metabolic pathways - Danio rerio (zebrafish);	PF02798	Glutathione S-transferase, N-terminal domain	O	KOG1695	Glutathione S-transferase
[truncated: 3,133 more rows]
