# Supplementary material for: Proteomic Profiling Skin Mucus of European Eel Anguilla anguilla Infected with Anguillid Herpesvirus
Source: Int J Mol Sci. 2022 Sep 24;23(19):11283. doi: 10.3390/ijms231911283 (PMC9570476; doi:10.3390/ijms231911283)
Supplement: Supplementary file 1 [file ijms-23-11283-s001.zip › Table S2.xlsx]

## Sheet: Differentially expressed
Table S2 Annotation of the identified differentially expressed proteins.
Protein accession	Protein description	V/CK Ratio	Regulated Type	KEGG pathway	V/CK P value	Subcellular localization	Biological Process	Cellular Component	Molecular Function	KEGG KO No.	KEGG Gene	KEGG pathway	Pfam ID	Domain description
F02_transcript_967	Uncharacterized protein	7.613	Up	dre04137 Mitophagy - animal - Danio rerio (zebrafish);	0.000135656	extracellular	GO:0000082 G1/S transition of mitotic cell cycle; GO:0000278 mitotic cell cycle; GO:0006139 nucleobase-containing compound metabolic process; GO:0006259 DNA metabolic process; GO:0006260 DNA replication; GO:0006261 DNA-dependent DNA replication; GO:0006270 DNA replication initiation; GO:0006323 DNA packaging; GO:0006325 chromatin organization; GO:0006342 chromatin silencing; GO:0006355 regulation…	GO:0000228 nuclear chromosome; GO:0005622 intracellular; GO:0005623 cell; GO:0005634 nucleus; GO:0005654 nucleoplasm; GO:0005657 replication fork; GO:0005694 chromosome; GO:0005730 nucleolus; GO:0031298 replication fork protection complex; GO:0031974 membrane-enclosed lumen; GO:0031981 nuclear lumen; GO:0032991 macromolecular complex; GO:0043226 organelle; GO:0043227 membrane-bounded organelle; G…	GO:0003676 nucleic acid binding; GO:0003677 DNA binding; GO:0003688 DNA replication origin binding; GO:0003690 double-stranded DNA binding; GO:0003697 single-stranded DNA binding; GO:0005488 binding; GO:0005515 protein binding; GO:0019899 enzyme binding; GO:0042802 identical protein binding; GO:0043565 sequence-specific DNA binding; GO:0097159 organic cyclic compound binding; GO:1901363 heterocyc…	K19946	OPTN, FIP2; optineurin	dre04137 Mitophagy - animal - Danio rerio (zebrafish);
F02_transcript_25634	cirbpa, wu:fb12a12, wu:fb16h02, wu:fb55a06, wu:fc67h01, wu:fj10g10, zgc:109887, zgc:112425; cold inducible RNA binding protein a; K13195 cold-inducible RNA-binding protein (A)	6.628	Up		3.9061e-05	nucleus				K13195	CIRBP; cold-inducible RNA-binding protein		PF00076	RNA recognition motif. (a.k.a. RRM, RBD, or RNP domain)
F02_transcript_28732	Uncharacterized protein	6.479	Up		8.034e-05	nucleus				K17493	CAMSAP; calmodulin-regulated spectrin-associated protein
F02_transcript_15334	calpain-9-like; K08578 calpain-9 [EC:3.4.22.-] (A)	5.816	Up		0.00092132	cytoplasm	GO:0000003 reproduction; GO:0000768 syncytium formation by plasma membrane fusion; GO:0001667 ameboidal-type cell migration; GO:0002064 epithelial cell development; GO:0002065 columnar/cuboidal epithelial cell differentiation; GO:0002066 columnar/cuboidal epithelial cell development; GO:0003002 regionalization; GO:0003006 developmental process involved in reproduction; GO:0006355 regulation of tr…	GO:0005622 intracellular; GO:0005623 cell; GO:0005737 cytoplasm; GO:0005856 cytoskeleton; GO:0015629 actin cytoskeleton; GO:0036477 somatodendritic compartment; GO:0043025 neuronal cell body; GO:0043226 organelle; GO:0043228 non-membrane-bounded organelle; GO:0043229 intracellular organelle; GO:0043232 intracellular non-membrane-bounded organelle; GO:0044297 cell body; GO:0044424 intracellular pa…	GO:0003824 catalytic activity; GO:0004175 endopeptidase activity; GO:0004197 cysteine-type endopeptidase activity; GO:0004198 calcium-dependent cysteine-type endopeptidase activity; GO:0005488 binding; GO:0005509 calcium ion binding; GO:0008233 peptidase activity; GO:0008234 cysteine-type peptidase activity; GO:0016787 hydrolase activity; GO:0043167 ion binding; GO:0043169 cation binding; GO:0046…	K08578	CAPN9; calpain-9 [EC:3.4.22.-]		PF01067; PF13833	Calpain large subunit, domain III; EF-hand domain pair
F02_transcript_26330	Creatine kinase [Schizopygopsis pylzovi]	5.327	Up	dre00330 Arginine and proline metabolism - Danio rerio (zebrafish); dre01100 Metabolic pathways - Danio rerio (zebrafish);	0.0171795	cytoplasm	GO:0006082 organic acid metabolic process; GO:0006520 cellular amino acid metabolic process; GO:0006575 cellular modified amino acid metabolic process; GO:0006599 phosphagen metabolic process; GO:0006600 creatine metabolic process; GO:0006603 phosphocreatine metabolic process; GO:0006793 phosphorus metabolic process; GO:0006796 phosphate-containing compound metabolic process; GO:0006807 nitrogen …	GO:0005576 extracellular region; GO:0005615 extracellular space; GO:0005622 intracellular; GO:0005623 cell; GO:0005737 cytoplasm; GO:0005829 cytosol; GO:0044421 extracellular region part; GO:0044424 intracellular part; GO:0044444 cytoplasmic part; GO:0044464 cell part;	GO:0003824 catalytic activity; GO:0004111 creatine kinase activity; GO:0016301 kinase activity; GO:0016740 transferase activity; GO:0016772 transferase activity, transferring phosphorus-containing groups; GO:0016775 phosphotransferase activity, nitrogenous group as acceptor;	K00933	E2.7.3.2; creatine kinase [EC:2.7.3.2]	dre00330 Arginine and proline metabolism - Danio rerio (zebrafish); dre01100 Metabolic pathways - Danio rerio (zebrafish);	PF02807; PF00217	ATP:guanido phosphotransferase, N-terminal domain; ATP:guanido phosphotransferase, C-terminal catalytic domain
F02_transcript_28956	Uncharacterized protein	5.214	Up	dre04144 Endocytosis - Danio rerio (zebrafish);	5.7233e-05	nucleus				K18465	MRT43, SWIP; WASH complex subunit 7	dre04144 Endocytosis - Danio rerio (zebrafish);
F02_transcript_1293	calpastatin-like; K04281 calpastatin (A)	5.089	Up		4.3879e-05	nucleus	GO:0000003 reproduction; GO:0000768 syncytium formation by plasma membrane fusion; GO:0001775 cell activation; GO:0001889 liver development; GO:0006807 nitrogen compound metabolic process; GO:0006949 syncytium formation; GO:0007275 multicellular organism development; GO:0007338 single fertilization; GO:0007343 egg activation; GO:0007399 nervous system development; GO:0007417 central nervous syste…	GO:0005622 intracellular; GO:0005623 cell; GO:0005634 nucleus; GO:0005737 cytoplasm; GO:0005783 endoplasmic reticulum; GO:0005829 cytosol; GO:0012505 endomembrane system; GO:0014069 postsynaptic density; GO:0016020 membrane; GO:0032279 asymmetric synapse; GO:0043226 organelle; GO:0043227 membrane-bounded organelle; GO:0043229 intracellular organelle; GO:0043231 intracellular membrane-bounded orga…	GO:0002020 protease binding; GO:0004857 enzyme inhibitor activity; GO:0004866 endopeptidase inhibitor activity; GO:0004869 cysteine-type endopeptidase inhibitor activity; GO:0005488 binding; GO:0005515 protein binding; GO:0010859 calcium-dependent cysteine-type endopeptidase inhibitor activity; GO:0019899 enzyme binding; GO:0030234 enzyme regulator activity; GO:0030414 peptidase inhibitor activit…	K04281	CAST; calpastatin
F02_transcript_26934	keratin, type I cytoskeletal 13-like; K07604 type I keratin, acidic (A)	4.782	Up		1.69289e-05	cytoplasm
F02_transcript_7363	cadherin-13 precursor [Sus scrofa]	4.602	Up		0.00137945	cytoplasm				K22658			PF00028	Cadherin domain
F02_transcript_23050	putative protein PHLOEM PROTEIN 2-LIKE A3 [Stylophora pistillata]	4.45	Up		0.00079501	cytoplasm							PF04548	AIG1 family
F02_transcript_5762	putative protein PHLOEM PROTEIN 2-LIKE A3 [Stylophora pistillata]	4.096	Up		0.0062784	cytoplasm							PF04548	AIG1 family
F02_transcript_4382	senp5, si:ch211-258l4.2, si:ch211-258l4.3; SUMO1/sentrin specific peptidase 5 (EC:3.4.22.68); K08594 sentrin-specific protease 5 [EC:3.4.22.68] (A)	4.017	Up		4.231e-06	nucleus	GO:0000902 cell morphogenesis; GO:0000904 cell morphogenesis involved in differentiation; GO:0001666 response to hypoxia; GO:0002682 regulation of immune system process; GO:0002683 negative regulation of immune system process; GO:0006464 cellular protein modification process; GO:0006508 proteolysis; GO:0006807 nitrogen compound metabolic process; GO:0006950 response to stress; GO:0007275 multicel…	GO:0005622 intracellular; GO:0005623 cell; GO:0005634 nucleus; GO:0005635 nuclear envelope; GO:0005637 nuclear inner membrane; GO:0005643 nuclear pore; GO:0005654 nucleoplasm; GO:0005737 cytoplasm; GO:0012505 endomembrane system; GO:0016020 membrane; GO:0019866 organelle inner membrane; GO:0031090 organelle membrane; GO:0031965 nuclear membrane; GO:0031967 organelle envelope; GO:0031974 membrane-…	GO:0003824 catalytic activity; GO:0004175 endopeptidase activity; GO:0004197 cysteine-type endopeptidase activity; GO:0005488 binding; GO:0005515 protein binding; GO:0008233 peptidase activity; GO:0008234 cysteine-type peptidase activity; GO:0016787 hydrolase activity; GO:0016929 SUMO-specific protease activity; GO:0019783 ubiquitin-like protein-specific protease activity; GO:0070011 peptidase ac…	K08594	SENP5; sentrin-specific protease 5 [EC:3.4.22.68]		PF02902	Ulp1 protease family, C-terminal catalytic domain
F02_transcript_24100	diamine acetyltransferase 1 [Sus scrofa]	3.923	Up	dre00330 Arginine and proline metabolism - Danio rerio (zebrafish); dre01100 Metabolic pathways - Danio rerio (zebrafish); dre04216 Ferroptosis - Danio rerio (zebrafish);	0.020482	cytoplasm	GO:0001525 angiogenesis; GO:0001568 blood vessel development; GO:0001944 vasculature development; GO:0006576 cellular biogenic amine metabolic process; GO:0006595 polyamine metabolic process; GO:0006596 polyamine biosynthetic process; GO:0006598 polyamine catabolic process; GO:0006807 nitrogen compound metabolic process; GO:0007275 multicellular organism development; GO:0008152 metabolic process;…	GO:0005622 intracellular; GO:0005623 cell; GO:0005737 cytoplasm; GO:0005829 cytosol; GO:0044424 intracellular part; GO:0044444 cytoplasmic part; GO:0044464 cell part;	GO:0003824 catalytic activity; GO:0004145 diamine N-acetyltransferase activity; GO:0005488 binding; GO:0005515 protein binding; GO:0008080 N-acetyltransferase activity; GO:0016407 acetyltransferase activity; GO:0016410 N-acyltransferase activity; GO:0016740 transferase activity; GO:0016746 transferase activity, transferring acyl groups; GO:0016747 transferase activity, transferring acyl groups ot…	K00657	speG, SAT; diamine N-acetyltransferase [EC:2.3.1.57]	dre00330 Arginine and proline metabolism - Danio rerio (zebrafish); dre01100 Metabolic pathways - Danio rerio (zebrafish); dre04216 Ferroptosis - Danio rerio (zebrafish);
F02_transcript_29094	ferritin, middle subunit-like; K00522 ferritin heavy chain [EC:1.16.3.2] (A)	3.733	Up		1.7886e-06	cytoplasm							PF00210	Ferritin-like domain
F02_transcript_29986	Uncharacterized protein	3.727	Up		0.00020096	extracellular							PF00059	Lectin C-type domain
F02_transcript_28941	si:rp71-1c23.2 [Danio rerio]	3.688	Up		5.6476e-07	cytoplasm	GO:0000731 DNA synthesis involved in DNA repair; GO:0001817 regulation of cytokine production; GO:0001818 negative regulation of cytokine production; GO:0002252 immune effector process; GO:0002376 immune system process; GO:0002682 regulation of immune system process; GO:0002684 positive regulation of immune system process; GO:0006139 nucleobase-containing compound metabolic process; GO:0006259 DN…	GO:0005576 extracellular region; GO:0005622 intracellular; GO:0005623 cell; GO:0005634 nucleus; GO:0005654 nucleoplasm; GO:0005737 cytoplasm; GO:0005829 cytosol; GO:0031974 membrane-enclosed lumen; GO:0031981 nuclear lumen; GO:0043226 organelle; GO:0043227 membrane-bounded organelle; GO:0043229 intracellular organelle; GO:0043231 intracellular membrane-bounded organelle; GO:0043233 organelle lume…	GO:0031386 protein tag;				PF00240	Ubiquitin family
F02_transcript_15230	protein O-glucosyltransferase 1-like; K13667 protein glucosyltransferase [EC:2.4.1.-] (A)	3.64	Up	dre00514 Other types of O-glycan biosynthesis - Danio rerio (zebrafish);	0.00025729	extracellular	GO:0001654 eye development; GO:0001745 compound eye morphogenesis; GO:0001751 compound eye photoreceptor cell differentiation; GO:0001754 eye photoreceptor cell differentiation; GO:0001756 somitogenesis; GO:0003002 regionalization; GO:0006464 cellular protein modification process; GO:0006486 protein glycosylation; GO:0006493 protein O-linked glycosylation; GO:0006629 lipid metabolic process; GO:0…	GO:0005622 intracellular; GO:0005623 cell; GO:0005737 cytoplasm; GO:0005783 endoplasmic reticulum; GO:0005788 endoplasmic reticulum lumen; GO:0012505 endomembrane system; GO:0031974 membrane-enclosed lumen; GO:0043226 organelle; GO:0043227 membrane-bounded organelle; GO:0043229 intracellular organelle; GO:0043231 intracellular membrane-bounded organelle; GO:0043233 organelle lumen; GO:0044422 org…	GO:0003824 catalytic activity; GO:0008194 UDP-glycosyltransferase activity; GO:0016740 transferase activity; GO:0016757 transferase activity, transferring glycosyl groups; GO:0016758 transferase activity, transferring hexosyl groups; GO:0016763 transferase activity, transferring pentosyl groups; GO:0035251 UDP-glucosyltransferase activity; GO:0035252 UDP-xylosyltransferase activity; GO:0042285 xy…	K13667	RUMI, KTELC1; protein glucosyltransferase [EC:2.4.1.-]	dre00514 Other types of O-glycan biosynthesis - Danio rerio (zebrafish);
F02_transcript_29383	PREDICTED: aggrecan core protein [Nannospalax galili]	3.571	Up		1.70292e-05	extracellular							PF00059	Lectin C-type domain
F02_transcript_24417	Uncharacterized protein	3.561	Up		0.00031665	extracellular	GO:0006950 response to stress; GO:0006952 defense response; GO:0008152 metabolic process; GO:0009056 catabolic process; GO:0009605 response to external stimulus; GO:0009607 response to biotic stimulus; GO:0009617 response to bacterium; GO:0009987 cellular process; GO:0016998 cell wall macromolecule catabolic process; GO:0042742 defense response to bacterium; GO:0043170 macromolecule metabolic pro…	GO:0001669 acrosomal vesicle; GO:0005576 extracellular region; GO:0005615 extracellular space; GO:0005622 intracellular; GO:0005623 cell; GO:0005737 cytoplasm; GO:0005886 plasma membrane; GO:0012505 endomembrane system; GO:0016020 membrane; GO:0030141 secretory granule; GO:0031410 cytoplasmic vesicle; GO:0031982 vesicle; GO:0043226 organelle; GO:0043227 membrane-bounded organelle; GO:0043229 intr…	GO:0003796 lysozyme activity; GO:0003824 catalytic activity; GO:0004553 hydrolase activity, hydrolyzing O-glycosyl compounds; GO:0016787 hydrolase activity; GO:0016798 hydrolase activity, acting on glycosyl bonds; GO:0061783 peptidoglycan muralytic activity;				PF00021	u-PAR/Ly-6 domain
F02_transcript_26454	ckma, CK-M, cb51, ckm, mck, wu:fa28d05; creatine kinase, muscle a; K00933 creatine kinase [EC:2.7.3.2] (A)	3.432	Up	dre00330 Arginine and proline metabolism - Danio rerio (zebrafish); dre01100 Metabolic pathways - Danio rerio (zebrafish);	7.6074e-05	cytoplasm	GO:0006082 organic acid metabolic process; GO:0006520 cellular amino acid metabolic process; GO:0006575 cellular modified amino acid metabolic process; GO:0006599 phosphagen metabolic process; GO:0006600 creatine metabolic process; GO:0006603 phosphocreatine metabolic process; GO:0006793 phosphorus metabolic process; GO:0006796 phosphate-containing compound metabolic process; GO:0006807 nitrogen …	GO:0005576 extracellular region; GO:0005615 extracellular space; GO:0005622 intracellular; GO:0005623 cell; GO:0005737 cytoplasm; GO:0005829 cytosol; GO:0044421 extracellular region part; GO:0044424 intracellular part; GO:0044444 cytoplasmic part; GO:0044464 cell part;	GO:0003824 catalytic activity; GO:0004111 creatine kinase activity; GO:0016301 kinase activity; GO:0016740 transferase activity; GO:0016772 transferase activity, transferring phosphorus-containing groups; GO:0016775 phosphotransferase activity, nitrogenous group as acceptor;	K00933	E2.7.3.2; creatine kinase [EC:2.7.3.2]	dre00330 Arginine and proline metabolism - Danio rerio (zebrafish); dre01100 Metabolic pathways - Danio rerio (zebrafish);	PF02807; PF00217	ATP:guanido phosphotransferase, N-terminal domain; ATP:guanido phosphotransferase, C-terminal catalytic domain
F02_transcript_25196	TATA-binding protein-associated factor 2N-like; K13098 RNA-binding protein FUS (A)	3.355	Up		0.00128219	nucleus	GO:0006139 nucleobase-containing compound metabolic process; GO:0006351 transcription, DNA-templated; GO:0006352 DNA-templated transcription, initiation; GO:0006355 regulation of transcription, DNA-templated; GO:0006366 transcription from RNA polymerase II promoter; GO:0006367 transcription initiation from RNA polymerase II promoter; GO:0006725 cellular aromatic compound metabolic process; GO:000…	GO:0005622 intracellular; GO:0005623 cell; GO:0005634 nucleus; GO:0005654 nucleoplasm; GO:0005737 cytoplasm; GO:0031974 membrane-enclosed lumen; GO:0031981 nuclear lumen; GO:0043226 organelle; GO:0043227 membrane-bounded organelle; GO:0043229 intracellular organelle; GO:0043231 intracellular membrane-bounded organelle; GO:0043233 organelle lumen; GO:0044422 organelle part; GO:0044424 intracellula…		K13098	TLS, FUS; RNA-binding protein FUS
F02_transcript_11605	major histocompatibility complex class I ZE like precursor [Danio rerio]	3.319	Up		0.024805	extracellular							PF00129; PF07654	Class I Histocompatibility antigen, domains alpha 1 and 2; Immunoglobulin C1-set domain
F02_transcript_13489	major histocompatibility complex class I UFA precursor [Danio rerio]	3.274	Up		4.1478e-06	plasma membrane							PF00129; PF07654	Class I Histocompatibility antigen, domains alpha 1 and 2; Immunoglobulin C1-set domain
F02_transcript_11887	RecName: Full=Galectin-4; Short=Gal-4; AltName: Full=L-36 lactose-binding protein; Short=L36LBP;AltName: Full=Lactose-binding lectin 4	3.224	Up		0.00176118	cytoplasm	GO:0007155 cell adhesion; GO:0022610 biological adhesion;	GO:0005576 extracellular region; GO:0005615 extracellular space; GO:0005622 intracellular; GO:0005623 cell; GO:0005737 cytoplasm; GO:0005829 cytosol; GO:0005886 plasma membrane; GO:0016020 membrane; GO:0044421 extracellular region part; GO:0044424 intracellular part; GO:0044444 cytoplasmic part; GO:0044464 cell part; GO:0071944 cell periphery;	GO:0005488 binding; GO:0016936 galactoside binding; GO:0030246 carbohydrate binding; GO:0097367 carbohydrate derivative binding;				PF00337	Galactoside-binding lectin
F02_transcript_23581	TBC1 domain family member 15, partial [Stegodyphus mimosarum]	3.086	Up	dre04137 Mitophagy - animal - Danio rerio (zebrafish);	0.0008049	cytoplasm	GO:0006810 transport; GO:0006886 intracellular protein transport; GO:0008104 protein localization; GO:0015031 protein transport; GO:0015833 peptide transport; GO:0016192 vesicle-mediated transport; GO:0016197 endosomal transport; GO:0016482 cytosolic transport; GO:0031338 regulation of vesicle fusion; GO:0032879 regulation of localization; GO:0033036 macromolecule localization; GO:0033043 regulat…	GO:0005576 extracellular region; GO:0005622 intracellular; GO:0005623 cell; GO:0005737 cytoplasm; GO:0005768 endosome; GO:0005829 cytosol; GO:0012505 endomembrane system; GO:0031410 cytoplasmic vesicle; GO:0031982 vesicle; GO:0043226 organelle; GO:0043227 membrane-bounded organelle; GO:0043229 intracellular organelle; GO:0044424 intracellular part; GO:0044444 cytoplasmic part; GO:0044464 cell par…	GO:0005096 GTPase activator activity; GO:0005488 binding; GO:0005515 protein binding; GO:0008047 enzyme activator activity; GO:0017016 Ras GTPase binding; GO:0017137 Rab GTPase binding; GO:0019899 enzyme binding; GO:0030234 enzyme regulator activity; GO:0030695 GTPase regulator activity; GO:0031267 small GTPase binding; GO:0051020 GTPase binding; GO:0060589 nucleoside-triphosphatase regulator act…	K20168	TBC1D15; TBC1 domain family member 15	dre04137 Mitophagy - animal - Danio rerio (zebrafish);
F02_transcript_14115	keratin, type II cytoskeletal 8-like; K07605 type II keratin, basic (A)	3.084	Up		0.0071353	mitochondria				K07605	KRT2; type II keratin, basic
F02_transcript_7061	Allene oxide synthase-lipoxygenase protein [Stylophora pistillata]	3.015	Up	dre00590 Arachidonic acid metabolism - Danio rerio (zebrafish); dre01100 Metabolic pathways - Danio rerio (zebrafish);	0.00042403	cytoplasm	GO:0001676 long-chain fatty acid metabolic process; GO:0006082 organic acid metabolic process; GO:0006629 lipid metabolic process; GO:0006631 fatty acid metabolic process; GO:0006633 fatty acid biosynthetic process; GO:0006636 unsaturated fatty acid biosynthetic process; GO:0006690 icosanoid metabolic process; GO:0008152 metabolic process; GO:0008610 lipid biosynthetic process; GO:0009058 biosynt…	GO:0005622 intracellular; GO:0005623 cell; GO:0005737 cytoplasm; GO:0005829 cytosol; GO:0016020 membrane; GO:0019898 extrinsic component of membrane; GO:0044424 intracellular part; GO:0044425 membrane part; GO:0044444 cytoplasmic part; GO:0044464 cell part;	GO:0003824 catalytic activity; GO:0005488 binding; GO:0005506 iron ion binding; GO:0005509 calcium ion binding; GO:0016491 oxidoreductase activity; GO:0016701 oxidoreductase activity, acting on single donors with incorporation of molecular oxygen; GO:0016702 oxidoreductase activity, acting on single donors with incorporation of molecular oxygen, incorporation of two atoms of oxygen; GO:0043167 io…	K00461	ALOX5; arachidonate 5-lipoxygenase [EC:1.13.11.34]	dre00590 Arachidonic acid metabolism - Danio rerio (zebrafish); dre01100 Metabolic pathways - Danio rerio (zebrafish);	PF00305	Lipoxygenase
F02_transcript_428	lmna, cb948, fk66d12, wu:fk66d12; lamin A; K12641 lamin A/C (A)	3.007	Up	dre04210 Apoptosis - Danio rerio (zebrafish);	0.00046104	nucleus	GO:0000003 reproduction; GO:0000226 microtubule cytoskeleton organization; GO:0000278 mitotic cell cycle; GO:0000280 nuclear division; GO:0000910 cytokinesis; GO:0001654 eye development; GO:0001666 response to hypoxia; GO:0001745 compound eye morphogenesis; GO:0001763 morphogenesis of a branching structure; GO:0002009 morphogenesis of an epithelium; GO:0002682 regulation of immune system process;…	GO:0005622 intracellular; GO:0005623 cell; GO:0005634 nucleus; GO:0005635 nuclear envelope; GO:0005638 lamin filament; GO:0005652 nuclear lamina; GO:0005654 nucleoplasm; GO:0005737 cytoplasm; GO:0005829 cytosol; GO:0005856 cytoskeleton; GO:0005882 intermediate filament; GO:0012505 endomembrane system; GO:0016020 membrane; GO:0016363 nuclear matrix; GO:0031090 organelle membrane; GO:0031965 nuclea…	GO:0005102 receptor binding; GO:0005198 structural molecule activity; GO:0005488 binding; GO:0005515 protein binding; GO:0008157 protein phosphatase 1 binding; GO:0019899 enzyme binding; GO:0019902 phosphatase binding; GO:0019903 protein phosphatase binding; GO:0042393 histone binding; GO:0042802 identical protein binding;	K12641	LMNA; lamin A/C	dre04210 Apoptosis - Danio rerio (zebrafish);	PF00932	Lamin Tail Domain
F02_transcript_3493	alpha-aminoadipic semialdehyde synthase, mitochondrial-like; K14157 alpha-aminoadipic semialdehyde synthase [EC:1.5.1.8 1.5.1.9] (A)	2.955	Up	dre00310 Lysine degradation - Danio rerio (zebrafish); dre01100 Metabolic pathways - Danio rerio (zebrafish);	0.0166754	cytoplasm,nucleus	GO:0006082 organic acid metabolic process; GO:0006091 generation of precursor metabolites and energy; GO:0006520 cellular amino acid metabolic process; GO:0006553 lysine metabolic process; GO:0006554 lysine catabolic process; GO:0006807 nitrogen compound metabolic process; GO:0008152 metabolic process; GO:0008652 cellular amino acid biosynthetic process; GO:0009056 catabolic process; GO:0009058 b…	GO:0005622 intracellular; GO:0005623 cell; GO:0005737 cytoplasm; GO:0005739 mitochondrion; GO:0005759 mitochondrial matrix; GO:0031974 membrane-enclosed lumen; GO:0043226 organelle; GO:0043227 membrane-bounded organelle; GO:0043229 intracellular organelle; GO:0043231 intracellular membrane-bounded organelle; GO:0043233 organelle lumen; GO:0044422 organelle part; GO:0044424 intracellular part; GO:…	GO:0003824 catalytic activity; GO:0004753 saccharopine dehydrogenase activity; GO:0016491 oxidoreductase activity; GO:0016645 oxidoreductase activity, acting on the CH-NH group of donors; GO:0016646 oxidoreductase activity, acting on the CH-NH group of donors, NAD or NADP as acceptor; GO:0047130 saccharopine dehydrogenase (NADP+, L-lysine-forming) activity; GO:0047131 saccharopine dehydrogenase (…	K14157	AASS; alpha-aminoadipic semialdehyde synthase [EC:1.5.1.8 1.5.1.9]	dre00310 Lysine degradation - Danio rerio (zebrafish); dre01100 Metabolic pathways - Danio rerio (zebrafish);	PF01262	Alanine dehydrogenase/PNT, C-terminal domain
F02_transcript_16162	major histocompatibility complex class I UFA precursor [Danio rerio]	2.904	Up		0.0031408	extracellular							PF00129; PF07654	Class I Histocompatibility antigen, domains alpha 1 and 2; Immunoglobulin C1-set domain
F02_transcript_8033	Capn1, fj67g01, wu:fj67g01; zgc:55262 (EC:3.4.22.17); K01367 calpain-1 [EC:3.4.22.52] (A)	2.866	Up	dre04141 Protein processing in endoplasmic reticulum - Danio rerio (zebrafish); dre04210 Apoptosis - Danio rerio (zebrafish); dre04217 Necroptosis - Danio rerio (zebrafish); dre04218 Cellular senescence - Danio rerio (zebrafish);	0.014144	nucleus	GO:0000003 reproduction; GO:0000768 syncytium formation by plasma membrane fusion; GO:0001667 ameboidal-type cell migration; GO:0001775 cell activation; GO:0002064 epithelial cell development; GO:0002065 columnar/cuboidal epithelial cell differentiation; GO:0002066 columnar/cuboidal epithelial cell development; GO:0002252 immune effector process; GO:0002263 cell activation involved in immune resp…	GO:0000323 lytic vacuole; GO:0005576 extracellular region; GO:0005622 intracellular; GO:0005623 cell; GO:0005737 cytoplasm; GO:0005739 mitochondrion; GO:0005764 lysosome; GO:0005773 vacuole; GO:0005829 cytosol; GO:0005856 cytoskeleton; GO:0005886 plasma membrane; GO:0012505 endomembrane system; GO:0015629 actin cytoskeleton; GO:0016020 membrane; GO:0030141 secretory granule; GO:0031410 cytoplasmi…	GO:0003824 catalytic activity; GO:0004175 endopeptidase activity; GO:0004197 cysteine-type endopeptidase activity; GO:0004198 calcium-dependent cysteine-type endopeptidase activity; GO:0005488 binding; GO:0005509 calcium ion binding; GO:0005515 protein binding; GO:0008092 cytoskeletal protein binding; GO:0008233 peptidase activity; GO:0008234 cysteine-type peptidase activity; GO:0016787 hydrolase…	K01367	CAPN1; calpain-1 [EC:3.4.22.52]	dre04141 Protein processing in endoplasmic reticulum - Danio rerio (zebrafish); dre04210 Apoptosis - Danio rerio (zebrafish); dre04217 Necroptosis - Danio rerio (zebrafish); dre04218 Cellular senescence - Danio rerio (zebrafish);	PF01067; PF13833; PF13202	Calpain large subunit, domain III; EF-hand domain pair; EF hand
F02_transcript_17237	aass; aminoadipate-semialdehyde synthase; K14157 alpha-aminoadipic semialdehyde synthase [EC:1.5.1.8 1.5.1.9] (A)	2.769	Up	dre00310 Lysine degradation - Danio rerio (zebrafish); dre01100 Metabolic pathways - Danio rerio (zebrafish);	0.00022363	cytoplasm	GO:0006082 organic acid metabolic process; GO:0006091 generation of precursor metabolites and energy; GO:0006520 cellular amino acid metabolic process; GO:0006553 lysine metabolic process; GO:0006554 lysine catabolic process; GO:0006807 nitrogen compound metabolic process; GO:0008152 metabolic process; GO:0008652 cellular amino acid biosynthetic process; GO:0009056 catabolic process; GO:0009058 b…	GO:0005622 intracellular; GO:0005623 cell; GO:0005737 cytoplasm; GO:0005739 mitochondrion; GO:0005759 mitochondrial matrix; GO:0031974 membrane-enclosed lumen; GO:0043226 organelle; GO:0043227 membrane-bounded organelle; GO:0043229 intracellular organelle; GO:0043231 intracellular membrane-bounded organelle; GO:0043233 organelle lumen; GO:0044422 organelle part; GO:0044424 intracellular part; GO:…	GO:0003824 catalytic activity; GO:0004753 saccharopine dehydrogenase activity; GO:0016491 oxidoreductase activity; GO:0016645 oxidoreductase activity, acting on the CH-NH group of donors; GO:0016646 oxidoreductase activity, acting on the CH-NH group of donors, NAD or NADP as acceptor; GO:0047130 saccharopine dehydrogenase (NADP+, L-lysine-forming) activity; GO:0047131 saccharopine dehydrogenase (…	K14157	AASS; alpha-aminoadipic semialdehyde synthase [EC:1.5.1.8 1.5.1.9]	dre00310 Lysine degradation - Danio rerio (zebrafish); dre01100 Metabolic pathways - Danio rerio (zebrafish);
F02_transcript_20906	galectin-3-binding protein precursor [Mus musculus]	2.755	Up		0.00044351	extracellular	GO:0002576 platelet degranulation; GO:0006810 transport; GO:0006887 exocytosis; GO:0006897 endocytosis; GO:0006898 receptor-mediated endocytosis; GO:0006950 response to stress; GO:0006952 defense response; GO:0006968 cellular defense response; GO:0007154 cell communication; GO:0007165 signal transduction; GO:0009987 cellular process; GO:0016192 vesicle-mediated transport; GO:0023052 signaling; GO…	GO:0005576 extracellular region; GO:0005615 extracellular space; GO:0005622 intracellular; GO:0005623 cell; GO:0005737 cytoplasm; GO:0012505 endomembrane system; GO:0030141 secretory granule; GO:0031089 platelet dense granule lumen; GO:0031410 cytoplasmic vesicle; GO:0031974 membrane-enclosed lumen; GO:0031982 vesicle; GO:0031983 vesicle lumen; GO:0034774 secretory granule lumen; GO:0042827 plate…	GO:0005044 scavenger receptor activity; GO:0038024 cargo receptor activity;	K17300	LGALS3BP; galectin-3-binding protein		PF00530; PF07707	Scavenger receptor cysteine-rich domain; BTB And C-terminal Kelch
F02_transcript_3335	cell surface A33 antigen-like; K06790 cell surface A33 antigen (A)	2.613	Up		0.00071995	plasma membrane	GO:0007154 cell communication; GO:0007165 signal transduction; GO:0009987 cellular process; GO:0023052 signaling; GO:0050789 regulation of biological process; GO:0050794 regulation of cellular process; GO:0050896 response to stimulus; GO:0051716 cellular response to stimulus; GO:0065007 biological regulation;	GO:0005623 cell; GO:0005886 plasma membrane; GO:0005887 integral component of plasma membrane; GO:0016020 membrane; GO:0016021 integral component of membrane; GO:0031224 intrinsic component of membrane; GO:0031226 intrinsic component of plasma membrane; GO:0044425 membrane part; GO:0044459 plasma membrane part; GO:0044464 cell part; GO:0071944 cell periphery;	GO:0038023 signaling receptor activity; GO:0060089 molecular transducer activity;				PF07686; PF13927	Immunoglobulin V-set domain; Immunoglobulin domain
F02_transcript_6	mucin-2 precursor [Gallus gallus]	2.493	Up		0.0087982	extracellular							PF08742	C8 domain
F02_transcript_157	Uncharacterized protein	2.445	Up		0.00037707	nucleus
F02_transcript_21782	nephronectin-like; K06824 nephronectin (A)	2.443	Up	dre04512 ECM-receptor interaction - Danio rerio (zebrafish);	0.004964	extracellular	GO:0001655 urogenital system development; GO:0001657 ureteric bud development; GO:0001658 branching involved in ureteric bud morphogenesis; GO:0001763 morphogenesis of a branching structure; GO:0001822 kidney development; GO:0001823 mesonephros development; GO:0001932 regulation of protein phosphorylation; GO:0001934 positive regulation of protein phosphorylation; GO:0002009 morphogenesis of an e…	GO:0005576 extracellular region; GO:0005604 basement membrane; GO:0005622 intracellular; GO:0005623 cell; GO:0005737 cytoplasm; GO:0030485 smooth muscle contractile fiber; GO:0031012 extracellular matrix; GO:0043226 organelle; GO:0043228 non-membrane-bounded organelle; GO:0043229 intracellular organelle; GO:0043232 intracellular non-membrane-bounded organelle; GO:0043292 contractile fiber; GO:004…	GO:0005102 receptor binding; GO:0005178 integrin binding; GO:0005488 binding; GO:0005515 protein binding; GO:0044877 macromolecular complex binding; GO:0050839 cell adhesion molecule binding;	K06824	NPNT; nephronectin	dre04512 ECM-receptor interaction - Danio rerio (zebrafish);	PF07645; PF00629	Calcium-binding EGF domain; MAM domain
F02_transcript_17675	major histocompatibility complex class I UFA precursor [Danio rerio]	2.415	Up		0.024457	peroxisome							PF00129; PF07654	Class I Histocompatibility antigen, domains alpha 1 and 2; Immunoglobulin C1-set domain
F02_transcript_28301	cytosolic 5'-nucleotidase 1A-like; K01081 5'-nucleotidase [EC:3.1.3.5] (A)	2.298	Up	dre00230 Purine metabolism - Danio rerio (zebrafish); dre00240 Pyrimidine metabolism - Danio rerio (zebrafish); dre00760 Nicotinate and nicotinamide metabolism - Danio rerio (zebrafish); dre01100 Metabolic pathways - Danio rerio (zebrafish);	0.00149882	cytoplasm	GO:0006139 nucleobase-containing compound metabolic process; GO:0006163 purine nucleotide metabolic process; GO:0006195 purine nucleotide catabolic process; GO:0006725 cellular aromatic compound metabolic process; GO:0006753 nucleoside phosphate metabolic process; GO:0006793 phosphorus metabolic process; GO:0006796 phosphate-containing compound metabolic process; GO:0006807 nitrogen compound meta…	GO:0005622 intracellular; GO:0005623 cell; GO:0005737 cytoplasm; GO:0005829 cytosol; GO:0044424 intracellular part; GO:0044444 cytoplasmic part; GO:0044464 cell part;	GO:0003824 catalytic activity; GO:0008252 nucleotidase activity; GO:0008253 5'-nucleotidase activity; GO:0016787 hydrolase activity; GO:0016788 hydrolase activity, acting on ester bonds; GO:0016791 phosphatase activity; GO:0042578 phosphoric ester hydrolase activity;	K01081	E3.1.3.5; 5'-nucleotidase [EC:3.1.3.5]	dre00230 Purine metabolism - Danio rerio (zebrafish); dre00240 Pyrimidine metabolism - Danio rerio (zebrafish); dre00760 Nicotinate and nicotinamide metabolism - Danio rerio (zebrafish); dre01100 Metabolic pathways - Danio rerio (zebrafish);
F02_transcript_11085	Uncharacterized protein	2.288	Up		0.0022193	plasma membrane	GO:0001775 cell activation; GO:0001817 regulation of cytokine production; GO:0001819 positive regulation of cytokine production; GO:0002252 immune effector process; GO:0002263 cell activation involved in immune response; GO:0002274 myeloid leukocyte activation; GO:0002275 myeloid cell activation involved in immune response; GO:0002283 neutrophil activation involved in immune response; GO:0002366 …	GO:0005622 intracellular; GO:0005623 cell; GO:0005737 cytoplasm; GO:0005886 plasma membrane; GO:0005887 integral component of plasma membrane; GO:0009986 cell surface; GO:0012505 endomembrane system; GO:0012506 vesicle membrane; GO:0016020 membrane; GO:0016021 integral component of membrane; GO:0030141 secretory granule; GO:0030659 cytoplasmic vesicle membrane; GO:0030667 secretory granule membra…	GO:0005102 receptor binding; GO:0005488 binding; GO:0005515 protein binding;
F02_transcript_4748	RecName: Full=Galectin-4; Short=Gal-4; AltName: Full=L-36 lactose-binding protein; Short=L36LBP;AltName: Full=Lactose-binding lectin 4	2.285	Up		2.4949e-05	cytoplasm	GO:0007155 cell adhesion; GO:0022610 biological adhesion;	GO:0005576 extracellular region; GO:0005615 extracellular space; GO:0005622 intracellular; GO:0005623 cell; GO:0005737 cytoplasm; GO:0005829 cytosol; GO:0005886 plasma membrane; GO:0016020 membrane; GO:0044421 extracellular region part; GO:0044424 intracellular part; GO:0044444 cytoplasmic part; GO:0044464 cell part; GO:0071944 cell periphery;	GO:0005488 binding; GO:0016936 galactoside binding; GO:0030246 carbohydrate binding; GO:0097367 carbohydrate derivative binding;				PF00337	Galactoside-binding lectin
F02_transcript_6573	hook1, si:dkey-183n20.14; hook microtubule-tethering protein 1; K16612 protein HOOK1 (A)	2.278	Up		0.00100181	cytoplasm	GO:0000226 microtubule cytoskeleton organization; GO:0006810 transport; GO:0006996 organelle organization; GO:0007010 cytoskeleton organization; GO:0007017 microtubule-based process; GO:0007032 endosome organization; GO:0007033 vacuole organization; GO:0007034 vacuolar transport; GO:0007040 lysosome organization; GO:0007041 lysosomal transport; GO:0008333 endosome to lysosome transport; GO:000998…	GO:0005622 intracellular; GO:0005623 cell; GO:0005737 cytoplasm; GO:0005813 centrosome; GO:0005815 microtubule organizing center; GO:0005856 cytoskeleton; GO:0015630 microtubule cytoskeleton; GO:0032991 macromolecular complex; GO:0043226 organelle; GO:0043228 non-membrane-bounded organelle; GO:0043229 intracellular organelle; GO:0043232 intracellular non-membrane-bounded organelle; GO:0044422 org…	GO:0005488 binding; GO:0005515 protein binding; GO:0008017 microtubule binding; GO:0008092 cytoskeletal protein binding; GO:0015631 tubulin binding; GO:0051959 dynein light intermediate chain binding;	K16612	HOOK1; protein HOOK1
F02_transcript_6830	Uncharacterized protein	2.208	Up		0.00028467	cytoplasm							PF13402	Peptidase M60-like family
F02_transcript_4	mucin-5AC-like [Stylophora pistillata]	2.199	Up		0.00025925	plasma membrane							PF08742; PF01826; PF12714	C8 domain; Trypsin Inhibitor like cysteine rich domain; TILa domain
F02_transcript_12544	interferon-induced protein with tetratricopeptide repeats 2, partial [Bos taurus]	2.052	Up		0.000120168	nucleus
F02_transcript_23618	zinc finger protein 2 homolog, partial [Bos taurus]	2.02	Up		0.0118984	nucleus							PF00096	Zinc finger, C2H2 type
F02_transcript_25433	Uncharacterized protein	2.012	Up	dre04142 Lysosome - Danio rerio (zebrafish);	0.026815	nucleus				K12396	AP3D; AP-3 complex subunit delta	dre04142 Lysosome - Danio rerio (zebrafish);
F02_transcript_29807	fatty acid-binding protein, liver [Gallus gallus]	1.997	Up		0.000136877	cytoplasm		GO:0005622 intracellular; GO:0005623 cell; GO:0005737 cytoplasm; GO:0044424 intracellular part; GO:0044464 cell part;	GO:0005488 binding; GO:0031406 carboxylic acid binding; GO:0032052 bile acid binding; GO:0033293 monocarboxylic acid binding; GO:0036094 small molecule binding; GO:0043167 ion binding; GO:0043168 anion binding; GO:0043177 organic acid binding;
F02_transcript_21489	cep70, si:dkey-170g11.4; centrosomal protein 70; K16802 centrosomal protein CEP70 (A)	1.978	Up		0.0042014	nucleus	GO:0000086 G2/M transition of mitotic cell cycle; GO:0000278 mitotic cell cycle; GO:0006996 organelle organization; GO:0007049 cell cycle; GO:0007346 regulation of mitotic cell cycle; GO:0009987 cellular process; GO:0010389 regulation of G2/M transition of mitotic cell cycle; GO:0010564 regulation of cell cycle process; GO:0016043 cellular component organization; GO:0022402 cell cycle process; GO…	GO:0005622 intracellular; GO:0005623 cell; GO:0005634 nucleus; GO:0005635 nuclear envelope; GO:0005654 nucleoplasm; GO:0005737 cytoplasm; GO:0005813 centrosome; GO:0005815 microtubule organizing center; GO:0005829 cytosol; GO:0005856 cytoskeleton; GO:0012505 endomembrane system; GO:0015630 microtubule cytoskeleton; GO:0016020 membrane; GO:0031090 organelle membrane; GO:0031965 nuclear membrane; G…	GO:0005488 binding; GO:0005515 protein binding; GO:0042802 identical protein binding;	K16802	CEP70; centrosomal protein CEP70
F02_transcript_16869	L-lactate dehydrogenase A chain-like; K00016 L-lactate dehydrogenase [EC:1.1.1.27] (A)	1.96	Up	dre00010 Glycolysis / Gluconeogenesis - Danio rerio (zebrafish); dre00270 Cysteine and methionine metabolism - Danio rerio (zebrafish); dre00620 Pyruvate metabolism - Danio rerio (zebrafish); dre00640 Propanoate metabolism - Danio rerio (zebrafish); dre01100 Metabolic pathways - Danio rerio (zebrafish);	0.031018	plasma membrane	GO:0000302 response to reactive oxygen species; GO:0000768 syncytium formation by plasma membrane fusion; GO:0001666 response to hypoxia; GO:0005975 carbohydrate metabolic process; GO:0005996 monosaccharide metabolic process; GO:0006006 glucose metabolic process; GO:0006007 glucose catabolic process; GO:0006082 organic acid metabolic process; GO:0006089 lactate metabolic process; GO:0006090 pyruv…	GO:0005622 intracellular; GO:0005623 cell; GO:0005737 cytoplasm; GO:0005739 mitochondrion; GO:0005759 mitochondrial matrix; GO:0005829 cytosol; GO:0005929 cilium; GO:0031514 motile cilium; GO:0031974 membrane-enclosed lumen; GO:0035686 sperm fibrous sheath; GO:0036126 sperm flagellum; GO:0042995 cell projection; GO:0043226 organelle; GO:0043227 membrane-bounded organelle; GO:0043229 intracellular…	GO:0000166 nucleotide binding; GO:0003824 catalytic activity; GO:0004457 lactate dehydrogenase activity; GO:0004459 L-lactate dehydrogenase activity; GO:0005488 binding; GO:0005515 protein binding; GO:0016491 oxidoreductase activity; GO:0016614 oxidoreductase activity, acting on CH-OH group of donors; GO:0016616 oxidoreductase activity, acting on the CH-OH group of donors, NAD or NADP as acceptor…	K00016	LDH, ldh; L-lactate dehydrogenase [EC:1.1.1.27]	dre00010 Glycolysis / Gluconeogenesis - Danio rerio (zebrafish); dre00270 Cysteine and methionine metabolism - Danio rerio (zebrafish); dre00620 Pyruvate metabolism - Danio rerio (zebrafish); dre00640 Propanoate metabolism - Danio rerio (zebrafish); dre01100 Metabolic pathways - Danio rerio (zebrafish);	PF02866	lactate/malate dehydrogenase, alpha/beta C-terminal domain
F02_transcript_1	Protein translocase subunit SecA [Stylophora pistillata]	1.951	Up		2.4274e-05	nucleus							PF07517	SecA DEAD-like domain
F02_transcript_14379	signal transducer and activator of transcription 1-like; K11220 signal transducer and activator of transcription 1 (A)	1.915	Up	dre04217 Necroptosis - Danio rerio (zebrafish); dre04620 Toll-like receptor signaling pathway - Danio rerio (zebrafish); dre04621 NOD-like receptor signaling pathway - Danio rerio (zebrafish); dre04625 C-type lectin receptor signaling pathway - Danio rerio (zebrafish); dre04933 AGE-RAGE signaling pathway in diabetic complications - Danio rerio (zebrafish); dre05168 Herpes simplex virus 1 infectio…	0.00045973	cytoplasm	GO:0000122 negative regulation of transcription from RNA polymerase II promoter; GO:0001655 urogenital system development; GO:0001656 metanephros development; GO:0001817 regulation of cytokine production; GO:0001819 positive regulation of cytokine production; GO:0001822 kidney development; GO:0001936 regulation of endothelial cell proliferation; GO:0001937 negative regulation of endothelial cell …	GO:0000228 nuclear chromosome; GO:0000785 chromatin; GO:0000790 nuclear chromatin; GO:0005622 intracellular; GO:0005623 cell; GO:0005634 nucleus; GO:0005654 nucleoplasm; GO:0005694 chromosome; GO:0005730 nucleolus; GO:0005737 cytoplasm; GO:0005829 cytosol; GO:0030424 axon; GO:0030425 dendrite; GO:0031974 membrane-enclosed lumen; GO:0031981 nuclear lumen; GO:0032991 macromolecular complex; GO:0036…	GO:0000976 transcription regulatory region sequence-specific DNA binding; GO:0000977 RNA polymerase II regulatory region sequence-specific DNA binding; GO:0000978 RNA polymerase II core promoter proximal region sequence-specific DNA binding; GO:0000979 RNA polymerase II core promoter sequence-specific DNA binding; GO:0000981 RNA polymerase II transcription factor activity, sequence-specific DNA b…	K11220	STAT1; signal transducer and activator of transcription 1	dre04217 Necroptosis - Danio rerio (zebrafish); dre04620 Toll-like receptor signaling pathway - Danio rerio (zebrafish); dre04621 NOD-like receptor signaling pathway - Danio rerio (zebrafish); dre04625 C-type lectin receptor signaling pathway - Danio rerio (zebrafish); dre04933 AGE-RAGE signaling pathway in diabetic complications - Danio rerio (zebrafish); dre05168 Herpes simplex virus 1 infectio…	PF02864; PF00017; PF12162	STAT protein, DNA binding domain; SH2 domain; STAT1 TAZ2 binding domain
F02_transcript_13876	Allene oxide synthase-lipoxygenase protein [Stylophora pistillata]	1.886	Up		0.00060473	mitochondria							PF00305	Lipoxygenase
F02_transcript_27099	mhc2a, a4; major histocompatibility complex class II integral membrane alpha chain gene; K06752 major histocompatibility complex, class II (A)	1.882	Up	dre04145 Phagosome - Danio rerio (zebrafish); dre04514 Cell adhesion molecules (CAMs) - Danio rerio (zebrafish); dre04672 Intestinal immune network for IgA production - Danio rerio (zebrafish); dre05168 Herpes simplex virus 1 infection - Danio rerio (zebrafish);	0.0057397	cytoplasm				K06752	MHC2; major histocompatibility complex, class II	dre04145 Phagosome - Danio rerio (zebrafish); dre04514 Cell adhesion molecules (CAMs) - Danio rerio (zebrafish); dre04672 Intestinal immune network for IgA production - Danio rerio (zebrafish); dre05168 Herpes simplex virus 1 infection - Danio rerio (zebrafish);	PF00993	Class II histocompatibility antigen, alpha domain
F02_transcript_30243	protein S100-A6 [Sus scrofa]	1.851	Up		0.00082171	cytoplasm							PF01023	S-100/ICaBP type calcium binding domain
F02_transcript_4015	MORC family CW-type zinc finger protein 3-like [Stylophora pistillata]	1.849	Up		8.4626e-05	cytoplasm							PF13589; PF07496	Histidine kinase-, DNA gyrase B-, and HSP90-like ATPase; CW-type Zinc Finger
F02_transcript_28782	Uncharacterized protein	1.847	Up		0.0173798	cytoplasm	GO:0006950 response to stress; GO:0006952 defense response; GO:0009605 response to external stimulus; GO:0009607 response to biotic stimulus; GO:0009617 response to bacterium; GO:0042742 defense response to bacterium; GO:0043207 response to external biotic stimulus; GO:0050830 defense response to Gram-positive bacterium; GO:0050896 response to stimulus; GO:0051704 multi-organism process; GO:00517…	GO:0005576 extracellular region;	GO:0003796 lysozyme activity; GO:0003824 catalytic activity; GO:0004553 hydrolase activity, hydrolyzing O-glycosyl compounds; GO:0016787 hydrolase activity; GO:0016798 hydrolase activity, acting on glycosyl bonds; GO:0061783 peptidoglycan muralytic activity;				PF01464	Transglycosylase SLT domain
F02_transcript_27438	intl2; intelectin 2; K17527 intelectin (A)	1.821	Up		0.0038566	extracellular	GO:0001932 regulation of protein phosphorylation; GO:0001934 positive regulation of protein phosphorylation; GO:0002376 immune system process; GO:0006955 immune response; GO:0006959 humoral immune response; GO:0009605 response to external stimulus; GO:0009607 response to biotic stimulus; GO:0009624 response to nematode; GO:0009893 positive regulation of metabolic process; GO:0009987 cellular proc…	GO:0005576 extracellular region; GO:0005623 cell; GO:0005886 plasma membrane; GO:0005903 brush border; GO:0016020 membrane; GO:0031253 cell projection membrane; GO:0031526 brush border membrane; GO:0032991 macromolecular complex; GO:0042995 cell projection; GO:0043235 receptor complex; GO:0044425 membrane part; GO:0044459 plasma membrane part; GO:0044463 cell projection part; GO:0044464 cell part…	GO:0005488 binding; GO:0005509 calcium ion binding; GO:0005515 protein binding; GO:0030246 carbohydrate binding; GO:0042802 identical protein binding; GO:0043167 ion binding; GO:0043169 cation binding; GO:0046872 metal ion binding; GO:0070492 oligosaccharide binding;	K17527	ITLN; intelectin
F02_transcript_29861	fatty acid-binding protein, heart [Bubalus bubalis]	1.82	Up		0.0157843	cytoplasm	GO:0001816 cytokine production; GO:0001932 regulation of protein phosphorylation; GO:0001933 negative regulation of protein phosphorylation; GO:0003008 system process; GO:0006082 organic acid metabolic process; GO:0006355 regulation of transcription, DNA-templated; GO:0006469 negative regulation of protein kinase activity; GO:0006629 lipid metabolic process; GO:0006631 fatty acid metabolic proces…	GO:0005622 intracellular; GO:0005623 cell; GO:0005634 nucleus; GO:0005654 nucleoplasm; GO:0005737 cytoplasm; GO:0005811 lipid particle; GO:0005829 cytosol; GO:0031974 membrane-enclosed lumen; GO:0031981 nuclear lumen; GO:0043226 organelle; GO:0043227 membrane-bounded organelle; GO:0043228 non-membrane-bounded organelle; GO:0043229 intracellular organelle; GO:0043231 intracellular membrane-bounded…	GO:0005102 receptor binding; GO:0005215 transporter activity; GO:0005319 lipid transporter activity; GO:0005324 long-chain fatty acid transporter activity; GO:0005488 binding; GO:0005504 fatty acid binding; GO:0005515 protein binding; GO:0008289 lipid binding; GO:0031406 carboxylic acid binding; GO:0033293 monocarboxylic acid binding; GO:0036041 long-chain fatty acid binding; GO:0036094 small mol…				PF00061	Lipocalin / cytosolic fatty-acid binding protein family
F02_transcript_14731	keratin, type II cytoskeletal 8-like; K07605 type II keratin, basic (A)	1.818	Up		0.022096	nucleus	GO:0000003 reproduction; GO:0000902 cell morphogenesis; GO:0000904 cell morphogenesis involved in differentiation; GO:0001101 response to acid chemical; GO:0001701 in utero embryonic development; GO:0001890 placenta development; GO:0001892 embryonic placenta development; GO:0003006 developmental process involved in reproduction; GO:0006915 apoptotic process; GO:0006950 response to stress; GO:0006…	GO:0005622 intracellular; GO:0005623 cell; GO:0005737 cytoplasm; GO:0005829 cytosol; GO:0005856 cytoskeleton; GO:0005882 intermediate filament; GO:0005886 plasma membrane; GO:0005911 cell-cell junction; GO:0016010 dystrophin-associated glycoprotein complex; GO:0016020 membrane; GO:0016327 apicolateral plasma membrane; GO:0030016 myofibril; GO:0030017 sarcomere; GO:0030018 Z disc; GO:0030054 cell …	GO:0005488 binding; GO:0005515 protein binding; GO:0044877 macromolecular complex binding; GO:0097110 scaffold protein binding;	K07605	KRT2; type II keratin, basic
F02_transcript_29974	Uncharacterized protein	1.815	Up		0.0020628	extracellular		GO:0005576 extracellular region;		K23418			PF00050	Kazal-type serine protease inhibitor domain
F02_transcript_14704	L-amino-acid oxidase-like; K03334 L-amino-acid oxidase [EC:1.4.3.2] (A)	1.814	Up	dre00250 Alanine, aspartate and glutamate metabolism - Danio rerio (zebrafish); dre00270 Cysteine and methionine metabolism - Danio rerio (zebrafish); dre00280 Valine, leucine and isoleucine degradation - Danio rerio (zebrafish); dre00350 Tyrosine metabolism - Danio rerio (zebrafish); dre00360 Phenylalanine metabolism - Danio rerio (zebrafish); dre00380 Tryptophan metabolism - Danio rerio (zebraf…	0.0036557	extracellular				K03334	IL4I1; L-amino-acid oxidase [EC:1.4.3.2]	dre00250 Alanine, aspartate and glutamate metabolism - Danio rerio (zebrafish); dre00270 Cysteine and methionine metabolism - Danio rerio (zebrafish); dre00280 Valine, leucine and isoleucine degradation - Danio rerio (zebrafish); dre00350 Tyrosine metabolism - Danio rerio (zebrafish); dre00360 Phenylalanine metabolism - Danio rerio (zebrafish); dre00380 Tryptophan metabolism - Danio rerio (zebraf…	PF01593	Flavin containing amine oxidoreductase
F02_transcript_11475	gelsolin-like; K05768 gelsolin (A)	1.805	Up	dre04810 Regulation of actin cytoskeleton - Danio rerio (zebrafish);	0.003837	nucleus	GO:0001101 response to acid chemical; GO:0001775 cell activation; GO:0002252 immune effector process; GO:0002263 cell activation involved in immune response; GO:0002274 myeloid leukocyte activation; GO:0002275 myeloid cell activation involved in immune response; GO:0002283 neutrophil activation involved in immune response; GO:0002366 leukocyte activation involved in immune response; GO:0002376 im…	GO:0001726 ruffle; GO:0002102 podosome; GO:0005576 extracellular region; GO:0005615 extracellular space; GO:0005622 intracellular; GO:0005623 cell; GO:0005737 cytoplasm; GO:0005829 cytosol; GO:0005856 cytoskeleton; GO:0005886 plasma membrane; GO:0005938 cell cortex; GO:0012505 endomembrane system; GO:0015629 actin cytoskeleton; GO:0016020 membrane; GO:0016528 sarcoplasm; GO:0030027 lamellipodium;…	GO:0003779 actin binding; GO:0005488 binding; GO:0005509 calcium ion binding; GO:0005515 protein binding; GO:0008092 cytoskeletal protein binding; GO:0017022 myosin binding; GO:0043167 ion binding; GO:0043169 cation binding; GO:0045159 myosin II binding; GO:0046872 metal ion binding;	K05768	GSN; gelsolin	dre04810 Regulation of actin cytoskeleton - Danio rerio (zebrafish);	PF00626	Gelsolin repeat
F02_transcript_26908	glutathione S-transferase omega-1-like; K00799 glutathione S-transferase [EC:2.5.1.18] (A)	1.804	Up	dre00480 Glutathione metabolism - Danio rerio (zebrafish); dre00980 Metabolism of xenobiotics by cytochrome P450 - Danio rerio (zebrafish); dre00982 Drug metabolism - cytochrome P450 - Danio rerio (zebrafish); dre00983 Drug metabolism - other enzymes - Danio rerio (zebrafish); dre01100 Metabolic pathways - Danio rerio (zebrafish);	7.6033e-05	mitochondria	GO:0000302 response to reactive oxygen species; GO:0005975 carbohydrate metabolic process; GO:0005996 monosaccharide metabolic process; GO:0006082 organic acid metabolic process; GO:0006518 peptide metabolic process; GO:0006575 cellular modified amino acid metabolic process; GO:0006725 cellular aromatic compound metabolic process; GO:0006726 eye pigment biosynthetic process; GO:0006728 pteridine …	GO:0005576 extracellular region; GO:0005604 basement membrane; GO:0005622 intracellular; GO:0005623 cell; GO:0005634 nucleus; GO:0005635 nuclear envelope; GO:0005737 cytoplasm; GO:0005739 mitochondrion; GO:0005829 cytosol; GO:0012505 endomembrane system; GO:0016020 membrane; GO:0030424 axon; GO:0031012 extracellular matrix; GO:0031090 organelle membrane; GO:0031965 nuclear membrane; GO:0031967 or…	GO:0003824 catalytic activity; GO:0004364 glutathione transferase activity; GO:0004734 pyrimidodiazepine synthase activity; GO:0005488 binding; GO:0005515 protein binding; GO:0015036 disulfide oxidoreductase activity; GO:0015037 peptide disulfide oxidoreductase activity; GO:0015038 glutathione disulfide oxidoreductase activity; GO:0016209 antioxidant activity; GO:0016491 oxidoreductase activity; …	K00799	GST, gst; glutathione S-transferase [EC:2.5.1.18]	dre00480 Glutathione metabolism - Danio rerio (zebrafish); dre00980 Metabolism of xenobiotics by cytochrome P450 - Danio rerio (zebrafish); dre00982 Drug metabolism - cytochrome P450 - Danio rerio (zebrafish); dre00983 Drug metabolism - other enzymes - Danio rerio (zebrafish); dre01100 Metabolic pathways - Danio rerio (zebrafish);	PF13417; PF00043	Glutathione S-transferase, N-terminal domain; Glutathione S-transferase, C-terminal domain
F02_transcript_9013	probable ATP-dependent RNA helicase DHX58-like; K12649 ATP-dependent RNA helicase DHX58 [EC:3.6.3.14] (A)	1.788	Up	dre04622 RIG-I-like receptor signaling pathway - Danio rerio (zebrafish);	0.00032398	cytoplasm	GO:0001817 regulation of cytokine production; GO:0001818 negative regulation of cytokine production; GO:0001819 positive regulation of cytokine production; GO:0002682 regulation of immune system process; GO:0002683 negative regulation of immune system process; GO:0002684 positive regulation of immune system process; GO:0002697 regulation of immune effector process; GO:0002698 negative regulation …	GO:0005622 intracellular; GO:0005623 cell; GO:0005737 cytoplasm; GO:0044424 intracellular part; GO:0044464 cell part;	GO:0003676 nucleic acid binding; GO:0003723 RNA binding; GO:0003725 double-stranded RNA binding; GO:0003727 single-stranded RNA binding; GO:0005488 binding; GO:0008270 zinc ion binding; GO:0043167 ion binding; GO:0043169 cation binding; GO:0046872 metal ion binding; GO:0046914 transition metal ion binding; GO:0097159 organic cyclic compound binding; GO:1901363 heterocyclic compound binding;	K12649	DHX58, LGP2; ATP-dependent RNA helicase DHX58 [EC:3.6.3.14]	dre04622 RIG-I-like receptor signaling pathway - Danio rerio (zebrafish);	PF11648	C-terminal domain of RIG-I
F02_transcript_25607	serpinb14, im:7148243, si:ch73-303g23.4; serpin peptidase inhibitor, clade B (ovalbumin), member 14; K13963 serpin B (A)	1.788	Up		0.000122942	cytoplasm	GO:0000003 reproduction; GO:0001775 cell activation; GO:0001817 regulation of cytokine production; GO:0001819 positive regulation of cytokine production; GO:0001910 regulation of leukocyte mediated cytotoxicity; GO:0001911 negative regulation of leukocyte mediated cytotoxicity; GO:0002252 immune effector process; GO:0002253 activation of immune response; GO:0002263 cell activation involved in imm…	GO:0005576 extracellular region; GO:0005615 extracellular space; GO:0005622 intracellular; GO:0005623 cell; GO:0005634 nucleus; GO:0005654 nucleoplasm; GO:0005737 cytoplasm; GO:0005794 Golgi apparatus; GO:0005829 cytosol; GO:0005886 plasma membrane; GO:0012505 endomembrane system; GO:0012506 vesicle membrane; GO:0016020 membrane; GO:0030141 secretory granule; GO:0030659 cytoplasmic vesicle membra…	GO:0002020 protease binding; GO:0004857 enzyme inhibitor activity; GO:0004866 endopeptidase inhibitor activity; GO:0004867 serine-type endopeptidase inhibitor activity; GO:0004869 cysteine-type endopeptidase inhibitor activity; GO:0005488 binding; GO:0005515 protein binding; GO:0019899 enzyme binding; GO:0030234 enzyme regulator activity; GO:0030414 peptidase inhibitor activity; GO:0043027 cystei…	K13963	SERPINB; serpin B		PF00079	Serpin (serine protease inhibitor)
F02_transcript_3408	Beta-galactosidase-1-like protein 3 [Stylophora pistillata]	1.787	Up		0.00136473	endoplasmic reticulum		GO:0005622 intracellular; GO:0005623 cell; GO:0005737 cytoplasm; GO:0005773 vacuole; GO:0043226 organelle; GO:0043227 membrane-bounded organelle; GO:0043229 intracellular organelle; GO:0043231 intracellular membrane-bounded organelle; GO:0044424 intracellular part; GO:0044444 cytoplasmic part; GO:0044464 cell part;	GO:0003824 catalytic activity; GO:0004553 hydrolase activity, hydrolyzing O-glycosyl compounds; GO:0004565 beta-galactosidase activity; GO:0015925 galactosidase activity; GO:0016787 hydrolase activity; GO:0016798 hydrolase activity, acting on glycosyl bonds;				PF01301	Glycosyl hydrolases family 35
F02_transcript_17013	calreticulin-like; K08057 calreticulin (A)	1.755	Up	dre04141 Protein processing in endoplasmic reticulum - Danio rerio (zebrafish); dre04145 Phagosome - Danio rerio (zebrafish); dre05168 Herpes simplex virus 1 infection - Danio rerio (zebrafish);	0.048821	extracellular	GO:0000003 reproduction; GO:0000122 negative regulation of transcription from RNA polymerase II promoter; GO:0002376 immune system process; GO:0002396 MHC protein complex assembly; GO:0002397 MHC class I protein complex assembly; GO:0002474 antigen processing and presentation of peptide antigen via MHC class I; GO:0002478 antigen processing and presentation of exogenous peptide antigen; GO:000247…	GO:0001669 acrosomal vesicle; GO:0005576 extracellular region; GO:0005615 extracellular space; GO:0005622 intracellular; GO:0005623 cell; GO:0005634 nucleus; GO:0005635 nuclear envelope; GO:0005737 cytoplasm; GO:0005783 endoplasmic reticulum; GO:0005788 endoplasmic reticulum lumen; GO:0005789 endoplasmic reticulum membrane; GO:0005790 smooth endoplasmic reticulum; GO:0005793 endoplasmic reticulum…	GO:0001846 opsonin binding; GO:0001848 complement binding; GO:0001849 complement component C1q binding; GO:0003676 nucleic acid binding; GO:0003677 DNA binding; GO:0003723 RNA binding; GO:0003729 mRNA binding; GO:0005102 receptor binding; GO:0005178 integrin binding; GO:0005488 binding; GO:0005506 iron ion binding; GO:0005509 calcium ion binding; GO:0005515 protein binding; GO:0008134 transcripti…	K08057	CALR; calreticulin	dre04141 Protein processing in endoplasmic reticulum - Danio rerio (zebrafish); dre04145 Phagosome - Danio rerio (zebrafish); dre05168 Herpes simplex virus 1 infection - Danio rerio (zebrafish);
F02_transcript_24840	tumor-associated calcium signal transducer 1 precursor [Bos taurus]	1.729	Up		0.00149701	extracellular	GO:0001655 urogenital system development; GO:0001657 ureteric bud development; GO:0001822 kidney development; GO:0001823 mesonephros development; GO:0002009 morphogenesis of an epithelium; GO:0002376 immune system process; GO:0003008 system process; GO:0006355 regulation of transcription, DNA-templated; GO:0006357 regulation of transcription from RNA polymerase II promoter; GO:0006928 movement of…	GO:0005576 extracellular region; GO:0005615 extracellular space; GO:0005622 intracellular; GO:0005623 cell; GO:0005634 nucleus; GO:0005737 cytoplasm; GO:0005829 cytosol; GO:0005886 plasma membrane; GO:0005887 integral component of plasma membrane; GO:0005911 cell-cell junction; GO:0005923 bicellular tight junction; GO:0009925 basal plasma membrane; GO:0009986 cell surface; GO:0016020 membrane; GO…	GO:0005488 binding; GO:0005515 protein binding; GO:0038023 signaling receptor activity; GO:0044877 macromolecular complex binding; GO:0045296 cadherin binding; GO:0050839 cell adhesion molecule binding; GO:0060089 molecular transducer activity; GO:0098631 protein binding involved in cell adhesion; GO:0098632 protein binding involved in cell-cell adhesion; GO:0098641 cadherin binding involved in c…	K06737	EPCAM, TACSTD1, CD326; epithelial cell adhesion molecule		PF00086	Thyroglobulin type-1 repeat
F02_transcript_10857	gda, zgc:112282; guanine deaminase (EC:3.5.4.3); K01487 guanine deaminase [EC:3.5.4.3] (A)	1.722	Up	dre00230 Purine metabolism - Danio rerio (zebrafish); dre01100 Metabolic pathways - Danio rerio (zebrafish);	9.1833e-07	cytoplasm	GO:0006139 nucleobase-containing compound metabolic process; GO:0006144 purine nucleobase metabolic process; GO:0006163 purine nucleotide metabolic process; GO:0006195 purine nucleotide catabolic process; GO:0006725 cellular aromatic compound metabolic process; GO:0006726 eye pigment biosynthetic process; GO:0006753 nucleoside phosphate metabolic process; GO:0006793 phosphorus metabolic process; …	GO:0005622 intracellular; GO:0005623 cell; GO:0005737 cytoplasm; GO:0005829 cytosol; GO:0044424 intracellular part; GO:0044444 cytoplasmic part; GO:0044464 cell part;	GO:0003824 catalytic activity; GO:0004153 dihydropterin deaminase activity; GO:0005488 binding; GO:0008270 zinc ion binding; GO:0008892 guanine deaminase activity; GO:0016787 hydrolase activity; GO:0016810 hydrolase activity, acting on carbon-nitrogen (but not peptide) bonds; GO:0016814 hydrolase activity, acting on carbon-nitrogen (but not peptide) bonds, in cyclic amidines; GO:0019239 deaminase…	K01487	E3.5.4.3, guaD; guanine deaminase [EC:3.5.4.3]	dre00230 Purine metabolism - Danio rerio (zebrafish); dre01100 Metabolic pathways - Danio rerio (zebrafish);	PF01979	Amidohydrolase family
F02_transcript_28497	Cysteine-rich secretory protein 2 [Zootermopsis nevadensis]	1.698	Up		0.0029971	extracellular	GO:0001775 cell activation; GO:0002252 immune effector process; GO:0002263 cell activation involved in immune response; GO:0002274 myeloid leukocyte activation; GO:0002275 myeloid cell activation involved in immune response; GO:0002283 neutrophil activation involved in immune response; GO:0002366 leukocyte activation involved in immune response; GO:0002376 immune system process; GO:0002443 leukoc…	GO:0005576 extracellular region; GO:0005615 extracellular space; GO:0005622 intracellular; GO:0005623 cell; GO:0005737 cytoplasm; GO:0012505 endomembrane system; GO:0030133 transport vesicle; GO:0030141 secretory granule; GO:0031012 extracellular matrix; GO:0031410 cytoplasmic vesicle; GO:0031974 membrane-enclosed lumen; GO:0031982 vesicle; GO:0031983 vesicle lumen; GO:0034774 secretory granule l…		K19919	CRISP; cysteine-rich secretory protein		PF00188; PF08562	Cysteine-rich secretory protein family; Crisp
F02_transcript_59	mucin-5AC-like [Stylophora pistillata]	1.681	Up		0.00052016	extracellular							PF08742; PF01826; PF12714	C8 domain; Trypsin Inhibitor like cysteine rich domain; TILa domain
F02_transcript_27727	nt5c1bb, fl02f11, si:ch211-59d15.1, wu:fl02f11; 5'-nucleotidase, cytosolic IB b; K01081 5'-nucleotidase [EC:3.1.3.5] (A)	1.66	Up	dre00230 Purine metabolism - Danio rerio (zebrafish); dre00240 Pyrimidine metabolism - Danio rerio (zebrafish); dre00760 Nicotinate and nicotinamide metabolism - Danio rerio (zebrafish); dre01100 Metabolic pathways - Danio rerio (zebrafish);	0.00040464	cytoplasm	GO:0006139 nucleobase-containing compound metabolic process; GO:0006163 purine nucleotide metabolic process; GO:0006195 purine nucleotide catabolic process; GO:0006725 cellular aromatic compound metabolic process; GO:0006753 nucleoside phosphate metabolic process; GO:0006793 phosphorus metabolic process; GO:0006796 phosphate-containing compound metabolic process; GO:0006807 nitrogen compound meta…	GO:0005622 intracellular; GO:0005623 cell; GO:0005737 cytoplasm; GO:0005829 cytosol; GO:0044424 intracellular part; GO:0044444 cytoplasmic part; GO:0044464 cell part;	GO:0003824 catalytic activity; GO:0008252 nucleotidase activity; GO:0008253 5'-nucleotidase activity; GO:0016787 hydrolase activity; GO:0016788 hydrolase activity, acting on ester bonds; GO:0016791 phosphatase activity; GO:0042578 phosphoric ester hydrolase activity;	K01081	E3.1.3.5; 5'-nucleotidase [EC:3.1.3.5]	dre00230 Purine metabolism - Danio rerio (zebrafish); dre00240 Pyrimidine metabolism - Danio rerio (zebrafish); dre00760 Nicotinate and nicotinamide metabolism - Danio rerio (zebrafish); dre01100 Metabolic pathways - Danio rerio (zebrafish);
F02_transcript_25216	apolipoprotein D precursor [Rattus norvegicus]	1.659	Up		0.00138008	extracellular	GO:0000302 response to reactive oxygen species; GO:0001525 angiogenesis; GO:0001568 blood vessel development; GO:0001817 regulation of cytokine production; GO:0001818 negative regulation of cytokine production; GO:0001944 vasculature development; GO:0001952 regulation of cell-matrix adhesion; GO:0001953 negative regulation of cell-matrix adhesion; GO:0002682 regulation of immune system process; G…	GO:0005576 extracellular region; GO:0005615 extracellular space; GO:0005622 intracellular; GO:0005623 cell; GO:0005737 cytoplasm; GO:0005783 endoplasmic reticulum; GO:0005829 cytosol; GO:0005840 ribosome; GO:0012505 endomembrane system; GO:0022626 cytosolic ribosome; GO:0030425 dendrite; GO:0032991 macromolecular complex; GO:0036477 somatodendritic compartment; GO:0042995 cell projection; GO:0043…	GO:0005215 transporter activity; GO:0005319 lipid transporter activity; GO:0005488 binding; GO:0005496 steroid binding; GO:0008289 lipid binding; GO:0015485 cholesterol binding; GO:0032934 sterol binding; GO:0036094 small molecule binding; GO:0043178 alcohol binding; GO:0097159 organic cyclic compound binding;	K03098	APOD; apolipoprotein D and lipocalin family protein		PF08212	Lipocalin-like domain
F02_transcript_108	trip12, TRIP-12, im:7149446, si:ch211-272f3.4; thyroid hormone receptor interactor 12; K10590 E3 ubiquitin-protein ligase TRIP12 [EC:6.3.2.19] (A)	1.651	Up	dre04120 Ubiquitin mediated proteolysis - Danio rerio (zebrafish);	0.00135629	nucleus	GO:0000209 protein polyubiquitination; GO:0006282 regulation of DNA repair; GO:0006464 cellular protein modification process; GO:0006508 proteolysis; GO:0006511 ubiquitin-dependent protein catabolic process; GO:0006807 nitrogen compound metabolic process; GO:0006950 response to stress; GO:0006974 cellular response to DNA damage stimulus; GO:0008152 metabolic process; GO:0009056 catabolic process;…	GO:0005622 intracellular; GO:0005623 cell; GO:0005634 nucleus; GO:0005654 nucleoplasm; GO:0005737 cytoplasm; GO:0005829 cytosol; GO:0016604 nuclear body; GO:0016607 nuclear speck; GO:0031974 membrane-enclosed lumen; GO:0031981 nuclear lumen; GO:0043226 organelle; GO:0043227 membrane-bounded organelle; GO:0043229 intracellular organelle; GO:0043231 intracellular membrane-bounded organelle; GO:0043…	GO:0003824 catalytic activity; GO:0004842 ubiquitin-protein transferase activity; GO:0005102 receptor binding; GO:0005488 binding; GO:0005515 protein binding; GO:0008134 transcription factor binding; GO:0016740 transferase activity; GO:0019787 ubiquitin-like protein transferase activity; GO:0035257 nuclear hormone receptor binding; GO:0046966 thyroid hormone receptor binding; GO:0051427 hormone r…	K10590	TRIP12; E3 ubiquitin-protein ligase TRIP12 [EC:2.3.2.26]	dre04120 Ubiquitin mediated proteolysis - Danio rerio (zebrafish);	PF00632	HECT-domain (ubiquitin-transferase)
F02_transcript_9818	uap1l1, zgc:56509; UDP-N-acetylglucosamine pyrophosphorylase 1, like 1 (EC:2.7.7.-); K00972 UDP-N-acetylglucosamine/UDP-N-acetylgalactosamine diphosphorylase [EC:2.7.7.23 2.7.7.83] (A)	1.647	Up	dre00520 Amino sugar and nucleotide sugar metabolism - Danio rerio (zebrafish); dre01100 Metabolic pathways - Danio rerio (zebrafish);	0.0147968	cytoplasm	GO:0001700 embryonic development via the syncytial blastoderm; GO:0001838 embryonic epithelial tube formation; GO:0002009 morphogenesis of an epithelium; GO:0006022 aminoglycan metabolic process; GO:0006023 aminoglycan biosynthetic process; GO:0006030 chitin metabolic process; GO:0006031 chitin biosynthetic process; GO:0006034 cuticle chitin metabolic process; GO:0006035 cuticle chitin biosynthet…	GO:0005622 intracellular; GO:0005623 cell; GO:0005737 cytoplasm; GO:0005829 cytosol; GO:0044424 intracellular part; GO:0044444 cytoplasmic part; GO:0044464 cell part;	GO:0003824 catalytic activity; GO:0003977 UDP-N-acetylglucosamine diphosphorylase activity; GO:0016740 transferase activity; GO:0016772 transferase activity, transferring phosphorus-containing groups; GO:0016779 nucleotidyltransferase activity; GO:0070569 uridylyltransferase activity;	K00972	UAP1; UDP-N-acetylglucosamine/UDP-N-acetylgalactosamine diphosphorylase [EC:2.7.7.23 2.7.7.83]	dre00520 Amino sugar and nucleotide sugar metabolism - Danio rerio (zebrafish); dre01100 Metabolic pathways - Danio rerio (zebrafish);
F02_transcript_886	canx, wu:fe06b12, zgc:63524; calnexin; K08054 calnexin (A)	1.639	Up	dre04141 Protein processing in endoplasmic reticulum - Danio rerio (zebrafish); dre04145 Phagosome - Danio rerio (zebrafish);	0.0159164	endoplasmic reticulum	GO:0001894 tissue homeostasis; GO:0001895 retina homeostasis; GO:0002376 immune system process; GO:0002474 antigen processing and presentation of peptide antigen via MHC class I; GO:0002478 antigen processing and presentation of exogenous peptide antigen; GO:0002495 antigen processing and presentation of peptide antigen via MHC class II; GO:0002504 antigen processing and presentation of peptide o…	GO:0005622 intracellular; GO:0005623 cell; GO:0005737 cytoplasm; GO:0005783 endoplasmic reticulum; GO:0005788 endoplasmic reticulum lumen; GO:0005789 endoplasmic reticulum membrane; GO:0005790 smooth endoplasmic reticulum; GO:0005840 ribosome; GO:0005886 plasma membrane; GO:0012505 endomembrane system; GO:0016020 membrane; GO:0016021 integral component of membrane; GO:0030176 integral component o…	GO:0005102 receptor binding; GO:0005488 binding; GO:0005509 calcium ion binding; GO:0005515 protein binding; GO:0034185 apolipoprotein binding; GO:0035254 glutamate receptor binding; GO:0035255 ionotropic glutamate receptor binding; GO:0043167 ion binding; GO:0043169 cation binding; GO:0046872 metal ion binding; GO:0051082 unfolded protein binding;	K08054	CANX; calnexin	dre04141 Protein processing in endoplasmic reticulum - Danio rerio (zebrafish); dre04145 Phagosome - Danio rerio (zebrafish);
F02_transcript_3379	band 3 anion transport protein [Danio rerio]	1.637	Up		0.00151854	plasma membrane							PF07565	Band 3 cytoplasmic domain
F02_transcript_22289	gosr2, wu:fc33b02, zgc:64068; golgi SNAP receptor complex member 2; K08496 golgi SNAP receptor complex member 2 (A)	1.636	Up	dre04130 SNARE interactions in vesicular transport - Danio rerio (zebrafish);	0.00038149	peroxisome	GO:0006605 protein targeting; GO:0006623 protein targeting to vacuole; GO:0006810 transport; GO:0006886 intracellular protein transport; GO:0006888 ER to Golgi vesicle-mediated transport; GO:0006891 intra-Golgi vesicle-mediated transport; GO:0006892 post-Golgi vesicle-mediated transport; GO:0006896 Golgi to vacuole transport; GO:0006900 membrane budding; GO:0006901 vesicle coating; GO:0006903 ves…	GO:0000139 Golgi membrane; GO:0005622 intracellular; GO:0005623 cell; GO:0005737 cytoplasm; GO:0005768 endosome; GO:0005770 late endosome; GO:0005783 endoplasmic reticulum; GO:0005789 endoplasmic reticulum membrane; GO:0005793 endoplasmic reticulum-Golgi intermediate compartment; GO:0005794 Golgi apparatus; GO:0005798 Golgi-associated vesicle; GO:0010008 endosome membrane; GO:0012505 endomembrane…	GO:0000149 SNARE binding; GO:0005484 SNAP receptor activity; GO:0005488 binding; GO:0005515 protein binding;	K08496	GOSR2, BOS1; golgi SNAP receptor complex member 2	dre04130 SNARE interactions in vesicular transport - Danio rerio (zebrafish);	PF12352	Snare region anchored in the vesicle membrane C-terminus
F02_transcript_8640	myb; v-myb avian myeloblastosis viral oncogene homolog; K09420 myb proto-oncogene protein (A)	1.633	Up		0.0019999	nucleus	GO:0000082 G1/S transition of mitotic cell cycle; GO:0000122 negative regulation of transcription from RNA polymerase II promoter; GO:0000278 mitotic cell cycle; GO:0001701 in utero embryonic development; GO:0001775 cell activation; GO:0002376 immune system process; GO:0002520 immune system development; GO:0002521 leukocyte differentiation; GO:0002682 regulation of immune system process; GO:00026…	GO:0005622 intracellular; GO:0005623 cell; GO:0005634 nucleus; GO:0005654 nucleoplasm; GO:0005737 cytoplasm; GO:0005829 cytosol; GO:0016363 nuclear matrix; GO:0031974 membrane-enclosed lumen; GO:0031981 nuclear lumen; GO:0034399 nuclear periphery; GO:0043226 organelle; GO:0043227 membrane-bounded organelle; GO:0043229 intracellular organelle; GO:0043231 intracellular membrane-bounded organelle; G…	GO:0000976 transcription regulatory region sequence-specific DNA binding; GO:0000977 RNA polymerase II regulatory region sequence-specific DNA binding; GO:0000978 RNA polymerase II core promoter proximal region sequence-specific DNA binding; GO:0000981 RNA polymerase II transcription factor activity, sequence-specific DNA binding; GO:0000982 transcription factor activity, RNA polymerase II core p…	K09420	MYB, C-MYB; transcriptional activator Myb		PF00249	Myb-like DNA-binding domain
F02_transcript_24918	interferon-induced protein with tetratricopeptide repeats 2, partial [Bos taurus]	1.626	Up		0.00082168	cytoplasm
F02_transcript_1715	DDX58; DEAD (Asp-Glu-Ala-Asp) box polypeptide 58; K12646 ATP-dependent RNA helicase DDX58 [EC:3.6.3.14] (A)	1.61	Up	dre04622 RIG-I-like receptor signaling pathway - Danio rerio (zebrafish); dre04623 Cytosolic DNA-sensing pathway - Danio rerio (zebrafish); dre05168 Herpes simplex virus 1 infection - Danio rerio (zebrafish);	0.00029934	cytoplasm	GO:0000003 reproduction; GO:0000578 embryonic axis specification; GO:0001817 regulation of cytokine production; GO:0001818 negative regulation of cytokine production; GO:0001819 positive regulation of cytokine production; GO:0002218 activation of innate immune response; GO:0002221 pattern recognition receptor signaling pathway; GO:0002230 positive regulation of defense response to virus by host; …	GO:0000228 nuclear chromosome; GO:0000793 condensed chromosome; GO:0000794 condensed nuclear chromosome; GO:0001726 ruffle; GO:0005622 intracellular; GO:0005623 cell; GO:0005634 nucleus; GO:0005694 chromosome; GO:0005737 cytoplasm; GO:0005829 cytosol; GO:0005856 cytoskeleton; GO:0005886 plasma membrane; GO:0005911 cell-cell junction; GO:0005923 bicellular tight junction; GO:0015629 actin cytoskel…	GO:0003676 nucleic acid binding; GO:0003677 DNA binding; GO:0003690 double-stranded DNA binding; GO:0003723 RNA binding; GO:0003725 double-stranded RNA binding; GO:0003727 single-stranded RNA binding; GO:0003824 catalytic activity; GO:0005488 binding; GO:0005515 protein binding; GO:0008186 RNA-dependent ATPase activity; GO:0008270 zinc ion binding; GO:0016462 pyrophosphatase activity; GO:0016787 …	K12646	DDX58, RIG-I; ATP-dependent RNA helicase DDX58 [EC:3.6.3.14]	dre04622 RIG-I-like receptor signaling pathway - Danio rerio (zebrafish); dre04623 Cytosolic DNA-sensing pathway - Danio rerio (zebrafish); dre05168 Herpes simplex virus 1 infection - Danio rerio (zebrafish);	PF00270; PF11648	DEAD/DEAH box helicase; C-terminal domain of RIG-I
F02_transcript_18415	ethanolamine-phosphate phospho-lyase-like; K14286 ethanolamine-phosphate phospho-lyase [EC:4.2.3.2] (A)	1.608	Up	dre00564 Glycerophospholipid metabolism - Danio rerio (zebrafish); dre01100 Metabolic pathways - Danio rerio (zebrafish);	0.00042434	cytoplasm	GO:0006629 lipid metabolic process; GO:0006644 phospholipid metabolic process; GO:0006646 phosphatidylethanolamine biosynthetic process; GO:0006650 glycerophospholipid metabolic process; GO:0006793 phosphorus metabolic process; GO:0006796 phosphate-containing compound metabolic process; GO:0008152 metabolic process; GO:0008610 lipid biosynthetic process; GO:0008654 phospholipid biosynthetic proce…	GO:0005622 intracellular; GO:0005623 cell; GO:0005737 cytoplasm; GO:0005739 mitochondrion; GO:0005759 mitochondrial matrix; GO:0031974 membrane-enclosed lumen; GO:0043226 organelle; GO:0043227 membrane-bounded organelle; GO:0043229 intracellular organelle; GO:0043231 intracellular membrane-bounded organelle; GO:0043233 organelle lumen; GO:0044422 organelle part; GO:0044424 intracellular part; GO:…	GO:0003824 catalytic activity; GO:0005488 binding; GO:0005515 protein binding; GO:0008144 drug binding; GO:0008453 alanine-glyoxylate transaminase activity; GO:0008483 transaminase activity; GO:0016740 transferase activity; GO:0016769 transferase activity, transferring nitrogenous groups; GO:0016829 lyase activity; GO:0016835 carbon-oxygen lyase activity; GO:0016838 carbon-oxygen lyase activity, …	K14286	AGXT2L1, ETNPPL; ethanolamine-phosphate phospho-lyase [EC:4.2.3.2]	dre00564 Glycerophospholipid metabolism - Danio rerio (zebrafish); dre01100 Metabolic pathways - Danio rerio (zebrafish);	PF00202	Aminotransferase class-III
F02_transcript_166	OBSCN; obscurin, cytoskeletal calmodulin and titin-interacting RhoGEF; K17531 Obscurin-RhoGEF [EC:2.7.11.1] (A)	1.603	Up		0.0070589	cytoplasm				K06514	THY1, CD90; Thy-1 cell surface antigen
F02_transcript_27847	PYCARD; PYD and CARD domain containing; K12799 apoptosis-associated speck-like protein containing a CARD (A)	1.603	Up		0.00165607	cytoplasm	GO:0001773 myeloid dendritic cell activation; GO:0001775 cell activation; GO:0001816 cytokine production; GO:0001817 regulation of cytokine production; GO:0001818 negative regulation of cytokine production; GO:0001819 positive regulation of cytokine production; GO:0001932 regulation of protein phosphorylation; GO:0001933 negative regulation of protein phosphorylation; GO:0001934 positive regulati…	GO:0000323 lytic vacuole; GO:0005576 extracellular region; GO:0005622 intracellular; GO:0005623 cell; GO:0005634 nucleus; GO:0005730 nucleolus; GO:0005737 cytoplasm; GO:0005739 mitochondrion; GO:0005764 lysosome; GO:0005766 primary lysosome; GO:0005773 vacuole; GO:0005775 vacuolar lumen; GO:0005783 endoplasmic reticulum; GO:0005829 cytosol; GO:0008385 IkappaB kinase complex; GO:0012505 endomembra…	GO:0002020 protease binding; GO:0003824 catalytic activity; GO:0004175 endopeptidase activity; GO:0004197 cysteine-type endopeptidase activity; GO:0005102 receptor binding; GO:0005126 cytokine receptor binding; GO:0005138 interleukin-6 receptor binding; GO:0005488 binding; GO:0005515 protein binding; GO:0005523 tropomyosin binding; GO:0008047 enzyme activator activity; GO:0008092 cytoskeletal pro…				PF02758; PF00619	PAAD/DAPIN/Pyrin domain; Caspase recruitment domain
F02_transcript_15360	lysosome-associated membrane glycoprotein 1-like; K06501 CD68 antigen (A)	1.603	Up	dre04142 Lysosome - Danio rerio (zebrafish);	0.0064393	plasma membrane	GO:0009987 cellular process; GO:0010033 response to organic substance; GO:0042221 response to chemical; GO:0050896 response to stimulus; GO:0051716 cellular response to stimulus; GO:0070887 cellular response to chemical stimulus; GO:0071310 cellular response to organic substance;	GO:0000323 lytic vacuole; GO:0005622 intracellular; GO:0005623 cell; GO:0005737 cytoplasm; GO:0005764 lysosome; GO:0005765 lysosomal membrane; GO:0005768 endosome; GO:0005773 vacuole; GO:0005774 vacuolar membrane; GO:0005886 plasma membrane; GO:0010008 endosome membrane; GO:0012505 endomembrane system; GO:0016020 membrane; GO:0031090 organelle membrane; GO:0031410 cytoplasmic vesicle; GO:0031982 …		K06501	CD68; CD68 antigen	dre04142 Lysosome - Danio rerio (zebrafish);
F02_transcript_13149	tetraspanin-7-like; K06571 tetraspanin-7 (A)	1.602	Up		0.00129949	plasma membrane	GO:0001817 regulation of cytokine production; GO:0002682 regulation of immune system process; GO:0002683 negative regulation of immune system process; GO:0002697 regulation of immune effector process; GO:0002698 negative regulation of immune effector process; GO:0002831 regulation of response to biotic stimulus; GO:0002832 negative regulation of response to biotic stimulus; GO:0007154 cell commun…	GO:0005623 cell; GO:0005886 plasma membrane; GO:0005887 integral component of plasma membrane; GO:0016020 membrane; GO:0016021 integral component of membrane; GO:0031224 intrinsic component of membrane; GO:0031226 intrinsic component of plasma membrane; GO:0044425 membrane part; GO:0044459 plasma membrane part; GO:0044464 cell part; GO:0071944 cell periphery;		K06571	TSPAN7, TM4SF2, MXS1, CD231; tetraspanin-7
F02_transcript_17055	Uncharacterized protein	1.6	Up		0.0141182	nucleus	GO:0007155 cell adhesion; GO:0007160 cell-matrix adhesion; GO:0022610 biological adhesion; GO:0031589 cell-substrate adhesion;	GO:0005623 cell; GO:0009986 cell surface; GO:0044464 cell part;		K20733	MSLN; mesothelin
F02_transcript_3476	stip1, im:6911394, wu:fb36h09, wu:fi33b05, zgc:92133; stress-induced phosphoprotein 1; K09553 stress-induced-phosphoprotein 1 (A)	1.591	Up		0.0114409	cytoplasm	GO:0000003 reproduction; GO:0006950 response to stress; GO:0007275 multicellular organism development; GO:0007568 aging; GO:0008340 determination of adult lifespan; GO:0009266 response to temperature stimulus; GO:0009408 response to heat; GO:0009628 response to abiotic stimulus; GO:0010259 multicellular organism aging; GO:0032501 multicellular organismal process; GO:0032502 developmental process;…	GO:0005622 intracellular; GO:0005623 cell; GO:0005634 nucleus; GO:0005737 cytoplasm; GO:0005794 Golgi apparatus; GO:0005829 cytosol; GO:0012505 endomembrane system; GO:0032991 macromolecular complex; GO:0043209 myelin sheath; GO:0043226 organelle; GO:0043227 membrane-bounded organelle; GO:0043229 intracellular organelle; GO:0043231 intracellular membrane-bounded organelle; GO:0044424 intracellula…	GO:0004857 enzyme inhibitor activity; GO:0005488 binding; GO:0005515 protein binding; GO:0008022 protein C-terminus binding; GO:0030234 enzyme regulator activity; GO:0030544 Hsp70 protein binding; GO:0031072 heat shock protein binding; GO:0042030 ATPase inhibitor activity; GO:0051087 chaperone binding; GO:0051879 Hsp90 protein binding; GO:0060589 nucleoside-triphosphatase regulator activity; GO:0…	K09553	STIP1; stress-induced-phosphoprotein 1
F02_transcript_19600	sepiapterin reductase-like; K00072 sepiapterin reductase [EC:1.1.1.153] (A)	1.59	Up		6.3932e-05	cytoplasm	GO:0000902 cell morphogenesis; GO:0000904 cell morphogenesis involved in differentiation; GO:0001505 regulation of neurotransmitter levels; GO:0006066 alcohol metabolic process; GO:0006082 organic acid metabolic process; GO:0006520 cellular amino acid metabolic process; GO:0006558 L-phenylalanine metabolic process; GO:0006584 catecholamine metabolic process; GO:0006725 cellular aromatic compound …	GO:0005622 intracellular; GO:0005623 cell; GO:0005634 nucleus; GO:0005654 nucleoplasm; GO:0005737 cytoplasm; GO:0005829 cytosol; GO:0031974 membrane-enclosed lumen; GO:0031981 nuclear lumen; GO:0043226 organelle; GO:0043227 membrane-bounded organelle; GO:0043229 intracellular organelle; GO:0043231 intracellular membrane-bounded organelle; GO:0043233 organelle lumen; GO:0044422 organelle part; GO:…	GO:0000166 nucleotide binding; GO:0003824 catalytic activity; GO:0004033 aldo-keto reductase (NADP) activity; GO:0004757 sepiapterin reductase activity; GO:0005488 binding; GO:0005515 protein binding; GO:0016491 oxidoreductase activity; GO:0016614 oxidoreductase activity, acting on CH-OH group of donors; GO:0016616 oxidoreductase activity, acting on the CH-OH group of donors, NAD or NADP as accep…				PF00106	short chain dehydrogenase
F02_transcript_23328	apoeb, apoe, cb82, fa96d02, hm:zeh1311, wu:fa03d06, wu:fa96d02, wu:fa97a11, wu:fc95h12, wu:fj54e06; apolipoprotein Eb; K04524 apolipoprotein E (A)	1.589	Up		8.225e-05	extracellular	GO:0000302 response to reactive oxygen species; GO:0001101 response to acid chemical; GO:0001523 retinoid metabolic process; GO:0001558 regulation of cell growth; GO:0001568 blood vessel development; GO:0001932 regulation of protein phosphorylation; GO:0001933 negative regulation of protein phosphorylation; GO:0001936 regulation of endothelial cell proliferation; GO:0001937 negative regulation of…	GO:0000323 lytic vacuole; GO:0005576 extracellular region; GO:0005615 extracellular space; GO:0005622 intracellular; GO:0005623 cell; GO:0005634 nucleus; GO:0005635 nuclear envelope; GO:0005737 cytoplasm; GO:0005764 lysosome; GO:0005768 endosome; GO:0005769 early endosome; GO:0005770 late endosome; GO:0005773 vacuole; GO:0005783 endoplasmic reticulum; GO:0005788 endoplasmic reticulum lumen; GO:00…	GO:0001540 beta-amyloid binding; GO:0005102 receptor binding; GO:0005198 structural molecule activity; GO:0005215 transporter activity; GO:0005319 lipid transporter activity; GO:0005488 binding; GO:0005496 steroid binding; GO:0005515 protein binding; GO:0005539 glycosaminoglycan binding; GO:0005543 phospholipid binding; GO:0008047 enzyme activator activity; GO:0008092 cytoskeletal protein binding…	K04524	APOE; apolipoprotein E		PF01442	Apolipoprotein A1/A4/E domain
F02_transcript_163	Uncharacterized protein	1.586	Up		0.0083248	nucleus
F02_transcript_29917	hemoglobin subunit alpha-A-like; K13822 hemoglobin subunit alpha (A)	1.585	Up		0.0153992	cytoplasm	GO:0000122 negative regulation of transcription from RNA polymerase II promoter; GO:0001666 response to hypoxia; GO:0002262 myeloid cell homeostasis; GO:0002376 immune system process; GO:0002520 immune system development; GO:0006355 regulation of transcription, DNA-templated; GO:0006357 regulation of transcription from RNA polymerase II promoter; GO:0006810 transport; GO:0006950 response to stres…	GO:0005622 intracellular; GO:0005623 cell; GO:0005737 cytoplasm; GO:0005829 cytosol; GO:0005833 hemoglobin complex; GO:0032991 macromolecular complex; GO:0044424 intracellular part; GO:0044444 cytoplasmic part; GO:0044445 cytosolic part; GO:0044464 cell part;	GO:0005344 oxygen transporter activity;				PF00042	Globin
F02_transcript_29233	putative RNA-directed DNA polymerase from transposon X-element [Stylophora pistillata]	1.572	Up	dre00270 Cysteine and methionine metabolism - Danio rerio (zebrafish); dre00480 Glutathione metabolism - Danio rerio (zebrafish); dre01100 Metabolic pathways - Danio rerio (zebrafish); dre04216 Ferroptosis - Danio rerio (zebrafish);	0.0042557	cytoplasm				K21456	GSS; glutathione synthase [EC:6.3.2.3]	dre00270 Cysteine and methionine metabolism - Danio rerio (zebrafish); dre00480 Glutathione metabolism - Danio rerio (zebrafish); dre01100 Metabolic pathways - Danio rerio (zebrafish); dre04216 Ferroptosis - Danio rerio (zebrafish);
F02_transcript_29975	ba1l, si:bY187G17.4; ba1 globin, like; K13825 hemoglobin subunit epsilon (A)	1.567	Up		0.0142045	cytoplasm	GO:0001666 response to hypoxia; GO:0002376 immune system process; GO:0002520 immune system development; GO:0006810 transport; GO:0006950 response to stress; GO:0007275 multicellular organism development; GO:0009628 response to abiotic stimulus; GO:0015669 gas transport; GO:0015671 oxygen transport; GO:0015893 drug transport; GO:0030097 hemopoiesis; GO:0032501 multicellular organismal process; GO:…	GO:0005622 intracellular; GO:0005623 cell; GO:0005737 cytoplasm; GO:0005829 cytosol; GO:0005833 hemoglobin complex; GO:0032991 macromolecular complex; GO:0044424 intracellular part; GO:0044444 cytoplasmic part; GO:0044445 cytosolic part; GO:0044464 cell part;	GO:0005344 oxygen transporter activity;	K13825	HBE; hemoglobin subunit epsilon		PF00042	Globin
F02_transcript_13179	Transcriptional repressor p66 alpha, partial [Stegodyphus mimosarum]	1.561	Up		0.026544	cytoplasm	GO:0000122 negative regulation of transcription from RNA polymerase II promoter; GO:0001568 blood vessel development; GO:0001701 in utero embryonic development; GO:0001708 cell fate specification; GO:0001838 embryonic epithelial tube formation; GO:0001841 neural tube formation; GO:0001842 neural fold formation; GO:0001843 neural tube closure; GO:0001944 vasculature development; GO:0002009 morphog…	GO:0000118 histone deacetylase complex; GO:0000228 nuclear chromosome; GO:0000785 chromatin; GO:0000790 nuclear chromatin; GO:0005622 intracellular; GO:0005623 cell; GO:0005634 nucleus; GO:0005654 nucleoplasm; GO:0005694 chromosome; GO:0016581 NuRD complex; GO:0017053 transcriptional repressor complex; GO:0031974 membrane-enclosed lumen; GO:0031981 nuclear lumen; GO:0032991 macromolecular complex…	GO:0000981 RNA polymerase II transcription factor activity, sequence-specific DNA binding; GO:0003700 transcription factor activity, sequence-specific DNA binding; GO:0005488 binding; GO:0005515 protein binding; GO:0030674 protein binding, bridging; GO:0060090 binding, bridging;	K23194			PF00320	GATA zinc finger
F02_transcript_25255	poly(U)-specific endoribonuclease-B-like [Stylophora pistillata]	1.56	Up		0.0098167	cytoplasm,nucleus	GO:0006139 nucleobase-containing compound metabolic process; GO:0006417 regulation of translation; GO:0006725 cellular aromatic compound metabolic process; GO:0006807 nitrogen compound metabolic process; GO:0007610 behavior; GO:0007626 locomotory behavior; GO:0008152 metabolic process; GO:0008344 adult locomotory behavior; GO:0009889 regulation of biosynthetic process; GO:0009987 cellular process…		GO:0003676 nucleic acid binding; GO:0003723 RNA binding; GO:0003824 catalytic activity; GO:0004518 nuclease activity; GO:0004519 endonuclease activity; GO:0004521 endoribonuclease activity; GO:0004540 ribonuclease activity; GO:0005488 binding; GO:0016787 hydrolase activity; GO:0016788 hydrolase activity, acting on ester bonds; GO:0097159 organic cyclic compound binding; GO:1901363 heterocyclic co…	K14648	ENDOU, PP11; poly(U)-specific endoribonuclease [EC:3.1.-.-]
F02_transcript_24479	hexokinase-2-like; K00844 hexokinase [EC:2.7.1.1] (A)	1.56	Up	dre00010 Glycolysis / Gluconeogenesis - Danio rerio (zebrafish); dre00051 Fructose and mannose metabolism - Danio rerio (zebrafish); dre00052 Galactose metabolism - Danio rerio (zebrafish); dre00500 Starch and sucrose metabolism - Danio rerio (zebrafish); dre00520 Amino sugar and nucleotide sugar metabolism - Danio rerio (zebrafish); dre00524 Neomycin, kanamycin and gentamicin biosynthesis - Dani…	0.0079374	cytoplasm,nucleus	GO:0001678 cellular glucose homeostasis; GO:0005975 carbohydrate metabolic process; GO:0006082 organic acid metabolic process; GO:0006090 pyruvate metabolic process; GO:0006091 generation of precursor metabolites and energy; GO:0006096 glycolytic process; GO:0006139 nucleobase-containing compound metabolic process; GO:0006163 purine nucleotide metabolic process; GO:0006164 purine nucleotide biosy…	GO:0005622 intracellular; GO:0005623 cell; GO:0005737 cytoplasm; GO:0005829 cytosol; GO:0044424 intracellular part; GO:0044444 cytoplasmic part; GO:0044464 cell part;	GO:0003824 catalytic activity; GO:0004340 glucokinase activity; GO:0004396 hexokinase activity; GO:0005488 binding; GO:0005515 protein binding; GO:0008865 fructokinase activity; GO:0016301 kinase activity; GO:0016740 transferase activity; GO:0016772 transferase activity, transferring phosphorus-containing groups; GO:0016773 phosphotransferase activity, alcohol group as acceptor; GO:0019158 mannok…	K00844	HK; hexokinase [EC:2.7.1.1]	dre00010 Glycolysis / Gluconeogenesis - Danio rerio (zebrafish); dre00051 Fructose and mannose metabolism - Danio rerio (zebrafish); dre00052 Galactose metabolism - Danio rerio (zebrafish); dre00500 Starch and sucrose metabolism - Danio rerio (zebrafish); dre00520 Amino sugar and nucleotide sugar metabolism - Danio rerio (zebrafish); dre00524 Neomycin, kanamycin and gentamicin biosynthesis - Dani…	PF00349; PF03727	Hexokinase; Hexokinase
F02_transcript_6245	fkbp5, si:zc263a23.8, wu:fc31g11, wu:fl87b03, zgc:64082; FK506 binding protein 5 (EC:5.2.1.8); K09571 FK506-binding protein 4/5 [EC:5.2.1.8] (A)	1.557	Up		0.00023681	cytoplasm	GO:0000413 protein peptidyl-prolyl isomerization; GO:0003008 system process; GO:0006457 protein folding; GO:0006464 cellular protein modification process; GO:0006807 nitrogen compound metabolic process; GO:0007275 multicellular organism development; GO:0007399 nervous system development; GO:0007422 peripheral nervous system development; GO:0007600 sensory perception; GO:0007601 visual perception;…	GO:0005622 intracellular; GO:0005623 cell; GO:0005634 nucleus; GO:0005654 nucleoplasm; GO:0005737 cytoplasm; GO:0005829 cytosol; GO:0005886 plasma membrane; GO:0016020 membrane; GO:0016027 inaD signaling complex; GO:0016028 rhabdomere; GO:0019897 extrinsic component of plasma membrane; GO:0019898 extrinsic component of membrane; GO:0031974 membrane-enclosed lumen; GO:0031981 nuclear lumen; GO:003…	GO:0003755 peptidyl-prolyl cis-trans isomerase activity; GO:0003824 catalytic activity; GO:0005488 binding; GO:0005515 protein binding; GO:0005527 macrolide binding; GO:0005528 FK506 binding; GO:0008144 drug binding; GO:0016853 isomerase activity; GO:0016859 cis-trans isomerase activity; GO:0031072 heat shock protein binding; GO:0051879 Hsp90 protein binding; GO:0097159 organic cyclic compound bi…	K09571	FKBP4_5; FK506-binding protein 4/5 [EC:5.2.1.8]		PF00254	FKBP-type peptidyl-prolyl cis-trans isomerase
F02_transcript_20881	zgc:158870; K06752 major histocompatibility complex, class II (A)	1.551	Up	dre04145 Phagosome - Danio rerio (zebrafish); dre04514 Cell adhesion molecules (CAMs) - Danio rerio (zebrafish); dre04672 Intestinal immune network for IgA production - Danio rerio (zebrafish); dre05168 Herpes simplex virus 1 infection - Danio rerio (zebrafish);	0.00189522	extracellular	GO:0001817 regulation of cytokine production; GO:0001819 positive regulation of cytokine production; GO:0002253 activation of immune response; GO:0002376 immune system process; GO:0002429 immune response-activating cell surface receptor signaling pathway; GO:0002478 antigen processing and presentation of exogenous peptide antigen; GO:0002495 antigen processing and presentation of peptide antigen …	GO:0000139 Golgi membrane; GO:0000323 lytic vacuole; GO:0005622 intracellular; GO:0005623 cell; GO:0005737 cytoplasm; GO:0005764 lysosome; GO:0005765 lysosomal membrane; GO:0005768 endosome; GO:0005773 vacuole; GO:0005774 vacuolar membrane; GO:0005783 endoplasmic reticulum; GO:0005789 endoplasmic reticulum membrane; GO:0005794 Golgi apparatus; GO:0005798 Golgi-associated vesicle; GO:0005802 trans…	GO:0003823 antigen binding; GO:0005488 binding; GO:0033218 amide binding; GO:0042277 peptide binding; GO:0042605 peptide antigen binding;	K06752	MHC2; major histocompatibility complex, class II	dre04145 Phagosome - Danio rerio (zebrafish); dre04514 Cell adhesion molecules (CAMs) - Danio rerio (zebrafish); dre04672 Intestinal immune network for IgA production - Danio rerio (zebrafish); dre05168 Herpes simplex virus 1 infection - Danio rerio (zebrafish);	PF00969; PF07654	Class II histocompatibility antigen, beta domain; Immunoglobulin C1-set domain
F02_transcript_25465	zgc:153855; si:dkey-180p18.9; K00011 aldehyde reductase [EC:1.1.1.21] (A)	1.548	Up	dre00040 Pentose and glucuronate interconversions - Danio rerio (zebrafish); dre00051 Fructose and mannose metabolism - Danio rerio (zebrafish); dre00052 Galactose metabolism - Danio rerio (zebrafish); dre00561 Glycerolipid metabolism - Danio rerio (zebrafish); dre00790 Folate biosynthesis - Danio rerio (zebrafish); dre01100 Metabolic pathways - Danio rerio (zebrafish);	5.7145e-05	cytoplasm				K00011	AKR1B; aldehyde reductase [EC:1.1.1.21]	dre00040 Pentose and glucuronate interconversions - Danio rerio (zebrafish); dre00051 Fructose and mannose metabolism - Danio rerio (zebrafish); dre00052 Galactose metabolism - Danio rerio (zebrafish); dre00561 Glycerolipid metabolism - Danio rerio (zebrafish); dre00790 Folate biosynthesis - Danio rerio (zebrafish); dre01100 Metabolic pathways - Danio rerio (zebrafish);	PF00248	Aldo/keto reductase family
F02_transcript_17860	interferon-induced GTP-binding protein Mx1 [Bos taurus]	1.547	Up		0.0066786	cytoplasm	GO:0000266 mitochondrial fission; GO:0002252 immune effector process; GO:0002376 immune system process; GO:0003373 dynamin family protein polymerization involved in membrane fission; GO:0003374 dynamin family protein polymerization involved in mitochondrial fission; GO:0006950 response to stress; GO:0006952 defense response; GO:0006955 immune response; GO:0006996 organelle organization; GO:000700…	GO:0005622 intracellular; GO:0005623 cell; GO:0005737 cytoplasm; GO:0005739 mitochondrion; GO:0005740 mitochondrial envelope; GO:0016020 membrane; GO:0031090 organelle membrane; GO:0031966 mitochondrial membrane; GO:0031967 organelle envelope; GO:0031975 envelope; GO:0043226 organelle; GO:0043227 membrane-bounded organelle; GO:0043229 intracellular organelle; GO:0043231 intracellular membrane-bou…	GO:0003824 catalytic activity; GO:0003924 GTPase activity; GO:0005488 binding; GO:0005515 protein binding; GO:0008017 microtubule binding; GO:0008092 cytoskeletal protein binding; GO:0015631 tubulin binding; GO:0016462 pyrophosphatase activity; GO:0016787 hydrolase activity; GO:0016817 hydrolase activity, acting on acid anhydrides; GO:0016818 hydrolase activity, acting on acid anhydrides, in phos…				PF00350	Dynamin family
F02_transcript_6673	MORC family CW-type zinc finger protein 3-like [Stylophora pistillata]	1.546	Up		0.0064619	cytoplasm							PF13589; PF07496	Histidine kinase-, DNA gyrase B-, and HSP90-like ATPase; CW-type Zinc Finger
F02_transcript_5961	cdh1, E-cadherin; cadherin 1, type 1, E-cadherin (epithelial); K05689 cadherin 1, type 1, E-cadherin (A)	1.541	Up	dre04371 Apelin signaling pathway - Danio rerio (zebrafish); dre04514 Cell adhesion molecules (CAMs) - Danio rerio (zebrafish); dre04520 Adherens junction - Danio rerio (zebrafish);	0.049104	peroxisome	GO:0000003 reproduction; GO:0000902 cell morphogenesis; GO:0000904 cell morphogenesis involved in differentiation; GO:0001101 response to acid chemical; GO:0001701 in utero embryonic development; GO:0001817 regulation of cytokine production; GO:0001818 negative regulation of cytokine production; GO:0001824 blastocyst development; GO:0001825 blastocyst formation; GO:0001829 trophectodermal cell di…	GO:0005576 extracellular region; GO:0005622 intracellular; GO:0005623 cell; GO:0005737 cytoplasm; GO:0005768 endosome; GO:0005794 Golgi apparatus; GO:0005802 trans-Golgi network; GO:0005856 cytoskeleton; GO:0005886 plasma membrane; GO:0005901 caveola; GO:0005911 cell-cell junction; GO:0005912 adherens junction; GO:0005913 cell-cell adherens junction; GO:0009898 cytoplasmic side of plasma membrane…	GO:0005488 binding; GO:0005509 calcium ion binding; GO:0005515 protein binding; GO:0008013 beta-catenin binding; GO:0008092 cytoskeletal protein binding; GO:0019899 enzyme binding; GO:0019902 phosphatase binding; GO:0019903 protein phosphatase binding; GO:0019904 protein domain specific binding; GO:0030506 ankyrin binding; GO:0032794 GTPase activating protein binding; GO:0042802 identical protein…	K05689	CDH1, CDHE, CD324; cadherin 1, type 1, E-cadherin	dre04371 Apelin signaling pathway - Danio rerio (zebrafish); dre04514 Cell adhesion molecules (CAMs) - Danio rerio (zebrafish); dre04520 Adherens junction - Danio rerio (zebrafish);	PF08758; PF00028	Cadherin prodomain like; Cadherin domain
F02_transcript_8471	galectin-4 [Homo sapiens]	1.541	Up		2.0658e-05	cytoplasm	GO:0007155 cell adhesion; GO:0022610 biological adhesion;	GO:0005576 extracellular region; GO:0005615 extracellular space; GO:0005622 intracellular; GO:0005623 cell; GO:0005737 cytoplasm; GO:0005829 cytosol; GO:0005886 plasma membrane; GO:0016020 membrane; GO:0044421 extracellular region part; GO:0044424 intracellular part; GO:0044444 cytoplasmic part; GO:0044464 cell part; GO:0071944 cell periphery;	GO:0005488 binding; GO:0016936 galactoside binding; GO:0030246 carbohydrate binding; GO:0097367 carbohydrate derivative binding;				PF00337	Galactoside-binding lectin
F02_transcript_28882	Receptor-type tyrosine-protein phosphatase F [Stylophora pistillata]	1.539	Up		0.00139826	extracellular							PF00754	F5/8 type C domain
F02_transcript_8054	GPI-anchor transamidase-like; K05290 phosphatidylinositol glycan, class K [EC:2.6.-.-] (A)	1.528	Up	dre00563 Glycosylphosphatidylinositol (GPI)-anchor biosynthesis - Danio rerio (zebrafish); dre01100 Metabolic pathways - Danio rerio (zebrafish);	0.038562	plasma membrane	GO:0006464 cellular protein modification process; GO:0006497 protein lipidation; GO:0006505 GPI anchor metabolic process; GO:0006506 GPI anchor biosynthetic process; GO:0006629 lipid metabolic process; GO:0006643 membrane lipid metabolic process; GO:0006644 phospholipid metabolic process; GO:0006650 glycerophospholipid metabolic process; GO:0006661 phosphatidylinositol biosynthetic process; GO:00…	GO:0005622 intracellular; GO:0005623 cell; GO:0005737 cytoplasm; GO:0005783 endoplasmic reticulum; GO:0005789 endoplasmic reticulum membrane; GO:0012505 endomembrane system; GO:0016020 membrane; GO:0016021 integral component of membrane; GO:0030176 integral component of endoplasmic reticulum membrane; GO:0031224 intrinsic component of membrane; GO:0031227 intrinsic component of endoplasmic reticu…	GO:0003756 protein disulfide isomerase activity; GO:0003824 catalytic activity; GO:0003923 GPI-anchor transamidase activity; GO:0016787 hydrolase activity; GO:0016853 isomerase activity; GO:0016860 intramolecular oxidoreductase activity; GO:0016864 intramolecular oxidoreductase activity, transposing S-S bonds;	K05290	PIGK; phosphatidylinositol glycan, class K [EC:2.6.-.-]	dre00563 Glycosylphosphatidylinositol (GPI)-anchor biosynthesis - Danio rerio (zebrafish); dre01100 Metabolic pathways - Danio rerio (zebrafish);
F02_transcript_10397	cars, sb:cb71; cysteinyl-tRNA synthetase (EC:6.1.1.16); K01883 cysteinyl-tRNA synthetase [EC:6.1.1.16] (A)	1.527	Up	dre00970 Aminoacyl-tRNA biosynthesis - Danio rerio (zebrafish);	0.0195632	cytoplasm	GO:0006082 organic acid metabolic process; GO:0006139 nucleobase-containing compound metabolic process; GO:0006399 tRNA metabolic process; GO:0006412 translation; GO:0006418 tRNA aminoacylation for protein translation; GO:0006423 cysteinyl-tRNA aminoacylation; GO:0006518 peptide metabolic process; GO:0006520 cellular amino acid metabolic process; GO:0006725 cellular aromatic compound metabolic pr…	GO:0005622 intracellular; GO:0005623 cell; GO:0005737 cytoplasm; GO:0005829 cytosol; GO:0044424 intracellular part; GO:0044444 cytoplasmic part; GO:0044464 cell part;	GO:0000049 tRNA binding; GO:0000166 nucleotide binding; GO:0003676 nucleic acid binding; GO:0003723 RNA binding; GO:0003824 catalytic activity; GO:0004812 aminoacyl-tRNA ligase activity; GO:0004817 cysteine-tRNA ligase activity; GO:0005488 binding; GO:0005515 protein binding; GO:0005524 ATP binding; GO:0008144 drug binding; GO:0016874 ligase activity; GO:0016875 ligase activity, forming carbon-ox…	K01883	CARS, cysS; cysteinyl-tRNA synthetase [EC:6.1.1.16]	dre00970 Aminoacyl-tRNA biosynthesis - Danio rerio (zebrafish);
F02_transcript_11482	guanylate kinase-like; K00942 guanylate kinase [EC:2.7.4.8] (A)	1.525	Up	dre00230 Purine metabolism - Danio rerio (zebrafish); dre01100 Metabolic pathways - Danio rerio (zebrafish);	0.040739	cytoplasm	GO:0006139 nucleobase-containing compound metabolic process; GO:0006163 purine nucleotide metabolic process; GO:0006164 purine nucleotide biosynthetic process; GO:0006185 dGDP biosynthetic process; GO:0006725 cellular aromatic compound metabolic process; GO:0006753 nucleoside phosphate metabolic process; GO:0006793 phosphorus metabolic process; GO:0006796 phosphate-containing compound metabolic p…	GO:0005622 intracellular; GO:0005623 cell; GO:0005737 cytoplasm; GO:0005829 cytosol; GO:0044424 intracellular part; GO:0044444 cytoplasmic part; GO:0044464 cell part;	GO:0003824 catalytic activity; GO:0004385 guanylate kinase activity; GO:0016301 kinase activity; GO:0016740 transferase activity; GO:0016772 transferase activity, transferring phosphorus-containing groups; GO:0016776 phosphotransferase activity, phosphate group as acceptor; GO:0019205 nucleobase-containing compound kinase activity; GO:0050145 nucleoside phosphate kinase activity;	K00942	E2.7.4.8, gmk; guanylate kinase [EC:2.7.4.8]	dre00230 Purine metabolism - Danio rerio (zebrafish); dre01100 Metabolic pathways - Danio rerio (zebrafish);	PF00625	Guanylate kinase
F02_transcript_29783	galectin-1 [Sus scrofa]	1.525	Up		0.000116788	cytoplasm							PF00337	Galactoside-binding lectin
F02_transcript_7182	Uncharacterized protein	1.524	Up		0.0023192	cytoplasm,nucleus
F02_transcript_21010	metalloproteinase inhibitor 2 precursor [Mus musculus]	1.523	Up		0.00161696	extracellular	GO:0000003 reproduction; GO:0001775 cell activation; GO:0001932 regulation of protein phosphorylation; GO:0001934 positive regulation of protein phosphorylation; GO:0002252 immune effector process; GO:0002263 cell activation involved in immune response; GO:0002274 myeloid leukocyte activation; GO:0002275 myeloid cell activation involved in immune response; GO:0002283 neutrophil activation involve…	GO:0005576 extracellular region; GO:0005604 basement membrane; GO:0005615 extracellular space; GO:0005622 intracellular; GO:0005623 cell; GO:0005737 cytoplasm; GO:0009986 cell surface; GO:0012505 endomembrane system; GO:0030141 secretory granule; GO:0030424 axon; GO:0030426 growth cone; GO:0030427 site of polarized growth; GO:0031012 extracellular matrix; GO:0031410 cytoplasmic vesicle; GO:003197…	GO:0002020 protease binding; GO:0004857 enzyme inhibitor activity; GO:0004866 endopeptidase inhibitor activity; GO:0005102 receptor binding; GO:0005178 integrin binding; GO:0005488 binding; GO:0005515 protein binding; GO:0008047 enzyme activator activity; GO:0008191 metalloendopeptidase inhibitor activity; GO:0008270 zinc ion binding; GO:0019899 enzyme binding; GO:0030234 enzyme regulator activit…	K22583			PF00965	Tissue inhibitor of metalloproteinase
F02_transcript_1011	H(+)/Cl(-) exchange transporter 3-like; K05012 chloride channel 3/4/5 (A)	1.52	Up		0.00088087	plasma membrane	GO:0001894 tissue homeostasis; GO:0001895 retina homeostasis; GO:0006810 transport; GO:0006811 ion transport; GO:0006812 cation transport; GO:0006820 anion transport; GO:0006821 chloride transport; GO:0006873 cellular ion homeostasis; GO:0006884 cell volume homeostasis; GO:0006885 regulation of pH; GO:0006897 endocytosis; GO:0006909 phagocytosis; GO:0006911 phagocytosis, engulfment; GO:0006996 or…	GO:0005622 intracellular; GO:0005623 cell; GO:0005737 cytoplasm; GO:0005768 endosome; GO:0005769 early endosome; GO:0005770 late endosome; GO:0005794 Golgi apparatus; GO:0005886 plasma membrane; GO:0005887 integral component of plasma membrane; GO:0008021 synaptic vesicle; GO:0009897 external side of plasma membrane; GO:0009986 cell surface; GO:0010008 endosome membrane; GO:0012505 endomembrane s…	GO:0005215 transporter activity; GO:0005216 ion channel activity; GO:0005225 volume-sensitive anion channel activity; GO:0005244 voltage-gated ion channel activity; GO:0005247 voltage-gated chloride channel activity; GO:0005253 anion channel activity; GO:0005254 chloride channel activity; GO:0005488 binding; GO:0005515 protein binding; GO:0008308 voltage-gated anion channel activity; GO:0008509 a…	K05012	CLCN3_4_5; chloride channel 3/4/5
F02_transcript_14259	pdia4, cai, wu:fd20c07, zgc:113965, zgc:136625, zgc:56014, zgc:77773; protein disulfide isomerase family A, member 4 (EC:5.3.4.1); K09582 protein disulfide-isomerase A4 [EC:5.3.4.1] (A)	1.519	Up	dre04141 Protein processing in endoplasmic reticulum - Danio rerio (zebrafish);	0.0036173	extracellular	GO:0002790 peptide secretion; GO:0006457 protein folding; GO:0006810 transport; GO:0006950 response to stress; GO:0008104 protein localization; GO:0008152 metabolic process; GO:0009306 protein secretion; GO:0009987 cellular process; GO:0015031 protein transport; GO:0015833 peptide transport; GO:0032940 secretion by cell; GO:0033036 macromolecule localization; GO:0033554 cellular response to stres…	GO:0005576 extracellular region; GO:0005615 extracellular space; GO:0005622 intracellular; GO:0005623 cell; GO:0005737 cytoplasm; GO:0005783 endoplasmic reticulum; GO:0005788 endoplasmic reticulum lumen; GO:0005790 smooth endoplasmic reticulum; GO:0009986 cell surface; GO:0012505 endomembrane system; GO:0031974 membrane-enclosed lumen; GO:0032991 macromolecular complex; GO:0034663 endoplasmic ret…	GO:0003756 protein disulfide isomerase activity; GO:0003824 catalytic activity; GO:0015036 disulfide oxidoreductase activity; GO:0015037 peptide disulfide oxidoreductase activity; GO:0016491 oxidoreductase activity; GO:0016667 oxidoreductase activity, acting on a sulfur group of donors; GO:0016853 isomerase activity; GO:0016860 intramolecular oxidoreductase activity; GO:0016864 intramolecular oxi…	K09582	PDIA4, ERP72; protein disulfide-isomerase A4 [EC:5.3.4.1]	dre04141 Protein processing in endoplasmic reticulum - Danio rerio (zebrafish);	PF00085; PF13848	Thioredoxin; Thioredoxin-like domain
F02_transcript_14908	acid ceramidase-like; K12348 acid ceramidase [EC:3.5.1.23] (A)	1.515	Up	dre00600 Sphingolipid metabolism - Danio rerio (zebrafish); dre01100 Metabolic pathways - Danio rerio (zebrafish); dre04142 Lysosome - Danio rerio (zebrafish);	0.0043448	extracellular	GO:0001775 cell activation; GO:0002252 immune effector process; GO:0002263 cell activation involved in immune response; GO:0002274 myeloid leukocyte activation; GO:0002275 myeloid cell activation involved in immune response; GO:0002283 neutrophil activation involved in immune response; GO:0002366 leukocyte activation involved in immune response; GO:0002376 immune system process; GO:0002443 leukoc…	GO:0000323 lytic vacuole; GO:0005576 extracellular region; GO:0005615 extracellular space; GO:0005622 intracellular; GO:0005623 cell; GO:0005737 cytoplasm; GO:0005764 lysosome; GO:0005773 vacuole; GO:0005775 vacuolar lumen; GO:0012505 endomembrane system; GO:0030141 secretory granule; GO:0031410 cytoplasmic vesicle; GO:0031974 membrane-enclosed lumen; GO:0031982 vesicle; GO:0043202 lysosomal lume…	GO:0003824 catalytic activity; GO:0016787 hydrolase activity; GO:0016810 hydrolase activity, acting on carbon-nitrogen (but not peptide) bonds; GO:0016811 hydrolase activity, acting on carbon-nitrogen (but not peptide) bonds, in linear amides; GO:0017040 ceramidase activity;	K12348	ASAH1; acid ceramidase [EC:3.5.1.23]	dre00600 Sphingolipid metabolism - Danio rerio (zebrafish); dre01100 Metabolic pathways - Danio rerio (zebrafish); dre04142 Lysosome - Danio rerio (zebrafish);	PF02275	Linear amide C-N hydrolases, choloylglycine hydrolase family
F02_transcript_15548	tescb, zgc:77891; tescalcin b; K17612 calcineurin B homologous protein 3 (A)	1.498	Up		0.00126381	cytoplasm	GO:0000003 reproduction; GO:0001101 response to acid chemical; GO:0002028 regulation of sodium ion transport; GO:0002376 immune system process; GO:0002520 immune system development; GO:0002682 regulation of immune system process; GO:0002684 positive regulation of immune system process; GO:0002761 regulation of myeloid leukocyte differentiation; GO:0002763 positive regulation of myeloid leukocyte …	GO:0001726 ruffle; GO:0005622 intracellular; GO:0005623 cell; GO:0005634 nucleus; GO:0005737 cytoplasm; GO:0005829 cytosol; GO:0005886 plasma membrane; GO:0016020 membrane; GO:0030027 lamellipodium; GO:0031252 cell leading edge; GO:0042995 cell projection; GO:0043226 organelle; GO:0043227 membrane-bounded organelle; GO:0043229 intracellular organelle; GO:0043231 intracellular membrane-bounded org…	GO:0000287 magnesium ion binding; GO:0004857 enzyme inhibitor activity; GO:0005488 binding; GO:0005509 calcium ion binding; GO:0005515 protein binding; GO:0019208 phosphatase regulator activity; GO:0019212 phosphatase inhibitor activity; GO:0030234 enzyme regulator activity; GO:0042802 identical protein binding; GO:0042803 protein homodimerization activity; GO:0043167 ion binding; GO:0043169 cati…	K17612	TESC, CHP3; calcineurin B homologous protein 3
F02_transcript_21919	putative chaperone protein DnaK [Fasciola hepatica]	1.493	Up	dre03040 Spliceosome - Danio rerio (zebrafish); dre04010 MAPK signaling pathway - Danio rerio (zebrafish); dre04141 Protein processing in endoplasmic reticulum - Danio rerio (zebrafish); dre04144 Endocytosis - Danio rerio (zebrafish);	0.0045407	mitochondria	GO:0006810 transport; GO:0006950 response to stress; GO:0007275 multicellular organism development; GO:0007568 aging; GO:0008340 determination of adult lifespan; GO:0009266 response to temperature stimulus; GO:0009408 response to heat; GO:0009628 response to abiotic stimulus; GO:0010259 multicellular organism aging; GO:0016192 vesicle-mediated transport; GO:0016197 endosomal transport; GO:0016482…	GO:0005622 intracellular; GO:0005623 cell; GO:0005634 nucleus; GO:0005737 cytoplasm; GO:0005829 cytosol; GO:0043226 organelle; GO:0043227 membrane-bounded organelle; GO:0043229 intracellular organelle; GO:0043231 intracellular membrane-bounded organelle; GO:0044424 intracellular part; GO:0044444 cytoplasmic part; GO:0044464 cell part;	GO:0003824 catalytic activity; GO:0005488 binding; GO:0005515 protein binding; GO:0016462 pyrophosphatase activity; GO:0016787 hydrolase activity; GO:0016817 hydrolase activity, acting on acid anhydrides; GO:0016818 hydrolase activity, acting on acid anhydrides, in phosphorus-containing anhydrides; GO:0016887 ATPase activity; GO:0017111 nucleoside-triphosphatase activity;	K03283	HSPA1s; heat shock 70kDa protein 1/2/6/8	dre03040 Spliceosome - Danio rerio (zebrafish); dre04010 MAPK signaling pathway - Danio rerio (zebrafish); dre04141 Protein processing in endoplasmic reticulum - Danio rerio (zebrafish); dre04144 Endocytosis - Danio rerio (zebrafish);
F02_transcript_29672	galectin-1 [Sus scrofa]	1.493	Up		0.0034036	cytoplasm							PF00337	Galactoside-binding lectin
F02_transcript_23288	cmpk2, si:ch211-276e8.3; cytidine monophosphate (UMP-CMP) kinase 2, mitochondrial; K13809 UMP-CMP kinase 2, mitochondrial [EC:2.7.4.14] (A)	1.487	Up	dre00240 Pyrimidine metabolism - Danio rerio (zebrafish); dre01100 Metabolic pathways - Danio rerio (zebrafish);	0.0022022	mitochondria	GO:0002237 response to molecule of bacterial origin; GO:0006139 nucleobase-containing compound metabolic process; GO:0006165 nucleoside diphosphate phosphorylation; GO:0006220 pyrimidine nucleotide metabolic process; GO:0006221 pyrimidine nucleotide biosynthetic process; GO:0006227 dUDP biosynthetic process; GO:0006233 dTDP biosynthetic process; GO:0006235 dTTP biosynthetic process; GO:0006725 ce…	GO:0005622 intracellular; GO:0005623 cell; GO:0005737 cytoplasm; GO:0005739 mitochondrion; GO:0043226 organelle; GO:0043227 membrane-bounded organelle; GO:0043229 intracellular organelle; GO:0043231 intracellular membrane-bounded organelle; GO:0044424 intracellular part; GO:0044444 cytoplasmic part; GO:0044464 cell part;	GO:0003824 catalytic activity; GO:0004127 cytidylate kinase activity; GO:0004550 nucleoside diphosphate kinase activity; GO:0004798 thymidylate kinase activity; GO:0009041 uridylate kinase activity; GO:0016301 kinase activity; GO:0016740 transferase activity; GO:0016772 transferase activity, transferring phosphorus-containing groups; GO:0016776 phosphotransferase activity, phosphate group as acce…	K13809	CMPK2; UMP-CMP kinase 2, mitochondrial [EC:2.7.4.14]	dre00240 Pyrimidine metabolism - Danio rerio (zebrafish); dre01100 Metabolic pathways - Danio rerio (zebrafish);
F02_transcript_20242	bpgm, zgc:92230; 2,3-bisphosphoglycerate mutase; K01837 bisphosphoglycerate mutase [EC:5.4.2.4 5.4.2.11 3.1.3.13] (A)	1.486	Up	dre00010 Glycolysis / Gluconeogenesis - Danio rerio (zebrafish); dre00260 Glycine, serine and threonine metabolism - Danio rerio (zebrafish); dre01100 Metabolic pathways - Danio rerio (zebrafish);	0.00126162	cytoplasm	GO:0002262 myeloid cell homeostasis; GO:0002376 immune system process; GO:0002520 immune system development; GO:0005975 carbohydrate metabolic process; GO:0005996 monosaccharide metabolic process; GO:0006006 glucose metabolic process; GO:0006007 glucose catabolic process; GO:0006082 organic acid metabolic process; GO:0006090 pyruvate metabolic process; GO:0006091 generation of precursor metabolit…	GO:0005622 intracellular; GO:0005623 cell; GO:0005737 cytoplasm; GO:0005829 cytosol; GO:0044424 intracellular part; GO:0044444 cytoplasmic part; GO:0044464 cell part;	GO:0003824 catalytic activity; GO:0004082 bisphosphoglycerate mutase activity; GO:0004619 phosphoglycerate mutase activity; GO:0016853 isomerase activity; GO:0016866 intramolecular transferase activity; GO:0016868 intramolecular transferase activity, phosphotransferases; GO:0046538 2,3-bisphosphoglycerate-dependent phosphoglycerate mutase activity;	K01837	BPGM; bisphosphoglycerate/phosphoglycerate mutase [EC:5.4.2.4 5.4.2.11]	dre00010 Glycolysis / Gluconeogenesis - Danio rerio (zebrafish); dre00260 Glycine, serine and threonine metabolism - Danio rerio (zebrafish); dre01100 Metabolic pathways - Danio rerio (zebrafish);	PF00300	Histidine phosphatase superfamily (branch 1)
F02_transcript_9561	interferon regulatory factor 3-like; K05411 interferon regulatory factor 3 (A)	1.484	Up	dre04620 Toll-like receptor signaling pathway - Danio rerio (zebrafish); dre04621 NOD-like receptor signaling pathway - Danio rerio (zebrafish); dre04622 RIG-I-like receptor signaling pathway - Danio rerio (zebrafish); dre04623 Cytosolic DNA-sensing pathway - Danio rerio (zebrafish); dre05168 Herpes simplex virus 1 infection - Danio rerio (zebrafish);	0.038116	cytoplasm	GO:0000122 negative regulation of transcription from RNA polymerase II promoter; GO:0001816 cytokine production; GO:0001817 regulation of cytokine production; GO:0001818 negative regulation of cytokine production; GO:0001819 positive regulation of cytokine production; GO:0001959 regulation of cytokine-mediated signaling pathway; GO:0001961 positive regulation of cytokine-mediated signaling pathwa…	GO:0005622 intracellular; GO:0005623 cell; GO:0005634 nucleus; GO:0005737 cytoplasm; GO:0005829 cytosol; GO:0043226 organelle; GO:0043227 membrane-bounded organelle; GO:0043229 intracellular organelle; GO:0043231 intracellular membrane-bounded organelle; GO:0044424 intracellular part; GO:0044444 cytoplasmic part; GO:0044464 cell part;	GO:0000976 transcription regulatory region sequence-specific DNA binding; GO:0000977 RNA polymerase II regulatory region sequence-specific DNA binding; GO:0000978 RNA polymerase II core promoter proximal region sequence-specific DNA binding; GO:0000981 RNA polymerase II transcription factor activity, sequence-specific DNA binding; GO:0000982 transcription factor activity, RNA polymerase II core p…	K05411	IRF3; interferon regulatory factor 3	dre04620 Toll-like receptor signaling pathway - Danio rerio (zebrafish); dre04621 NOD-like receptor signaling pathway - Danio rerio (zebrafish); dre04622 RIG-I-like receptor signaling pathway - Danio rerio (zebrafish); dre04623 Cytosolic DNA-sensing pathway - Danio rerio (zebrafish); dre05168 Herpes simplex virus 1 infection - Danio rerio (zebrafish);	PF00605	Interferon regulatory factor transcription factor
F02_transcript_17669	HPGD; hydroxyprostaglandin dehydrogenase 15-(NAD); K00069 15-hydroxyprostaglandin dehydrogenase (NAD) [EC:1.1.1.141] (A)	1.472	Up		5.987e-05	cytoplasm	GO:0000003 reproduction; GO:0001568 blood vessel development; GO:0001655 urogenital system development; GO:0001676 long-chain fatty acid metabolic process; GO:0001822 kidney development; GO:0001944 vasculature development; GO:0002237 response to molecule of bacterial origin; GO:0006082 organic acid metabolic process; GO:0006629 lipid metabolic process; GO:0006631 fatty acid metabolic process; GO:…	GO:0005576 extracellular region; GO:0005615 extracellular space; GO:0005622 intracellular; GO:0005623 cell; GO:0005634 nucleus; GO:0005654 nucleoplasm; GO:0005737 cytoplasm; GO:0005829 cytosol; GO:0031974 membrane-enclosed lumen; GO:0031981 nuclear lumen; GO:0043226 organelle; GO:0043227 membrane-bounded organelle; GO:0043229 intracellular organelle; GO:0043231 intracellular membrane-bounded orga…	GO:0000166 nucleotide binding; GO:0003824 catalytic activity; GO:0004888 transmembrane signaling receptor activity; GO:0004930 G-protein coupled receptor activity; GO:0004953 icosanoid receptor activity; GO:0004954 prostanoid receptor activity; GO:0004955 prostaglandin receptor activity; GO:0004957 prostaglandin E receptor activity; GO:0005488 binding; GO:0005515 protein binding; GO:0016404 15-hy…	K00069	HPGD; 15-hydroxyprostaglandin dehydrogenase (NAD) [EC:1.1.1.141]		PF00106	short chain dehydrogenase
F02_transcript_22090	cytosolic non-specific dipeptidase-like; K08660 cytosolic nonspecific dipeptidase [EC:3.4.13.18] (A)	1.472	Up	dre00330 Arginine and proline metabolism - Danio rerio (zebrafish); dre00340 Histidine metabolism - Danio rerio (zebrafish); dre00410 beta-Alanine metabolism - Danio rerio (zebrafish); dre01100 Metabolic pathways - Danio rerio (zebrafish);	0.00167697	cytoplasm	GO:0006508 proteolysis; GO:0006518 peptide metabolic process; GO:0006575 cellular modified amino acid metabolic process; GO:0006749 glutathione metabolic process; GO:0006750 glutathione biosynthetic process; GO:0006790 sulfur compound metabolic process; GO:0006807 nitrogen compound metabolic process; GO:0008152 metabolic process; GO:0009058 biosynthetic process; GO:0009987 cellular process; GO:00…	GO:0005622 intracellular; GO:0005623 cell; GO:0005634 nucleus; GO:0005654 nucleoplasm; GO:0005737 cytoplasm; GO:0005829 cytosol; GO:0031974 membrane-enclosed lumen; GO:0031981 nuclear lumen; GO:0043226 organelle; GO:0043227 membrane-bounded organelle; GO:0043229 intracellular organelle; GO:0043231 intracellular membrane-bounded organelle; GO:0043233 organelle lumen; GO:0044422 organelle part; GO:…	GO:0003824 catalytic activity; GO:0004180 carboxypeptidase activity; GO:0008233 peptidase activity; GO:0008238 exopeptidase activity; GO:0016787 hydrolase activity; GO:0016805 dipeptidase activity; GO:0070011 peptidase activity, acting on L-amino acid peptides;	K08660	CNDP2; cytosolic nonspecific dipeptidase [EC:3.4.13.18]	dre00330 Arginine and proline metabolism - Danio rerio (zebrafish); dre00340 Histidine metabolism - Danio rerio (zebrafish); dre00410 beta-Alanine metabolism - Danio rerio (zebrafish); dre01100 Metabolic pathways - Danio rerio (zebrafish);
F02_transcript_20668	SELENBP1; selenium binding protein 1; K17285 selenium-binding protein 1 (A)	1.464	Up	dre00920 Sulfur metabolism - Danio rerio (zebrafish); dre01100 Metabolic pathways - Danio rerio (zebrafish);	0.00048075	cytoplasm	GO:0009987 cellular process; GO:0030154 cell differentiation; GO:0032502 developmental process; GO:0045444 fat cell differentiation; GO:0048869 cellular developmental process; GO:0050873 brown fat cell differentiation;	GO:0001650 fibrillar center; GO:0005622 intracellular; GO:0005623 cell; GO:0005634 nucleus; GO:0005730 nucleolus; GO:0031974 membrane-enclosed lumen; GO:0031981 nuclear lumen; GO:0043226 organelle; GO:0043227 membrane-bounded organelle; GO:0043228 non-membrane-bounded organelle; GO:0043229 intracellular organelle; GO:0043231 intracellular membrane-bounded organelle; GO:0043232 intracellular non-m…	GO:0005488 binding; GO:0008430 selenium binding;	K17285	SELENBP1; selenium-binding protein 1	dre00920 Sulfur metabolism - Danio rerio (zebrafish); dre01100 Metabolic pathways - Danio rerio (zebrafish);
F02_transcript_17215	uap1l1, zgc:56509; UDP-N-acetylglucosamine pyrophosphorylase 1, like 1 (EC:2.7.7.-); K00972 UDP-N-acetylglucosamine/UDP-N-acetylgalactosamine diphosphorylase [EC:2.7.7.23 2.7.7.83] (A)	1.463	Up	dre00520 Amino sugar and nucleotide sugar metabolism - Danio rerio (zebrafish); dre01100 Metabolic pathways - Danio rerio (zebrafish);	0.0060167	cytoplasm	GO:0001700 embryonic development via the syncytial blastoderm; GO:0001838 embryonic epithelial tube formation; GO:0002009 morphogenesis of an epithelium; GO:0006022 aminoglycan metabolic process; GO:0006023 aminoglycan biosynthetic process; GO:0006030 chitin metabolic process; GO:0006031 chitin biosynthetic process; GO:0006034 cuticle chitin metabolic process; GO:0006035 cuticle chitin biosynthet…	GO:0005622 intracellular; GO:0005623 cell; GO:0005737 cytoplasm; GO:0005829 cytosol; GO:0044424 intracellular part; GO:0044444 cytoplasmic part; GO:0044464 cell part;	GO:0003824 catalytic activity; GO:0003977 UDP-N-acetylglucosamine diphosphorylase activity; GO:0016740 transferase activity; GO:0016772 transferase activity, transferring phosphorus-containing groups; GO:0016779 nucleotidyltransferase activity; GO:0070569 uridylyltransferase activity;	K00972	UAP1; UDP-N-acetylglucosamine/UDP-N-acetylgalactosamine diphosphorylase [EC:2.7.7.23 2.7.7.83]	dre00520 Amino sugar and nucleotide sugar metabolism - Danio rerio (zebrafish); dre01100 Metabolic pathways - Danio rerio (zebrafish);
F02_transcript_17558	ugp2a, si:ch73-233a22.2; UDP-glucose pyrophosphorylase 2a (EC:2.7.7.9); K00963 UTP--glucose-1-phosphate uridylyltransferase [EC:2.7.7.9] (A)	1.457	Up	dre00040 Pentose and glucuronate interconversions - Danio rerio (zebrafish); dre00052 Galactose metabolism - Danio rerio (zebrafish); dre00500 Starch and sucrose metabolism - Danio rerio (zebrafish); dre00520 Amino sugar and nucleotide sugar metabolism - Danio rerio (zebrafish); dre01100 Metabolic pathways - Danio rerio (zebrafish);	0.0118001	cytoplasm	GO:0000271 polysaccharide biosynthetic process; GO:0005975 carbohydrate metabolic process; GO:0005976 polysaccharide metabolic process; GO:0005977 glycogen metabolic process; GO:0005978 glycogen biosynthetic process; GO:0006011 UDP-glucose metabolic process; GO:0006065 UDP-glucuronate biosynthetic process; GO:0006073 cellular glucan metabolic process; GO:0006082 organic acid metabolic process; GO…	GO:0005622 intracellular; GO:0005623 cell; GO:0005737 cytoplasm; GO:0005829 cytosol; GO:0044424 intracellular part; GO:0044444 cytoplasmic part; GO:0044464 cell part;	GO:0000166 nucleotide binding; GO:0003824 catalytic activity; GO:0003983 UTP:glucose-1-phosphate uridylyltransferase activity; GO:0005488 binding; GO:0005515 protein binding; GO:0005536 glucose binding; GO:0016740 transferase activity; GO:0016772 transferase activity, transferring phosphorus-containing groups; GO:0016779 nucleotidyltransferase activity; GO:0019103 pyrimidine nucleotide binding; G…	K00963	UGP2, galU, galF; UTP--glucose-1-phosphate uridylyltransferase [EC:2.7.7.9]	dre00040 Pentose and glucuronate interconversions - Danio rerio (zebrafish); dre00052 Galactose metabolism - Danio rerio (zebrafish); dre00500 Starch and sucrose metabolism - Danio rerio (zebrafish); dre00520 Amino sugar and nucleotide sugar metabolism - Danio rerio (zebrafish); dre01100 Metabolic pathways - Danio rerio (zebrafish);
F02_transcript_8624	protein-glutamine gamma-glutamyltransferase 2-like; K05622 transglutaminase 5 [EC:2.3.2.13] (A)	1.453	Up		0.00067634	cytoplasm	GO:0006464 cellular protein modification process; GO:0006807 nitrogen compound metabolic process; GO:0007275 multicellular organism development; GO:0008152 metabolic process; GO:0008219 cell death; GO:0008544 epidermis development; GO:0009888 tissue development; GO:0009913 epidermal cell differentiation; GO:0009987 cellular process; GO:0012501 programmed cell death; GO:0019538 protein metabolic p…	GO:0005623 cell; GO:0005886 plasma membrane; GO:0016020 membrane; GO:0044464 cell part; GO:0071944 cell periphery;	GO:0003810 protein-glutamine gamma-glutamyltransferase activity; GO:0003824 catalytic activity; GO:0016740 transferase activity; GO:0016746 transferase activity, transferring acyl groups; GO:0016755 transferase activity, transferring amino-acyl groups;	K05622	TGM5; transglutaminase 5 [EC:2.3.2.13]		PF00868; PF00927	Transglutaminase family; Transglutaminase family, C-terminal ig like domain
F02_transcript_8902	claudin-23-like; K06087 claudin (A)	1.449	Up		0.0055753	plasma membrane	GO:0007155 cell adhesion; GO:0016338 calcium-independent cell-cell adhesion via plasma membrane cell-adhesion molecules; GO:0022610 biological adhesion; GO:0098609 cell-cell adhesion; GO:0098742 cell-cell adhesion via plasma-membrane adhesion molecules;	GO:0005911 cell-cell junction; GO:0005923 bicellular tight junction; GO:0030054 cell junction; GO:0043296 apical junction complex; GO:0070160 occluding junction;	GO:0005488 binding; GO:0005515 protein binding; GO:0042802 identical protein binding;
F02_transcript_773	cbsb, cb442, cbs, wu:fb37g05, wu:fm61c07, wu:fq06c06, zgc:113704; cystathionine-beta-synthase b (EC:4.2.1.22); K01697 cystathionine beta-synthase [EC:4.2.1.22] (A)	1.448	Up	dre00260 Glycine, serine and threonine metabolism - Danio rerio (zebrafish); dre00270 Cysteine and methionine metabolism - Danio rerio (zebrafish); dre01100 Metabolic pathways - Danio rerio (zebrafish); dre01230 Biosynthesis of amino acids - Danio rerio (zebrafish);	0.00028483	cytoplasm	GO:0000003 reproduction; GO:0000096 sulfur amino acid metabolic process; GO:0000097 sulfur amino acid biosynthetic process; GO:0000098 sulfur amino acid catabolic process; GO:0001101 response to acid chemical; GO:0001501 skeletal system development; GO:0001503 ossification; GO:0001666 response to hypoxia; GO:0001932 regulation of protein phosphorylation; GO:0001958 endochondral ossification; GO:0…	GO:0005622 intracellular; GO:0005623 cell; GO:0005634 nucleus; GO:0005737 cytoplasm; GO:0005829 cytosol; GO:0043226 organelle; GO:0043227 membrane-bounded organelle; GO:0043229 intracellular organelle; GO:0043231 intracellular membrane-bounded organelle; GO:0044424 intracellular part; GO:0044444 cytoplasmic part; GO:0044464 cell part;	GO:0003824 catalytic activity; GO:0004122 cystathionine beta-synthase activity; GO:0004124 cysteine synthase activity; GO:0005488 binding; GO:0005515 protein binding; GO:0008144 drug binding; GO:0016491 oxidoreductase activity; GO:0016661 oxidoreductase activity, acting on other nitrogenous compounds as donors; GO:0016662 oxidoreductase activity, acting on other nitrogenous compounds as donors, c…	K01697	CBS; cystathionine beta-synthase [EC:4.2.1.22]	dre00260 Glycine, serine and threonine metabolism - Danio rerio (zebrafish); dre00270 Cysteine and methionine metabolism - Danio rerio (zebrafish); dre01100 Metabolic pathways - Danio rerio (zebrafish); dre01230 Biosynthesis of amino acids - Danio rerio (zebrafish);	PF00571	CBS domain
F02_transcript_19027	IgM precursor [Bos taurus]	1.445	Up		0.0057223	cytoplasm							PF07654; PF00047	Immunoglobulin C1-set domain; Immunoglobulin domain
F02_transcript_29733	alpha-N-acetylgalactosamine-specific lectin-like isoform X1 [Stylophora pistillata]	1.437	Up	dre04145 Phagosome - Danio rerio (zebrafish);	0.0123975	extracellular				K06560	MRC, CD206, CD280; mannose receptor, C type	dre04145 Phagosome - Danio rerio (zebrafish);	PF00059	Lectin C-type domain
F02_transcript_1047	sphingomyelin phosphodiesterase-like; K12350 sphingomyelin phosphodiesterase [EC:3.1.4.12] (A)	1.434	Up	dre00600 Sphingolipid metabolism - Danio rerio (zebrafish); dre01100 Metabolic pathways - Danio rerio (zebrafish); dre04142 Lysosome - Danio rerio (zebrafish); dre04217 Necroptosis - Danio rerio (zebrafish);	0.0197151	plasma membrane	GO:0001932 regulation of protein phosphorylation; GO:0001933 negative regulation of protein phosphorylation; GO:0006469 negative regulation of protein kinase activity; GO:0006629 lipid metabolic process; GO:0006643 membrane lipid metabolic process; GO:0006644 phospholipid metabolic process; GO:0006664 glycolipid metabolic process; GO:0006665 sphingolipid metabolic process; GO:0006672 ceramide met…	GO:0000323 lytic vacuole; GO:0005576 extracellular region; GO:0005615 extracellular space; GO:0005622 intracellular; GO:0005623 cell; GO:0005737 cytoplasm; GO:0005764 lysosome; GO:0005765 lysosomal membrane; GO:0005768 endosome; GO:0005773 vacuole; GO:0005774 vacuolar membrane; GO:0005775 vacuolar lumen; GO:0005886 plasma membrane; GO:0012505 endomembrane system; GO:0016020 membrane; GO:0030141 s…	GO:0003824 catalytic activity; GO:0004620 phospholipase activity; GO:0004767 sphingomyelin phosphodiesterase activity; GO:0005488 binding; GO:0008081 phosphoric diester hydrolase activity; GO:0008270 zinc ion binding; GO:0016298 lipase activity; GO:0016787 hydrolase activity; GO:0016788 hydrolase activity, acting on ester bonds; GO:0042578 phosphoric ester hydrolase activity; GO:0043167 ion bindi…	K12350	SMPD1, ASM; sphingomyelin phosphodiesterase [EC:3.1.4.12]	dre00600 Sphingolipid metabolism - Danio rerio (zebrafish); dre01100 Metabolic pathways - Danio rerio (zebrafish); dre04142 Lysosome - Danio rerio (zebrafish); dre04217 Necroptosis - Danio rerio (zebrafish);	PF00149	Calcineurin-like phosphoesterase
F02_transcript_838	serine/threonine-protein kinase D2-like; K06070 protein kinase D [EC:2.7.11.13] (A)	1.431	Up		0.0038773	nucleus	GO:0002376 immune system process; GO:0006464 cellular protein modification process; GO:0006468 protein phosphorylation; GO:0006793 phosphorus metabolic process; GO:0006796 phosphate-containing compound metabolic process; GO:0006807 nitrogen compound metabolic process; GO:0006950 response to stress; GO:0006952 defense response; GO:0006955 immune response; GO:0007154 cell communication; GO:0007165 …	GO:0005622 intracellular; GO:0005623 cell; GO:0005737 cytoplasm; GO:0005829 cytosol; GO:0005886 plasma membrane; GO:0009898 cytoplasmic side of plasma membrane; GO:0016020 membrane; GO:0032991 macromolecular complex; GO:0044424 intracellular part; GO:0044425 membrane part; GO:0044444 cytoplasmic part; GO:0044459 plasma membrane part; GO:0044464 cell part; GO:0061695 transferase complex, transferr…	GO:0003824 catalytic activity; GO:0004672 protein kinase activity; GO:0004674 protein serine/threonine kinase activity; GO:0005488 binding; GO:0005515 protein binding; GO:0016301 kinase activity; GO:0016740 transferase activity; GO:0016772 transferase activity, transferring phosphorus-containing groups; GO:0016773 phosphotransferase activity, alcohol group as acceptor; GO:0042802 identical protei…	K06070	PKD; protein kinase D [EC:2.7.11.13]		PF00130; PF00169; PF00069	Phorbol esters/diacylglycerol binding domain (C1 domain); PH domain; Protein kinase domain
F02_transcript_6108	complement factor B-like; K01335 component factor B [EC:3.4.21.47] (A)	1.429	Up		0.00054169	cytoplasm	GO:0002250 adaptive immune response; GO:0002252 immune effector process; GO:0002253 activation of immune response; GO:0002376 immune system process; GO:0002443 leukocyte mediated immunity; GO:0002449 lymphocyte mediated immunity; GO:0002455 humoral immune response mediated by circulating immunoglobulin; GO:0002460 adaptive immune response based on somatic recombination of immune receptors built f…	GO:0005576 extracellular region; GO:0005615 extracellular space; GO:0005623 cell; GO:0005886 plasma membrane; GO:0016020 membrane; GO:0044421 extracellular region part; GO:0044464 cell part; GO:0071944 cell periphery;	GO:0001848 complement binding; GO:0003824 catalytic activity; GO:0004175 endopeptidase activity; GO:0004252 serine-type endopeptidase activity; GO:0005488 binding; GO:0005515 protein binding; GO:0008233 peptidase activity; GO:0008236 serine-type peptidase activity; GO:0016787 hydrolase activity; GO:0017171 serine hydrolase activity; GO:0070011 peptidase activity, acting on L-amino acid peptides;	K01335	CFB; component factor B [EC:3.4.21.47]		PF00084; PF00092	Sushi domain (SCR repeat); von Willebrand factor type A domain
F02_transcript_19612	eukaryotic translation initiation factor 3 subunit D-like; K03251 translation initiation factor 3 subunit D (A)	1.428	Up	dre03013 RNA transport - Danio rerio (zebrafish);	0.02558	cytoplasm	GO:0002181 cytoplasmic translation; GO:0002183 cytoplasmic translational initiation; GO:0002191 cap-dependent translational initiation; GO:0006412 translation; GO:0006413 translational initiation; GO:0006417 regulation of translation; GO:0006446 regulation of translational initiation; GO:0006518 peptide metabolic process; GO:0006807 nitrogen compound metabolic process; GO:0008152 metabolic proces…	GO:0005622 intracellular; GO:0005623 cell; GO:0005634 nucleus; GO:0005737 cytoplasm; GO:0005829 cytosol; GO:0005852 eukaryotic translation initiation factor 3 complex; GO:0032991 macromolecular complex; GO:0043226 organelle; GO:0043227 membrane-bounded organelle; GO:0043229 intracellular organelle; GO:0043231 intracellular membrane-bounded organelle; GO:0044424 intracellular part; GO:0044444 cyto…	GO:0000339 RNA cap binding; GO:0003676 nucleic acid binding; GO:0003723 RNA binding; GO:0003729 mRNA binding; GO:0003743 translation initiation factor activity; GO:0005488 binding; GO:0005515 protein binding; GO:0008135 translation factor activity, RNA binding; GO:0097159 organic cyclic compound binding; GO:0098808 mRNA cap binding; GO:1901363 heterocyclic compound binding;	K03251	EIF3D; translation initiation factor 3 subunit D	dre03013 RNA transport - Danio rerio (zebrafish);
F02_transcript_686	mucin-2 precursor [Gallus gallus]	1.42	Up		0.025663	extracellular	GO:0001894 tissue homeostasis; GO:0002064 epithelial cell development; GO:0003008 system process; GO:0006915 apoptotic process; GO:0007586 digestion; GO:0008219 cell death; GO:0008285 negative regulation of cell proliferation; GO:0009888 tissue development; GO:0009987 cellular process; GO:0010669 epithelial structure maintenance; GO:0010941 regulation of cell death; GO:0010942 positive regulation…	GO:0005576 extracellular region; GO:0031012 extracellular matrix; GO:0044421 extracellular region part; GO:0070701 mucus layer; GO:0070702 inner mucus layer; GO:0070703 outer mucus layer;					PF00007	Cystine-knot domain
F02_transcript_27122	gstp1, cb356, wu:fa02f07, wu:fj23a02, zgc:103706; glutathione S-transferase pi 1; K00799 glutathione S-transferase [EC:2.5.1.18] (A)	1.419	Up	dre00480 Glutathione metabolism - Danio rerio (zebrafish); dre00980 Metabolism of xenobiotics by cytochrome P450 - Danio rerio (zebrafish); dre00982 Drug metabolism - cytochrome P450 - Danio rerio (zebrafish); dre00983 Drug metabolism - other enzymes - Danio rerio (zebrafish); dre01100 Metabolic pathways - Danio rerio (zebrafish);	9.5265e-05	mitochondria	GO:0000302 response to reactive oxygen species; GO:0001101 response to acid chemical; GO:0001676 long-chain fatty acid metabolic process; GO:0001775 cell activation; GO:0001817 regulation of cytokine production; GO:0001818 negative regulation of cytokine production; GO:0001932 regulation of protein phosphorylation; GO:0001933 negative regulation of protein phosphorylation; GO:0001959 regulation o…	GO:0005576 extracellular region; GO:0005622 intracellular; GO:0005623 cell; GO:0005634 nucleus; GO:0005737 cytoplasm; GO:0005739 mitochondrion; GO:0005829 cytosol; GO:0005886 plasma membrane; GO:0012505 endomembrane system; GO:0016020 membrane; GO:0030141 secretory granule; GO:0031410 cytoplasmic vesicle; GO:0031974 membrane-enclosed lumen; GO:0031982 vesicle; GO:0031983 vesicle lumen; GO:0032991…	GO:0003824 catalytic activity; GO:0004364 glutathione transferase activity; GO:0004601 peroxidase activity; GO:0004602 glutathione peroxidase activity; GO:0005488 binding; GO:0005515 protein binding; GO:0008144 drug binding; GO:0008432 JUN kinase binding; GO:0016209 antioxidant activity; GO:0016491 oxidoreductase activity; GO:0016684 oxidoreductase activity, acting on peroxide as acceptor; GO:001…	K00799	GST, gst; glutathione S-transferase [EC:2.5.1.18]	dre00480 Glutathione metabolism - Danio rerio (zebrafish); dre00980 Metabolism of xenobiotics by cytochrome P450 - Danio rerio (zebrafish); dre00982 Drug metabolism - cytochrome P450 - Danio rerio (zebrafish); dre00983 Drug metabolism - other enzymes - Danio rerio (zebrafish); dre01100 Metabolic pathways - Danio rerio (zebrafish);	PF02798	Glutathione S-transferase, N-terminal domain
F02_transcript_21570	ada, zgc:92028; adenosine deaminase (EC:3.5.4.4); K01488 adenosine deaminase [EC:3.5.4.4] (A)	1.416	Up	dre00230 Purine metabolism - Danio rerio (zebrafish); dre01100 Metabolic pathways - Danio rerio (zebrafish);	0.025018	cytoplasm	GO:0001775 cell activation; GO:0002376 immune system process; GO:0006139 nucleobase-containing compound metabolic process; GO:0006144 purine nucleobase metabolic process; GO:0006152 purine nucleoside catabolic process; GO:0006154 adenosine catabolic process; GO:0006725 cellular aromatic compound metabolic process; GO:0006807 nitrogen compound metabolic process; GO:0008152 metabolic process; GO:00…	GO:0005622 intracellular; GO:0005623 cell; GO:0005737 cytoplasm; GO:0005829 cytosol; GO:0005886 plasma membrane; GO:0009897 external side of plasma membrane; GO:0009986 cell surface; GO:0016020 membrane; GO:0044424 intracellular part; GO:0044425 membrane part; GO:0044444 cytoplasmic part; GO:0044459 plasma membrane part; GO:0044464 cell part; GO:0071944 cell periphery; GO:0098552 side of membrane;	GO:0003824 catalytic activity; GO:0004000 adenosine deaminase activity; GO:0005488 binding; GO:0008270 zinc ion binding; GO:0016787 hydrolase activity; GO:0016810 hydrolase activity, acting on carbon-nitrogen (but not peptide) bonds; GO:0016814 hydrolase activity, acting on carbon-nitrogen (but not peptide) bonds, in cyclic amidines; GO:0019239 deaminase activity; GO:0043167 ion binding; GO:00431…	K01488	add, ADA; adenosine deaminase [EC:3.5.4.4]	dre00230 Purine metabolism - Danio rerio (zebrafish); dre01100 Metabolic pathways - Danio rerio (zebrafish);	PF00962	Adenosine/AMP deaminase
F02_transcript_28526	MGC52578; HMG-X protein; K11295 high mobility group protein B2 (A)	1.413	Up		0.025859	nucleus	GO:0000003 reproduction; GO:0000737 DNA catabolic process, endonucleolytic; GO:0001817 regulation of cytokine production; GO:0001819 positive regulation of cytokine production; GO:0001936 regulation of endothelial cell proliferation; GO:0001938 positive regulation of endothelial cell proliferation; GO:0002200 somatic diversification of immune receptors; GO:0002237 response to molecule of bacteria…	GO:0000228 nuclear chromosome; GO:0000785 chromatin; GO:0000790 nuclear chromatin; GO:0000793 condensed chromosome; GO:0005576 extracellular region; GO:0005615 extracellular space; GO:0005622 intracellular; GO:0005623 cell; GO:0005634 nucleus; GO:0005654 nucleoplasm; GO:0005694 chromosome; GO:0005730 nucleolus; GO:0005737 cytoplasm; GO:0031974 membrane-enclosed lumen; GO:0031981 nuclear lumen; GO…	GO:0000217 DNA secondary structure binding; GO:0000400 four-way junction DNA binding; GO:0000976 transcription regulatory region sequence-specific DNA binding; GO:0001067 regulatory region nucleic acid binding; GO:0001158 enhancer sequence-specific DNA binding; GO:0003676 nucleic acid binding; GO:0003677 DNA binding; GO:0003682 chromatin binding; GO:0003684 damaged DNA binding; GO:0003690 double-…	K11295	HMGB2; high mobility group protein B2		PF09011; PF00505	Domain of unknown function (DUF1898); HMG (high mobility group) box
F02_transcript_28394	gstp1, cb356, wu:fa02f07, wu:fj23a02, zgc:103706; glutathione S-transferase pi 1; K00799 glutathione S-transferase [EC:2.5.1.18] (A)	1.411	Up	dre00480 Glutathione metabolism - Danio rerio (zebrafish); dre00980 Metabolism of xenobiotics by cytochrome P450 - Danio rerio (zebrafish); dre00982 Drug metabolism - cytochrome P450 - Danio rerio (zebrafish); dre00983 Drug metabolism - other enzymes - Danio rerio (zebrafish); dre01100 Metabolic pathways - Danio rerio (zebrafish);	0.03418	cytoplasm	GO:0000302 response to reactive oxygen species; GO:0001101 response to acid chemical; GO:0001676 long-chain fatty acid metabolic process; GO:0001775 cell activation; GO:0001817 regulation of cytokine production; GO:0001818 negative regulation of cytokine production; GO:0001932 regulation of protein phosphorylation; GO:0001933 negative regulation of protein phosphorylation; GO:0001959 regulation o…	GO:0005576 extracellular region; GO:0005622 intracellular; GO:0005623 cell; GO:0005634 nucleus; GO:0005737 cytoplasm; GO:0005739 mitochondrion; GO:0005829 cytosol; GO:0005886 plasma membrane; GO:0012505 endomembrane system; GO:0016020 membrane; GO:0030141 secretory granule; GO:0031410 cytoplasmic vesicle; GO:0031974 membrane-enclosed lumen; GO:0031982 vesicle; GO:0031983 vesicle lumen; GO:0032991…	GO:0003824 catalytic activity; GO:0004364 glutathione transferase activity; GO:0004601 peroxidase activity; GO:0004602 glutathione peroxidase activity; GO:0005488 binding; GO:0005515 protein binding; GO:0008144 drug binding; GO:0008432 JUN kinase binding; GO:0016209 antioxidant activity; GO:0016491 oxidoreductase activity; GO:0016684 oxidoreductase activity, acting on peroxide as acceptor; GO:001…	K00799	GST, gst; glutathione S-transferase [EC:2.5.1.18]	dre00480 Glutathione metabolism - Danio rerio (zebrafish); dre00980 Metabolism of xenobiotics by cytochrome P450 - Danio rerio (zebrafish); dre00982 Drug metabolism - cytochrome P450 - Danio rerio (zebrafish); dre00983 Drug metabolism - other enzymes - Danio rerio (zebrafish); dre01100 Metabolic pathways - Danio rerio (zebrafish);
F02_transcript_3905	Uncharacterized protein	1.402	Up		0.0009202	cytoplasm	GO:0000902 cell morphogenesis; GO:0000904 cell morphogenesis involved in differentiation; GO:0002064 epithelial cell development; GO:0003382 epithelial cell morphogenesis; GO:0006996 organelle organization; GO:0007010 cytoskeleton organization; GO:0007015 actin filament organization; GO:0007043 cell-cell junction assembly; GO:0009653 anatomical structure morphogenesis; GO:0009888 tissue developme…	GO:0005622 intracellular; GO:0005623 cell; GO:0005856 cytoskeleton; GO:0005884 actin filament; GO:0005911 cell-cell junction; GO:0005912 adherens junction; GO:0005923 bicellular tight junction; GO:0015629 actin cytoskeleton; GO:0030054 cell junction; GO:0030057 desmosome; GO:0043226 organelle; GO:0043228 non-membrane-bounded organelle; GO:0043229 intracellular organelle; GO:0043232 intracellular …	GO:0003779 actin binding; GO:0005488 binding; GO:0005515 protein binding; GO:0008092 cytoskeletal protein binding; GO:0044877 macromolecular complex binding; GO:0051015 actin filament binding;
F02_transcript_13429	Uncharacterized protein	1.402	Up		0.00101574	cytoplasm
F02_transcript_19582	Neudesin [Stylophora pistillata]	1.393	Up		0.012779	extracellular	GO:0001932 regulation of protein phosphorylation; GO:0001934 positive regulation of protein phosphorylation; GO:0009605 response to external stimulus; GO:0009893 positive regulation of metabolic process; GO:0009966 regulation of signal transduction; GO:0009967 positive regulation of signal transduction; GO:0009991 response to extracellular stimulus; GO:0010469 regulation of receptor activity; GO:…	GO:0005576 extracellular region; GO:0005615 extracellular space; GO:0005622 intracellular; GO:0005623 cell; GO:0005634 nucleus; GO:0005654 nucleoplasm; GO:0012505 endomembrane system; GO:0016020 membrane; GO:0031974 membrane-enclosed lumen; GO:0031981 nuclear lumen; GO:0043226 organelle; GO:0043227 membrane-bounded organelle; GO:0043229 intracellular organelle; GO:0043231 intracellular membrane-b…	GO:0005102 receptor binding; GO:0005488 binding; GO:0005515 protein binding; GO:0008083 growth factor activity; GO:0030545 receptor regulator activity; GO:0048018 receptor agonist activity; GO:0098772 molecular function regulator;				PF00173	Cytochrome b5-like Heme/Steroid binding domain
F02_transcript_14973	Uncharacterized protein	1.376	Up		0.000198541	cytoplasm	GO:0000041 transition metal ion transport; GO:0001881 receptor recycling; GO:0006810 transport; GO:0006811 ion transport; GO:0006812 cation transport; GO:0006826 iron ion transport; GO:0008104 protein localization; GO:0008152 metabolic process; GO:0009987 cellular process; GO:0015031 protein transport; GO:0015682 ferric iron transport; GO:0015833 peptide transport; GO:0023051 regulation of signal…	GO:0005622 intracellular; GO:0005623 cell; GO:0005737 cytoplasm; GO:0005768 endosome; GO:0010008 endosome membrane; GO:0012505 endomembrane system; GO:0016020 membrane; GO:0031090 organelle membrane; GO:0031410 cytoplasmic vesicle; GO:0031982 vesicle; GO:0043226 organelle; GO:0043227 membrane-bounded organelle; GO:0043229 intracellular organelle; GO:0044422 organelle part; GO:0044424 intracellula…		K20243	REP15; Rab15 effector protein
F02_transcript_22479	ferritin heavy chain [Mus musculus]	1.369	Up		0.030801	mitochondria							PF00210	Ferritin-like domain
F02_transcript_29367	Uncharacterized protein	1.366	Up		0.028255	mitochondria	GO:0001708 cell fate specification; GO:0007275 multicellular organism development; GO:0008283 cell proliferation; GO:0009987 cellular process; GO:0030154 cell differentiation; GO:0031016 pancreas development; GO:0031017 exocrine pancreas development; GO:0032501 multicellular organismal process; GO:0032502 developmental process; GO:0035272 exocrine system development; GO:0045165 cell fate commitme…
F02_transcript_21823	Uncharacterized protein	1.365	Up		0.0120778	mitochondria
F02_transcript_29813	Fibroleukin [Stylophora pistillata]	1.354	Up	dre04145 Phagosome - Danio rerio (zebrafish);	0.0167351	extracellular				K06560	MRC, CD206, CD280; mannose receptor, C type	dre04145 Phagosome - Danio rerio (zebrafish);	PF00059	Lectin C-type domain
F02_transcript_22467	gnpda2, si:dkey-185e18.2; glucosamine-6-phosphate deaminase 2; K02564 glucosamine-6-phosphate deaminase [EC:3.5.99.6] (A)	1.35	Up	dre00520 Amino sugar and nucleotide sugar metabolism - Danio rerio (zebrafish); dre01100 Metabolic pathways - Danio rerio (zebrafish);	0.0036231	cytoplasm	GO:0006040 amino sugar metabolic process; GO:0006041 glucosamine metabolic process; GO:0006043 glucosamine catabolic process; GO:0006044 N-acetylglucosamine metabolic process; GO:0006091 generation of precursor metabolites and energy; GO:0008152 metabolic process; GO:0009056 catabolic process; GO:0009987 cellular process; GO:0044237 cellular metabolic process; GO:0046348 amino sugar catabolic pro…	GO:0005622 intracellular; GO:0005623 cell; GO:0005737 cytoplasm; GO:0005829 cytosol; GO:0044424 intracellular part; GO:0044444 cytoplasmic part; GO:0044464 cell part;	GO:0003824 catalytic activity; GO:0004342 glucosamine-6-phosphate deaminase activity; GO:0016787 hydrolase activity; GO:0016853 isomerase activity; GO:0016860 intramolecular oxidoreductase activity; GO:0016861 intramolecular oxidoreductase activity, interconverting aldoses and ketoses; GO:0019239 deaminase activity;	K02564	nagB, GNPDA; glucosamine-6-phosphate deaminase [EC:3.5.99.6]	dre00520 Amino sugar and nucleotide sugar metabolism - Danio rerio (zebrafish); dre01100 Metabolic pathways - Danio rerio (zebrafish);	PF01182	Glucosamine-6-phosphate isomerases/6-phosphogluconolactonase
F02_transcript_29627	cystatin-like; K13899 cystatin-C (A)	1.348	Up		0.0050411	extracellular				K13899	CST3; cystatin-C		PF00031	Cystatin domain
F02_transcript_8857	tktb, cb860, fb38f03, fj52f12, id:ibd3270, tkt, wu:cegs2794, wu:fb38f03, wu:fj52f12; transketolase b (EC:2.2.1.1); K00615 transketolase [EC:2.2.1.1] (A)	1.347	Up	dre00030 Pentose phosphate pathway - Danio rerio (zebrafish); dre01100 Metabolic pathways - Danio rerio (zebrafish); dre01200 Carbon metabolism - Danio rerio (zebrafish); dre01230 Biosynthesis of amino acids - Danio rerio (zebrafish);	0.021681	cytoplasm	GO:0006355 regulation of transcription, DNA-templated; GO:0009889 regulation of biosynthetic process; GO:0010468 regulation of gene expression; GO:0010556 regulation of macromolecule biosynthetic process; GO:0019219 regulation of nucleobase-containing compound metabolic process; GO:0019222 regulation of metabolic process; GO:0031323 regulation of cellular metabolic process; GO:0031326 regulation …	GO:0005622 intracellular; GO:0005623 cell; GO:0005737 cytoplasm; GO:0044424 intracellular part; GO:0044464 cell part;		K00615	E2.2.1.1, tktA, tktB; transketolase [EC:2.2.1.1]	dre00030 Pentose phosphate pathway - Danio rerio (zebrafish); dre01100 Metabolic pathways - Danio rerio (zebrafish); dre01200 Carbon metabolism - Danio rerio (zebrafish); dre01230 Biosynthesis of amino acids - Danio rerio (zebrafish);	PF00456; PF02779; PF02780	Transketolase, thiamine diphosphate binding domain; Transketolase, pyrimidine binding domain; Transketolase, C-terminal domain
F02_transcript_28805	blvrb, cb1064, wu:fb73f01, zgc:91854; biliverdin reductase B (EC:1.3.1.24); K05901 biliverdin reductase / flavin reductase [EC:1.3.1.24 1.5.1.30] (A)	1.344	Up	dre00740 Riboflavin metabolism - Danio rerio (zebrafish); dre00860 Porphyrin and chlorophyll metabolism - Danio rerio (zebrafish); dre01100 Metabolic pathways - Danio rerio (zebrafish);	0.00129606	cytoplasm	GO:0000003 reproduction; GO:0006725 cellular aromatic compound metabolic process; GO:0006778 porphyrin-containing compound metabolic process; GO:0006787 porphyrin-containing compound catabolic process; GO:0006807 nitrogen compound metabolic process; GO:0008152 metabolic process; GO:0009056 catabolic process; GO:0009987 cellular process; GO:0019439 aromatic compound catabolic process; GO:0032501 m…	GO:0005622 intracellular; GO:0005623 cell; GO:0005634 nucleus; GO:0005654 nucleoplasm; GO:0005737 cytoplasm; GO:0005829 cytosol; GO:0005886 plasma membrane; GO:0016020 membrane; GO:0030424 axon; GO:0031974 membrane-enclosed lumen; GO:0031981 nuclear lumen; GO:0033267 axon part; GO:0042995 cell projection; GO:0043005 neuron projection; GO:0043195 terminal bouton; GO:0043226 organelle; GO:0043227 m…	GO:0003824 catalytic activity; GO:0004074 biliverdin reductase activity; GO:0016491 oxidoreductase activity; GO:0016627 oxidoreductase activity, acting on the CH-CH group of donors; GO:0016628 oxidoreductase activity, acting on the CH-CH group of donors, NAD or NADP as acceptor; GO:0016645 oxidoreductase activity, acting on the CH-NH group of donors; GO:0016646 oxidoreductase activity, acting on …	K05901	BLVRB; biliverdin reductase / flavin reductase [EC:1.3.1.24 1.5.1.30]	dre00740 Riboflavin metabolism - Danio rerio (zebrafish); dre00860 Porphyrin and chlorophyll metabolism - Danio rerio (zebrafish); dre01100 Metabolic pathways - Danio rerio (zebrafish);	PF13460	NADH(P)-binding
F02_transcript_10370	MACRO domain-containing protein 2, partial [Stegodyphus mimosarum]	1.344	Up		0.039678	nucleus	GO:0006139 nucleobase-containing compound metabolic process; GO:0006464 cellular protein modification process; GO:0006725 cellular aromatic compound metabolic process; GO:0006807 nitrogen compound metabolic process; GO:0006950 response to stress; GO:0006974 cellular response to DNA damage stimulus; GO:0007275 multicellular organism development; GO:0007399 nervous system development; GO:0007417 ce…	GO:0005622 intracellular; GO:0005623 cell; GO:0005634 nucleus; GO:0005730 nucleolus; GO:0005813 centrosome; GO:0005815 microtubule organizing center; GO:0005856 cytoskeleton; GO:0015630 microtubule cytoskeleton; GO:0031974 membrane-enclosed lumen; GO:0031981 nuclear lumen; GO:0043226 organelle; GO:0043227 membrane-bounded organelle; GO:0043228 non-membrane-bounded organelle; GO:0043229 intracellu…	GO:0003824 catalytic activity; GO:0016787 hydrolase activity; GO:0016798 hydrolase activity, acting on glycosyl bonds; GO:0019213 deacetylase activity;	K23518			PF01661	Macro domain
F02_transcript_23931	gmds, dZ84G17.1, si:ch211-231n5.3, srn, twd, zgc:63772; GDP-mannose 4,6-dehydratase (EC:4.2.1.47); K01711 GDPmannose 4,6-dehydratase [EC:4.2.1.47] (A)	1.343	Up	dre00051 Fructose and mannose metabolism - Danio rerio (zebrafish); dre00520 Amino sugar and nucleotide sugar metabolism - Danio rerio (zebrafish); dre01100 Metabolic pathways - Danio rerio (zebrafish);	0.00199655	mitochondria	GO:0000003 reproduction; GO:0003006 developmental process involved in reproduction; GO:0006139 nucleobase-containing compound metabolic process; GO:0006725 cellular aromatic compound metabolic process; GO:0006793 phosphorus metabolic process; GO:0006807 nitrogen compound metabolic process; GO:0007154 cell communication; GO:0007165 signal transduction; GO:0007166 cell surface receptor signaling pa…	GO:0005622 intracellular; GO:0005623 cell; GO:0005737 cytoplasm; GO:0005829 cytosol; GO:0044424 intracellular part; GO:0044444 cytoplasmic part; GO:0044464 cell part;	GO:0000166 nucleotide binding; GO:0003824 catalytic activity; GO:0005488 binding; GO:0005515 protein binding; GO:0008446 GDP-mannose 4,6-dehydratase activity; GO:0016829 lyase activity; GO:0016835 carbon-oxygen lyase activity; GO:0016836 hydro-lyase activity; GO:0036094 small molecule binding; GO:0042802 identical protein binding; GO:0043167 ion binding; GO:0043168 anion binding; GO:0048037 cofac…	K01711	gmd, GMDS; GDPmannose 4,6-dehydratase [EC:4.2.1.47]	dre00051 Fructose and mannose metabolism - Danio rerio (zebrafish); dre00520 Amino sugar and nucleotide sugar metabolism - Danio rerio (zebrafish); dre01100 Metabolic pathways - Danio rerio (zebrafish);
F02_transcript_4946	AP-5 complex subunit beta-1-like [Stylophora pistillata]	1.342	Up		0.028437	cytoplasm,mitochondria	GO:0006810 transport; GO:0016192 vesicle-mediated transport; GO:0016197 endosomal transport; GO:0046907 intracellular transport; GO:0051179 localization; GO:0051234 establishment of localization; GO:0051641 cellular localization; GO:0051649 establishment of localization in cell;	GO:0005622 intracellular; GO:0005623 cell; GO:0005737 cytoplasm; GO:0016020 membrane; GO:0030117 membrane coat; GO:0030119 AP-type membrane coat adaptor complex; GO:0032991 macromolecular complex; GO:0044424 intracellular part; GO:0044425 membrane part; GO:0044444 cytoplasmic part; GO:0044464 cell part; GO:0048475 coated membrane; GO:0098796 membrane protein complex;		K19022	AP5B1; AP-5 complex subunit beta-1
F02_transcript_3621	Uncharacterized protein	1.334	Up		0.0023609	cytoplasm				K22909
F02_transcript_17922	Doublesex- and mab-3-related transcription factor A2, partial [Zootermopsis nevadensis]	1.333	Up		0.0074617	mitochondria	GO:0000003 reproduction; GO:0001541 ovarian follicle development; GO:0003006 developmental process involved in reproduction; GO:0006355 regulation of transcription, DNA-templated; GO:0006357 regulation of transcription from RNA polymerase II promoter; GO:0007275 multicellular organism development; GO:0007548 sex differentiation; GO:0007610 behavior; GO:0007617 mating behavior; GO:0007618 mating; …		GO:0000981 RNA polymerase II transcription factor activity, sequence-specific DNA binding; GO:0003676 nucleic acid binding; GO:0003677 DNA binding; GO:0003700 transcription factor activity, sequence-specific DNA binding; GO:0005488 binding; GO:0005515 protein binding; GO:0042802 identical protein binding; GO:0042803 protein homodimerization activity; GO:0043565 sequence-specific DNA binding; GO:0…	K19491	DMRT4_5, DMRTA; doublesex- and mab-3-related transcription factor 4/5		PF03474	DMRTA motif
F02_transcript_21647	gss, sb:cb814, zgc:101574; glutathione synthetase (EC:6.3.2.3); K01920 glutathione synthase [EC:6.3.2.3] (A)	1.333	Up	dre00270 Cysteine and methionine metabolism - Danio rerio (zebrafish); dre00480 Glutathione metabolism - Danio rerio (zebrafish); dre01100 Metabolic pathways - Danio rerio (zebrafish); dre04216 Ferroptosis - Danio rerio (zebrafish);	0.0149635	cytoplasm	GO:0001101 response to acid chemical; GO:0006082 organic acid metabolic process; GO:0006518 peptide metabolic process; GO:0006520 cellular amino acid metabolic process; GO:0006575 cellular modified amino acid metabolic process; GO:0006749 glutathione metabolic process; GO:0006750 glutathione biosynthetic process; GO:0006790 sulfur compound metabolic process; GO:0006807 nitrogen compound metabolic…	GO:0005622 intracellular; GO:0005623 cell; GO:0005737 cytoplasm; GO:0005829 cytosol; GO:0044424 intracellular part; GO:0044444 cytoplasmic part; GO:0044464 cell part;	GO:0000166 nucleotide binding; GO:0000287 magnesium ion binding; GO:0003824 catalytic activity; GO:0004363 glutathione synthase activity; GO:0005488 binding; GO:0005515 protein binding; GO:0005524 ATP binding; GO:0008144 drug binding; GO:0016594 glycine binding; GO:0016597 amino acid binding; GO:0016874 ligase activity; GO:0016879 ligase activity, forming carbon-nitrogen bonds; GO:0016881 acid-am…	K21456	GSS; glutathione synthase [EC:6.3.2.3]	dre00270 Cysteine and methionine metabolism - Danio rerio (zebrafish); dre00480 Glutathione metabolism - Danio rerio (zebrafish); dre01100 Metabolic pathways - Danio rerio (zebrafish); dre04216 Ferroptosis - Danio rerio (zebrafish);	PF03917; PF03199	Eukaryotic glutathione synthase, ATP binding domain; Eukaryotic glutathione synthase
F02_transcript_10743	CASP6; caspase 6, apoptosis-related cysteine peptidase; K04396 caspase 6 [EC:3.4.22.59] (A)	1.333	Up	dre04210 Apoptosis - Danio rerio (zebrafish);	0.0179394	cytoplasm	GO:0000302 response to reactive oxygen species; GO:0001654 eye development; GO:0002088 lens development in camera-type eye; GO:0002525 acute inflammatory response to non-antigenic stimulus; GO:0002526 acute inflammatory response; GO:0006508 proteolysis; GO:0006807 nitrogen compound metabolic process; GO:0006915 apoptotic process; GO:0006950 response to stress; GO:0006952 defense response; GO:0006…	GO:0005622 intracellular; GO:0005623 cell; GO:0005634 nucleus; GO:0005654 nucleoplasm; GO:0005737 cytoplasm; GO:0005829 cytosol; GO:0031974 membrane-enclosed lumen; GO:0031981 nuclear lumen; GO:0043226 organelle; GO:0043227 membrane-bounded organelle; GO:0043229 intracellular organelle; GO:0043231 intracellular membrane-bounded organelle; GO:0043233 organelle lumen; GO:0044422 organelle part; GO:…	GO:0003824 catalytic activity; GO:0004175 endopeptidase activity; GO:0004197 cysteine-type endopeptidase activity; GO:0005488 binding; GO:0005515 protein binding; GO:0008233 peptidase activity; GO:0008234 cysteine-type peptidase activity; GO:0016787 hydrolase activity; GO:0042802 identical protein binding; GO:0070011 peptidase activity, acting on L-amino acid peptides; GO:0097153 cysteine-type en…	K04396	CASP6; caspase 6 [EC:3.4.22.59]	dre04210 Apoptosis - Danio rerio (zebrafish);	PF00656	Caspase domain
F02_transcript_992	alpha-2-macroglobulin-like protein 1-like; K03910 alpha-2-macroglobulin (A)	1.332	Up		0.00115915	extracellular				K23593			PF01835; PF07703; PF07678; PF07677	MG2 domain; Alpha-2-macroglobulin family N-terminal region; A-macroglobulin complement component; A-macroglobulin receptor
F02_transcript_8496	p4hb, psmb3, zgc:92596; prolyl 4-hydroxylase, beta polypeptide (EC:5.3.4.1); K09580 protein disulfide-isomerase A1 [EC:5.3.4.1] (A)	1.33	Up	dre04141 Protein processing in endoplasmic reticulum - Danio rerio (zebrafish);	0.009297	extracellular	GO:0001666 response to hypoxia; GO:0006082 organic acid metabolic process; GO:0006457 protein folding; GO:0006464 cellular protein modification process; GO:0006520 cellular amino acid metabolic process; GO:0006575 cellular modified amino acid metabolic process; GO:0006807 nitrogen compound metabolic process; GO:0006950 response to stress; GO:0007154 cell communication; GO:0007165 signal transduct…	GO:0005576 extracellular region; GO:0005622 intracellular; GO:0005623 cell; GO:0005737 cytoplasm; GO:0005783 endoplasmic reticulum; GO:0005788 endoplasmic reticulum lumen; GO:0005793 endoplasmic reticulum-Golgi intermediate compartment; GO:0005886 plasma membrane; GO:0009897 external side of plasma membrane; GO:0009986 cell surface; GO:0012505 endomembrane system; GO:0016020 membrane; GO:0016222 …	GO:0003756 protein disulfide isomerase activity; GO:0003810 protein-glutamine gamma-glutamyltransferase activity; GO:0003824 catalytic activity; GO:0004656 procollagen-proline 4-dioxygenase activity; GO:0005102 receptor binding; GO:0005178 integrin binding; GO:0005488 binding; GO:0005515 protein binding; GO:0015036 disulfide oxidoreductase activity; GO:0015037 peptide disulfide oxidoreductase act…	K09580	PDIA1, P4HB; protein disulfide-isomerase A1 [EC:5.3.4.1]	dre04141 Protein processing in endoplasmic reticulum - Danio rerio (zebrafish);	PF00085; PF13848	Thioredoxin; Thioredoxin-like domain
F02_transcript_1780	major vault protein-like; K17266 major vault protein (A)	1.329	Up		0.0194568	cytoplasm	GO:0001654 eye development; GO:0001775 cell activation; GO:0001932 regulation of protein phosphorylation; GO:0001933 negative regulation of protein phosphorylation; GO:0002252 immune effector process; GO:0002263 cell activation involved in immune response; GO:0002274 myeloid leukocyte activation; GO:0002275 myeloid cell activation involved in immune response; GO:0002283 neutrophil activation invo…	GO:0005576 extracellular region; GO:0005622 intracellular; GO:0005623 cell; GO:0005634 nucleus; GO:0005737 cytoplasm; GO:0005829 cytosol; GO:0005856 cytoskeleton; GO:0012505 endomembrane system; GO:0030141 secretory granule; GO:0031410 cytoplasmic vesicle; GO:0031974 membrane-enclosed lumen; GO:0031982 vesicle; GO:0031983 vesicle lumen; GO:0034774 secretory granule lumen; GO:0043226 organelle; GO…	GO:0005488 binding; GO:0005515 protein binding; GO:0019899 enzyme binding; GO:0019900 kinase binding; GO:0019901 protein kinase binding; GO:0019902 phosphatase binding; GO:0019903 protein phosphatase binding; GO:0042802 identical protein binding;	K17266	MVP; major vault protein		PF11978	Shoulder domain
F02_transcript_21540	histidine ammonia-lyase-like; K01745 histidine ammonia-lyase [EC:4.3.1.3] (A)	1.329	Up	dre00340 Histidine metabolism - Danio rerio (zebrafish); dre01100 Metabolic pathways - Danio rerio (zebrafish);	0.0037021	cytoskeleton	GO:0006082 organic acid metabolic process; GO:0006520 cellular amino acid metabolic process; GO:0006547 histidine metabolic process; GO:0006548 histidine catabolic process; GO:0006725 cellular aromatic compound metabolic process; GO:0006807 nitrogen compound metabolic process; GO:0006950 response to stress; GO:0008152 metabolic process; GO:0009056 catabolic process; GO:0009063 cellular amino acid…	GO:0005622 intracellular; GO:0005623 cell; GO:0005737 cytoplasm; GO:0005829 cytosol; GO:0044424 intracellular part; GO:0044444 cytoplasmic part; GO:0044464 cell part;	GO:0003824 catalytic activity; GO:0004397 histidine ammonia-lyase activity; GO:0016829 lyase activity; GO:0016840 carbon-nitrogen lyase activity; GO:0016841 ammonia-lyase activity;	K01745	hutH, HAL; histidine ammonia-lyase [EC:4.3.1.3]	dre00340 Histidine metabolism - Danio rerio (zebrafish); dre01100 Metabolic pathways - Danio rerio (zebrafish);
F02_transcript_29532	Uncharacterized protein	1.328	Up		0.0057384	extracellular		GO:0005622 intracellular; GO:0005623 cell; GO:0005634 nucleus; GO:0005737 cytoplasm; GO:0005739 mitochondrion; GO:0005740 mitochondrial envelope; GO:0005743 mitochondrial inner membrane; GO:0005746 mitochondrial respiratory chain; GO:0005751 mitochondrial respiratory chain complex IV; GO:0016020 membrane; GO:0019866 organelle inner membrane; GO:0031090 organelle membrane; GO:0031966 mitochondrial…
F02_transcript_12702	Uncharacterized protein	1.327	Up		0.0020596	cytoplasm
F02_transcript_26289	acat1, fd16h07, fd20g06, wu:fd16h07, wu:fd20g06, zgc:86832; acetyl-CoA acetyltransferase 1 (EC:2.3.1.9); K00626 acetyl-CoA C-acetyltransferase [EC:2.3.1.9] (A)	1.326	Up	dre00071 Fatty acid degradation - Danio rerio (zebrafish); dre00072 Synthesis and degradation of ketone bodies - Danio rerio (zebrafish); dre00280 Valine, leucine and isoleucine degradation - Danio rerio (zebrafish); dre00310 Lysine degradation - Danio rerio (zebrafish); dre00380 Tryptophan metabolism - Danio rerio (zebrafish); dre00620 Pyruvate metabolism - Danio rerio (zebrafish); dre00630 Glyo…	0.026419	mitochondria	GO:0001655 urogenital system development; GO:0001656 metanephros development; GO:0001822 kidney development; GO:0001889 liver development; GO:0006082 organic acid metabolic process; GO:0006084 acetyl-CoA metabolic process; GO:0006085 acetyl-CoA biosynthetic process; GO:0006090 pyruvate metabolic process; GO:0006091 generation of precursor metabolites and energy; GO:0006139 nucleobase-containing c…	GO:0005622 intracellular; GO:0005623 cell; GO:0005737 cytoplasm; GO:0005739 mitochondrion; GO:0005759 mitochondrial matrix; GO:0005777 peroxisome; GO:0031974 membrane-enclosed lumen; GO:0042579 microbody; GO:0043226 organelle; GO:0043227 membrane-bounded organelle; GO:0043229 intracellular organelle; GO:0043231 intracellular membrane-bounded organelle; GO:0043233 organelle lumen; GO:0044422 organ…	GO:0003824 catalytic activity; GO:0003985 acetyl-CoA C-acetyltransferase activity; GO:0003988 acetyl-CoA C-acyltransferase activity; GO:0005488 binding; GO:0005515 protein binding; GO:0016407 acetyltransferase activity; GO:0016408 C-acyltransferase activity; GO:0016453 C-acetyltransferase activity; GO:0016740 transferase activity; GO:0016746 transferase activity, transferring acyl groups; GO:0016…	K00626	E2.3.1.9, atoB; acetyl-CoA C-acetyltransferase [EC:2.3.1.9]	dre00071 Fatty acid degradation - Danio rerio (zebrafish); dre00072 Synthesis and degradation of ketone bodies - Danio rerio (zebrafish); dre00280 Valine, leucine and isoleucine degradation - Danio rerio (zebrafish); dre00310 Lysine degradation - Danio rerio (zebrafish); dre00380 Tryptophan metabolism - Danio rerio (zebrafish); dre00620 Pyruvate metabolism - Danio rerio (zebrafish); dre00630 Glyo…	PF00108; PF02803	Thiolase, N-terminal domain; Thiolase, C-terminal domain
F02_transcript_4248	Fibroblast growth factor receptor 3 [Exaiptasia pallida]	1.325	Up		0.00020388	extracellular							PF12714	TILa domain
F02_transcript_25331	ctsba, ctsb, id:ibd1201, wu:fa13g05, wu:fb34e12, zgc:55862, zgc:65809, zgc:77181; cathepsin Ba (EC:3.4.22.1); K01363 cathepsin B [EC:3.4.22.1] (A)	1.325	Up	dre04140 Autophagy - animal - Danio rerio (zebrafish); dre04142 Lysosome - Danio rerio (zebrafish); dre04210 Apoptosis - Danio rerio (zebrafish); dre04621 NOD-like receptor signaling pathway - Danio rerio (zebrafish);	0.023523	nucleus	GO:0000003 reproduction; GO:0001775 cell activation; GO:0001890 placenta development; GO:0001893 maternal placenta development; GO:0002252 immune effector process; GO:0002263 cell activation involved in immune response; GO:0002274 myeloid leukocyte activation; GO:0002275 myeloid cell activation involved in immune response; GO:0002283 neutrophil activation involved in immune response; GO:0002366 l…	GO:0000323 lytic vacuole; GO:0005576 extracellular region; GO:0005615 extracellular space; GO:0005622 intracellular; GO:0005623 cell; GO:0005634 nucleus; GO:0005730 nucleolus; GO:0005737 cytoplasm; GO:0005739 mitochondrion; GO:0005764 lysosome; GO:0005768 endosome; GO:0005773 vacuole; GO:0005775 vacuolar lumen; GO:0005886 plasma membrane; GO:0009897 external side of plasma membrane; GO:0009986 ce…	GO:0003824 catalytic activity; GO:0004175 endopeptidase activity; GO:0004197 cysteine-type endopeptidase activity; GO:0004252 serine-type endopeptidase activity; GO:0005488 binding; GO:0005515 protein binding; GO:0005518 collagen binding; GO:0008233 peptidase activity; GO:0008234 cysteine-type peptidase activity; GO:0008236 serine-type peptidase activity; GO:0016787 hydrolase activity; GO:0017171…	K01363	CTSB; cathepsin B [EC:3.4.22.1]	dre04140 Autophagy - animal - Danio rerio (zebrafish); dre04142 Lysosome - Danio rerio (zebrafish); dre04210 Apoptosis - Danio rerio (zebrafish); dre04621 NOD-like receptor signaling pathway - Danio rerio (zebrafish);	PF00112	Papain family cysteine protease
F02_transcript_26914	phosphatidylethanolamine-binding protein 4 precursor [Bos taurus]	1.324	Up		0.0085386	cytoplasm,nucleus							PF01161	Phosphatidylethanolamine-binding protein
F02_transcript_8362	Papilin, partial [Stegodyphus mimosarum]	1.322	Up		0.0032186	extracellular		GO:0005576 extracellular region;		K23421			PF07502; PF00014	MANEC domain; Kunitz/Bovine pancreatic trypsin inhibitor domain
F02_transcript_1560	Transmembrane and coiled-coil domains protein 1 [Zootermopsis nevadensis]	1.322	Up		0.0122417	plasma membrane
F02_transcript_24061	lipopolysaccharide-binding protein precursor [Bos taurus]	1.319	Up		0.00034188	plasma membrane			GO:0001530 lipopolysaccharide binding; GO:0005488 binding; GO:0005543 phospholipid binding; GO:0008289 lipid binding; GO:0043167 ion binding; GO:0043168 anion binding; GO:0097367 carbohydrate derivative binding;				PF02886	LBP / BPI / CETP family, C-terminal domain
F02_transcript_7062	glycine N-methyltransferase-like; K00552 glycine N-methyltransferase [EC:2.1.1.20] (A)	1.319	Up	dre00260 Glycine, serine and threonine metabolism - Danio rerio (zebrafish); dre01100 Metabolic pathways - Danio rerio (zebrafish);	0.002064	cytoplasm	GO:0000096 sulfur amino acid metabolic process; GO:0001505 regulation of neurotransmitter levels; GO:0005975 carbohydrate metabolic process; GO:0005976 polysaccharide metabolic process; GO:0005977 glycogen metabolic process; GO:0006073 cellular glucan metabolic process; GO:0006082 organic acid metabolic process; GO:0006091 generation of precursor metabolites and energy; GO:0006109 regulation of c…	GO:0005622 intracellular; GO:0005623 cell; GO:0005634 nucleus; GO:0005737 cytoplasm; GO:0005829 cytosol; GO:0032991 macromolecular complex; GO:0034708 methyltransferase complex; GO:0043226 organelle; GO:0043227 membrane-bounded organelle; GO:0043229 intracellular organelle; GO:0043231 intracellular membrane-bounded organelle; GO:0044424 intracellular part; GO:0044444 cytoplasmic part; GO:0044464 …	GO:0003824 catalytic activity; GO:0005488 binding; GO:0005515 protein binding; GO:0005542 folic acid binding; GO:0008144 drug binding; GO:0008168 methyltransferase activity; GO:0008170 N-methyltransferase activity; GO:0008757 S-adenosylmethionine-dependent methyltransferase activity; GO:0016594 glycine binding; GO:0016597 amino acid binding; GO:0016740 transferase activity; GO:0016741 transferase…	K00552	GNMT; glycine N-methyltransferase [EC:2.1.1.20]	dre00260 Glycine, serine and threonine metabolism - Danio rerio (zebrafish); dre01100 Metabolic pathways - Danio rerio (zebrafish);	PF13847	Methyltransferase domain
F02_transcript_5542	BRISC complex subunit Abraxas 2-like [Stylophora pistillata]	1.318	Up		0.0074022	cytoplasm	GO:0000226 microtubule cytoskeleton organization; GO:0000278 mitotic cell cycle; GO:0000280 nuclear division; GO:0002931 response to ischemia; GO:0006464 cellular protein modification process; GO:0006508 proteolysis; GO:0006807 nitrogen compound metabolic process; GO:0006950 response to stress; GO:0006996 organelle organization; GO:0007010 cytoskeleton organization; GO:0007017 microtubule-based p…	GO:0005622 intracellular; GO:0005623 cell; GO:0005634 nucleus; GO:0005737 cytoplasm; GO:0005829 cytosol; GO:0032991 macromolecular complex; GO:0043226 organelle; GO:0043227 membrane-bounded organelle; GO:0043229 intracellular organelle; GO:0043231 intracellular membrane-bounded organelle; GO:0044422 organelle part; GO:0044424 intracellular part; GO:0044428 nuclear part; GO:0044444 cytoplasmic par…	GO:0005488 binding; GO:0005515 protein binding; GO:0008017 microtubule binding; GO:0008092 cytoskeletal protein binding; GO:0015631 tubulin binding; GO:0031593 polyubiquitin binding;	K20799	FAM175B, ABRO1; BRISC complex subunit Abro1
F02_transcript_87	Sterile alpha motif domain-containing protein 9-like [Stylophora pistillata]	1.315	Up		0.00165916	cytoplasm							PF07647	SAM domain (Sterile alpha motif)
F02_transcript_15352	proactivator polypeptide-like; K12382 saposin (A)	1.312	Up	dre04142 Lysosome - Danio rerio (zebrafish);	0.0028559	cytoplasm	GO:0000003 reproduction; GO:0001655 urogenital system development; GO:0001775 cell activation; GO:0001932 regulation of protein phosphorylation; GO:0001934 positive regulation of protein phosphorylation; GO:0002252 immune effector process; GO:0002263 cell activation involved in immune response; GO:0002274 myeloid leukocyte activation; GO:0002275 myeloid cell activation involved in immune response…	GO:0000323 lytic vacuole; GO:0005576 extracellular region; GO:0005615 extracellular space; GO:0005622 intracellular; GO:0005623 cell; GO:0005737 cytoplasm; GO:0005764 lysosome; GO:0005765 lysosomal membrane; GO:0005766 primary lysosome; GO:0005768 endosome; GO:0005770 late endosome; GO:0005773 vacuole; GO:0005774 vacuolar membrane; GO:0005775 vacuolar lumen; GO:0005776 autophagosome; GO:0005886 p…	GO:0001664 G-protein coupled receptor binding; GO:0003824 catalytic activity; GO:0004553 hydrolase activity, hydrolyzing O-glycosyl compounds; GO:0004565 beta-galactosidase activity; GO:0005102 receptor binding; GO:0005488 binding; GO:0005515 protein binding; GO:0005543 phospholipid binding; GO:0008047 enzyme activator activity; GO:0008289 lipid binding; GO:0015925 galactosidase activity; GO:0016…	K12382	PSAP, SGP1; saposin	dre04142 Lysosome - Danio rerio (zebrafish);	PF05184	Saposin-like type B, region 1
F02_transcript_29102	rbp4, rbp, wu:fb58d04, wu:fb72b04, zgc:86911; retinol binding protein 4, plasma; K18271 retinol-binding protein 4 (A)	1.312	Up		0.00153702	extracellular	GO:0000003 reproduction; GO:0001101 response to acid chemical; GO:0001501 skeletal system development; GO:0001523 retinoid metabolic process; GO:0001555 oocyte growth; GO:0001654 eye development; GO:0001655 urogenital system development; GO:0001894 tissue homeostasis; GO:0002637 regulation of immunoglobulin production; GO:0002639 positive regulation of immunoglobulin production; GO:0002682 regula…	GO:0005576 extracellular region; GO:0005615 extracellular space; GO:0005622 intracellular; GO:0005623 cell; GO:0005737 cytoplasm; GO:0005829 cytosol; GO:0030135 coated vesicle; GO:0030136 clathrin-coated vesicle; GO:0031410 cytoplasmic vesicle; GO:0031982 vesicle; GO:0032991 macromolecular complex; GO:0043226 organelle; GO:0043227 membrane-bounded organelle; GO:0043229 intracellular organelle; GO…	GO:0005102 receptor binding; GO:0005215 transporter activity; GO:0005319 lipid transporter activity; GO:0005488 binding; GO:0005501 retinoid binding; GO:0005515 protein binding; GO:0008289 lipid binding; GO:0015318 inorganic solute uptake transmembrane transporter activity; GO:0015665 alcohol transmembrane transporter activity; GO:0019840 isoprenoid binding; GO:0019841 retinol binding; GO:0019842…	K18271	RBP4; retinol-binding protein 4		PF00061	Lipocalin / cytosolic fatty-acid binding protein family
F02_transcript_20344	ctsc, cb912, ik:tdsubc_1h2, sb:cb146, wu:fb34g12, wu:fj58d01; cathepsin C (EC:3.4.14.1); K01275 cathepsin C [EC:3.4.14.1] (A)	1.31	Up	dre04142 Lysosome - Danio rerio (zebrafish); dre04210 Apoptosis - Danio rerio (zebrafish);	0.0035573	mitochondria	GO:0001775 cell activation; GO:0001906 cell killing; GO:0001909 leukocyte mediated cytotoxicity; GO:0001913 T cell mediated cytotoxicity; GO:0002250 adaptive immune response; GO:0002252 immune effector process; GO:0002263 cell activation involved in immune response; GO:0002274 myeloid leukocyte activation; GO:0002275 myeloid cell activation involved in immune response; GO:0002283 neutrophil activ…	GO:0000323 lytic vacuole; GO:0005576 extracellular region; GO:0005615 extracellular space; GO:0005622 intracellular; GO:0005623 cell; GO:0005634 nucleus; GO:0005654 nucleoplasm; GO:0005737 cytoplasm; GO:0005764 lysosome; GO:0005766 primary lysosome; GO:0005773 vacuole; GO:0005775 vacuolar lumen; GO:0005783 endoplasmic reticulum; GO:0005788 endoplasmic reticulum lumen; GO:0005793 endoplasmic retic…	GO:0003824 catalytic activity; GO:0004175 endopeptidase activity; GO:0004197 cysteine-type endopeptidase activity; GO:0004252 serine-type endopeptidase activity; GO:0005488 binding; GO:0005515 protein binding; GO:0008047 enzyme activator activity; GO:0008233 peptidase activity; GO:0008234 cysteine-type peptidase activity; GO:0008236 serine-type peptidase activity; GO:0016504 peptidase activator a…	K01275	CTSC; cathepsin C [EC:3.4.14.1]	dre04142 Lysosome - Danio rerio (zebrafish); dre04210 Apoptosis - Danio rerio (zebrafish);	PF08773; PF00112	Cathepsin C exclusion domain; Papain family cysteine protease
F02_transcript_6882	nuclear transcription factor Y subunit alpha-like; K08064 nuclear transcription factor Y, alpha (A)	1.308	Up		0.044239	nucleus	GO:0006139 nucleobase-containing compound metabolic process; GO:0006351 transcription, DNA-templated; GO:0006355 regulation of transcription, DNA-templated; GO:0006357 regulation of transcription from RNA polymerase II promoter; GO:0006366 transcription from RNA polymerase II promoter; GO:0006725 cellular aromatic compound metabolic process; GO:0006807 nitrogen compound metabolic process; GO:0008…	GO:0005622 intracellular; GO:0005623 cell; GO:0005634 nucleus; GO:0005654 nucleoplasm; GO:0005667 transcription factor complex; GO:0016602 CCAAT-binding factor complex; GO:0031974 membrane-enclosed lumen; GO:0031981 nuclear lumen; GO:0032991 macromolecular complex; GO:0032993 protein-DNA complex; GO:0043226 organelle; GO:0043227 membrane-bounded organelle; GO:0043229 intracellular organelle; GO:0…	GO:0000976 transcription regulatory region sequence-specific DNA binding; GO:0000977 RNA polymerase II regulatory region sequence-specific DNA binding; GO:0000978 RNA polymerase II core promoter proximal region sequence-specific DNA binding; GO:0000981 RNA polymerase II transcription factor activity, sequence-specific DNA binding; GO:0000982 transcription factor activity, RNA polymerase II core p…	K08064	NFYA; nuclear transcription factor Y, alpha
F02_transcript_21548	histone H1t [Homo sapiens]	1.307	Up		4.157e-05	nucleus				K11275	H1_5; histone H1/5		PF00538	linker histone H1 and H5 family
F02_transcript_2536	4-aminobutyrate aminotransferase, mitochondrial-like; K13524 4-aminobutyrate aminotransferase / (S)-3-amino-2-methylpropionate transaminase [EC:2.6.1.19 2.6.1.22] (A)	1.307	Up	dre00250 Alanine, aspartate and glutamate metabolism - Danio rerio (zebrafish); dre00280 Valine, leucine and isoleucine degradation - Danio rerio (zebrafish); dre00410 beta-Alanine metabolism - Danio rerio (zebrafish); dre00640 Propanoate metabolism - Danio rerio (zebrafish); dre00650 Butanoate metabolism - Danio rerio (zebrafish); dre01100 Metabolic pathways - Danio rerio (zebrafish);	0.00030487	cytoplasm	GO:0000003 reproduction; GO:0000820 regulation of glutamine family amino acid metabolic process; GO:0001505 regulation of neurotransmitter levels; GO:0001666 response to hypoxia; GO:0002791 regulation of peptide secretion; GO:0002793 positive regulation of peptide secretion; GO:0003008 system process; GO:0003013 circulatory system process; GO:0006082 organic acid metabolic process; GO:0006109 reg…	GO:0005622 intracellular; GO:0005623 cell; GO:0005737 cytoplasm; GO:0005739 mitochondrion; GO:0005759 mitochondrial matrix; GO:0005829 cytosol; GO:0031974 membrane-enclosed lumen; GO:0032144 4-aminobutyrate transaminase complex; GO:0032991 macromolecular complex; GO:0042995 cell projection; GO:0043005 neuron projection; GO:0043226 organelle; GO:0043227 membrane-bounded organelle; GO:0043229 intra…	GO:0003824 catalytic activity; GO:0003867 4-aminobutyrate transaminase activity; GO:0005488 binding; GO:0005515 protein binding; GO:0008144 drug binding; GO:0008483 transaminase activity; GO:0016740 transferase activity; GO:0016769 transferase activity, transferring nitrogenous groups; GO:0019842 vitamin binding; GO:0019899 enzyme binding; GO:0030170 pyridoxal phosphate binding; GO:0032145 succin…	K13524	ABAT; 4-aminobutyrate aminotransferase / (S)-3-amino-2-methylpropionate transaminase [EC:2.6.1.19 2.6.1.22]	dre00250 Alanine, aspartate and glutamate metabolism - Danio rerio (zebrafish); dre00280 Valine, leucine and isoleucine degradation - Danio rerio (zebrafish); dre00410 beta-Alanine metabolism - Danio rerio (zebrafish); dre00640 Propanoate metabolism - Danio rerio (zebrafish); dre00650 Butanoate metabolism - Danio rerio (zebrafish); dre01100 Metabolic pathways - Danio rerio (zebrafish);	PF00202	Aminotransferase class-III
F02_transcript_8010	STAT1; signal transducer and activator of transcription 1, 91kDa; K11220 signal transducer and activator of transcription 1 (A)	1.305	Up	dre04217 Necroptosis - Danio rerio (zebrafish); dre04620 Toll-like receptor signaling pathway - Danio rerio (zebrafish); dre04621 NOD-like receptor signaling pathway - Danio rerio (zebrafish); dre04625 C-type lectin receptor signaling pathway - Danio rerio (zebrafish); dre04933 AGE-RAGE signaling pathway in diabetic complications - Danio rerio (zebrafish); dre05168 Herpes simplex virus 1 infectio…	0.00068107	nucleus	GO:0000122 negative regulation of transcription from RNA polymerase II promoter; GO:0001655 urogenital system development; GO:0001656 metanephros development; GO:0001817 regulation of cytokine production; GO:0001819 positive regulation of cytokine production; GO:0001822 kidney development; GO:0001936 regulation of endothelial cell proliferation; GO:0001937 negative regulation of endothelial cell …	GO:0000228 nuclear chromosome; GO:0000785 chromatin; GO:0000790 nuclear chromatin; GO:0005622 intracellular; GO:0005623 cell; GO:0005634 nucleus; GO:0005654 nucleoplasm; GO:0005694 chromosome; GO:0005730 nucleolus; GO:0005737 cytoplasm; GO:0005829 cytosol; GO:0030424 axon; GO:0030425 dendrite; GO:0031974 membrane-enclosed lumen; GO:0031981 nuclear lumen; GO:0032991 macromolecular complex; GO:0036…	GO:0000976 transcription regulatory region sequence-specific DNA binding; GO:0000977 RNA polymerase II regulatory region sequence-specific DNA binding; GO:0000978 RNA polymerase II core promoter proximal region sequence-specific DNA binding; GO:0000979 RNA polymerase II core promoter sequence-specific DNA binding; GO:0000981 RNA polymerase II transcription factor activity, sequence-specific DNA b…	K11220	STAT1; signal transducer and activator of transcription 1	dre04217 Necroptosis - Danio rerio (zebrafish); dre04620 Toll-like receptor signaling pathway - Danio rerio (zebrafish); dre04621 NOD-like receptor signaling pathway - Danio rerio (zebrafish); dre04625 C-type lectin receptor signaling pathway - Danio rerio (zebrafish); dre04933 AGE-RAGE signaling pathway in diabetic complications - Danio rerio (zebrafish); dre05168 Herpes simplex virus 1 infectio…	PF02865; PF02864; PF00017	STAT protein, protein interaction domain; STAT protein, DNA binding domain; SH2 domain
F02_transcript_654	Uncharacterized protein	1.304	Up		0.0150787	cytoplasm				K19016	IMPG1, SPACR; interphotoreceptor matrix proteoglycan 1
F02_transcript_20205	inosine-5'-monophosphate dehydrogenase 1-like; K00088 IMP dehydrogenase [EC:1.1.1.205] (A)	1.303	Up	dre00230 Purine metabolism - Danio rerio (zebrafish); dre00983 Drug metabolism - other enzymes - Danio rerio (zebrafish); dre01100 Metabolic pathways - Danio rerio (zebrafish);	0.00049798	cytoplasm	GO:0000902 cell morphogenesis; GO:0000904 cell morphogenesis involved in differentiation; GO:0001654 eye development; GO:0001775 cell activation; GO:0002252 immune effector process; GO:0002263 cell activation involved in immune response; GO:0002274 myeloid leukocyte activation; GO:0002275 myeloid cell activation involved in immune response; GO:0002283 neutrophil activation involved in immune resp…	GO:0000323 lytic vacuole; GO:0005576 extracellular region; GO:0005622 intracellular; GO:0005623 cell; GO:0005634 nucleus; GO:0005737 cytoplasm; GO:0005764 lysosome; GO:0005766 primary lysosome; GO:0005773 vacuole; GO:0005775 vacuolar lumen; GO:0005829 cytosol; GO:0012505 endomembrane system; GO:0030141 secretory granule; GO:0031410 cytoplasmic vesicle; GO:0031974 membrane-enclosed lumen; GO:00319…	GO:0003676 nucleic acid binding; GO:0003677 DNA binding; GO:0003824 catalytic activity; GO:0003938 IMP dehydrogenase activity; GO:0005488 binding; GO:0016491 oxidoreductase activity; GO:0016614 oxidoreductase activity, acting on CH-OH group of donors; GO:0016616 oxidoreductase activity, acting on the CH-OH group of donors, NAD or NADP as acceptor; GO:0097159 organic cyclic compound binding; GO:19…	K00088	IMPDH, guaB; IMP dehydrogenase [EC:1.1.1.205]	dre00230 Purine metabolism - Danio rerio (zebrafish); dre00983 Drug metabolism - other enzymes - Danio rerio (zebrafish); dre01100 Metabolic pathways - Danio rerio (zebrafish);	PF00478	IMP dehydrogenase / GMP reductase domain
F02_transcript_29509	fibropellin-1-like [Acanthaster planci]	1.303	Up	dre04145 Phagosome - Danio rerio (zebrafish);	0.0012793	extracellular				K06560	MRC, CD206, CD280; mannose receptor, C type	dre04145 Phagosome - Danio rerio (zebrafish);	PF00059	Lectin C-type domain
F02_transcript_25932	fructose-bisphosphate aldolase B-like; K01623 fructose-bisphosphate aldolase, class I [EC:4.1.2.13] (A)	1.302	Up	dre00010 Glycolysis / Gluconeogenesis - Danio rerio (zebrafish); dre00030 Pentose phosphate pathway - Danio rerio (zebrafish); dre00051 Fructose and mannose metabolism - Danio rerio (zebrafish); dre01100 Metabolic pathways - Danio rerio (zebrafish); dre01200 Carbon metabolism - Danio rerio (zebrafish); dre01230 Biosynthesis of amino acids - Danio rerio (zebrafish);	8.4376e-05	cytoplasm	GO:0001101 response to acid chemical; GO:0001889 liver development; GO:0005975 carbohydrate metabolic process; GO:0005996 monosaccharide metabolic process; GO:0006000 fructose metabolic process; GO:0006001 fructose catabolic process; GO:0006006 glucose metabolic process; GO:0006007 glucose catabolic process; GO:0006081 cellular aldehyde metabolic process; GO:0006082 organic acid metabolic process…	GO:0000323 lytic vacuole; GO:0005576 extracellular region; GO:0005615 extracellular space; GO:0005622 intracellular; GO:0005623 cell; GO:0005634 nucleus; GO:0005737 cytoplasm; GO:0005764 lysosome; GO:0005773 vacuole; GO:0005783 endoplasmic reticulum; GO:0005789 endoplasmic reticulum membrane; GO:0005790 smooth endoplasmic reticulum; GO:0005791 rough endoplasmic reticulum; GO:0005813 centrosome; G…	GO:0003824 catalytic activity; GO:0004332 fructose-bisphosphate aldolase activity; GO:0005488 binding; GO:0005515 protein binding; GO:0005543 phospholipid binding; GO:0008092 cytoskeletal protein binding; GO:0008289 lipid binding; GO:0016829 lyase activity; GO:0016830 carbon-carbon lyase activity; GO:0016832 aldehyde-lyase activity; GO:0019899 enzyme binding; GO:0030246 carbohydrate binding; GO:0…	K01623	ALDO; fructose-bisphosphate aldolase, class I [EC:4.1.2.13]	dre00010 Glycolysis / Gluconeogenesis - Danio rerio (zebrafish); dre00030 Pentose phosphate pathway - Danio rerio (zebrafish); dre00051 Fructose and mannose metabolism - Danio rerio (zebrafish); dre01100 Metabolic pathways - Danio rerio (zebrafish); dre01200 Carbon metabolism - Danio rerio (zebrafish); dre01230 Biosynthesis of amino acids - Danio rerio (zebrafish);	PF00274	Fructose-bisphosphate aldolase class-I
F02_transcript_29050	Uncharacterized protein	1.301	Up		0.0111585	extracellular
F02_transcript_1175	gelsolin-like; K05768 gelsolin (A)	0.768	Down	dre04810 Regulation of actin cytoskeleton - Danio rerio (zebrafish);	0.0087046	cytoplasm,nucleus	GO:0001101 response to acid chemical; GO:0001775 cell activation; GO:0002252 immune effector process; GO:0002263 cell activation involved in immune response; GO:0002274 myeloid leukocyte activation; GO:0002275 myeloid cell activation involved in immune response; GO:0002283 neutrophil activation involved in immune response; GO:0002366 leukocyte activation involved in immune response; GO:0002376 im…	GO:0001726 ruffle; GO:0002102 podosome; GO:0005576 extracellular region; GO:0005615 extracellular space; GO:0005622 intracellular; GO:0005623 cell; GO:0005737 cytoplasm; GO:0005829 cytosol; GO:0005856 cytoskeleton; GO:0005886 plasma membrane; GO:0005938 cell cortex; GO:0012505 endomembrane system; GO:0015629 actin cytoskeleton; GO:0016020 membrane; GO:0016528 sarcoplasm; GO:0030027 lamellipodium;…	GO:0003779 actin binding; GO:0005488 binding; GO:0005509 calcium ion binding; GO:0005515 protein binding; GO:0008092 cytoskeletal protein binding; GO:0017022 myosin binding; GO:0043167 ion binding; GO:0043169 cation binding; GO:0045159 myosin II binding; GO:0046872 metal ion binding;	K05768	GSN; gelsolin	dre04810 Regulation of actin cytoskeleton - Danio rerio (zebrafish);	PF00626	Gelsolin repeat
F02_transcript_1706	desmoglein-2-like; K07597 desmoglein 2 (A)	0.767	Down		7.8735e-05	endoplasmic reticulum	GO:0001775 cell activation; GO:0001942 hair follicle development; GO:0002027 regulation of heart rate; GO:0002252 immune effector process; GO:0002263 cell activation involved in immune response; GO:0002274 myeloid leukocyte activation; GO:0002275 myeloid cell activation involved in immune response; GO:0002283 neutrophil activation involved in immune response; GO:0002366 leukocyte activation invol…	GO:0001533 cornified envelope; GO:0005622 intracellular; GO:0005623 cell; GO:0005737 cytoplasm; GO:0005829 cytosol; GO:0005886 plasma membrane; GO:0005911 cell-cell junction; GO:0009898 cytoplasmic side of plasma membrane; GO:0012505 endomembrane system; GO:0012506 vesicle membrane; GO:0014704 intercalated disc; GO:0016020 membrane; GO:0016324 apical plasma membrane; GO:0016328 lateral plasma mem…	GO:0005488 binding; GO:0005509 calcium ion binding; GO:0005515 protein binding; GO:0015643 toxic substance binding; GO:0043167 ion binding; GO:0043169 cation binding; GO:0045295 gamma-catenin binding; GO:0046872 metal ion binding; GO:0050839 cell adhesion molecule binding; GO:0086080 protein binding involved in heterotypic cell-cell adhesion; GO:0086083 cell adhesive protein binding involved in b…				PF00028	Cadherin domain
F02_transcript_19511	glutamine synthetase-like; K01915 glutamine synthetase [EC:6.3.1.2] (A)	0.765	Down	dre00220 Arginine biosynthesis - Danio rerio (zebrafish); dre00250 Alanine, aspartate and glutamate metabolism - Danio rerio (zebrafish); dre00630 Glyoxylate and dicarboxylate metabolism - Danio rerio (zebrafish); dre00910 Nitrogen metabolism - Danio rerio (zebrafish); dre01100 Metabolic pathways - Danio rerio (zebrafish); dre01230 Biosynthesis of amino acids - Danio rerio (zebrafish); dre04217 N…	0.0036796	cytoplasm				K01915	glnA, GLUL; glutamine synthetase [EC:6.3.1.2]	dre00220 Arginine biosynthesis - Danio rerio (zebrafish); dre00250 Alanine, aspartate and glutamate metabolism - Danio rerio (zebrafish); dre00630 Glyoxylate and dicarboxylate metabolism - Danio rerio (zebrafish); dre00910 Nitrogen metabolism - Danio rerio (zebrafish); dre01100 Metabolic pathways - Danio rerio (zebrafish); dre01230 Biosynthesis of amino acids - Danio rerio (zebrafish); dre04217 N…	PF03951; PF00120	Glutamine synthetase, beta-Grasp domain; Glutamine synthetase, catalytic domain
F02_transcript_7859	c-1-tetrahydrofolate synthase, cytoplasmic-like; K00288 methylenetetrahydrofolate dehydrogenase (NADP+) / methenyltetrahydrofolate cyclohydrolase / formyltetrahydrofolate synthetase [EC:1.5.1.5 3.5.4.9 6.3.4.3] (A)	0.765	Down	dre00670 One carbon pool by folate - Danio rerio (zebrafish); dre01100 Metabolic pathways - Danio rerio (zebrafish);	0.0094153	cytoplasm	GO:0000096 sulfur amino acid metabolic process; GO:0000097 sulfur amino acid biosynthetic process; GO:0001501 skeletal system development; GO:0001776 leukocyte homeostasis; GO:0001780 neutrophil homeostasis; GO:0001838 embryonic epithelial tube formation; GO:0001841 neural tube formation; GO:0001843 neural tube closure; GO:0002009 morphogenesis of an epithelium; GO:0002262 myeloid cell homeostasi…	GO:0005622 intracellular; GO:0005623 cell; GO:0005737 cytoplasm; GO:0005739 mitochondrion; GO:0005829 cytosol; GO:0043226 organelle; GO:0043227 membrane-bounded organelle; GO:0043229 intracellular organelle; GO:0043231 intracellular membrane-bounded organelle; GO:0044424 intracellular part; GO:0044444 cytoplasmic part; GO:0044464 cell part;	GO:0003824 catalytic activity; GO:0004329 formate-tetrahydrofolate ligase activity; GO:0004477 methenyltetrahydrofolate cyclohydrolase activity; GO:0004486 methylenetetrahydrofolate dehydrogenase [NAD(P)+] activity; GO:0004487 methylenetetrahydrofolate dehydrogenase (NAD+) activity; GO:0004488 methylenetetrahydrofolate dehydrogenase (NADP+) activity; GO:0016491 oxidoreductase activity; GO:0016645…	K00288	MTHFD; methylenetetrahydrofolate dehydrogenase (NADP+) / methenyltetrahydrofolate cyclohydrolase / formyltetrahydrofolate synthetase [EC:1.5.1.5 3.5.4.9 6.3.4.3]	dre00670 One carbon pool by folate - Danio rerio (zebrafish); dre01100 Metabolic pathways - Danio rerio (zebrafish);	PF00763; PF02882	Tetrahydrofolate dehydrogenase/cyclohydrolase, catalytic domain; Tetrahydrofolate dehydrogenase/cyclohydrolase, NAD(P)-binding domain
F02_transcript_18053	anxa2a, anx2a, anxa2, wu:fc87g06; annexin A2a; K17092 annexin A2 (A)	0.764	Down		4.3634e-05	cytoplasm	GO:0001501 skeletal system development; GO:0001503 ossification; GO:0001525 angiogenesis; GO:0001568 blood vessel development; GO:0001765 membrane raft assembly; GO:0001775 cell activation; GO:0001816 cytokine production; GO:0001919 regulation of receptor recycling; GO:0001921 positive regulation of receptor recycling; GO:0001932 regulation of protein phosphorylation; GO:0001934 positive regulati…	GO:0000323 lytic vacuole; GO:0001726 ruffle; GO:0005576 extracellular region; GO:0005604 basement membrane; GO:0005615 extracellular space; GO:0005622 intracellular; GO:0005623 cell; GO:0005634 nucleus; GO:0005737 cytoplasm; GO:0005764 lysosome; GO:0005765 lysosomal membrane; GO:0005766 primary lysosome; GO:0005768 endosome; GO:0005769 early endosome; GO:0005770 late endosome; GO:0005773 vacuole;…	GO:0001786 phosphatidylserine binding; GO:0002020 protease binding; GO:0003779 actin binding; GO:0004857 enzyme inhibitor activity; GO:0004859 phospholipase inhibitor activity; GO:0005215 transporter activity; GO:0005216 ion channel activity; GO:0005244 voltage-gated ion channel activity; GO:0005245 voltage-gated calcium channel activity; GO:0005261 cation channel activity; GO:0005262 calcium cha…	K17092	ANXA2; annexin A2
F02_transcript_29236	translocon-associated protein subunit gamma-like; K13251 translocon-associated protein subunit gamma (A)	0.763	Down	dre04141 Protein processing in endoplasmic reticulum - Danio rerio (zebrafish);	0.00094403	plasma membrane		GO:0005622 intracellular; GO:0005623 cell; GO:0005737 cytoplasm; GO:0005783 endoplasmic reticulum; GO:0005789 endoplasmic reticulum membrane; GO:0012505 endomembrane system; GO:0016020 membrane; GO:0031984 organelle subcompartment; GO:0042175 nuclear outer membrane-endoplasmic reticulum membrane network; GO:0043226 organelle; GO:0043227 membrane-bounded organelle; GO:0043229 intracellular organel…		K13251	SSR3; translocon-associated protein subunit gamma	dre04141 Protein processing in endoplasmic reticulum - Danio rerio (zebrafish);
F02_transcript_1709	Ubiquitin-conjugating enzyme E2-17 kDa [Zootermopsis nevadensis]	0.763	Down	dre04120 Ubiquitin mediated proteolysis - Danio rerio (zebrafish);	0.021417	cytoplasm				K20217	UBE2E; ubiquitin-conjugating enzyme E2 E [EC:2.3.2.23]	dre04120 Ubiquitin mediated proteolysis - Danio rerio (zebrafish);	PF13519; PF00179; PF04564	von Willebrand factor type A domain; Ubiquitin-conjugating enzyme; U-box domain
F02_transcript_23509	rab25b, zgc:112037; RAB25, member RAS oncogene family b; K07906 Ras-related protein Rab-25 (A)	0.762	Down		5.633e-05	cytoplasm	GO:0000902 cell morphogenesis; GO:0000904 cell morphogenesis involved in differentiation; GO:0002064 epithelial cell development; GO:0003382 epithelial cell morphogenesis; GO:0008284 positive regulation of cell proliferation; GO:0009653 anatomical structure morphogenesis; GO:0009888 tissue development; GO:0009987 cellular process; GO:0010632 regulation of epithelial cell migration; GO:0010634 pos…	GO:0005622 intracellular; GO:0005623 cell; GO:0005737 cytoplasm; GO:0031143 pseudopodium; GO:0031410 cytoplasmic vesicle; GO:0031982 vesicle; GO:0042995 cell projection; GO:0043226 organelle; GO:0043227 membrane-bounded organelle; GO:0043229 intracellular organelle; GO:0044424 intracellular part; GO:0044444 cytoplasmic part; GO:0044464 cell part; GO:0097708 intracellular vesicle;	GO:0005488 binding; GO:0005515 protein binding; GO:0008092 cytoskeletal protein binding; GO:0017022 myosin binding; GO:0031489 myosin V binding;	K07906	RAB25; Ras-related protein Rab-25		PF00071	Ras family
F02_transcript_1569	plakophilin-1-like; K10387 plakophilin 1 (A)	0.759	Down		0.023723	nucleus	GO:0001775 cell activation; GO:0002252 immune effector process; GO:0002263 cell activation involved in immune response; GO:0002274 myeloid leukocyte activation; GO:0002275 myeloid cell activation involved in immune response; GO:0002283 neutrophil activation involved in immune response; GO:0002366 leukocyte activation involved in immune response; GO:0002376 immune system process; GO:0002443 leukoc…	GO:0001533 cornified envelope; GO:0005622 intracellular; GO:0005623 cell; GO:0005634 nucleus; GO:0005654 nucleoplasm; GO:0005737 cytoplasm; GO:0005856 cytoskeleton; GO:0005882 intermediate filament; GO:0005886 plasma membrane; GO:0005911 cell-cell junction; GO:0012505 endomembrane system; GO:0012506 vesicle membrane; GO:0016020 membrane; GO:0030054 cell junction; GO:0030057 desmosome; GO:0030141 …	GO:0005198 structural molecule activity; GO:0005488 binding; GO:0005515 protein binding; GO:0005521 lamin binding; GO:0019215 intermediate filament binding; GO:0030280 structural constituent of epidermis; GO:0044877 macromolecular complex binding;	K10387	PKP1; plakophilin 1
F02_transcript_23496	caveolin-1-like; K06278 caveolin 1 (A)	0.758	Down	dre04144 Endocytosis - Danio rerio (zebrafish); dre04510 Focal adhesion - Danio rerio (zebrafish);	0.0061574	cytoplasm	GO:0000122 negative regulation of transcription from RNA polymerase II promoter; GO:0000188 inactivation of MAPK activity; GO:0000226 microtubule cytoskeleton organization; GO:0001505 regulation of neurotransmitter levels; GO:0001525 angiogenesis; GO:0001568 blood vessel development; GO:0001570 vasculogenesis; GO:0001666 response to hypoxia; GO:0001765 membrane raft assembly; GO:0001932 regulatio…	GO:0000139 Golgi membrane; GO:0001669 acrosomal vesicle; GO:0002080 acrosomal membrane; GO:0005622 intracellular; GO:0005623 cell; GO:0005737 cytoplasm; GO:0005739 mitochondrion; GO:0005768 endosome; GO:0005769 early endosome; GO:0005777 peroxisome; GO:0005778 peroxisomal membrane; GO:0005783 endoplasmic reticulum; GO:0005789 endoplasmic reticulum membrane; GO:0005794 Golgi apparatus; GO:0005811 …	GO:0000149 SNARE binding; GO:0001664 G-protein coupled receptor binding; GO:0005102 receptor binding; GO:0005113 patched binding; GO:0005198 structural molecule activity; GO:0005488 binding; GO:0005496 steroid binding; GO:0005515 protein binding; GO:0008047 enzyme activator activity; GO:0008200 ion channel inhibitor activity; GO:0008289 lipid binding; GO:0015459 potassium channel regulator activi…	K06278	CAV1; caveolin 1	dre04144 Endocytosis - Danio rerio (zebrafish); dre04510 Focal adhesion - Danio rerio (zebrafish);
F02_transcript_30032	Uncharacterized protein	0.757	Down		0.040961	cytoplasm	GO:0000003 reproduction; GO:0000768 syncytium formation by plasma membrane fusion; GO:0001666 response to hypoxia; GO:0001774 microglial cell activation; GO:0001775 cell activation; GO:0001816 cytokine production; GO:0001817 regulation of cytokine production; GO:0001818 negative regulation of cytokine production; GO:0001819 positive regulation of cytokine production; GO:0001959 regulation of cyto…	GO:0005576 extracellular region; GO:0005622 intracellular; GO:0005623 cell; GO:0005634 nucleus; GO:0005737 cytoplasm; GO:0005739 mitochondrion; GO:0005783 endoplasmic reticulum; GO:0005829 cytosol; GO:0005886 plasma membrane; GO:0012505 endomembrane system; GO:0016020 membrane; GO:0032991 macromolecular complex; GO:0036477 somatodendritic compartment; GO:0042995 cell projection; GO:0043005 neuron…	GO:0002020 protease binding; GO:0003824 catalytic activity; GO:0004175 endopeptidase activity; GO:0004197 cysteine-type endopeptidase activity; GO:0004857 enzyme inhibitor activity; GO:0004866 endopeptidase inhibitor activity; GO:0004869 cysteine-type endopeptidase inhibitor activity; GO:0005488 binding; GO:0005515 protein binding; GO:0008047 enzyme activator activity; GO:0008233 peptidase activi…				PF00619	Caspase recruitment domain
F02_transcript_17863	sodium/potassium-transporting ATPase subunit beta-233-like; K01540 sodium/potassium-transporting ATPase subunit beta (A)	0.755	Down	dre04260 Cardiac muscle contraction - Danio rerio (zebrafish); dre04261 Adrenergic signaling in cardiomyocytes - Danio rerio (zebrafish);	0.0035176	plasma membrane	GO:0001508 action potential; GO:0001666 response to hypoxia; GO:0002028 regulation of sodium ion transport; GO:0002376 immune system process; GO:0003008 system process; GO:0003012 muscle system process; GO:0003013 circulatory system process; GO:0003015 heart process; GO:0006139 nucleobase-containing compound metabolic process; GO:0006163 purine nucleotide metabolic process; GO:0006725 cellular ar…	GO:0005623 cell; GO:0005886 plasma membrane; GO:0005887 integral component of plasma membrane; GO:0005890 sodium:potassium-exchanging ATPase complex; GO:0005901 caveola; GO:0005911 cell-cell junction; GO:0014704 intercalated disc; GO:0016020 membrane; GO:0016021 integral component of membrane; GO:0016323 basolateral plasma membrane; GO:0016324 apical plasma membrane; GO:0030054 cell junction; GO:…	GO:0001671 ATPase activator activity; GO:0003824 catalytic activity; GO:0005215 transporter activity; GO:0005391 sodium:potassium-exchanging ATPase activity; GO:0005488 binding; GO:0005515 protein binding; GO:0008022 protein C-terminus binding; GO:0008047 enzyme activator activity; GO:0008324 cation transmembrane transporter activity; GO:0008556 potassium-transporting ATPase activity; GO:0015075 …	K01540	ATP1B, CD298; sodium/potassium-transporting ATPase subunit beta	dre04260 Cardiac muscle contraction - Danio rerio (zebrafish); dre04261 Adrenergic signaling in cardiomyocytes - Danio rerio (zebrafish);
F02_transcript_23804	leukocyte elastase inhibitor-like; K13963 serpin B (A)	0.753	Down		0.024963	cytoplasm	GO:0001775 cell activation; GO:0002252 immune effector process; GO:0002263 cell activation involved in immune response; GO:0002274 myeloid leukocyte activation; GO:0002275 myeloid cell activation involved in immune response; GO:0002283 neutrophil activation involved in immune response; GO:0002366 leukocyte activation involved in immune response; GO:0002376 immune system process; GO:0002443 leukoc…	GO:0005576 extracellular region; GO:0005615 extracellular space; GO:0005622 intracellular; GO:0005623 cell; GO:0005737 cytoplasm; GO:0012505 endomembrane system; GO:0030141 secretory granule; GO:0031410 cytoplasmic vesicle; GO:0031974 membrane-enclosed lumen; GO:0031982 vesicle; GO:0031983 vesicle lumen; GO:0034774 secretory granule lumen; GO:0043226 organelle; GO:0043227 membrane-bounded organel…	GO:0004857 enzyme inhibitor activity; GO:0004866 endopeptidase inhibitor activity; GO:0004867 serine-type endopeptidase inhibitor activity; GO:0030234 enzyme regulator activity; GO:0030414 peptidase inhibitor activity; GO:0061134 peptidase regulator activity; GO:0061135 endopeptidase regulator activity; GO:0098772 molecular function regulator;	K23425			PF00079	Serpin (serine protease inhibitor)
F02_transcript_28512	Uncharacterized protein	0.75	Down		0.0059612	extracellular	GO:0001936 regulation of endothelial cell proliferation; GO:0001938 positive regulation of endothelial cell proliferation; GO:0001959 regulation of cytokine-mediated signaling pathway; GO:0001960 negative regulation of cytokine-mediated signaling pathway; GO:0002576 platelet degranulation; GO:0002682 regulation of immune system process; GO:0002685 regulation of leukocyte migration; GO:0002828 reg…	GO:0005576 extracellular region; GO:0005615 extracellular space; GO:0005622 intracellular; GO:0005623 cell; GO:0005737 cytoplasm; GO:0012505 endomembrane system; GO:0030141 secretory granule; GO:0031012 extracellular matrix; GO:0031089 platelet dense granule lumen; GO:0031410 cytoplasmic vesicle; GO:0031974 membrane-enclosed lumen; GO:0031982 vesicle; GO:0031983 vesicle lumen; GO:0034774 secretor…	GO:0002020 protease binding; GO:0005102 receptor binding; GO:0005126 cytokine receptor binding; GO:0005134 interleukin-2 receptor binding; GO:0005488 binding; GO:0005515 protein binding; GO:0008022 protein C-terminus binding; GO:0019899 enzyme binding; GO:0043236 laminin binding; GO:0050840 extracellular matrix binding; GO:0070851 growth factor receptor binding;
F02_transcript_24041	claudin-7-A-like; K06087 claudin (A)	0.745	Down	dre04514 Cell adhesion molecules (CAMs) - Danio rerio (zebrafish); dre04530 Tight junction - Danio rerio (zebrafish);	0.02676	plasma membrane	GO:0007155 cell adhesion; GO:0007162 negative regulation of cell adhesion; GO:0008284 positive regulation of cell proliferation; GO:0009636 response to toxic substance; GO:0010033 response to organic substance; GO:0010941 regulation of cell death; GO:0016338 calcium-independent cell-cell adhesion via plasma membrane cell-adhesion molecules; GO:0022610 biological adhesion; GO:0030155 regulation of…	GO:0005623 cell; GO:0005886 plasma membrane; GO:0005911 cell-cell junction; GO:0005923 bicellular tight junction; GO:0016020 membrane; GO:0016021 integral component of membrane; GO:0016323 basolateral plasma membrane; GO:0016327 apicolateral plasma membrane; GO:0016328 lateral plasma membrane; GO:0030054 cell junction; GO:0031224 intrinsic component of membrane; GO:0043296 apical junction complex…	GO:0005488 binding; GO:0005515 protein binding; GO:0042802 identical protein binding; GO:0050839 cell adhesion molecule binding;	K06087	CLDN; claudin	dre04514 Cell adhesion molecules (CAMs) - Danio rerio (zebrafish); dre04530 Tight junction - Danio rerio (zebrafish);
F02_transcript_13405	finTRIM family, member 82 [Danio rerio]	0.744	Down		0.0105165	nucleus							PF13445; PF00643	RING-type zinc-finger, LisH dimerisation motif; B-box zinc finger
F02_transcript_18009	dehydrogenase/reductase SDR family member 4-like; K11147 dehydrogenase/reductase SDR family member 4 [EC:1.1.-.-] (A)	0.744	Down	dre00830 Retinol metabolism - Danio rerio (zebrafish); dre01100 Metabolic pathways - Danio rerio (zebrafish); dre04146 Peroxisome - Danio rerio (zebrafish);	0.031737	mitochondria	GO:0001523 retinoid metabolic process; GO:0006066 alcohol metabolic process; GO:0006081 cellular aldehyde metabolic process; GO:0006605 protein targeting; GO:0006625 protein targeting to peroxisome; GO:0006629 lipid metabolic process; GO:0006720 isoprenoid metabolic process; GO:0006721 terpenoid metabolic process; GO:0006810 transport; GO:0006886 intracellular protein transport; GO:0006996 organe…	GO:0005622 intracellular; GO:0005623 cell; GO:0005634 nucleus; GO:0005737 cytoplasm; GO:0005739 mitochondrion; GO:0005777 peroxisome; GO:0005778 peroxisomal membrane; GO:0005782 peroxisomal matrix; GO:0005783 endoplasmic reticulum; GO:0005789 endoplasmic reticulum membrane; GO:0005829 cytosol; GO:0012505 endomembrane system; GO:0016020 membrane; GO:0031090 organelle membrane; GO:0031903 microbody…	GO:0000253 3-keto sterol reductase activity; GO:0001758 retinal dehydrogenase activity; GO:0003824 catalytic activity; GO:0004033 aldo-keto reductase (NADP) activity; GO:0004090 carbonyl reductase (NADPH) activity; GO:0005102 receptor binding; GO:0005488 binding; GO:0005515 protein binding; GO:0008106 alcohol dehydrogenase (NADP+) activity; GO:0016491 oxidoreductase activity; GO:0016614 oxidoredu…	K11147	DHRS4; dehydrogenase/reductase SDR family member 4 [EC:1.1.-.-]	dre00830 Retinol metabolism - Danio rerio (zebrafish); dre01100 Metabolic pathways - Danio rerio (zebrafish); dre04146 Peroxisome - Danio rerio (zebrafish);	PF13561	Enoyl-(Acyl carrier protein) reductase
F02_transcript_27292	impa1, zgc:100926; inositol(myo)-1(or 4)-monophosphatase 1 (EC:3.1.3.25); K01092 myo-inositol-1(or 4)-monophosphatase [EC:3.1.3.25] (A)	0.743	Down	dre00562 Inositol phosphate metabolism - Danio rerio (zebrafish); dre01100 Metabolic pathways - Danio rerio (zebrafish); dre04070 Phosphatidylinositol signaling system - Danio rerio (zebrafish);	0.025337	cytoplasm	GO:0005975 carbohydrate metabolic process; GO:0006020 inositol metabolic process; GO:0006066 alcohol metabolic process; GO:0006629 lipid metabolic process; GO:0006644 phospholipid metabolic process; GO:0006650 glycerophospholipid metabolic process; GO:0006661 phosphatidylinositol biosynthetic process; GO:0006793 phosphorus metabolic process; GO:0006796 phosphate-containing compound metabolic proc…	GO:0005622 intracellular; GO:0005623 cell; GO:0005737 cytoplasm; GO:0005829 cytosol; GO:0030424 axon; GO:0036477 somatodendritic compartment; GO:0042995 cell projection; GO:0043005 neuron projection; GO:0043025 neuronal cell body; GO:0044297 cell body; GO:0044424 intracellular part; GO:0044444 cytoplasmic part; GO:0044464 cell part; GO:0097458 neuron part;	GO:0000287 magnesium ion binding; GO:0003824 catalytic activity; GO:0005488 binding; GO:0005515 protein binding; GO:0008934 inositol monophosphate 1-phosphatase activity; GO:0016787 hydrolase activity; GO:0016788 hydrolase activity, acting on ester bonds; GO:0016791 phosphatase activity; GO:0030145 manganese ion binding; GO:0031403 lithium ion binding; GO:0031420 alkali metal ion binding; GO:0042…	K01092	E3.1.3.25, IMPA, suhB; myo-inositol-1(or 4)-monophosphatase [EC:3.1.3.25]	dre00562 Inositol phosphate metabolism - Danio rerio (zebrafish); dre01100 Metabolic pathways - Danio rerio (zebrafish); dre04070 Phosphatidylinositol signaling system - Danio rerio (zebrafish);
F02_transcript_2458	parp1, si:dkey-206f10.3, wu:fc60f12, zgc:110092; poly (ADP-ribose) polymerase 1 (EC:2.4.2.30); K10798 poly [ADP-ribose] polymerase [EC:2.4.2.30] (A)	0.742	Down	dre03410 Base excision repair - Danio rerio (zebrafish); dre04210 Apoptosis - Danio rerio (zebrafish); dre04217 Necroptosis - Danio rerio (zebrafish);	0.0098757	nucleus	GO:0000002 mitochondrial genome maintenance; GO:0000003 reproduction; GO:0000122 negative regulation of transcription from RNA polymerase II promoter; GO:0000302 response to reactive oxygen species; GO:0000303 response to superoxide; GO:0000305 response to oxygen radical; GO:0000715 nucleotide-excision repair, DNA damage recognition; GO:0000723 telomere maintenance; GO:0000724 double-strand break…	GO:0000228 nuclear chromosome; GO:0000785 chromatin; GO:0000790 nuclear chromatin; GO:0000791 euchromatin; GO:0005622 intracellular; GO:0005623 cell; GO:0005634 nucleus; GO:0005635 nuclear envelope; GO:0005654 nucleoplasm; GO:0005667 transcription factor complex; GO:0005694 chromosome; GO:0005700 polytene chromosome; GO:0005703 polytene chromosome puff; GO:0005719 nuclear euchromatin; GO:0005730 …	GO:0000166 nucleotide binding; GO:0000976 transcription regulatory region sequence-specific DNA binding; GO:0000977 RNA polymerase II regulatory region sequence-specific DNA binding; GO:0000981 RNA polymerase II transcription factor activity, sequence-specific DNA binding; GO:0001012 RNA polymerase II regulatory region DNA binding; GO:0001067 regulatory region nucleic acid binding; GO:0001228 tra…	K10798	PARP; poly [ADP-ribose] polymerase [EC:2.4.2.30]	dre03410 Base excision repair - Danio rerio (zebrafish); dre04210 Apoptosis - Danio rerio (zebrafish); dre04217 Necroptosis - Danio rerio (zebrafish);	PF00645; PF08063	Poly(ADP-ribose) polymerase and DNA-Ligase Zn-finger region; PADR1 (NUC008) domain
F02_transcript_12134	HBS1-like protein-like; K14416 elongation factor 1 alpha-like protein (A)	0.74	Down	dre03015 mRNA surveillance pathway - Danio rerio (zebrafish);	0.034545	nucleus	GO:0000288 nuclear-transcribed mRNA catabolic process, deadenylation-dependent decay; GO:0000291 nuclear-transcribed mRNA catabolic process, exonucleolytic; GO:0000956 nuclear-transcribed mRNA catabolic process; GO:0006139 nucleobase-containing compound metabolic process; GO:0006401 RNA catabolic process; GO:0006402 mRNA catabolic process; GO:0006412 translation; GO:0006518 peptide metabolic proc…	GO:0005622 intracellular; GO:0005623 cell; GO:0005737 cytoplasm; GO:0005829 cytosol; GO:0044424 intracellular part; GO:0044444 cytoplasmic part; GO:0044464 cell part;	GO:0000166 nucleotide binding; GO:0001882 nucleoside binding; GO:0001883 purine nucleoside binding; GO:0003824 catalytic activity; GO:0003924 GTPase activity; GO:0005488 binding; GO:0005515 protein binding; GO:0005525 GTP binding; GO:0016462 pyrophosphatase activity; GO:0016787 hydrolase activity; GO:0016817 hydrolase activity, acting on acid anhydrides; GO:0016818 hydrolase activity, acting on a…	K14416	HBS1; elongation factor 1 alpha-like protein	dre03015 mRNA surveillance pathway - Danio rerio (zebrafish);	PF00009; PF03144; PF03143	Elongation factor Tu GTP binding domain; Elongation factor Tu domain 2; Elongation factor Tu C-terminal domain
F02_transcript_22218	p53 apoptosis effector related to PMP-22-like; K10136 TP53 apoptosis effector (A)	0.738	Down	dre04115 p53 signaling pathway - Danio rerio (zebrafish);	0.0074768	plasma membrane	GO:0002934 desmosome organization; GO:0006508 proteolysis; GO:0006807 nitrogen compound metabolic process; GO:0006915 apoptotic process; GO:0007154 cell communication; GO:0007155 cell adhesion; GO:0007165 signal transduction; GO:0007166 cell surface receptor signaling pathway; GO:0007219 Notch signaling pathway; GO:0007275 multicellular organism development; GO:0008152 metabolic process; GO:00082…	GO:0005622 intracellular; GO:0005623 cell; GO:0005737 cytoplasm; GO:0005739 mitochondrion; GO:0005794 Golgi apparatus; GO:0005886 plasma membrane; GO:0005887 integral component of plasma membrane; GO:0012505 endomembrane system; GO:0016020 membrane; GO:0016021 integral component of membrane; GO:0031224 intrinsic component of membrane; GO:0031226 intrinsic component of plasma membrane; GO:0043226 …		K10136	PERP; TP53 apoptosis effector	dre04115 p53 signaling pathway - Danio rerio (zebrafish);
F02_transcript_12782	Uncharacterized protein	0.738	Down		0.0063573	extracellular							PF04548	AIG1 family
F02_transcript_2874	cadherin-2 precursor [Gallus gallus]	0.738	Down		0.0079841	cytoplasm							PF00028	Cadherin domain
F02_transcript_11443	gelsolin-like; K05768 gelsolin (A)	0.738	Down	dre04810 Regulation of actin cytoskeleton - Danio rerio (zebrafish);	0.0098188	nucleus				K05768	GSN; gelsolin	dre04810 Regulation of actin cytoskeleton - Danio rerio (zebrafish);	PF00626	Gelsolin repeat
F02_transcript_15993	sept12, fe23c11, si:dkey-23a11.2, wu:fe23c11; septin 12; K16938 septin 3/9/12 (A)	0.737	Down		0.000136852	cytoplasm		GO:0001725 stress fiber; GO:0005622 intracellular; GO:0005623 cell; GO:0005737 cytoplasm; GO:0005819 spindle; GO:0005856 cytoskeleton; GO:0005886 plasma membrane; GO:0005929 cilium; GO:0005938 cell cortex; GO:0015629 actin cytoskeleton; GO:0015630 microtubule cytoskeleton; GO:0016020 membrane; GO:0030496 midbody; GO:0031105 septin complex; GO:0031514 motile cilium; GO:0032153 cell division site; …	GO:0000166 nucleotide binding; GO:0001882 nucleoside binding; GO:0001883 purine nucleoside binding; GO:0005488 binding; GO:0005515 protein binding; GO:0005525 GTP binding; GO:0005543 phospholipid binding; GO:0008289 lipid binding; GO:0017076 purine nucleotide binding; GO:0019001 guanyl nucleotide binding; GO:0019003 GDP binding; GO:0032549 ribonucleoside binding; GO:0032550 purine ribonucleoside …	K16938	SEPT3_9_12; septin 3/9/12		PF00735	Septin
F02_transcript_25872	Golgin subfamily A member 7B [Zootermopsis nevadensis]	0.736	Down		0.029603	cytoplasm	GO:0001775 cell activation; GO:0002252 immune effector process; GO:0002263 cell activation involved in immune response; GO:0002274 myeloid leukocyte activation; GO:0002275 myeloid cell activation involved in immune response; GO:0002283 neutrophil activation involved in immune response; GO:0002366 leukocyte activation involved in immune response; GO:0002376 immune system process; GO:0002443 leukoc…	GO:0000139 Golgi membrane; GO:0002178 palmitoyltransferase complex; GO:0005576 extracellular region; GO:0005622 intracellular; GO:0005623 cell; GO:0005737 cytoplasm; GO:0005794 Golgi apparatus; GO:0005795 Golgi stack; GO:0012505 endomembrane system; GO:0016020 membrane; GO:0030141 secretory granule; GO:0031090 organelle membrane; GO:0031224 intrinsic component of membrane; GO:0031228 intrinsic co…					PF10256	Golgin subfamily A member 7/ERF4 family
F02_transcript_27405	COP9 signalosome complex subunit 8-like; K12181 COP9 signalosome complex subunit 8 (A)	0.734	Down		0.0066845	extracellular	GO:0000003 reproduction; GO:0000338 protein deneddylation; GO:0000715 nucleotide-excision repair, DNA damage recognition; GO:0001654 eye development; GO:0001745 compound eye morphogenesis; GO:0001932 regulation of protein phosphorylation; GO:0001934 positive regulation of protein phosphorylation; GO:0002009 morphogenesis of an epithelium; GO:0002165 instar larval or pupal development; GO:0003006 …	GO:0005622 intracellular; GO:0005623 cell; GO:0005634 nucleus; GO:0005654 nucleoplasm; GO:0005737 cytoplasm; GO:0005829 cytosol; GO:0008180 COP9 signalosome; GO:0031974 membrane-enclosed lumen; GO:0031981 nuclear lumen; GO:0032991 macromolecular complex; GO:0043226 organelle; GO:0043227 membrane-bounded organelle; GO:0043229 intracellular organelle; GO:0043231 intracellular membrane-bounded organ…		K12181	COPS8, CSN8; COP9 signalosome complex subunit 8
F02_transcript_1334	Uncharacterized protein	0.732	Down		6.3143e-05	nucleus	GO:0002200 somatic diversification of immune receptors; GO:0002237 response to molecule of bacterial origin; GO:0002376 immune system process; GO:0002377 immunoglobulin production; GO:0002440 production of molecular mediator of immune response; GO:0002520 immune system development; GO:0002566 somatic diversification of immune receptors via somatic mutation; GO:0006950 response to stress; GO:00069…	GO:0005622 intracellular; GO:0005623 cell; GO:0005634 nucleus; GO:0043226 organelle; GO:0043227 membrane-bounded organelle; GO:0043229 intracellular organelle; GO:0043231 intracellular membrane-bounded organelle; GO:0044424 intracellular part; GO:0044464 cell part;	GO:0003824 catalytic activity; GO:0003924 GTPase activity; GO:0016462 pyrophosphatase activity; GO:0016787 hydrolase activity; GO:0016817 hydrolase activity, acting on acid anhydrides; GO:0016818 hydrolase activity, acting on acid anhydrides, in phosphorus-containing anhydrides; GO:0017111 nucleoside-triphosphatase activity;				PF01541; PF00350	GIY-YIG catalytic domain; Dynamin family
F02_transcript_11495	deoxynucleoside triphosphate triphosphohydrolase SAMHD1 [Gallus gallus]	0.731	Down		0.0085815	cytoplasm	GO:0002252 immune effector process; GO:0002376 immune system process; GO:0002682 regulation of immune system process; GO:0006139 nucleobase-containing compound metabolic process; GO:0006163 purine nucleotide metabolic process; GO:0006195 purine nucleotide catabolic process; GO:0006203 dGTP catabolic process; GO:0006725 cellular aromatic compound metabolic process; GO:0006753 nucleoside phosphate …	GO:0005622 intracellular; GO:0005623 cell; GO:0005634 nucleus; GO:0005654 nucleoplasm; GO:0005886 plasma membrane; GO:0016020 membrane; GO:0031974 membrane-enclosed lumen; GO:0031981 nuclear lumen; GO:0043226 organelle; GO:0043227 membrane-bounded organelle; GO:0043229 intracellular organelle; GO:0043231 intracellular membrane-bounded organelle; GO:0043233 organelle lumen; GO:0044422 organelle pa…	GO:0000166 nucleotide binding; GO:0003676 nucleic acid binding; GO:0003723 RNA binding; GO:0003824 catalytic activity; GO:0004518 nuclease activity; GO:0004540 ribonuclease activity; GO:0005488 binding; GO:0005515 protein binding; GO:0008270 zinc ion binding; GO:0008832 dGTPase activity; GO:0016787 hydrolase activity; GO:0016788 hydrolase activity, acting on ester bonds; GO:0016793 triphosphoric …	K22544
F02_transcript_17265	LIM and SH3 domain protein 1-like isoform X2 [Stylophora pistillata]	0.73	Down		0.00014317	nucleus	GO:0000003 reproduction; GO:0003006 developmental process involved in reproduction; GO:0006810 transport; GO:0006811 ion transport; GO:0006996 organelle organization; GO:0007010 cytoskeleton organization; GO:0007015 actin filament organization; GO:0007275 multicellular organism development; GO:0007276 gamete generation; GO:0007277 pole cell development; GO:0007279 pole cell formation; GO:0007281 …	GO:0005622 intracellular; GO:0005623 cell; GO:0005737 cytoplasm; GO:0005856 cytoskeleton; GO:0005912 adherens junction; GO:0005924 cell-substrate adherens junction; GO:0005925 focal adhesion; GO:0005938 cell cortex; GO:0015629 actin cytoskeleton; GO:0030016 myofibril; GO:0030017 sarcomere; GO:0030018 Z disc; GO:0030054 cell junction; GO:0030055 cell-substrate junction; GO:0030863 cortical cytoske…	GO:0003779 actin binding; GO:0005070 SH3/SH2 adaptor activity; GO:0005215 transporter activity; GO:0005488 binding; GO:0005515 protein binding; GO:0008092 cytoskeletal protein binding; GO:0015075 ion transmembrane transporter activity; GO:0022857 transmembrane transporter activity; GO:0030674 protein binding, bridging; GO:0035591 signaling adaptor activity; GO:0044877 macromolecular complex bindi…				PF00412	LIM domain
F02_transcript_24893	tissue factor-like; K03901 coagulation factor III (tissue factor) (A)	0.724	Down	dre04933 AGE-RAGE signaling pathway in diabetic complications - Danio rerio (zebrafish);	0.00199803	plasma membrane	GO:0000302 response to reactive oxygen species; GO:0001936 regulation of endothelial cell proliferation; GO:0001938 positive regulation of endothelial cell proliferation; GO:0002237 response to molecule of bacterial origin; GO:0002526 acute inflammatory response; GO:0002541 activation of plasma proteins involved in acute inflammatory response; GO:0002543 activation of blood coagulation via clotti…	GO:0005576 extracellular region; GO:0005615 extracellular space; GO:0005622 intracellular; GO:0005623 cell; GO:0005737 cytoplasm; GO:0005886 plasma membrane; GO:0009897 external side of plasma membrane; GO:0009986 cell surface; GO:0016020 membrane; GO:0016021 integral component of membrane; GO:0031012 extracellular matrix; GO:0031224 intrinsic component of membrane; GO:0031226 intrinsic component…	GO:0002020 protease binding; GO:0004888 transmembrane signaling receptor activity; GO:0004896 cytokine receptor activity; GO:0005488 binding; GO:0005515 protein binding; GO:0005543 phospholipid binding; GO:0008289 lipid binding; GO:0019899 enzyme binding; GO:0038023 signaling receptor activity; GO:0043167 ion binding; GO:0043168 anion binding; GO:0060089 molecular transducer activity;	K03901	F3, CD142; coagulation factor III (tissue factor)	dre04933 AGE-RAGE signaling pathway in diabetic complications - Danio rerio (zebrafish);	PF09294	Interferon-alpha/beta receptor, fibronectin type III
F02_transcript_28919	ccdc12, zgc:101038; coiled-coil domain containing 12; K12871 coiled-coil domain-containing protein 12 (A)	0.723	Down	dre03040 Spliceosome - Danio rerio (zebrafish);	0.0080995	nucleus				K12871	CCDC12; coiled-coil domain-containing protein 12	dre03040 Spliceosome - Danio rerio (zebrafish);
F02_transcript_20859	oat; ornithine aminotransferase; K00819 ornithine--oxo-acid transaminase [EC:2.6.1.13] (A)	0.721	Down	dre00330 Arginine and proline metabolism - Danio rerio (zebrafish); dre01100 Metabolic pathways - Danio rerio (zebrafish);	0.036236	mitochondria	GO:0003008 system process; GO:0006082 organic acid metabolic process; GO:0006520 cellular amino acid metabolic process; GO:0006591 ornithine metabolic process; GO:0006807 nitrogen compound metabolic process; GO:0007600 sensory perception; GO:0007601 visual perception; GO:0008152 metabolic process; GO:0008652 cellular amino acid biosynthetic process; GO:0009058 biosynthetic process; GO:0009987 cel…	GO:0005622 intracellular; GO:0005623 cell; GO:0005634 nucleus; GO:0005654 nucleoplasm; GO:0005737 cytoplasm; GO:0005739 mitochondrion; GO:0005759 mitochondrial matrix; GO:0031974 membrane-enclosed lumen; GO:0031981 nuclear lumen; GO:0043226 organelle; GO:0043227 membrane-bounded organelle; GO:0043229 intracellular organelle; GO:0043231 intracellular membrane-bounded organelle; GO:0043233 organell…	GO:0003824 catalytic activity; GO:0003992 N2-acetyl-L-ornithine:2-oxoglutarate 5-aminotransferase activity; GO:0004587 ornithine-oxo-acid transaminase activity; GO:0005488 binding; GO:0005515 protein binding; GO:0008144 drug binding; GO:0008483 transaminase activity; GO:0016740 transferase activity; GO:0016769 transferase activity, transferring nitrogenous groups; GO:0019842 vitamin binding; GO:0…	K00819	rocD, OAT; ornithine--oxo-acid transaminase [EC:2.6.1.13]	dre00330 Arginine and proline metabolism - Danio rerio (zebrafish); dre01100 Metabolic pathways - Danio rerio (zebrafish);	PF00202	Aminotransferase class-III
F02_transcript_1620	protein phosphatase 1 regulatory subunit 14B-like; K17555 protein phosphatase 1 regulatory subunit 14B (A)	0.72	Down		0.0255	nucleus				K17555	PPP1R14B; protein phosphatase 1 regulatory subunit 14B
F02_transcript_28239	15-hydroxyprostaglandin dehydrogenase [NAD(+)]-like; K00069 15-hydroxyprostaglandin dehydrogenase (NAD) [EC:1.1.1.141] (A)	0.72	Down		0.0020231	cytoplasm	GO:0000003 reproduction; GO:0001523 retinoid metabolic process; GO:0001568 blood vessel development; GO:0001944 vasculature development; GO:0006066 alcohol metabolic process; GO:0006081 cellular aldehyde metabolic process; GO:0006082 organic acid metabolic process; GO:0006629 lipid metabolic process; GO:0006631 fatty acid metabolic process; GO:0006690 icosanoid metabolic process; GO:0006692 prost…	GO:0005576 extracellular region; GO:0005615 extracellular space; GO:0005622 intracellular; GO:0005623 cell; GO:0005634 nucleus; GO:0005654 nucleoplasm; GO:0005737 cytoplasm; GO:0005829 cytosol; GO:0005886 plasma membrane; GO:0016020 membrane; GO:0016323 basolateral plasma membrane; GO:0031974 membrane-enclosed lumen; GO:0031981 nuclear lumen; GO:0043226 organelle; GO:0043227 membrane-bounded orga…	GO:0000166 nucleotide binding; GO:0003824 catalytic activity; GO:0004745 retinol dehydrogenase activity; GO:0004888 transmembrane signaling receptor activity; GO:0004930 G-protein coupled receptor activity; GO:0004953 icosanoid receptor activity; GO:0004954 prostanoid receptor activity; GO:0004955 prostaglandin receptor activity; GO:0004957 prostaglandin E receptor activity; GO:0005488 binding; G…	K00069	HPGD; 15-hydroxyprostaglandin dehydrogenase (NAD) [EC:1.1.1.141]		PF00106	short chain dehydrogenase
F02_transcript_20594	gyg1a, fc13d04, fi23f07, gyg, gyg1, wu:fc13d04, wu:fi23f07, zgc:55385, zgc:85619; glycogenin 1a (EC:2.4.1.186); K00750 glycogenin glucosyltransferase [EC:2.4.1.186] (A)	0.717	Down	dre00500 Starch and sucrose metabolism - Danio rerio (zebrafish); dre01100 Metabolic pathways - Danio rerio (zebrafish);	0.000182407	nucleus	GO:0000271 polysaccharide biosynthetic process; GO:0001775 cell activation; GO:0002252 immune effector process; GO:0002263 cell activation involved in immune response; GO:0002274 myeloid leukocyte activation; GO:0002275 myeloid cell activation involved in immune response; GO:0002283 neutrophil activation involved in immune response; GO:0002366 leukocyte activation involved in immune response; GO:…	GO:0000323 lytic vacuole; GO:0005576 extracellular region; GO:0005622 intracellular; GO:0005623 cell; GO:0005737 cytoplasm; GO:0005764 lysosome; GO:0005773 vacuole; GO:0005775 vacuolar lumen; GO:0005829 cytosol; GO:0012505 endomembrane system; GO:0030141 secretory granule; GO:0031410 cytoplasmic vesicle; GO:0031974 membrane-enclosed lumen; GO:0031982 vesicle; GO:0031983 vesicle lumen; GO:0034774 …	GO:0003824 catalytic activity; GO:0005488 binding; GO:0005536 glucose binding; GO:0008194 UDP-glycosyltransferase activity; GO:0008466 glycogenin glucosyltransferase activity; GO:0016740 transferase activity; GO:0016757 transferase activity, transferring glycosyl groups; GO:0016758 transferase activity, transferring hexosyl groups; GO:0030246 carbohydrate binding; GO:0035251 UDP-glucosyltransfera…	K00750	GYG1, GYG2; glycogenin [EC:2.4.1.186]	dre00500 Starch and sucrose metabolism - Danio rerio (zebrafish); dre01100 Metabolic pathways - Danio rerio (zebrafish);
F02_transcript_12719	Synaptophysin, partial [Stegodyphus mimosarum]	0.716	Down		8.1355e-05	extracellular							PF01284	Membrane-associating domain
F02_transcript_22408	beta-1,4 N-acetylgalactosaminyltransferase 2-like; K09655 beta-1,4-N-acetylgalactosaminyltransferase 2 [EC:2.4.1.-] (A)	0.715	Down		0.0077783	mitochondria	GO:0006040 amino sugar metabolic process; GO:0006047 UDP-N-acetylglucosamine metabolic process; GO:0006139 nucleobase-containing compound metabolic process; GO:0006464 cellular protein modification process; GO:0006486 protein glycosylation; GO:0006487 protein N-linked glycosylation; GO:0006725 cellular aromatic compound metabolic process; GO:0006793 phosphorus metabolic process; GO:0006807 nitrog…	GO:0000139 Golgi membrane; GO:0005622 intracellular; GO:0005623 cell; GO:0005737 cytoplasm; GO:0005794 Golgi apparatus; GO:0012505 endomembrane system; GO:0016020 membrane; GO:0016021 integral component of membrane; GO:0031090 organelle membrane; GO:0031224 intrinsic component of membrane; GO:0031984 organelle subcompartment; GO:0043226 organelle; GO:0043227 membrane-bounded organelle; GO:0043229…	GO:0003824 catalytic activity; GO:0008194 UDP-glycosyltransferase activity; GO:0008376 acetylgalactosaminyltransferase activity; GO:0016740 transferase activity; GO:0016757 transferase activity, transferring glycosyl groups; GO:0016758 transferase activity, transferring hexosyl groups;
F02_transcript_2511	plakophilin-1-like; K10387 plakophilin 1 (A)	0.712	Down		5.5521e-05	nucleus	GO:0001775 cell activation; GO:0002252 immune effector process; GO:0002263 cell activation involved in immune response; GO:0002274 myeloid leukocyte activation; GO:0002275 myeloid cell activation involved in immune response; GO:0002283 neutrophil activation involved in immune response; GO:0002366 leukocyte activation involved in immune response; GO:0002376 immune system process; GO:0002443 leukoc…	GO:0001533 cornified envelope; GO:0005622 intracellular; GO:0005623 cell; GO:0005634 nucleus; GO:0005654 nucleoplasm; GO:0005737 cytoplasm; GO:0005856 cytoskeleton; GO:0005882 intermediate filament; GO:0005886 plasma membrane; GO:0005911 cell-cell junction; GO:0012505 endomembrane system; GO:0012506 vesicle membrane; GO:0016020 membrane; GO:0030054 cell junction; GO:0030057 desmosome; GO:0030141 …	GO:0005198 structural molecule activity; GO:0005488 binding; GO:0005515 protein binding; GO:0005521 lamin binding; GO:0019215 intermediate filament binding; GO:0030280 structural constituent of epidermis; GO:0044877 macromolecular complex binding;	K10387	PKP1; plakophilin 1
F02_transcript_28010	Uncharacterized protein	0.71	Down		0.026437	cytoplasm	GO:0010941 regulation of cell death; GO:0010942 positive regulation of cell death; GO:0042981 regulation of apoptotic process; GO:0043065 positive regulation of apoptotic process; GO:0043067 regulation of programmed cell death; GO:0043068 positive regulation of programmed cell death; GO:0048518 positive regulation of biological process; GO:0048522 positive regulation of cellular process; GO:00507…	GO:0005622 intracellular; GO:0005623 cell; GO:0005634 nucleus; GO:0043226 organelle; GO:0043227 membrane-bounded organelle; GO:0043229 intracellular organelle; GO:0043231 intracellular membrane-bounded organelle; GO:0044424 intracellular part; GO:0044464 cell part;
F02_transcript_14787	5'-nucleotidase domain-containing protein 2 [Stylophora pistillata]	0.708	Down		0.020222	nucleus	GO:0006793 phosphorus metabolic process; GO:0006796 phosphate-containing compound metabolic process; GO:0006950 response to stress; GO:0006974 cellular response to DNA damage stimulus; GO:0008152 metabolic process; GO:0009987 cellular process; GO:0016311 dephosphorylation; GO:0033554 cellular response to stress; GO:0044237 cellular metabolic process; GO:0050896 response to stimulus; GO:0051716 ce…	GO:0005622 intracellular; GO:0005623 cell; GO:0005634 nucleus; GO:0043226 organelle; GO:0043227 membrane-bounded organelle; GO:0043229 intracellular organelle; GO:0043231 intracellular membrane-bounded organelle; GO:0044424 intracellular part; GO:0044464 cell part;	GO:0003676 nucleic acid binding; GO:0003677 DNA binding; GO:0003697 single-stranded DNA binding; GO:0003824 catalytic activity; GO:0005488 binding; GO:0008252 nucleotidase activity; GO:0008253 5'-nucleotidase activity; GO:0016787 hydrolase activity; GO:0016788 hydrolase activity, acting on ester bonds; GO:0016791 phosphatase activity; GO:0042578 phosphoric ester hydrolase activity; GO:0097159 org…
F02_transcript_27261	PYCARD; PYD and CARD domain containing; K12799 apoptosis-associated speck-like protein containing a CARD (A)	0.707	Down	dre04080 Neuroactive ligand-receptor interaction - Danio rerio (zebrafish);	0.00092485	cytoplasm,nucleus	GO:0001773 myeloid dendritic cell activation; GO:0001775 cell activation; GO:0001816 cytokine production; GO:0001817 regulation of cytokine production; GO:0001818 negative regulation of cytokine production; GO:0001819 positive regulation of cytokine production; GO:0001932 regulation of protein phosphorylation; GO:0001933 negative regulation of protein phosphorylation; GO:0001934 positive regulati…	GO:0000323 lytic vacuole; GO:0005576 extracellular region; GO:0005622 intracellular; GO:0005623 cell; GO:0005634 nucleus; GO:0005730 nucleolus; GO:0005737 cytoplasm; GO:0005739 mitochondrion; GO:0005764 lysosome; GO:0005766 primary lysosome; GO:0005773 vacuole; GO:0005775 vacuolar lumen; GO:0005783 endoplasmic reticulum; GO:0005829 cytosol; GO:0008385 IkappaB kinase complex; GO:0012505 endomembra…	GO:0002020 protease binding; GO:0003824 catalytic activity; GO:0004175 endopeptidase activity; GO:0004197 cysteine-type endopeptidase activity; GO:0005102 receptor binding; GO:0005126 cytokine receptor binding; GO:0005138 interleukin-6 receptor binding; GO:0005488 binding; GO:0005515 protein binding; GO:0005523 tropomyosin binding; GO:0008047 enzyme activator activity; GO:0008092 cytoskeletal pro…	K04219	SSTR3; somatostatin receptor 3	dre04080 Neuroactive ligand-receptor interaction - Danio rerio (zebrafish);	PF02758; PF00619	PAAD/DAPIN/Pyrin domain; Caspase recruitment domain
F02_transcript_18938	calpain-2 catalytic subunit [Sus scrofa]	0.707	Down		0.00156182	nucleus	GO:0000003 reproduction; GO:0000768 syncytium formation by plasma membrane fusion; GO:0001667 ameboidal-type cell migration; GO:0002064 epithelial cell development; GO:0002065 columnar/cuboidal epithelial cell differentiation; GO:0002066 columnar/cuboidal epithelial cell development; GO:0003002 regionalization; GO:0003006 developmental process involved in reproduction; GO:0006355 regulation of tr…	GO:0005622 intracellular; GO:0005623 cell; GO:0005737 cytoplasm; GO:0005856 cytoskeleton; GO:0015629 actin cytoskeleton; GO:0036477 somatodendritic compartment; GO:0043025 neuronal cell body; GO:0043226 organelle; GO:0043228 non-membrane-bounded organelle; GO:0043229 intracellular organelle; GO:0043232 intracellular non-membrane-bounded organelle; GO:0044297 cell body; GO:0044424 intracellular pa…	GO:0003824 catalytic activity; GO:0004175 endopeptidase activity; GO:0004197 cysteine-type endopeptidase activity; GO:0004198 calcium-dependent cysteine-type endopeptidase activity; GO:0005488 binding; GO:0005509 calcium ion binding; GO:0008233 peptidase activity; GO:0008234 cysteine-type peptidase activity; GO:0016787 hydrolase activity; GO:0043167 ion binding; GO:0043169 cation binding; GO:0046…				PF01067	Calpain large subunit, domain III
F02_transcript_17579	krt4, cb59, etID20321.6, krt8, wu:fa91a11, wu:fd19e09, wu:fl23c09, zf-K8; keratin 4; K07605 type II keratin, basic (A)	0.697	Down		0.0185765	nucleus				K07605	KRT2; type II keratin, basic
F02_transcript_9710	aifm1, AIF, pdcd8, zgc:91994; apoptosis-inducing factor, mitochondrion-associated 1; K04727 programmed cell death 8 (apoptosis-inducing factor) [EC:1.-.-.-] (A)	0.697	Down	dre04210 Apoptosis - Danio rerio (zebrafish); dre04217 Necroptosis - Danio rerio (zebrafish);	0.0186435	cytoplasm	GO:0000302 response to reactive oxygen species; GO:0000737 DNA catabolic process, endonucleolytic; GO:0001101 response to acid chemical; GO:0002931 response to ischemia; GO:0006091 generation of precursor metabolites and energy; GO:0006119 oxidative phosphorylation; GO:0006139 nucleobase-containing compound metabolic process; GO:0006163 purine nucleotide metabolic process; GO:0006259 DNA metaboli…	GO:0005622 intracellular; GO:0005623 cell; GO:0005634 nucleus; GO:0005737 cytoplasm; GO:0005739 mitochondrion; GO:0005740 mitochondrial envelope; GO:0005741 mitochondrial outer membrane; GO:0005743 mitochondrial inner membrane; GO:0005758 mitochondrial intermembrane space; GO:0005829 cytosol; GO:0016020 membrane; GO:0019866 organelle inner membrane; GO:0019867 outer membrane; GO:0031090 organelle…	GO:0000166 nucleotide binding; GO:0003676 nucleic acid binding; GO:0003677 DNA binding; GO:0003824 catalytic activity; GO:0004174 electron-transferring-flavoprotein dehydrogenase activity; GO:0005488 binding; GO:0005515 protein binding; GO:0009055 electron carrier activity; GO:0016174 NAD(P)H oxidase activity; GO:0016491 oxidoreductase activity; GO:0016645 oxidoreductase activity, acting on the C…	K04727	PDCD8, AIF; programmed cell death 8 (apoptosis-inducing factor) [EC:1.-.-.-]	dre04210 Apoptosis - Danio rerio (zebrafish); dre04217 Necroptosis - Danio rerio (zebrafish);	PF07992	Pyridine nucleotide-disulphide oxidoreductase
F02_transcript_16739	adipocyte differentiation-related protein [Gallus gallus]	0.689	Down		6.2457e-05	nucleus				K20287	PLIN3; perilipin-3
F02_transcript_13447	V-type proton ATPase 116 kDa subunit a isoform 3-like; K02154 V-type H+-transporting ATPase subunit a (A)	0.683	Down	dre00190 Oxidative phosphorylation - Danio rerio (zebrafish); dre01100 Metabolic pathways - Danio rerio (zebrafish); dre04142 Lysosome - Danio rerio (zebrafish); dre04145 Phagosome - Danio rerio (zebrafish);	0.042495	plasma membrane				K02154	ATPeV0A, ATP6N; V-type H+-transporting ATPase subunit a	dre00190 Oxidative phosphorylation - Danio rerio (zebrafish); dre01100 Metabolic pathways - Danio rerio (zebrafish); dre04142 Lysosome - Danio rerio (zebrafish); dre04145 Phagosome - Danio rerio (zebrafish);
F02_transcript_26051	krt91, fb05e09, wu:fa91b04, wu:fa97a07, wu:fb05e09, zgc:92533; keratin 91; K07604 type I keratin, acidic (A)	0.68	Down		8.4656e-05	cytoplasm,nucleus	GO:0000003 reproduction; GO:0001101 response to acid chemical; GO:0001558 regulation of cell growth; GO:0001654 eye development; GO:0001667 ameboidal-type cell migration; GO:0001775 cell activation; GO:0001942 hair follicle development; GO:0002009 morphogenesis of an epithelium; GO:0002064 epithelial cell development; GO:0002376 immune system process; GO:0003008 system process; GO:0003334 keratin…	GO:0001533 cornified envelope; GO:0005576 extracellular region; GO:0005615 extracellular space; GO:0005622 intracellular; GO:0005623 cell; GO:0005737 cytoplasm; GO:0005829 cytosol; GO:0005856 cytoskeleton; GO:0005882 intermediate filament; GO:0005886 plasma membrane; GO:0016020 membrane; GO:0031982 vesicle; GO:0043226 organelle; GO:0043227 membrane-bounded organelle; GO:0043228 non-membrane-bound…	GO:0004888 transmembrane signaling receptor activity; GO:0005102 receptor binding; GO:0005198 structural molecule activity; GO:0005200 structural constituent of cytoskeleton; GO:0005488 binding; GO:0005515 protein binding; GO:0008092 cytoskeletal protein binding; GO:0030280 structural constituent of epidermis; GO:0032395 MHC class II receptor activity; GO:0038023 signaling receptor activity; GO:0…	K07604	KRT1; type I keratin, acidic
F02_transcript_8206	catenin beta-1-like; K02105 catenin beta 1 (A)	0.678	Down	dre04310 Wnt signaling pathway - Danio rerio (zebrafish); dre04510 Focal adhesion - Danio rerio (zebrafish); dre04520 Adherens junction - Danio rerio (zebrafish); dre04916 Melanogenesis - Danio rerio (zebrafish);	0.000122257	cytoplasm,nucleus	GO:0000003 reproduction; GO:0000122 negative regulation of transcription from RNA polymerase II promoter; GO:0000132 establishment of mitotic spindle orientation; GO:0000226 microtubule cytoskeleton organization; GO:0000278 mitotic cell cycle; GO:0000578 embryonic axis specification; GO:0000902 cell morphogenesis; GO:0000904 cell morphogenesis involved in differentiation; GO:0001501 skeletal syst…	GO:0000228 nuclear chromosome; GO:0000785 chromatin; GO:0000790 nuclear chromatin; GO:0000791 euchromatin; GO:0005622 intracellular; GO:0005623 cell; GO:0005634 nucleus; GO:0005635 nuclear envelope; GO:0005654 nucleoplasm; GO:0005667 transcription factor complex; GO:0005694 chromosome; GO:0005719 nuclear euchromatin; GO:0005737 cytoplasm; GO:0005813 centrosome; GO:0005815 microtubule organizing c…	GO:0001085 RNA polymerase II transcription factor binding; GO:0001102 RNA polymerase II activating transcription factor binding; GO:0003682 chromatin binding; GO:0003700 transcription factor activity, sequence-specific DNA binding; GO:0003712 transcription cofactor activity; GO:0003713 transcription coactivator activity; GO:0005102 receptor binding; GO:0005488 binding; GO:0005515 protein binding;…	K02105	CTNNB1; catenin beta 1	dre04310 Wnt signaling pathway - Danio rerio (zebrafish); dre04510 Focal adhesion - Danio rerio (zebrafish); dre04520 Adherens junction - Danio rerio (zebrafish); dre04916 Melanogenesis - Danio rerio (zebrafish);
F02_transcript_7388	adpgk2; ADP-dependent glucokinase 2; K08074 ADP-dependent glucokinase [EC:2.7.1.147] (A)	0.675	Down	dre00010 Glycolysis / Gluconeogenesis - Danio rerio (zebrafish); dre01100 Metabolic pathways - Danio rerio (zebrafish); dre01200 Carbon metabolism - Danio rerio (zebrafish);	0.031478	nucleus				K08074	ADPGK; ADP-dependent glucokinase [EC:2.7.1.147]	dre00010 Glycolysis / Gluconeogenesis - Danio rerio (zebrafish); dre01100 Metabolic pathways - Danio rerio (zebrafish); dre01200 Carbon metabolism - Danio rerio (zebrafish);
F02_transcript_7447	Uncharacterized protein	0.674	Down		0.018143	plasma membrane	GO:0003008 system process; GO:0003012 muscle system process; GO:0005513 detection of calcium ion; GO:0006091 generation of precursor metabolites and energy; GO:0006355 regulation of transcription, DNA-templated; GO:0006464 cellular protein modification process; GO:0006508 proteolysis; GO:0006807 nitrogen compound metabolic process; GO:0006810 transport; GO:0006811 ion transport; GO:0006812 cation…	GO:0005622 intracellular; GO:0005623 cell; GO:0005737 cytoplasm; GO:0005783 endoplasmic reticulum; GO:0005788 endoplasmic reticulum lumen; GO:0005789 endoplasmic reticulum membrane; GO:0005886 plasma membrane; GO:0005938 cell cortex; GO:0012505 endomembrane system; GO:0014701 junctional sarcoplasmic reticulum membrane; GO:0016020 membrane; GO:0016021 integral component of membrane; GO:0016528 sar…	GO:0003824 catalytic activity; GO:0004597 peptide-aspartate beta-dioxygenase activity; GO:0005198 structural molecule activity; GO:0005488 binding; GO:0005509 calcium ion binding; GO:0005515 protein binding; GO:0008307 structural constituent of muscle; GO:0009055 electron carrier activity; GO:0016491 oxidoreductase activity; GO:0016705 oxidoreductase activity, acting on paired donors, with incorp…
F02_transcript_176	periplakin-like; K10386 periplakin (A)	0.671	Down		5.6943e-05	cytoplasm	GO:0006996 organelle organization; GO:0007010 cytoskeleton organization; GO:0007275 multicellular organism development; GO:0008219 cell death; GO:0008544 epidermis development; GO:0009605 response to external stimulus; GO:0009612 response to mechanical stimulus; GO:0009628 response to abiotic stimulus; GO:0009888 tissue development; GO:0009913 epidermal cell differentiation; GO:0009987 cellular p…	GO:0001533 cornified envelope; GO:0005622 intracellular; GO:0005623 cell; GO:0005634 nucleus; GO:0005737 cytoplasm; GO:0005739 mitochondrion; GO:0005829 cytosol; GO:0005856 cytoskeleton; GO:0005886 plasma membrane; GO:0005911 cell-cell junction; GO:0016020 membrane; GO:0019897 extrinsic component of plasma membrane; GO:0019898 extrinsic component of membrane; GO:0030054 cell junction; GO:0030057 …	GO:0005198 structural molecule activity; GO:0005200 structural constituent of cytoskeleton;	K10386	PPL; periplakin
F02_transcript_16742	WD repeat-containing protein 1 [Rattus norvegicus]	0.669	Down		0.00032204	nucleus	GO:0000003 reproduction; GO:0000902 cell morphogenesis; GO:0000904 cell morphogenesis involved in differentiation; GO:0001667 ameboidal-type cell migration; GO:0001736 establishment of planar polarity; GO:0001738 morphogenesis of a polarized epithelium; GO:0002009 morphogenesis of an epithelium; GO:0002064 epithelial cell development; GO:0002065 columnar/cuboidal epithelial cell differentiation; …	GO:0005576 extracellular region; GO:0005622 intracellular; GO:0005623 cell; GO:0005634 nucleus; GO:0005737 cytoplasm; GO:0005829 cytosol; GO:0005856 cytoskeleton; GO:0005884 actin filament; GO:0005886 plasma membrane; GO:0005911 cell-cell junction; GO:0005938 cell cortex; GO:0015629 actin cytoskeleton; GO:0016020 membrane; GO:0016528 sarcoplasm; GO:0030016 myofibril; GO:0030054 cell junction; GO:…	GO:0003779 actin binding; GO:0005488 binding; GO:0005515 protein binding; GO:0008092 cytoskeletal protein binding; GO:0044877 macromolecular complex binding; GO:0051015 actin filament binding;
F02_transcript_6885	perp, fk24g11, wu:fk24g11; PERP, TP53 apoptosis effector; K10136 TP53 apoptosis effector (A)	0.665	Down	dre04115 p53 signaling pathway - Danio rerio (zebrafish);	0.0155791	plasma membrane	GO:0002934 desmosome organization; GO:0006508 proteolysis; GO:0006807 nitrogen compound metabolic process; GO:0006915 apoptotic process; GO:0007154 cell communication; GO:0007155 cell adhesion; GO:0007165 signal transduction; GO:0007166 cell surface receptor signaling pathway; GO:0007219 Notch signaling pathway; GO:0007275 multicellular organism development; GO:0008152 metabolic process; GO:00082…	GO:0005622 intracellular; GO:0005623 cell; GO:0005737 cytoplasm; GO:0005739 mitochondrion; GO:0005794 Golgi apparatus; GO:0005886 plasma membrane; GO:0005887 integral component of plasma membrane; GO:0012505 endomembrane system; GO:0016020 membrane; GO:0016021 integral component of membrane; GO:0031224 intrinsic component of membrane; GO:0031226 intrinsic component of plasma membrane; GO:0043226 …		K10136	PERP; TP53 apoptosis effector	dre04115 p53 signaling pathway - Danio rerio (zebrafish);
F02_transcript_10311	annexin A3-like; K17089 annexin A3 (A)	0.664	Down		0.0157414	nucleus	GO:0001775 cell activation; GO:0002252 immune effector process; GO:0002263 cell activation involved in immune response; GO:0002274 myeloid leukocyte activation; GO:0002275 myeloid cell activation involved in immune response; GO:0002283 neutrophil activation involved in immune response; GO:0002366 leukocyte activation involved in immune response; GO:0002376 immune system process; GO:0002443 leukoc…	GO:0005622 intracellular; GO:0005623 cell; GO:0005737 cytoplasm; GO:0005829 cytosol; GO:0005886 plasma membrane; GO:0012505 endomembrane system; GO:0012506 vesicle membrane; GO:0016020 membrane; GO:0030139 endocytic vesicle; GO:0030141 secretory granule; GO:0030424 axon; GO:0030425 dendrite; GO:0030659 cytoplasmic vesicle membrane; GO:0030666 endocytic vesicle membrane; GO:0030670 phagocytic vesi…	GO:0003779 actin binding; GO:0004857 enzyme inhibitor activity; GO:0004859 phospholipase inhibitor activity; GO:0005488 binding; GO:0005515 protein binding; GO:0005543 phospholipid binding; GO:0005544 calcium-dependent phospholipid binding; GO:0008092 cytoskeletal protein binding; GO:0008289 lipid binding; GO:0019834 phospholipase A2 inhibitor activity; GO:0030234 enzyme regulator activity; GO:00…	K17089	ANXA3; annexin A3
F02_transcript_2075	UPF0505 protein C16orf62-like [Stylophora pistillata]	0.656	Down		0.027864	cytoplasm	GO:0001775 cell activation; GO:0002252 immune effector process; GO:0002263 cell activation involved in immune response; GO:0002274 myeloid leukocyte activation; GO:0002275 myeloid cell activation involved in immune response; GO:0002283 neutrophil activation involved in immune response; GO:0002366 leukocyte activation involved in immune response; GO:0002376 immune system process; GO:0002443 leukoc…	GO:0005622 intracellular; GO:0005623 cell; GO:0005737 cytoplasm; GO:0005886 plasma membrane; GO:0012505 endomembrane system; GO:0012506 vesicle membrane; GO:0016020 membrane; GO:0030141 secretory granule; GO:0030659 cytoplasmic vesicle membrane; GO:0030667 secretory granule membrane; GO:0031090 organelle membrane; GO:0031410 cytoplasmic vesicle; GO:0031982 vesicle; GO:0043226 organelle; GO:004322…
F02_transcript_25245	epithelial cell adhesion molecule-like; K06737 tumor-associated calcium signal transducer 1 (A)	0.656	Down		0.0028575	extracellular	GO:0001655 urogenital system development; GO:0001657 ureteric bud development; GO:0001822 kidney development; GO:0001823 mesonephros development; GO:0002009 morphogenesis of an epithelium; GO:0002376 immune system process; GO:0003008 system process; GO:0006355 regulation of transcription, DNA-templated; GO:0006357 regulation of transcription from RNA polymerase II promoter; GO:0006928 movement of…	GO:0005576 extracellular region; GO:0005615 extracellular space; GO:0005622 intracellular; GO:0005623 cell; GO:0005634 nucleus; GO:0005737 cytoplasm; GO:0005829 cytosol; GO:0005886 plasma membrane; GO:0005887 integral component of plasma membrane; GO:0005911 cell-cell junction; GO:0005923 bicellular tight junction; GO:0009925 basal plasma membrane; GO:0009986 cell surface; GO:0016020 membrane; GO…	GO:0005488 binding; GO:0005515 protein binding; GO:0038023 signaling receptor activity; GO:0044877 macromolecular complex binding; GO:0045296 cadherin binding; GO:0050839 cell adhesion molecule binding; GO:0060089 molecular transducer activity; GO:0098631 protein binding involved in cell adhesion; GO:0098632 protein binding involved in cell-cell adhesion; GO:0098641 cadherin binding involved in c…	K06737	EPCAM, TACSTD1, CD326; epithelial cell adhesion molecule		PF00086	Thyroglobulin type-1 repeat
F02_transcript_19426	4F2 cell-surface antigen heavy chain-like; K06519 solute carrier family 3, member 2 (A)	0.652	Down	dre04150 mTOR signaling pathway - Danio rerio (zebrafish); dre04216 Ferroptosis - Danio rerio (zebrafish);	0.0031566	cytoplasm	GO:0002376 immune system process; GO:0003333 amino acid transmembrane transport; GO:0006810 transport; GO:0006811 ion transport; GO:0006812 cation transport; GO:0006814 sodium ion transport; GO:0006816 calcium ion transport; GO:0006820 anion transport; GO:0006865 amino acid transport; GO:0006928 movement of cell or subcellular component; GO:0009987 cellular process; GO:0010033 response to organic…	GO:0005622 intracellular; GO:0005623 cell; GO:0005634 nucleus; GO:0005737 cytoplasm; GO:0005829 cytosol; GO:0005886 plasma membrane; GO:0009986 cell surface; GO:0016020 membrane; GO:0016021 integral component of membrane; GO:0016324 apical plasma membrane; GO:0031224 intrinsic component of membrane; GO:0031410 cytoplasmic vesicle; GO:0031982 vesicle; GO:0042470 melanosome; GO:0043226 organelle; G…	GO:0003676 nucleic acid binding; GO:0003723 RNA binding; GO:0003725 double-stranded RNA binding; GO:0005215 transporter activity; GO:0005342 organic acid transmembrane transporter activity; GO:0005432 calcium:sodium antiporter activity; GO:0005488 binding; GO:0008324 cation transmembrane transporter activity; GO:0008509 anion transmembrane transporter activity; GO:0008514 organic anion transmembr…	K06519	SLC3A2, MDU1, CD98; solute carrier family 3, member 2	dre04150 mTOR signaling pathway - Danio rerio (zebrafish); dre04216 Ferroptosis - Danio rerio (zebrafish);	PF00128	Alpha amylase, catalytic domain
F02_transcript_1160	clustered mitochondria protein homolog; K03255 protein TIF31 (A)	0.651	Down		1.83316e-05	nucleus							PF13236	Clustered mitochondria
F02_transcript_2529	cadherin-2 precursor [Gallus gallus]	0.647	Down		0.000158253	cytoplasm	GO:0001701 in utero embryonic development; GO:0001775 cell activation; GO:0002027 regulation of heart rate; GO:0002252 immune effector process; GO:0002263 cell activation involved in immune response; GO:0002274 myeloid leukocyte activation; GO:0002275 myeloid cell activation involved in immune response; GO:0002283 neutrophil activation involved in immune response; GO:0002366 leukocyte activation …	GO:0001533 cornified envelope; GO:0005576 extracellular region; GO:0005622 intracellular; GO:0005623 cell; GO:0005737 cytoplasm; GO:0005886 plasma membrane; GO:0005911 cell-cell junction; GO:0005912 adherens junction; GO:0005913 cell-cell adherens junction; GO:0005921 gap junction; GO:0012505 endomembrane system; GO:0012506 vesicle membrane; GO:0014704 intercalated disc; GO:0016020 membrane; GO:0…	GO:0005488 binding; GO:0005509 calcium ion binding; GO:0005515 protein binding; GO:0043167 ion binding; GO:0043169 cation binding; GO:0045295 gamma-catenin binding; GO:0046872 metal ion binding; GO:0086080 protein binding involved in heterotypic cell-cell adhesion; GO:0086083 cell adhesive protein binding involved in bundle of His cell-Purkinje myocyte communication; GO:0098631 protein binding in…	K07601	DSC2; desmocollin 2		PF00028	Cadherin domain
F02_transcript_71	EVPL; envoplakin; K10383 envoplakin (A)	0.645	Down		0.0027221	cytoplasm	GO:0006464 cellular protein modification process; GO:0006807 nitrogen compound metabolic process; GO:0007275 multicellular organism development; GO:0008152 metabolic process; GO:0008219 cell death; GO:0008544 epidermis development; GO:0009888 tissue development; GO:0009913 epidermal cell differentiation; GO:0009987 cellular process; GO:0012501 programmed cell death; GO:0018149 peptide cross-linki…	GO:0001533 cornified envelope; GO:0005622 intracellular; GO:0005623 cell; GO:0005737 cytoplasm; GO:0005829 cytosol; GO:0005856 cytoskeleton; GO:0005886 plasma membrane; GO:0005911 cell-cell junction; GO:0016020 membrane; GO:0030054 cell junction; GO:0030057 desmosome; GO:0043226 organelle; GO:0043228 non-membrane-bounded organelle; GO:0043229 intracellular organelle; GO:0043232 intracellular non-…	GO:0005198 structural molecule activity; GO:0005488 binding; GO:0005515 protein binding; GO:0030674 protein binding, bridging; GO:0060090 binding, bridging;	K10383	EVPL; envoplakin
F02_transcript_20343	acat1, fd16h07, fd20g06, wu:fd16h07, wu:fd20g06, zgc:86832; acetyl-CoA acetyltransferase 1 (EC:2.3.1.9); K00626 acetyl-CoA C-acetyltransferase [EC:2.3.1.9] (A)	0.644	Down	dre00071 Fatty acid degradation - Danio rerio (zebrafish); dre00072 Synthesis and degradation of ketone bodies - Danio rerio (zebrafish); dre00280 Valine, leucine and isoleucine degradation - Danio rerio (zebrafish); dre00310 Lysine degradation - Danio rerio (zebrafish); dre00380 Tryptophan metabolism - Danio rerio (zebrafish); dre00620 Pyruvate metabolism - Danio rerio (zebrafish); dre00630 Glyo…	0.00039599	mitochondria	GO:0001655 urogenital system development; GO:0001656 metanephros development; GO:0001822 kidney development; GO:0001889 liver development; GO:0006082 organic acid metabolic process; GO:0006084 acetyl-CoA metabolic process; GO:0006085 acetyl-CoA biosynthetic process; GO:0006090 pyruvate metabolic process; GO:0006091 generation of precursor metabolites and energy; GO:0006139 nucleobase-containing c…	GO:0005622 intracellular; GO:0005623 cell; GO:0005737 cytoplasm; GO:0005739 mitochondrion; GO:0005759 mitochondrial matrix; GO:0005777 peroxisome; GO:0031974 membrane-enclosed lumen; GO:0042579 microbody; GO:0043226 organelle; GO:0043227 membrane-bounded organelle; GO:0043229 intracellular organelle; GO:0043231 intracellular membrane-bounded organelle; GO:0043233 organelle lumen; GO:0044422 organ…	GO:0003824 catalytic activity; GO:0003985 acetyl-CoA C-acetyltransferase activity; GO:0003988 acetyl-CoA C-acyltransferase activity; GO:0005488 binding; GO:0005515 protein binding; GO:0016407 acetyltransferase activity; GO:0016408 C-acyltransferase activity; GO:0016453 C-acetyltransferase activity; GO:0016740 transferase activity; GO:0016746 transferase activity, transferring acyl groups; GO:0016…	K00626	E2.3.1.9, atoB; acetyl-CoA C-acetyltransferase [EC:2.3.1.9]	dre00071 Fatty acid degradation - Danio rerio (zebrafish); dre00072 Synthesis and degradation of ketone bodies - Danio rerio (zebrafish); dre00280 Valine, leucine and isoleucine degradation - Danio rerio (zebrafish); dre00310 Lysine degradation - Danio rerio (zebrafish); dre00380 Tryptophan metabolism - Danio rerio (zebrafish); dre00620 Pyruvate metabolism - Danio rerio (zebrafish); dre00630 Glyo…	PF00108; PF02803	Thiolase, N-terminal domain; Thiolase, C-terminal domain
F02_transcript_30153	cytochrome c oxidase subunit 6B1-like; K02267 cytochrome c oxidase subunit 6b (A)	0.625	Down	dre00190 Oxidative phosphorylation - Danio rerio (zebrafish); dre01100 Metabolic pathways - Danio rerio (zebrafish); dre04260 Cardiac muscle contraction - Danio rerio (zebrafish);	0.0029029	extracellular	GO:0006091 generation of precursor metabolites and energy; GO:0006810 transport; GO:0006811 ion transport; GO:0006812 cation transport; GO:0006996 organelle organization; GO:0007005 mitochondrion organization; GO:0008152 metabolic process; GO:0008535 respiratory chain complex IV assembly; GO:0009987 cellular process; GO:0015672 monovalent inorganic cation transport; GO:0016043 cellular component …	GO:0005622 intracellular; GO:0005623 cell; GO:0005737 cytoplasm; GO:0005739 mitochondrion; GO:0005740 mitochondrial envelope; GO:0005743 mitochondrial inner membrane; GO:0005746 mitochondrial respiratory chain; GO:0005751 mitochondrial respiratory chain complex IV; GO:0005758 mitochondrial intermembrane space; GO:0016020 membrane; GO:0019866 organelle inner membrane; GO:0031090 organelle membrane…	GO:0003824 catalytic activity; GO:0004129 cytochrome-c oxidase activity; GO:0005215 transporter activity; GO:0008324 cation transmembrane transporter activity; GO:0009055 electron carrier activity; GO:0015002 heme-copper terminal oxidase activity; GO:0015075 ion transmembrane transporter activity; GO:0015077 monovalent inorganic cation transmembrane transporter activity; GO:0015078 hydrogen ion t…	K02267	COX6B; cytochrome c oxidase subunit 6b	dre00190 Oxidative phosphorylation - Danio rerio (zebrafish); dre01100 Metabolic pathways - Danio rerio (zebrafish); dre04260 Cardiac muscle contraction - Danio rerio (zebrafish);	PF02297	Cytochrome oxidase c subunit VIb
F02_transcript_24003	grap2a, zgc:112091; GRB2-related adaptor protein 2a; K07366 GRB2-related adaptor protein 2 (A)	0.624	Down		0.043196	nucleus	GO:0002253 activation of immune response; GO:0002376 immune system process; GO:0002429 immune response-activating cell surface receptor signaling pathway; GO:0002682 regulation of immune system process; GO:0002684 positive regulation of immune system process; GO:0002694 regulation of leukocyte activation; GO:0002696 positive regulation of leukocyte activation; GO:0002757 immune response-activatin…	GO:0005622 intracellular; GO:0005623 cell; GO:0005634 nucleus; GO:0005737 cytoplasm; GO:0005768 endosome; GO:0005829 cytosol; GO:0005886 plasma membrane; GO:0009898 cytoplasmic side of plasma membrane; GO:0012505 endomembrane system; GO:0016020 membrane; GO:0019897 extrinsic component of plasma membrane; GO:0019898 extrinsic component of membrane; GO:0031234 extrinsic component of cytoplasmic sid…	GO:0003824 catalytic activity; GO:0004672 protein kinase activity; GO:0004713 protein tyrosine kinase activity; GO:0004715 non-membrane spanning protein tyrosine kinase activity; GO:0005070 SH3/SH2 adaptor activity; GO:0005102 receptor binding; GO:0005488 binding; GO:0005515 protein binding; GO:0016301 kinase activity; GO:0016740 transferase activity; GO:0016772 transferase activity, transferring…	K07366	GRAP2, GADS; GRB2-related adaptor protein 2		PF00018; PF00017	SH3 domain; SH2 domain
F02_transcript_14210	COMM domain-containing protein 2-like [Stylophora pistillata]	0.622	Down		0.010883	cytoplasm				K22558			PF07258	HCaRG protein
F02_transcript_25565	Uncharacterized protein	0.621	Down		0.00160407	extracellular							PF13927	Immunoglobulin domain
F02_transcript_26424	cirbpa, wu:fb12a12, wu:fb16h02, wu:fb55a06, wu:fc67h01, wu:fj10g10, zgc:109887, zgc:112425; cold inducible RNA binding protein a; K13195 cold-inducible RNA-binding protein (A)	0.618	Down		0.0026976	nucleus				K13195	CIRBP; cold-inducible RNA-binding protein		PF00076	RNA recognition motif. (a.k.a. RRM, RBD, or RNP domain)
F02_transcript_6041	glutamine--fructose-6-phosphate aminotransferase [isomerizing] 2-like; K00820 glucosamine--fructose-6-phosphate aminotransferase (isomerizing) [EC:2.6.1.16] (A)	0.614	Down	dre00250 Alanine, aspartate and glutamate metabolism - Danio rerio (zebrafish); dre00520 Amino sugar and nucleotide sugar metabolism - Danio rerio (zebrafish); dre01100 Metabolic pathways - Danio rerio (zebrafish);	0.00145668	cytoplasm	GO:0006002 fructose 6-phosphate metabolic process; GO:0006040 amino sugar metabolic process; GO:0006047 UDP-N-acetylglucosamine metabolic process; GO:0006048 UDP-N-acetylglucosamine biosynthetic process; GO:0006082 organic acid metabolic process; GO:0006091 generation of precursor metabolites and energy; GO:0006112 energy reserve metabolic process; GO:0006139 nucleobase-containing compound metabo…	GO:0005622 intracellular; GO:0005623 cell; GO:0005737 cytoplasm; GO:0005829 cytosol; GO:0044424 intracellular part; GO:0044444 cytoplasmic part; GO:0044464 cell part;	GO:0003824 catalytic activity; GO:0004360 glutamine-fructose-6-phosphate transaminase (isomerizing) activity; GO:0005488 binding; GO:0005515 protein binding; GO:0008483 transaminase activity; GO:0016740 transferase activity; GO:0016769 transferase activity, transferring nitrogenous groups; GO:0070548 L-glutamine aminotransferase activity;	K00820	glmS, GFPT; glucosamine---fructose-6-phosphate aminotransferase (isomerizing) [EC:2.6.1.16]	dre00250 Alanine, aspartate and glutamate metabolism - Danio rerio (zebrafish); dre00520 Amino sugar and nucleotide sugar metabolism - Danio rerio (zebrafish); dre01100 Metabolic pathways - Danio rerio (zebrafish);	PF13522	Glutamine amidotransferase domain
F02_transcript_1335	Uncharacterized protein	0.61	Down		2.0188e-05	nucleus	GO:0002200 somatic diversification of immune receptors; GO:0002237 response to molecule of bacterial origin; GO:0002376 immune system process; GO:0002377 immunoglobulin production; GO:0002440 production of molecular mediator of immune response; GO:0002520 immune system development; GO:0002566 somatic diversification of immune receptors via somatic mutation; GO:0006950 response to stress; GO:00069…	GO:0005622 intracellular; GO:0005623 cell; GO:0005634 nucleus; GO:0043226 organelle; GO:0043227 membrane-bounded organelle; GO:0043229 intracellular organelle; GO:0043231 intracellular membrane-bounded organelle; GO:0044424 intracellular part; GO:0044464 cell part;	GO:0003824 catalytic activity; GO:0003924 GTPase activity; GO:0016462 pyrophosphatase activity; GO:0016787 hydrolase activity; GO:0016817 hydrolase activity, acting on acid anhydrides; GO:0016818 hydrolase activity, acting on acid anhydrides, in phosphorus-containing anhydrides; GO:0017111 nucleoside-triphosphatase activity;				PF01541; PF00350	GIY-YIG catalytic domain; Dynamin family
F02_transcript_21642	tapbp, SI:dZ179B20.1, SI:dZ179B20.3, SI:dZ179B20.7, mhc1uda, mhc1ufa, tpsn, zgc:109814; TAP binding protein; K08058 TAP binding protein (tapasin) (A)	0.6	Down	dre05168 Herpes simplex virus 1 infection - Danio rerio (zebrafish);	0.00102292	extracellular	GO:0002376 immune system process; GO:0002474 antigen processing and presentation of peptide antigen via MHC class I; GO:0002478 antigen processing and presentation of exogenous peptide antigen; GO:0002479 antigen processing and presentation of exogenous peptide antigen via MHC class I, TAP-dependent; GO:0006518 peptide metabolic process; GO:0006807 nitrogen compound metabolic process; GO:0006810 …	GO:0000139 Golgi membrane; GO:0005622 intracellular; GO:0005623 cell; GO:0005737 cytoplasm; GO:0005783 endoplasmic reticulum; GO:0005789 endoplasmic reticulum membrane; GO:0005793 endoplasmic reticulum-Golgi intermediate compartment; GO:0005794 Golgi apparatus; GO:0005886 plasma membrane; GO:0005887 integral component of plasma membrane; GO:0012505 endomembrane system; GO:0012506 vesicle membrane…	GO:0003823 antigen binding; GO:0003824 catalytic activity; GO:0005102 receptor binding; GO:0005215 transporter activity; GO:0005488 binding; GO:0005515 protein binding; GO:0015399 primary active transmembrane transporter activity; GO:0015405 P-P-bond-hydrolysis-driven transmembrane transporter activity; GO:0015433 peptide antigen-transporting ATPase activity; GO:0015440 peptide-transporting ATPas…	K08058	TAPBP; TAP binding protein (tapasin)	dre05168 Herpes simplex virus 1 infection - Danio rerio (zebrafish);
F02_transcript_28248	Uncharacterized protein	0.592	Down		0.0427	cytoplasm
F02_transcript_1908	copine II, partial [Bos taurus]	0.591	Down		0.00106282	cytoplasm	GO:0001775 cell activation; GO:0002252 immune effector process; GO:0002263 cell activation involved in immune response; GO:0002274 myeloid leukocyte activation; GO:0002275 myeloid cell activation involved in immune response; GO:0002283 neutrophil activation involved in immune response; GO:0002366 leukocyte activation involved in immune response; GO:0002376 immune system process; GO:0002443 leukoc…	GO:0000323 lytic vacuole; GO:0005622 intracellular; GO:0005623 cell; GO:0005634 nucleus; GO:0005730 nucleolus; GO:0005737 cytoplasm; GO:0005739 mitochondrion; GO:0005764 lysosome; GO:0005765 lysosomal membrane; GO:0005766 primary lysosome; GO:0005773 vacuole; GO:0005774 vacuolar membrane; GO:0005829 cytosol; GO:0005886 plasma membrane; GO:0005912 adherens junction; GO:0005924 cell-substrate adher…	GO:0003824 catalytic activity; GO:0004672 protein kinase activity; GO:0004674 protein serine/threonine kinase activity; GO:0005102 receptor binding; GO:0005215 transporter activity; GO:0005488 binding; GO:0005515 protein binding; GO:0005543 phospholipid binding; GO:0005544 calcium-dependent phospholipid binding; GO:0008289 lipid binding; GO:0016301 kinase activity; GO:0016740 transferase activity…				PF00168	C2 domain
F02_transcript_30051	NADH dehydrogenase [ubiquinone] 1 alpha subcomplex subunit 4-like; K03948 NADH dehydrogenase (ubiquinone) 1 alpha subcomplex subunit 4 (A)	0.588	Down	dre00190 Oxidative phosphorylation - Danio rerio (zebrafish); dre01100 Metabolic pathways - Danio rerio (zebrafish);	0.002098	extracellular	GO:0006091 generation of precursor metabolites and energy; GO:0006119 oxidative phosphorylation; GO:0006120 mitochondrial electron transport, NADH to ubiquinone; GO:0006139 nucleobase-containing compound metabolic process; GO:0006163 purine nucleotide metabolic process; GO:0006725 cellular aromatic compound metabolic process; GO:0006753 nucleoside phosphate metabolic process; GO:0006793 phosphoru…	GO:0005622 intracellular; GO:0005623 cell; GO:0005737 cytoplasm; GO:0005739 mitochondrion; GO:0005740 mitochondrial envelope; GO:0005743 mitochondrial inner membrane; GO:0005746 mitochondrial respiratory chain; GO:0005747 mitochondrial respiratory chain complex I; GO:0005751 mitochondrial respiratory chain complex IV; GO:0016020 membrane; GO:0019866 organelle inner membrane; GO:0030964 NADH dehyd…	GO:0003824 catalytic activity; GO:0003954 NADH dehydrogenase activity; GO:0005488 binding; GO:0008137 NADH dehydrogenase (ubiquinone) activity; GO:0016491 oxidoreductase activity; GO:0016651 oxidoreductase activity, acting on NAD(P)H; GO:0016655 oxidoreductase activity, acting on NAD(P)H, quinone or similar compound as acceptor; GO:0044877 macromolecular complex binding; GO:0050136 NADH dehydroge…	K03948	NDUFA4; NADH dehydrogenase (ubiquinone) 1 alpha subcomplex subunit 4	dre00190 Oxidative phosphorylation - Danio rerio (zebrafish); dre01100 Metabolic pathways - Danio rerio (zebrafish);
F02_transcript_28229	15-hydroxyprostaglandin dehydrogenase [NAD(+)]-like; K00069 15-hydroxyprostaglandin dehydrogenase (NAD) [EC:1.1.1.141] (A)	0.586	Down		0.00053773	cytoplasm	GO:0000003 reproduction; GO:0001523 retinoid metabolic process; GO:0001568 blood vessel development; GO:0001944 vasculature development; GO:0006066 alcohol metabolic process; GO:0006081 cellular aldehyde metabolic process; GO:0006082 organic acid metabolic process; GO:0006629 lipid metabolic process; GO:0006631 fatty acid metabolic process; GO:0006690 icosanoid metabolic process; GO:0006692 prost…	GO:0005576 extracellular region; GO:0005615 extracellular space; GO:0005622 intracellular; GO:0005623 cell; GO:0005634 nucleus; GO:0005654 nucleoplasm; GO:0005737 cytoplasm; GO:0005829 cytosol; GO:0005886 plasma membrane; GO:0016020 membrane; GO:0016323 basolateral plasma membrane; GO:0031974 membrane-enclosed lumen; GO:0031981 nuclear lumen; GO:0043226 organelle; GO:0043227 membrane-bounded orga…	GO:0000166 nucleotide binding; GO:0003824 catalytic activity; GO:0004745 retinol dehydrogenase activity; GO:0004888 transmembrane signaling receptor activity; GO:0004930 G-protein coupled receptor activity; GO:0004953 icosanoid receptor activity; GO:0004954 prostanoid receptor activity; GO:0004955 prostaglandin receptor activity; GO:0004957 prostaglandin E receptor activity; GO:0005488 binding; G…	K00069	HPGD; 15-hydroxyprostaglandin dehydrogenase (NAD) [EC:1.1.1.141]		PF00106	short chain dehydrogenase
F02_transcript_5124	CD48 antigen-like; K06479 CD48 antigen (A)	0.577	Down		0.0110449	endoplasmic reticulum	GO:0001775 cell activation; GO:0001817 regulation of cytokine production; GO:0001819 positive regulation of cytokine production; GO:0002252 immune effector process; GO:0002263 cell activation involved in immune response; GO:0002274 myeloid leukocyte activation; GO:0002275 myeloid cell activation involved in immune response; GO:0002283 neutrophil activation involved in immune response; GO:0002366 …	GO:0005622 intracellular; GO:0005623 cell; GO:0005737 cytoplasm; GO:0005886 plasma membrane; GO:0005887 integral component of plasma membrane; GO:0009986 cell surface; GO:0012505 endomembrane system; GO:0012506 vesicle membrane; GO:0016020 membrane; GO:0016021 integral component of membrane; GO:0030141 secretory granule; GO:0030659 cytoplasmic vesicle membrane; GO:0030667 secretory granule membra…	GO:0005102 receptor binding; GO:0005488 binding; GO:0005515 protein binding;
F02_transcript_6174	Uncharacterized protein	0.575	Down		0.025537	cytoplasm
F02_transcript_1944	Golgi reassembly-stacking protein 2 [Stylophora pistillata]	0.568	Down		0.0198405	cytoplasm,nucleus	GO:0002009 morphogenesis of an epithelium; GO:0002165 instar larval or pupal development; GO:0006464 cellular protein modification process; GO:0006486 protein glycosylation; GO:0006487 protein N-linked glycosylation; GO:0006807 nitrogen compound metabolic process; GO:0006810 transport; GO:0006888 ER to Golgi vesicle-mediated transport; GO:0006900 membrane budding; GO:0006901 vesicle coating; GO:0…	GO:0000139 Golgi membrane; GO:0005622 intracellular; GO:0005623 cell; GO:0005737 cytoplasm; GO:0005783 endoplasmic reticulum; GO:0005793 endoplasmic reticulum-Golgi intermediate compartment; GO:0005794 Golgi apparatus; GO:0005795 Golgi stack; GO:0005798 Golgi-associated vesicle; GO:0005886 plasma membrane; GO:0012505 endomembrane system; GO:0016020 membrane; GO:0031090 organelle membrane; GO:0031…					PF04495	GRASP55/65 PDZ-like domain
F02_transcript_16628	heat shock cognate 71 kDa protein isoform 1 [Mus musculus]	0.567	Down	dre03040 Spliceosome - Danio rerio (zebrafish); dre04010 MAPK signaling pathway - Danio rerio (zebrafish); dre04141 Protein processing in endoplasmic reticulum - Danio rerio (zebrafish); dre04144 Endocytosis - Danio rerio (zebrafish);	0.00030289	cytoplasm				K03283	HSPA1s; heat shock 70kDa protein 1/2/6/8	dre03040 Spliceosome - Danio rerio (zebrafish); dre04010 MAPK signaling pathway - Danio rerio (zebrafish); dre04141 Protein processing in endoplasmic reticulum - Danio rerio (zebrafish); dre04144 Endocytosis - Danio rerio (zebrafish);
F02_transcript_11872	kunitz-type protease inhibitor 1-like; K15619 Kunitz-type protease inhibitor 1 (A)	0.558	Down		0.0040035	plasma membrane	GO:0000003 reproduction; GO:0001568 blood vessel development; GO:0001701 in utero embryonic development; GO:0001763 morphogenesis of a branching structure; GO:0001838 embryonic epithelial tube formation; GO:0001841 neural tube formation; GO:0001843 neural tube closure; GO:0001890 placenta development; GO:0001892 embryonic placenta development; GO:0001944 vasculature development; GO:0002009 morpho…	GO:0005576 extracellular region; GO:0005623 cell; GO:0005886 plasma membrane; GO:0016020 membrane; GO:0044464 cell part; GO:0071944 cell periphery;	GO:0004857 enzyme inhibitor activity; GO:0004866 endopeptidase inhibitor activity; GO:0004867 serine-type endopeptidase inhibitor activity; GO:0030234 enzyme regulator activity; GO:0030414 peptidase inhibitor activity; GO:0061134 peptidase regulator activity; GO:0061135 endopeptidase regulator activity; GO:0098772 molecular function regulator;	K15619	SPINT1; Kunitz-type protease inhibitor 1		PF07502; PF00014	MANEC domain; Kunitz/Bovine pancreatic trypsin inhibitor domain
F02_transcript_13192	keratin, type I cytoskeletal 18 [Bos taurus]	0.557	Down		0.0034027	mitochondria
F02_transcript_12007	calpastatin-like; K04281 calpastatin (A)	0.556	Down		0.0145818	cytoplasm,nucleus	GO:0000003 reproduction; GO:0000768 syncytium formation by plasma membrane fusion; GO:0001775 cell activation; GO:0001889 liver development; GO:0006807 nitrogen compound metabolic process; GO:0006949 syncytium formation; GO:0007275 multicellular organism development; GO:0007338 single fertilization; GO:0007343 egg activation; GO:0007399 nervous system development; GO:0007417 central nervous syste…	GO:0005622 intracellular; GO:0005623 cell; GO:0005634 nucleus; GO:0005737 cytoplasm; GO:0005783 endoplasmic reticulum; GO:0005829 cytosol; GO:0012505 endomembrane system; GO:0014069 postsynaptic density; GO:0016020 membrane; GO:0032279 asymmetric synapse; GO:0043226 organelle; GO:0043227 membrane-bounded organelle; GO:0043229 intracellular organelle; GO:0043231 intracellular membrane-bounded orga…	GO:0002020 protease binding; GO:0004857 enzyme inhibitor activity; GO:0004866 endopeptidase inhibitor activity; GO:0004869 cysteine-type endopeptidase inhibitor activity; GO:0005488 binding; GO:0005515 protein binding; GO:0010859 calcium-dependent cysteine-type endopeptidase inhibitor activity; GO:0019899 enzyme binding; GO:0030234 enzyme regulator activity; GO:0030414 peptidase inhibitor activit…	K04281	CAST; calpastatin
F02_transcript_3205	cell surface A33 antigen-like; K06790 cell surface A33 antigen (A)	0.548	Down		0.00132158	plasma membrane	GO:0007154 cell communication; GO:0007165 signal transduction; GO:0009987 cellular process; GO:0023052 signaling; GO:0050789 regulation of biological process; GO:0050794 regulation of cellular process; GO:0050896 response to stimulus; GO:0051716 cellular response to stimulus; GO:0065007 biological regulation;	GO:0005623 cell; GO:0005886 plasma membrane; GO:0005887 integral component of plasma membrane; GO:0016020 membrane; GO:0016021 integral component of membrane; GO:0031224 intrinsic component of membrane; GO:0031226 intrinsic component of plasma membrane; GO:0044425 membrane part; GO:0044459 plasma membrane part; GO:0044464 cell part; GO:0071944 cell periphery;	GO:0038023 signaling receptor activity; GO:0060089 molecular transducer activity;				PF07686; PF13927	Immunoglobulin V-set domain; Immunoglobulin domain
F02_transcript_21226	Lipopolysaccharide-binding protein [Stylophora pistillata]	0.543	Down		0.00179988	cytoplasm							PF02886	LBP / BPI / CETP family, C-terminal domain
F02_transcript_27233	thioredoxin domain-containing protein 12 precursor [Gallus gallus]	0.529	Down		3.9222e-05	extracellular	GO:0002065 columnar/cuboidal epithelial cell differentiation; GO:0002067 glandular epithelial cell differentiation; GO:0006810 transport; GO:0007275 multicellular organism development; GO:0007589 body fluid secretion; GO:0009653 anatomical structure morphogenesis; GO:0009888 tissue development; GO:0009893 positive regulation of metabolic process; GO:0009966 regulation of signal transduction; GO:0…	GO:0005576 extracellular region; GO:0005615 extracellular space; GO:0005622 intracellular; GO:0005623 cell; GO:0005737 cytoplasm; GO:0005783 endoplasmic reticulum; GO:0012505 endomembrane system; GO:0043226 organelle; GO:0043227 membrane-bounded organelle; GO:0043229 intracellular organelle; GO:0043231 intracellular membrane-bounded organelle; GO:0044421 extracellular region part; GO:0044424 intr…	GO:0002162 dystroglycan binding; GO:0005102 receptor binding; GO:0005154 epidermal growth factor receptor binding; GO:0005488 binding; GO:0005515 protein binding; GO:0042802 identical protein binding; GO:0042803 protein homodimerization activity; GO:0046983 protein dimerization activity; GO:0070851 growth factor receptor binding;	K20356	AGR2; anterior gradient protein 2		PF13899	Thioredoxin-like
F02_transcript_1362	dsc2l, dsc, sb:cb859, wu:fa94h05; desmocollin 2 like; K07601 desmocollin 2 (A)	0.527	Down		5.545e-05	plasma membrane	GO:0001701 in utero embryonic development; GO:0001775 cell activation; GO:0002027 regulation of heart rate; GO:0002252 immune effector process; GO:0002263 cell activation involved in immune response; GO:0002274 myeloid leukocyte activation; GO:0002275 myeloid cell activation involved in immune response; GO:0002283 neutrophil activation involved in immune response; GO:0002366 leukocyte activation …	GO:0001533 cornified envelope; GO:0005576 extracellular region; GO:0005622 intracellular; GO:0005623 cell; GO:0005737 cytoplasm; GO:0005886 plasma membrane; GO:0005911 cell-cell junction; GO:0005912 adherens junction; GO:0005913 cell-cell adherens junction; GO:0005921 gap junction; GO:0012505 endomembrane system; GO:0012506 vesicle membrane; GO:0014704 intercalated disc; GO:0016020 membrane; GO:0…	GO:0005488 binding; GO:0005509 calcium ion binding; GO:0005515 protein binding; GO:0043167 ion binding; GO:0043169 cation binding; GO:0045295 gamma-catenin binding; GO:0046872 metal ion binding; GO:0086080 protein binding involved in heterotypic cell-cell adhesion; GO:0086083 cell adhesive protein binding involved in bundle of His cell-Purkinje myocyte communication; GO:0098631 protein binding in…	K07601	DSC2; desmocollin 2		PF00028	Cadherin domain
F02_transcript_2929	Uncharacterized protein	0.517	Down		0.0057581	cytoplasm							PF03372	Endonuclease/Exonuclease/phosphatase family
F02_transcript_13759	derl1, wu:fb09d07, wu:fb94d05, wu:fj92g12, zgc:55637; derlin 1; K11519 Derlin-1 (A)	0.514	Down	dre04141 Protein processing in endoplasmic reticulum - Danio rerio (zebrafish);	0.00038433	plasma membrane	GO:0006457 protein folding; GO:0006464 cellular protein modification process; GO:0006508 proteolysis; GO:0006511 ubiquitin-dependent protein catabolic process; GO:0006515 misfolded or incompletely synthesized protein catabolic process; GO:0006807 nitrogen compound metabolic process; GO:0006810 transport; GO:0006886 intracellular protein transport; GO:0006950 response to stress; GO:0006986 respons…	GO:0005622 intracellular; GO:0005623 cell; GO:0005737 cytoplasm; GO:0005768 endosome; GO:0005769 early endosome; GO:0005770 late endosome; GO:0005783 endoplasmic reticulum; GO:0005789 endoplasmic reticulum membrane; GO:0012505 endomembrane system; GO:0016020 membrane; GO:0016021 integral component of membrane; GO:0030176 integral component of endoplasmic reticulum membrane; GO:0031224 intrinsic c…	GO:0002020 protease binding; GO:0005102 receptor binding; GO:0005488 binding; GO:0005515 protein binding; GO:0019899 enzyme binding; GO:0031625 ubiquitin protein ligase binding; GO:0038023 signaling receptor activity; GO:0042287 MHC protein binding; GO:0042288 MHC class I protein binding; GO:0044389 ubiquitin-like protein ligase binding; GO:0051117 ATPase binding; GO:0060089 molecular transducer …	K11519	DERL1; Derlin-1	dre04141 Protein processing in endoplasmic reticulum - Danio rerio (zebrafish);
F02_transcript_27307	h-2 class II histocompatibility antigen, A-B alpha chain-like; K06752 major histocompatibility complex, class II (A)	0.512	Down	dre04145 Phagosome - Danio rerio (zebrafish); dre04514 Cell adhesion molecules (CAMs) - Danio rerio (zebrafish); dre04672 Intestinal immune network for IgA production - Danio rerio (zebrafish); dre05168 Herpes simplex virus 1 infection - Danio rerio (zebrafish);	0.0023976	peroxisome				K06752	MHC2; major histocompatibility complex, class II	dre04145 Phagosome - Danio rerio (zebrafish); dre04514 Cell adhesion molecules (CAMs) - Danio rerio (zebrafish); dre04672 Intestinal immune network for IgA production - Danio rerio (zebrafish); dre05168 Herpes simplex virus 1 infection - Danio rerio (zebrafish);	PF07654	Immunoglobulin C1-set domain
F02_transcript_29228	60S ribosomal protein L27-like; K02901 large subunit ribosomal protein L27e (A)	0.51	Down	dre03010 Ribosome - Danio rerio (zebrafish);	0.027239	mitochondria	GO:0002181 cytoplasmic translation; GO:0002262 myeloid cell homeostasis; GO:0002376 immune system process; GO:0002520 immune system development; GO:0006139 nucleobase-containing compound metabolic process; GO:0006364 rRNA processing; GO:0006396 RNA processing; GO:0006412 translation; GO:0006518 peptide metabolic process; GO:0006725 cellular aromatic compound metabolic process; GO:0006807 nitrogen…	GO:0005622 intracellular; GO:0005623 cell; GO:0005737 cytoplasm; GO:0005783 endoplasmic reticulum; GO:0005789 endoplasmic reticulum membrane; GO:0005791 rough endoplasmic reticulum; GO:0005829 cytosol; GO:0005840 ribosome; GO:0012505 endomembrane system; GO:0015934 large ribosomal subunit; GO:0016020 membrane; GO:0022625 cytosolic large ribosomal subunit; GO:0022626 cytosolic ribosome; GO:0030867…	GO:0003735 structural constituent of ribosome; GO:0005198 structural molecule activity;	K02901	RP-L27e, RPL27; large subunit ribosomal protein L27e	dre03010 Ribosome - Danio rerio (zebrafish);
F02_transcript_837	deoxynucleoside triphosphate triphosphohydrolase SAMHD1 [Gallus gallus]	0.508	Down		9.8641e-05	cytoplasm	GO:0002252 immune effector process; GO:0002376 immune system process; GO:0002682 regulation of immune system process; GO:0006139 nucleobase-containing compound metabolic process; GO:0006163 purine nucleotide metabolic process; GO:0006195 purine nucleotide catabolic process; GO:0006203 dGTP catabolic process; GO:0006725 cellular aromatic compound metabolic process; GO:0006753 nucleoside phosphate …	GO:0005622 intracellular; GO:0005623 cell; GO:0005634 nucleus; GO:0005654 nucleoplasm; GO:0005886 plasma membrane; GO:0016020 membrane; GO:0031974 membrane-enclosed lumen; GO:0031981 nuclear lumen; GO:0043226 organelle; GO:0043227 membrane-bounded organelle; GO:0043229 intracellular organelle; GO:0043231 intracellular membrane-bounded organelle; GO:0043233 organelle lumen; GO:0044422 organelle pa…	GO:0000166 nucleotide binding; GO:0003676 nucleic acid binding; GO:0003723 RNA binding; GO:0003824 catalytic activity; GO:0004518 nuclease activity; GO:0004540 ribonuclease activity; GO:0005488 binding; GO:0005515 protein binding; GO:0008270 zinc ion binding; GO:0008832 dGTPase activity; GO:0016787 hydrolase activity; GO:0016788 hydrolase activity, acting on ester bonds; GO:0016793 triphosphoric …
F02_transcript_23097	putative protein PHLOEM PROTEIN 2-LIKE A3 [Stylophora pistillata]	0.507	Down		0.00098107	cytoplasm							PF04548	AIG1 family
F02_transcript_817	Uncharacterized protein	0.499	Down		0.00181594	cytoplasm,nucleus	GO:0002200 somatic diversification of immune receptors; GO:0002237 response to molecule of bacterial origin; GO:0002376 immune system process; GO:0002377 immunoglobulin production; GO:0002440 production of molecular mediator of immune response; GO:0002520 immune system development; GO:0002566 somatic diversification of immune receptors via somatic mutation; GO:0006950 response to stress; GO:00069…	GO:0005622 intracellular; GO:0005623 cell; GO:0005634 nucleus; GO:0043226 organelle; GO:0043227 membrane-bounded organelle; GO:0043229 intracellular organelle; GO:0043231 intracellular membrane-bounded organelle; GO:0044424 intracellular part; GO:0044464 cell part;	GO:0003824 catalytic activity; GO:0003924 GTPase activity; GO:0016462 pyrophosphatase activity; GO:0016787 hydrolase activity; GO:0016817 hydrolase activity, acting on acid anhydrides; GO:0016818 hydrolase activity, acting on acid anhydrides, in phosphorus-containing anhydrides; GO:0017111 nucleoside-triphosphatase activity;				PF01541; PF00350	GIY-YIG catalytic domain; Dynamin family
F02_transcript_4385	collagen type IV alpha-3-binding protein-like; K08283 collagen type IV alpha-3-binding protein (A)	0.47	Down		0.00034254	cytoplasm	GO:0000902 cell morphogenesis; GO:0001701 in utero embryonic development; GO:0002376 immune system process; GO:0003007 heart morphogenesis; GO:0003008 system process; GO:0003012 muscle system process; GO:0006629 lipid metabolic process; GO:0006643 membrane lipid metabolic process; GO:0006665 sphingolipid metabolic process; GO:0006672 ceramide metabolic process; GO:0006793 phosphorus metabolic pro…	GO:0005622 intracellular; GO:0005623 cell; GO:0005634 nucleus; GO:0005654 nucleoplasm; GO:0005737 cytoplasm; GO:0005739 mitochondrion; GO:0005783 endoplasmic reticulum; GO:0005789 endoplasmic reticulum membrane; GO:0005794 Golgi apparatus; GO:0005829 cytosol; GO:0012505 endomembrane system; GO:0016020 membrane; GO:0031974 membrane-enclosed lumen; GO:0031981 nuclear lumen; GO:0031984 organelle sub…	GO:0003824 catalytic activity; GO:0005215 transporter activity; GO:0005319 lipid transporter activity; GO:0005488 binding; GO:0005543 phospholipid binding; GO:0008289 lipid binding; GO:0016301 kinase activity; GO:0016740 transferase activity; GO:0016772 transferase activity, transferring phosphorus-containing groups; GO:0033218 amide binding; GO:0035091 phosphatidylinositol binding; GO:0035620 ce…				PF01852	START domain
F02_transcript_3978	adenosine deaminase-like; K01488 adenosine deaminase [EC:3.5.4.4] (A)	0.463	Down	dre00230 Purine metabolism - Danio rerio (zebrafish); dre01100 Metabolic pathways - Danio rerio (zebrafish);	0.00033975	cytoplasm	GO:0001775 cell activation; GO:0002376 immune system process; GO:0006139 nucleobase-containing compound metabolic process; GO:0006144 purine nucleobase metabolic process; GO:0006152 purine nucleoside catabolic process; GO:0006154 adenosine catabolic process; GO:0006725 cellular aromatic compound metabolic process; GO:0006807 nitrogen compound metabolic process; GO:0008152 metabolic process; GO:00…	GO:0005622 intracellular; GO:0005623 cell; GO:0005737 cytoplasm; GO:0005829 cytosol; GO:0005886 plasma membrane; GO:0009897 external side of plasma membrane; GO:0009986 cell surface; GO:0016020 membrane; GO:0044424 intracellular part; GO:0044425 membrane part; GO:0044444 cytoplasmic part; GO:0044459 plasma membrane part; GO:0044464 cell part; GO:0071944 cell periphery; GO:0098552 side of membrane;	GO:0003824 catalytic activity; GO:0004000 adenosine deaminase activity; GO:0005488 binding; GO:0008270 zinc ion binding; GO:0016787 hydrolase activity; GO:0016810 hydrolase activity, acting on carbon-nitrogen (but not peptide) bonds; GO:0016814 hydrolase activity, acting on carbon-nitrogen (but not peptide) bonds, in cyclic amidines; GO:0019239 deaminase activity; GO:0043167 ion binding; GO:00431…	K01488	add, ADA; adenosine deaminase [EC:3.5.4.4]	dre00230 Purine metabolism - Danio rerio (zebrafish); dre01100 Metabolic pathways - Danio rerio (zebrafish);	PF00962	Adenosine/AMP deaminase
F02_transcript_21950	putative protein PHLOEM PROTEIN 2-LIKE A3 [Stylophora pistillata]	0.454	Down		0.00066362	cytoplasm							PF04548	AIG1 family
F02_transcript_14335	N-alpha-acetyltransferase 35, NatC auxiliary subunit, partial [Stegodyphus mimosarum]	0.449	Down		0.0034562	plasma membrane	GO:0001568 blood vessel development; GO:0001756 somitogenesis; GO:0001944 vasculature development; GO:0002119 nematode larval development; GO:0002164 larval development; GO:0003002 regionalization; GO:0006464 cellular protein modification process; GO:0006473 protein acetylation; GO:0006474 N-terminal protein amino acid acetylation; GO:0006807 nitrogen compound metabolic process; GO:0006950 respon…	GO:0005622 intracellular; GO:0005623 cell; GO:0005737 cytoplasm; GO:0031248 protein acetyltransferase complex; GO:0031414 N-terminal protein acetyltransferase complex; GO:0031417 NatC complex; GO:0032991 macromolecular complex; GO:0044424 intracellular part; GO:0044444 cytoplasmic part; GO:0044464 cell part; GO:1902493 acetyltransferase complex; GO:1902494 catalytic complex; GO:1990234 transferas…	GO:0003824 catalytic activity; GO:0004596 peptide alpha-N-acetyltransferase activity; GO:0008080 N-acetyltransferase activity; GO:0016407 acetyltransferase activity; GO:0016410 N-acyltransferase activity; GO:0016740 transferase activity; GO:0016746 transferase activity, transferring acyl groups; GO:0016747 transferase activity, transferring acyl groups other than amino-acyl groups; GO:0034212 pep…	K20823	NAA35, MAK10; N-alpha-acetyltransferase 35, NatC auxiliary subunit
F02_transcript_24094	zgc:158870; K06752 major histocompatibility complex, class II (A)	0.445	Down		0.00026136	plasma membrane	GO:0001817 regulation of cytokine production; GO:0001819 positive regulation of cytokine production; GO:0002253 activation of immune response; GO:0002376 immune system process; GO:0002429 immune response-activating cell surface receptor signaling pathway; GO:0002478 antigen processing and presentation of exogenous peptide antigen; GO:0002495 antigen processing and presentation of peptide antigen …	GO:0000139 Golgi membrane; GO:0000323 lytic vacuole; GO:0005622 intracellular; GO:0005623 cell; GO:0005737 cytoplasm; GO:0005764 lysosome; GO:0005765 lysosomal membrane; GO:0005768 endosome; GO:0005773 vacuole; GO:0005774 vacuolar membrane; GO:0005783 endoplasmic reticulum; GO:0005789 endoplasmic reticulum membrane; GO:0005794 Golgi apparatus; GO:0005798 Golgi-associated vesicle; GO:0005802 trans…	GO:0003823 antigen binding; GO:0005488 binding; GO:0033218 amide binding; GO:0042277 peptide binding; GO:0042605 peptide antigen binding;				PF00969; PF07654	Class II histocompatibility antigen, beta domain; Immunoglobulin C1-set domain
F02_transcript_21596	Uncharacterized protein	0.444	Down		0.0061403	extracellular		GO:0005622 intracellular; GO:0005623 cell; GO:0005634 nucleus; GO:0005737 cytoplasm; GO:0005856 cytoskeleton; GO:0043226 organelle; GO:0043227 membrane-bounded organelle; GO:0043228 non-membrane-bounded organelle; GO:0043229 intracellular organelle; GO:0043231 intracellular membrane-bounded organelle; GO:0043232 intracellular non-membrane-bounded organelle; GO:0044424 intracellular part; GO:00444…	GO:0005488 binding; GO:0005515 protein binding; GO:0008092 cytoskeletal protein binding; GO:0017022 myosin binding; GO:0031005 filamin binding; GO:0032036 myosin heavy chain binding; GO:0042805 actinin binding; GO:0051371 muscle alpha-actinin binding; GO:0051393 alpha-actinin binding;	K23353			PF00412	LIM domain
F02_transcript_16716	interferon-induced guanylate-binding protein 1 [Sus scrofa]	0.44	Down	dre04621 NOD-like receptor signaling pathway - Danio rerio (zebrafish);	0.00107547	cytoplasm	GO:0001562 response to protozoan; GO:0001816 cytokine production; GO:0001817 regulation of cytokine production; GO:0001818 negative regulation of cytokine production; GO:0001819 positive regulation of cytokine production; GO:0001932 regulation of protein phosphorylation; GO:0001933 negative regulation of protein phosphorylation; GO:0002237 response to molecule of bacterial origin; GO:0002376 immu…	GO:0005576 extracellular region; GO:0005622 intracellular; GO:0005623 cell; GO:0005634 nucleus; GO:0005654 nucleoplasm; GO:0005737 cytoplasm; GO:0005794 Golgi apparatus; GO:0005829 cytosol; GO:0005856 cytoskeleton; GO:0012505 endomembrane system; GO:0012506 vesicle membrane; GO:0015629 actin cytoskeleton; GO:0016020 membrane; GO:0018995 host; GO:0020003 symbiont-containing vacuole; GO:0020005 sym…	GO:0000166 nucleotide binding; GO:0001882 nucleoside binding; GO:0001883 purine nucleoside binding; GO:0003779 actin binding; GO:0003824 catalytic activity; GO:0003924 GTPase activity; GO:0005488 binding; GO:0005515 protein binding; GO:0005525 GTP binding; GO:0008092 cytoskeletal protein binding; GO:0016462 pyrophosphatase activity; GO:0016787 hydrolase activity; GO:0016817 hydrolase activity, ac…	K20899	GBP1_3_4_7; guanylate-binding protein 1/3/4/7	dre04621 NOD-like receptor signaling pathway - Danio rerio (zebrafish);	PF02263; PF02841	Guanylate-binding protein, N-terminal domain; Guanylate-binding protein, C-terminal domain
F02_transcript_13945	Uncharacterized protein	0.438	Down		0.0008785	cytoplasm	GO:0002200 somatic diversification of immune receptors; GO:0002237 response to molecule of bacterial origin; GO:0002376 immune system process; GO:0002377 immunoglobulin production; GO:0002440 production of molecular mediator of immune response; GO:0002520 immune system development; GO:0002566 somatic diversification of immune receptors via somatic mutation; GO:0006950 response to stress; GO:00069…	GO:0005622 intracellular; GO:0005623 cell; GO:0005634 nucleus; GO:0043226 organelle; GO:0043227 membrane-bounded organelle; GO:0043229 intracellular organelle; GO:0043231 intracellular membrane-bounded organelle; GO:0044424 intracellular part; GO:0044464 cell part;	GO:0003824 catalytic activity; GO:0003924 GTPase activity; GO:0016462 pyrophosphatase activity; GO:0016787 hydrolase activity; GO:0016817 hydrolase activity, acting on acid anhydrides; GO:0016818 hydrolase activity, acting on acid anhydrides, in phosphorus-containing anhydrides; GO:0017111 nucleoside-triphosphatase activity;				PF01541; PF00350	GIY-YIG catalytic domain; Dynamin family
F02_transcript_24615	Uncharacterized protein	0.434	Down		0.00026046	extracellular	GO:0006950 response to stress; GO:0006952 defense response; GO:0008152 metabolic process; GO:0009056 catabolic process; GO:0009605 response to external stimulus; GO:0009607 response to biotic stimulus; GO:0009617 response to bacterium; GO:0009987 cellular process; GO:0016998 cell wall macromolecule catabolic process; GO:0042742 defense response to bacterium; GO:0043170 macromolecule metabolic pro…	GO:0001669 acrosomal vesicle; GO:0005576 extracellular region; GO:0005615 extracellular space; GO:0005622 intracellular; GO:0005623 cell; GO:0005737 cytoplasm; GO:0005886 plasma membrane; GO:0012505 endomembrane system; GO:0016020 membrane; GO:0030141 secretory granule; GO:0031410 cytoplasmic vesicle; GO:0031982 vesicle; GO:0043226 organelle; GO:0043227 membrane-bounded organelle; GO:0043229 intr…	GO:0003796 lysozyme activity; GO:0003824 catalytic activity; GO:0004553 hydrolase activity, hydrolyzing O-glycosyl compounds; GO:0016787 hydrolase activity; GO:0016798 hydrolase activity, acting on glycosyl bonds; GO:0061783 peptidoglycan muralytic activity;				PF00021	u-PAR/Ly-6 domain
F02_transcript_29112	Uncharacterized protein	0.431	Down		0.0194582	cytoplasm
F02_transcript_1230	Uncharacterized protein	0.406	Down		3.9833e-05	nucleus	GO:0002200 somatic diversification of immune receptors; GO:0002237 response to molecule of bacterial origin; GO:0002376 immune system process; GO:0002377 immunoglobulin production; GO:0002440 production of molecular mediator of immune response; GO:0002520 immune system development; GO:0002566 somatic diversification of immune receptors via somatic mutation; GO:0006950 response to stress; GO:00069…	GO:0005622 intracellular; GO:0005623 cell; GO:0005634 nucleus; GO:0043226 organelle; GO:0043227 membrane-bounded organelle; GO:0043229 intracellular organelle; GO:0043231 intracellular membrane-bounded organelle; GO:0044424 intracellular part; GO:0044464 cell part;	GO:0003824 catalytic activity; GO:0003924 GTPase activity; GO:0016462 pyrophosphatase activity; GO:0016787 hydrolase activity; GO:0016817 hydrolase activity, acting on acid anhydrides; GO:0016818 hydrolase activity, acting on acid anhydrides, in phosphorus-containing anhydrides; GO:0017111 nucleoside-triphosphatase activity;				PF01541; PF00350	GIY-YIG catalytic domain; Dynamin family
F02_transcript_13221	inositol-3-phosphate synthase 1-A-like; K01858 myo-inositol-1-phosphate synthase [EC:5.5.1.4] (A)	0.385	Down		0.00032317	plasma membrane	GO:0005975 carbohydrate metabolic process; GO:0006020 inositol metabolic process; GO:0006021 inositol biosynthetic process; GO:0006066 alcohol metabolic process; GO:0006793 phosphorus metabolic process; GO:0006796 phosphate-containing compound metabolic process; GO:0008152 metabolic process; GO:0009058 biosynthetic process; GO:0009987 cellular process; GO:0016051 carbohydrate biosynthetic process…	GO:0005622 intracellular; GO:0005623 cell; GO:0005737 cytoplasm; GO:0005829 cytosol; GO:0044424 intracellular part; GO:0044444 cytoplasmic part; GO:0044464 cell part;	GO:0003824 catalytic activity; GO:0004512 inositol-3-phosphate synthase activity; GO:0016853 isomerase activity; GO:0016872 intramolecular lyase activity;
F02_transcript_29123	Uncharacterized protein	0.37	Down		0.0005005	mitochondria				K05127	PTK7, CCK4; PTK7 protein tyrosine kinase 7 [EC:2.7.10.1]
F02_transcript_21519	Uncharacterized protein	0.364	Down		0.00022286	nucleus
F02_transcript_26086	serine/threonine-protein kinase Nek6-like; K08857 NIMA (never in mitosis gene a)-related kinase [EC:2.7.11.1] (A)	0.338	Down		0.0227	cytoplasm	GO:0000226 microtubule cytoskeleton organization; GO:0000278 mitotic cell cycle; GO:0001932 regulation of protein phosphorylation; GO:0001934 positive regulation of protein phosphorylation; GO:0006464 cellular protein modification process; GO:0006468 protein phosphorylation; GO:0006793 phosphorus metabolic process; GO:0006796 phosphate-containing compound metabolic process; GO:0006807 nitrogen co…	GO:0000922 spindle pole; GO:0005622 intracellular; GO:0005623 cell; GO:0005634 nucleus; GO:0005654 nucleoplasm; GO:0005737 cytoplasm; GO:0005815 microtubule organizing center; GO:0005819 spindle; GO:0005829 cytosol; GO:0005856 cytoskeleton; GO:0015630 microtubule cytoskeleton; GO:0016604 nuclear body; GO:0016607 nuclear speck; GO:0031974 membrane-enclosed lumen; GO:0031981 nuclear lumen; GO:00329…	GO:0000166 nucleotide binding; GO:0000287 magnesium ion binding; GO:0001221 transcription cofactor binding; GO:0001222 transcription corepressor binding; GO:0003824 catalytic activity; GO:0004672 protein kinase activity; GO:0004674 protein serine/threonine kinase activity; GO:0005488 binding; GO:0005515 protein binding; GO:0005524 ATP binding; GO:0008092 cytoskeletal protein binding; GO:0008134 t…	K20875	NEK6; NIMA (never in mitosis gene a)-related kinase 6 [EC:2.7.11.1]		PF00069	Protein kinase domain
F02_transcript_15329	mhc1uea, Dare-UEA, UEA, fb69e07, wu:fb69e07; major histocompatibility complex class I UEA; K06751 major histocompatibility complex, class I (A)	0.335	Down	dre04144 Endocytosis - Danio rerio (zebrafish); dre04145 Phagosome - Danio rerio (zebrafish); dre04218 Cellular senescence - Danio rerio (zebrafish); dre04514 Cell adhesion molecules (CAMs) - Danio rerio (zebrafish); dre05168 Herpes simplex virus 1 infection - Danio rerio (zebrafish);	0.00030324	extracellular				K06751	MHC1; major histocompatibility complex, class I	dre04144 Endocytosis - Danio rerio (zebrafish); dre04145 Phagosome - Danio rerio (zebrafish); dre04218 Cellular senescence - Danio rerio (zebrafish); dre04514 Cell adhesion molecules (CAMs) - Danio rerio (zebrafish); dre05168 Herpes simplex virus 1 infection - Danio rerio (zebrafish);	PF00129; PF07654	Class I Histocompatibility antigen, domains alpha 1 and 2; Immunoglobulin C1-set domain
F02_transcript_1355	Uncharacterized protein	0.325	Down		0.0015165	nucleus	GO:0002200 somatic diversification of immune receptors; GO:0002237 response to molecule of bacterial origin; GO:0002376 immune system process; GO:0002377 immunoglobulin production; GO:0002440 production of molecular mediator of immune response; GO:0002520 immune system development; GO:0002566 somatic diversification of immune receptors via somatic mutation; GO:0006950 response to stress; GO:00069…	GO:0005622 intracellular; GO:0005623 cell; GO:0005634 nucleus; GO:0043226 organelle; GO:0043227 membrane-bounded organelle; GO:0043229 intracellular organelle; GO:0043231 intracellular membrane-bounded organelle; GO:0044424 intracellular part; GO:0044464 cell part;	GO:0003824 catalytic activity; GO:0003924 GTPase activity; GO:0016462 pyrophosphatase activity; GO:0016787 hydrolase activity; GO:0016817 hydrolase activity, acting on acid anhydrides; GO:0016818 hydrolase activity, acting on acid anhydrides, in phosphorus-containing anhydrides; GO:0017111 nucleoside-triphosphatase activity;				PF01541; PF00350	GIY-YIG catalytic domain; Dynamin family
F02_transcript_7131	glycerol kinase-like; K00864 glycerol kinase [EC:2.7.1.30] (A)	0.267	Down	dre00561 Glycerolipid metabolism - Danio rerio (zebrafish); dre01100 Metabolic pathways - Danio rerio (zebrafish); dre03320 PPAR signaling pathway - Danio rerio (zebrafish);	0.00110289	cytoplasm	GO:0005975 carbohydrate metabolic process; GO:0006066 alcohol metabolic process; GO:0006071 glycerol metabolic process; GO:0006072 glycerol-3-phosphate metabolic process; GO:0006629 lipid metabolic process; GO:0006638 neutral lipid metabolic process; GO:0006639 acylglycerol metabolic process; GO:0006641 triglyceride metabolic process; GO:0006793 phosphorus metabolic process; GO:0006796 phosphate-…	GO:0005622 intracellular; GO:0005623 cell; GO:0005634 nucleus; GO:0005737 cytoplasm; GO:0005739 mitochondrion; GO:0005740 mitochondrial envelope; GO:0005741 mitochondrial outer membrane; GO:0005829 cytosol; GO:0016020 membrane; GO:0019867 outer membrane; GO:0031090 organelle membrane; GO:0031966 mitochondrial membrane; GO:0031967 organelle envelope; GO:0031968 organelle outer membrane; GO:0031975…	GO:0003824 catalytic activity; GO:0004370 glycerol kinase activity; GO:0005488 binding; GO:0005515 protein binding; GO:0016301 kinase activity; GO:0016740 transferase activity; GO:0016772 transferase activity, transferring phosphorus-containing groups; GO:0016773 phosphotransferase activity, alcohol group as acceptor; GO:0042393 histone binding;	K00864	glpK, GK; glycerol kinase [EC:2.7.1.30]	dre00561 Glycerolipid metabolism - Danio rerio (zebrafish); dre01100 Metabolic pathways - Danio rerio (zebrafish); dre03320 PPAR signaling pathway - Danio rerio (zebrafish);	PF00370; PF02782	FGGY family of carbohydrate kinases, N-terminal domain; FGGY family of carbohydrate kinases, C-terminal domain
F02_transcript_1347	zinc transporter 9-like; K14696 solute carrier family 30 (zinc transporter), member 9 (A)	0.263	Down		0.0138424	cytoplasm	GO:0000041 transition metal ion transport; GO:0006139 nucleobase-containing compound metabolic process; GO:0006259 DNA metabolic process; GO:0006281 DNA repair; GO:0006289 nucleotide-excision repair; GO:0006355 regulation of transcription, DNA-templated; GO:0006357 regulation of transcription from RNA polymerase II promoter; GO:0006725 cellular aromatic compound metabolic process; GO:0006807 nitr…	GO:0005622 intracellular; GO:0005623 cell; GO:0005634 nucleus; GO:0005737 cytoplasm; GO:0005783 endoplasmic reticulum; GO:0005856 cytoskeleton; GO:0012505 endomembrane system; GO:0031410 cytoplasmic vesicle; GO:0031982 vesicle; GO:0043226 organelle; GO:0043227 membrane-bounded organelle; GO:0043228 non-membrane-bounded organelle; GO:0043229 intracellular organelle; GO:0043231 intracellular membra…	GO:0000981 RNA polymerase II transcription factor activity, sequence-specific DNA binding; GO:0003682 chromatin binding; GO:0003700 transcription factor activity, sequence-specific DNA binding; GO:0003712 transcription cofactor activity; GO:0003713 transcription coactivator activity; GO:0005102 receptor binding; GO:0005215 transporter activity; GO:0005385 zinc ion transmembrane transporter activi…	K14696	SLC30A9, ZNT9; solute carrier family 30 (zinc transporter), member 9
F02_transcript_6934	deoxynucleoside triphosphate triphosphohydrolase SAMHD1 [Gallus gallus]	0.255	Down		3.768e-05	nucleus	GO:0002252 immune effector process; GO:0002376 immune system process; GO:0002682 regulation of immune system process; GO:0006139 nucleobase-containing compound metabolic process; GO:0006163 purine nucleotide metabolic process; GO:0006195 purine nucleotide catabolic process; GO:0006203 dGTP catabolic process; GO:0006725 cellular aromatic compound metabolic process; GO:0006753 nucleoside phosphate …	GO:0005622 intracellular; GO:0005623 cell; GO:0005634 nucleus; GO:0005654 nucleoplasm; GO:0005886 plasma membrane; GO:0016020 membrane; GO:0031974 membrane-enclosed lumen; GO:0031981 nuclear lumen; GO:0043226 organelle; GO:0043227 membrane-bounded organelle; GO:0043229 intracellular organelle; GO:0043231 intracellular membrane-bounded organelle; GO:0043233 organelle lumen; GO:0044422 organelle pa…	GO:0000166 nucleotide binding; GO:0003676 nucleic acid binding; GO:0003723 RNA binding; GO:0003824 catalytic activity; GO:0004518 nuclease activity; GO:0004540 ribonuclease activity; GO:0005488 binding; GO:0005515 protein binding; GO:0008270 zinc ion binding; GO:0008832 dGTPase activity; GO:0016787 hydrolase activity; GO:0016788 hydrolase activity, acting on ester bonds; GO:0016793 triphosphoric …	K22544			PF07647	SAM domain (Sterile alpha motif)
F02_transcript_10487	major histocompatibility complex class I UFA precursor [Danio rerio]	0.241	Down		0.000101677	extracellular							PF00129; PF07654	Class I Histocompatibility antigen, domains alpha 1 and 2; Immunoglobulin C1-set domain
F02_transcript_26790	MHCII, si:busm1-48c11.4, si:dz194e12.12, si:dz48c11.4, zgc:123061; si:busm1-194e12.12; K06752 major histocompatibility complex, class II (A)	0.209	Down	dre04145 Phagosome - Danio rerio (zebrafish); dre04514 Cell adhesion molecules (CAMs) - Danio rerio (zebrafish); dre04672 Intestinal immune network for IgA production - Danio rerio (zebrafish); dre05168 Herpes simplex virus 1 infection - Danio rerio (zebrafish);	0.00038322	plasma membrane	GO:0001817 regulation of cytokine production; GO:0001819 positive regulation of cytokine production; GO:0002253 activation of immune response; GO:0002376 immune system process; GO:0002429 immune response-activating cell surface receptor signaling pathway; GO:0002478 antigen processing and presentation of exogenous peptide antigen; GO:0002495 antigen processing and presentation of peptide antigen …	GO:0000139 Golgi membrane; GO:0000323 lytic vacuole; GO:0005622 intracellular; GO:0005623 cell; GO:0005737 cytoplasm; GO:0005764 lysosome; GO:0005765 lysosomal membrane; GO:0005768 endosome; GO:0005773 vacuole; GO:0005774 vacuolar membrane; GO:0005783 endoplasmic reticulum; GO:0005789 endoplasmic reticulum membrane; GO:0005794 Golgi apparatus; GO:0005798 Golgi-associated vesicle; GO:0005802 trans…	GO:0003823 antigen binding; GO:0005488 binding; GO:0033218 amide binding; GO:0042277 peptide binding; GO:0042605 peptide antigen binding;	K06752	MHC2; major histocompatibility complex, class II	dre04145 Phagosome - Danio rerio (zebrafish); dre04514 Cell adhesion molecules (CAMs) - Danio rerio (zebrafish); dre04672 Intestinal immune network for IgA production - Danio rerio (zebrafish); dre05168 Herpes simplex virus 1 infection - Danio rerio (zebrafish);	PF00969; PF07654	Class II histocompatibility antigen, beta domain; Immunoglobulin C1-set domain
F02_transcript_23168	Ubiquitin-60S ribosomal protein L40 [Stylophora pistillata]	0.202	Down		0.000179031	extracellular
F02_transcript_4225	deoxynucleoside triphosphate triphosphohydrolase SAMHD1 [Gallus gallus]	0.196	Down		0.00059736	cytoplasm,nucleus	GO:0002252 immune effector process; GO:0002376 immune system process; GO:0002682 regulation of immune system process; GO:0006139 nucleobase-containing compound metabolic process; GO:0006163 purine nucleotide metabolic process; GO:0006195 purine nucleotide catabolic process; GO:0006203 dGTP catabolic process; GO:0006725 cellular aromatic compound metabolic process; GO:0006753 nucleoside phosphate …	GO:0005622 intracellular; GO:0005623 cell; GO:0005634 nucleus; GO:0005654 nucleoplasm; GO:0005886 plasma membrane; GO:0016020 membrane; GO:0031974 membrane-enclosed lumen; GO:0031981 nuclear lumen; GO:0043226 organelle; GO:0043227 membrane-bounded organelle; GO:0043229 intracellular organelle; GO:0043231 intracellular membrane-bounded organelle; GO:0043233 organelle lumen; GO:0044422 organelle pa…	GO:0000166 nucleotide binding; GO:0003676 nucleic acid binding; GO:0003723 RNA binding; GO:0003824 catalytic activity; GO:0004518 nuclease activity; GO:0004540 ribonuclease activity; GO:0005488 binding; GO:0005515 protein binding; GO:0008270 zinc ion binding; GO:0008832 dGTPase activity; GO:0016787 hydrolase activity; GO:0016788 hydrolase activity, acting on ester bonds; GO:0016793 triphosphoric …	K22544			PF07647	SAM domain (Sterile alpha motif)
F02_transcript_11163	major histocompatibility complex class I UFA precursor [Danio rerio]	0.18	Down	dre04144 Endocytosis - Danio rerio (zebrafish); dre04145 Phagosome - Danio rerio (zebrafish); dre04218 Cellular senescence - Danio rerio (zebrafish); dre04514 Cell adhesion molecules (CAMs) - Danio rerio (zebrafish); dre05168 Herpes simplex virus 1 infection - Danio rerio (zebrafish);	0.00036249	extracellular				K06751	MHC1; major histocompatibility complex, class I	dre04144 Endocytosis - Danio rerio (zebrafish); dre04145 Phagosome - Danio rerio (zebrafish); dre04218 Cellular senescence - Danio rerio (zebrafish); dre04514 Cell adhesion molecules (CAMs) - Danio rerio (zebrafish); dre05168 Herpes simplex virus 1 infection - Danio rerio (zebrafish);	PF00129; PF07654	Class I Histocompatibility antigen, domains alpha 1 and 2; Immunoglobulin C1-set domain
F02_transcript_8985	deoxynucleoside triphosphate triphosphohydrolase SAMHD1 [Gallus gallus]	0.167	Down		1.65831e-05	cytoplasm	GO:0002252 immune effector process; GO:0002376 immune system process; GO:0002682 regulation of immune system process; GO:0006139 nucleobase-containing compound metabolic process; GO:0006163 purine nucleotide metabolic process; GO:0006195 purine nucleotide catabolic process; GO:0006203 dGTP catabolic process; GO:0006725 cellular aromatic compound metabolic process; GO:0006753 nucleoside phosphate …	GO:0005622 intracellular; GO:0005623 cell; GO:0005634 nucleus; GO:0005654 nucleoplasm; GO:0005886 plasma membrane; GO:0016020 membrane; GO:0031974 membrane-enclosed lumen; GO:0031981 nuclear lumen; GO:0043226 organelle; GO:0043227 membrane-bounded organelle; GO:0043229 intracellular organelle; GO:0043231 intracellular membrane-bounded organelle; GO:0043233 organelle lumen; GO:0044422 organelle pa…	GO:0000166 nucleotide binding; GO:0003676 nucleic acid binding; GO:0003723 RNA binding; GO:0003824 catalytic activity; GO:0004518 nuclease activity; GO:0004540 ribonuclease activity; GO:0005488 binding; GO:0005515 protein binding; GO:0008270 zinc ion binding; GO:0008832 dGTPase activity; GO:0016787 hydrolase activity; GO:0016788 hydrolase activity, acting on ester bonds; GO:0016793 triphosphoric …	K22544
F02_transcript_15350	Uncharacterized protein	0.16	Down		2.3809e-05	cytoplasm
F02_transcript_9314	deoxynucleoside triphosphate triphosphohydrolase SAMHD1 [Gallus gallus]	0.13	Down		1.79666e-05	cytoplasm	GO:0002252 immune effector process; GO:0002376 immune system process; GO:0002682 regulation of immune system process; GO:0006139 nucleobase-containing compound metabolic process; GO:0006163 purine nucleotide metabolic process; GO:0006195 purine nucleotide catabolic process; GO:0006203 dGTP catabolic process; GO:0006725 cellular aromatic compound metabolic process; GO:0006753 nucleoside phosphate …	GO:0005622 intracellular; GO:0005623 cell; GO:0005634 nucleus; GO:0005654 nucleoplasm; GO:0005886 plasma membrane; GO:0016020 membrane; GO:0031974 membrane-enclosed lumen; GO:0031981 nuclear lumen; GO:0043226 organelle; GO:0043227 membrane-bounded organelle; GO:0043229 intracellular organelle; GO:0043231 intracellular membrane-bounded organelle; GO:0043233 organelle lumen; GO:0044422 organelle pa…	GO:0000166 nucleotide binding; GO:0003676 nucleic acid binding; GO:0003723 RNA binding; GO:0003824 catalytic activity; GO:0004518 nuclease activity; GO:0004540 ribonuclease activity; GO:0005488 binding; GO:0005515 protein binding; GO:0008270 zinc ion binding; GO:0008832 dGTPase activity; GO:0016787 hydrolase activity; GO:0016788 hydrolase activity, acting on ester bonds; GO:0016793 triphosphoric …
F02_transcript_16088	mhc2a, a4; major histocompatibility complex class II integral membrane alpha chain gene; K06752 major histocompatibility complex, class II (A)	0.115	Down	dre04145 Phagosome - Danio rerio (zebrafish); dre04514 Cell adhesion molecules (CAMs) - Danio rerio (zebrafish); dre04672 Intestinal immune network for IgA production - Danio rerio (zebrafish); dre05168 Herpes simplex virus 1 infection - Danio rerio (zebrafish);	5.9994e-05	cytoplasm				K06752	MHC2; major histocompatibility complex, class II	dre04145 Phagosome - Danio rerio (zebrafish); dre04514 Cell adhesion molecules (CAMs) - Danio rerio (zebrafish); dre04672 Intestinal immune network for IgA production - Danio rerio (zebrafish); dre05168 Herpes simplex virus 1 infection - Danio rerio (zebrafish);	PF00993	Class II histocompatibility antigen, alpha domain
F02_transcript_14050	NACHT, LRR and PYD domains-containing protein 3 [Sus scrofa]	0.11	Down		0.000139062	cytoplasm,nucleus
F02_transcript_28030	lgals3l, Drgal3, fc90g02, wu:fc90g02, zgc:123117; lectin, galactoside-binding, soluble, 3 (galectin 3)-like; K06831 galectin-3 (A)	0.103	Down		2.0462e-06	cytoplasm				K06831	LGALS3; galectin-3		PF00337	Galactoside-binding lectin
F02_transcript_25088	tripartite motif-containing protein 16-like; K12006 tripartite motif-containing protein 16 (A)	0.083	Down		3.7058e-05	extracellular
F02_transcript_9081	keratin, type I cytoskeletal 14-like; K07604 type I keratin, acidic (A)	0.058	Down		0.03524	extracellular
F02_transcript_893	dspa, im:6911953, sb:cb570, wu:fc17a08, wu:fk73d01; desmoplakin a; K10381 desmoplakin (A)	0.052	Down		0.000584	nucleus	GO:0001775 cell activation; GO:0002027 regulation of heart rate; GO:0002252 immune effector process; GO:0002263 cell activation involved in immune response; GO:0002274 myeloid leukocyte activation; GO:0002275 myeloid cell activation involved in immune response; GO:0002283 neutrophil activation involved in immune response; GO:0002366 leukocyte activation involved in immune response; GO:0002376 imm…	GO:0001533 cornified envelope; GO:0005622 intracellular; GO:0005623 cell; GO:0005737 cytoplasm; GO:0005886 plasma membrane; GO:0005911 cell-cell junction; GO:0005912 adherens junction; GO:0005913 cell-cell adherens junction; GO:0005916 fascia adherens; GO:0012505 endomembrane system; GO:0012506 vesicle membrane; GO:0014704 intercalated disc; GO:0016020 membrane; GO:0016323 basolateral plasma memb…	GO:0005080 protein kinase C binding; GO:0005198 structural molecule activity; GO:0005200 structural constituent of cytoskeleton; GO:0005488 binding; GO:0005515 protein binding; GO:0019899 enzyme binding; GO:0019900 kinase binding; GO:0019901 protein kinase binding; GO:0030674 protein binding, bridging; GO:0060090 binding, bridging; GO:0086080 protein binding involved in heterotypic cell-cell adhe…	K10381	DSP; desmoplakin
